# Supplementary material for: Platelet proteomic signatures of amyloid β-positive mild cognitive impairment and Alzheimer’s disease
Source: Mol Brain. 2026 Mar 28;19:33. doi: 10.1186/s13041-026-01294-2 (PMC13151324; doi:10.1186/s13041-026-01294-2)
Supplement: Supplementary file 4 — Supplementary Material 4 Quantified proteins and peptides in platelets [file 13041_2026_1294_MOESM4_ESM.xlsx]

## Sheet: Quantified proteins
Accession	Gene name	Description	#Peptides	AD-1	AD-2	AD-3	AD-4	MCI-A(+)-1	MCI-A(+)-2	MCI-A(+)-3	MCI-A(+)-4	MCI-A(+)-5	MCI-A(-)-1	MCI-A(-)-2	MCI-A(-)-3	MCI-A(-)-4	MCI-A(-)-5	SMI-1	SMI-2	SMI-3	SMI-4
P12814	ACTN1	Alpha-actinin-1	57	4.6458e+06	4.76133e+06	1.25797e+07	6.16248e+06	1.12989e+07	1.13002e+07	7.21687e+06	5.94876e+06	5.94344e+06	1.06411e+07	4.9624e+06	6.38209e+06	6.18031e+06	4.98156e+06	6.91454e+06	4.95005e+06	5.40712e+06	4.96167e+06
Q6RW13	AGTRAP	Type-1 angiotensin II receptor-associated protein	3	426351	461777	641697	477266	641675	626344	461777	606140	475537	685773	460045	359620	422841	409470	498915	567362	379284	447027
Q01518	CAP1	Adenylyl cyclase-associated protein 1	25	1.55317e+06	2.00343e+06	2.07212e+06	1.91792e+06	2.26256e+06	1.98692e+06	1.74183e+06	2.34564e+06	2.00043e+06	2.04373e+06	1.76247e+06	1.9445e+06	1.59426e+06	1.70222e+06	1.77158e+06	2.23816e+06	1.90147e+06	2.1053e+06
P47756	CAPZB	F-actin-capping protein subunit beta	14	874134	1.0764e+06	899668	1.0012e+06	886180	809890	1.06416e+06	753325	1.00247e+06	831597	962386	1.05846e+06	977545	1.09623e+06	907105	1.00166e+06	1.04344e+06	1.11139e+06
Q9UJU6	DBNL	Drebrin-like protein	18	771690	745650	914353	906390	1.02727e+06	883366	834921	838398	931810	994655	717328	740617	745727	734325	852846	948717	801142	947599
Q9BSJ8	ESYT1	Extended synaptotagmin-1	33	1.14987e+06	870459	1.52253e+06	1.0585e+06	1.41803e+06	1.52059e+06	1.1083e+06	1.29982e+06	1.1759e+06	1.51965e+06	986627	960040	1.11264e+06	932453	1.3267e+06	1.29145e+06	1.0628e+06	989218
P16930	FAH	Fumarylacetoacetase	9	403132	355473	437098	443482	448832	436829	415763	466031	429810	469403	468589	421621	409083	502578	478445	567621	477830	482476
O94915	FRYL	Protein furry homolog-like	7	650824	578231	248945	441399	244833	240603	657516	273993	356303	254079	701523	595151	764129	603164	523443	232298	664565	608059
P01892	HLA-A	HLA class I histocompatibility antigen, A-2 alpha chain	10	920370	417021	191884	412134	702727	110538	454718	123407	195489	97315	392994	259341	455827	256489	236484	193098	343618	410435
P30479	HLA-B	HLA class I histocompatibility antigen, B-41 alpha chain	11	103075	80715.7	173988	71174.9	167003	79150.9	75257.4	64847.3	77573.7	212207	57101.5	85143.3	89306.6	79441.9	72735	214489	73019.9	110037
Q14766	LTBP1	Latent-transforming growth factor beta-binding protein 1	51	1.34926e+06	1.51317e+06	1.12212e+06	1.3216e+06	1.70408e+06	1.55127e+06	1.43854e+06	1.76161e+06	1.55784e+06	1.78258e+06	1.23542e+06	1.3079e+06	1.26438e+06	1.28878e+06	1.32371e+06	1.59898e+06	1.36153e+06	1.74336e+06
Q9UPN3	MACF1	Microtubule-actin cross-linking factor 1, isoforms 1/2/3/5	108	1.3055e+06	1.37414e+06	2.58927e+06	1.66951e+06	2.54787e+06	2.34857e+06	1.48132e+06	2.27969e+06	1.80616e+06	2.47941e+06	1.32925e+06	1.33764e+06	1.49732e+06	1.28101e+06	1.71874e+06	1.77898e+06	1.28193e+06	1.03335e+06
P33908	MAN1A1	Mannosyl-oligosaccharide 1,2-alpha-mannosidase IA	7	321130	391830	538909	550821	585460	531376	417584	465270	506804	495500	383509	363882	389862	392371	323068	424207	414929	392371
Q16539	MAPK14	Mitogen-activated protein kinase 14	11	361717	468684	440694	494785	493354	477741	498626	492873	445080	447560	453034	443160	421759	439865	471828	584221	455005	498159
Q0ZGT2	NEXN	Nexilin	24	607751	582539	771468	626217	885198	705092	617402	474090	574863	863977	530816	563662	515089	524109	495753	788098	752688	645583
Q9NR12	PDLIM7	PDZ and LIM domain protein 7	12	1.87434e+06	1.547e+06	2.1672e+06	1.75812e+06	1.95184e+06	1.89472e+06	1.57472e+06	1.47978e+06	1.80596e+06	2.22038e+06	1.52753e+06	1.71679e+06	1.52709e+06	1.5661e+06	1.69942e+06	1.58867e+06	1.49385e+06	1.79796e+06
P14618	PKM	Pyruvate kinase PKM	34	2.99434e+06	3.46097e+06	5.91531e+06	3.64078e+06	4.87507e+06	5.19852e+06	3.7394e+06	4.751e+06	4.32611e+06	5.06411e+06	3.46849e+06	4.04137e+06	2.96631e+06	3.60033e+06	3.75514e+06	4.75043e+06	3.31276e+06	3.88146e+06
Q15149	PLEC	Plectin	192	3.23316e+06	3.73759e+06	4.24921e+06	4.6719e+06	3.97023e+06	7.15078e+06	4.08336e+06	4.30711e+06	4.69392e+06	5.94982e+06	4.17367e+06	3.23316e+06	3.49189e+06	3.80323e+06	4.08082e+06	3.80926e+06	3.80323e+06	3.49189e+06
P62937	PPIA	Peptidyl-prolyl cis-trans isomerase A	11	5.01879e+06	4.75072e+06	7.09416e+06	4.15321e+06	6.29586e+06	8.24789e+06	3.9567e+06	7.74938e+06	4.74266e+06	7.46184e+06	4.24449e+06	4.66133e+06	3.85731e+06	4.46167e+06	4.15982e+06	1.1214e+07	4.47842e+06	5.12614e+06
P05771	PRKCB	Protein kinase C beta type	25	764223	869264	1.44142e+06	843858	1.0486e+06	1.3255e+06	831327	1.23836e+06	882120	1.07931e+06	774253	790095	742253	799584	846588	1.5161e+06	850295	864729
P20340	RAB6A	Ras-related protein Rab-6A	11	1.10512e+06	1.08321e+06	1.29467e+06	961893	1.07223e+06	1.34999e+06	846557	1.23937e+06	960441	1.08538e+06	915144	952278	824900	845703	802118	1.36329e+06	957142	1.18104e+06
Q9NQC3	RTN4	Reticulon-4	9	924644	449228	2.0741e+06	773295	2.28945e+06	1.66099e+06	774607	1.15228e+06	1.01238e+06	1.8113e+06	644130	665276	798707	732257	1.26725e+06	1.35667e+06	644430	694951
Q99719	SEPT5	Septin-5	12	1.12668e+06	872562	797612	892115	913978	813234	1.08382e+06	809294	1.03482e+06	1.02865e+06	1.04208e+06	990416	925082	1.00883e+06	1.25023e+06	873983	953775	991964
Q14BN4	SLMAP	Sarcolemmal membrane-associated protein	19	562401	515315	560372	579183	488314	533501	648313	482109	610767	494705	493515	557364	586395	623439	558709	415680	570659	563821
P09493	TPM1	Tropomyosin alpha-1 chain	23	1.77595e+06	2.24927e+06	2.04719e+06	1.5803e+06	2.68993e+06	1.57093e+06	1.58851e+06	1.58227e+06	1.58416e+06	2.38132e+06	1.81829e+06	1.66178e+06	1.45253e+06	1.8527e+06	1.63361e+06	2.1802e+06	1.79283e+06	2.93164e+06
P06753	TPM3	Tropomyosin alpha-3 chain	18	835324	1.07008e+06	833825	779664	966324	797701	847424	784560	697839	921357	736480	790836	679769	782264	741387	881701	942936	1.14544e+06
P67936	TPM4	Tropomyosin alpha-4 chain	22	5.62448e+06	7.07819e+06	1.00028e+07	5.18486e+06	1.28847e+07	9.96758e+06	5.32492e+06	8.8309e+06	6.06127e+06	1.00241e+07	4.92168e+06	5.32473e+06	4.35651e+06	5.42243e+06	4.864e+06	8.86447e+06	5.58641e+06	6.65998e+06
O43149	ZZEF1	Zinc finger ZZ-type and EF-hand domain-containing protein 1	38	646742	750326	708348	679986	747252	703135	762863	727132	667037	671655	757954	775051	749577	740612	700016	605601	832545	686402
Q15121-2	A15	Isoform 2 of Astrocytic phosphoprotein PEA-15	6	255297	211658	211416	207575	177563	216487	180802	189566	200914	202637	189665	168562	208982	184961	179749	241014	204048	256610
P04217	A1BG	Alpha-1B-glycoprotein	11	1.13779e+06	1.17155e+06	392105	1.09636e+06	379668	377621	1.19164e+06	384805	873112	416015	1.84265e+06	1.43464e+06	2.01492e+06	1.12693e+06	920203	432042	1.69421e+06	1.0293e+06
P01023	A2M	Alpha-2-macroglobulin	63	1.63729e+07	1.28538e+07	4.56781e+06	1.04277e+07	4.23191e+06	5.15052e+06	1.34749e+07	4.89953e+06	1.04277e+07	5.04201e+06	1.55326e+07	1.34749e+07	1.55326e+07	1.17231e+07	1.39819e+07	4.15884e+06	1.01767e+07	9.38944e+06
Q9H7C9	AAMDC	Mth938 domain-containing protein	4	151712	342139	232168	222498	184901	262354	242872	196030	223158	238777	308265	237353	246872	223281	204567	234279	209926	329387
P49588	AARS	Alanine--tRNA ligase, cytoplasmic	35	1.04639e+06	1.19719e+06	902806	1.07471e+06	923683	944489	1.11732e+06	933851	1.12141e+06	972211	1.08141e+06	1.06901e+06	1.01406e+06	910677	1.01687e+06	939371	1.02437e+06	1.16285e+06
Q9NP58	ABCB6	ATP-binding cassette sub-family B member 6, mitochondrial	8	111445	136386	221856	146780	161611	193938	122542	189484	136305	178698	152741	86320.6	128117	143668	111124	153277	110838	139047
O15439	ABCC4	Multidrug resistance-associated protein 4	18	983782	986026	1.65929e+06	1.15203e+06	1.74135e+06	1.75389e+06	818102	2.29456e+06	1.30496e+06	1.63336e+06	802998	837916	739132	727611	1.13847e+06	1.46388e+06	800668	871612
P61221	ABCE1	ATP-binding cassette sub-family E member 1	13	801307	896066	543425	722350	586598	581586	795796	579284	712747	705024	864647	802575	851859	803198	678793	554290	896066	786581
Q8NE71	ABCF1	ATP-binding cassette sub-family F member 1	11	434633	453886	292392	376748	293625	283711	490837	298895	349666	335132	421225	415082	428894	398304	395942	310125	465305	436607
Q9NUJ1	ABHD10	Mycophenolic acid acyl-glucuronide esterase, mitochondrial	9	3.96536e+06	2.64447e+06	6.74418e+06	2.64925e+06	6.50801e+06	6.20357e+06	2.67359e+06	6.50801e+06	3.0423e+06	6.06176e+06	2.41252e+06	2.65425e+06	3.33492e+06	3.32598e+06	2.94705e+06	4.6593e+06	2.12884e+06	3.04273e+06
Q8NFV4	ABHD11	Protein ABHD11	5	239128	131410	355757	151085	233048	261021	167090	358890	188901	269656	151997	145897	204818	191490	164644	331559	139967	170809
Q96IU4	ABHD14B	Protein ABHD14B	6	421508	489399	475406	414104	483959	440694	399947	414782	442824	454547	493201	454109	418237	489399	383561	388138	426396	461889
O95870	ABHD16A	Protein ABHD16A	16	475761	237513	801766	382814	584221	727025	354316	624912	497960	699981	275294	385844	363656	368436	420047	410543	276810	338702
Q8TB40	ABHD4	Protein ABHD4	2	78761.8	71007.7	215389	86254	198445	214335	72100.4	93125.4	114199	225612	50974.8	80959.1	98602.5	82624.3	117388	104325	79836.9	84301.7
Q8IZP0	ABI1	Abl interactor 1	12	593801	414694	476801	568685	491917	470367	377625	505183	510661	484693	361587	406307	526099	441980	468838	390529	410282	463461
Q9NYB9	ABI2	Abl interactor 2	6	94533.7	148589	107039	102708	92916.7	110582	135682	94606.2	105201	99802.1	128078	120655	106715	136521	97053.3	81979.7	103373	130511
O14639	ABLIM1	Actin-binding LIM protein 1	8	162816	129063	140760	152768	163573	138684	124825	145786	131493	157538	133653	178453	79913.1	136709	158089	149542	211217	149765
Q9P1F3	ABRACL	Costars family protein ABRACL	1	320629	424038	436103	361488	496364	472569	370305	454975	446555	451909	447004	398427	303119	346687	465261	539887	380684	463841
Q15018	ABRAXAS2	BRISC complex subunit Abraxas 2	4	230583	256465	333359	319952	488080	252940	274190	261868	277488	397816	255438	277436	236018	249400	254705	244835	249128	242518
P09110	ACAA1	3-ketoacyl-CoA thiolase, peroxisomal	7	202548	195846	113558	154569	117209	106747	196429	126821	175445	110313	154766	231287	193227	240489	149437	163844	196848	201481
Q13085-4	ACACA	Isoform 4 of Acetyl-CoA carboxylase 1	8	98778.8	119210	118783	120259	107808	111950	120963	97053.3	107945	105116	100530	151665	96432.4	112636	110665	93600.1	123137	100966
Q9UKU7	ACAD8	Isobutyryl-CoA dehydrogenase, mitochondrial	3	213502	68404.4	121029	115465	97125.4	89626.8	120066	105850	125140	95226	76426.3	85648.1	143222	157006	127077	101402	81247.7	78403.2
P11310-2	ACADM	Isoform 2 of Medium-chain specific acyl-CoA dehydrogenase, mitochondrial	14	969853	503950	512412	782179	612744	546010	618425	504897	689634	622026	530263	635656	650402	730452	605188	555566	551699	574565
P16219	ACADS	Short-chain specific acyl-CoA dehydrogenase, mitochondrial	9	253560	112799	222070	174269	249997	223503	137655	193616	191009	220612	116314	195580	178839	164042	174629	169103	126075	133161
P45954	ACADSB	Short/branched chain specific acyl-CoA dehydrogenase, mitochondrial	6	358136	196853	368631	271412	421084	377318	207808	335543	320657	383212	206917	225809	248509	231620	294400	332100	187212	182847
P49748-3	ACADVL	Isoform 3 of Very long-chain specific acyl-CoA dehydrogenase, mitochondrial	25	1.48618e+06	764076	1.4758e+06	1.09055e+06	1.60387e+06	1.65929e+06	925499	1.47891e+06	1.21085e+06	1.4501e+06	810917	1.06424e+06	1.04576e+06	1.02331e+06	1.19384e+06	1.34925e+06	748577	867991
Q15057	ACAP2	Arf-GAP with coiled-coil, ANK repeat and PH domain-containing protein 2	9	338330	427008	259645	310892	260782	241159	305425	260503	331559	239683	327479	360396	346156	340762	315765	242190	337360	341477
Q9BWD1	ACAT2	Acetyl-CoA acetyltransferase, cytosolic	7	3.26952e+06	3.61264e+06	917944	4.56781e+06	2.78445e+06	2.87166e+06	3.81604e+06	5.15052e+06	5.15052e+06	4.42591e+06	3.95294e+06	3.965e+06	3.7076e+06	3.37254e+06	3.81938e+06	5.47217e+06	3.60413e+06	3.76595e+06
Q9H3P7	ACBD3	Golgi resident protein GCP60	8	246334	223366	251311	260782	283794	260309	289317	254700	263484	266821	248932	226321	251341	247557	265133	273035	241356	236787
P53396	ACLY	ATP-citrate synthase	42	1.15792e+06	1.19838e+06	1.79421e+06	1.23931e+06	1.6004e+06	1.62818e+06	1.16299e+06	1.65494e+06	1.34686e+06	1.72757e+06	1.05605e+06	1.50939e+06	1.11543e+06	1.30522e+06	1.40318e+06	1.6004e+06	1.27796e+06	1.00114e+06
P21399	ACO1	Cytoplasmic aconitate hydratase	20	483396	563778	616715	538689	641820	583710	549653	545413	562580	578825	519751	570554	550782	559229	539216	594066	561442	517458
Q99798	ACO2	Aconitate hydratase, mitochondrial	31	1.02047e+06	490744	1.42982e+06	850144	1.64582e+06	1.55436e+06	714016	1.48673e+06	1.10317e+06	1.46836e+06	608462	850158	817562	910573	1.15203e+06	1.68343e+06	509473	722379
Q9NPJ3	ACOT13	Acyl-coenzyme A thioesterase 13	3	172699	247755	271869	185119	296464	283981	221938	276929	234163	273550	246077	237103	214086	215885	265522	268074	244269	260345
O00154	ACOT7	Cytosolic acyl coenzyme A thioester hydrolase	8	383710	456747	372331	429406	355213	332773	616169	336589	420047	350309	454570	367056	516546	445336	379668	410048	486612	435493
Q15067	ACOX1	Peroxisomal acyl-coenzyme A oxidase 1	17	1.54495e+06	1.26695e+06	1.36246e+06	1.55068e+06	1.30255e+06	1.35338e+06	1.38152e+06	1.14402e+06	1.52465e+06	1.27666e+06	1.29268e+06	1.47313e+06	1.30535e+06	1.29566e+06	1.40754e+06	1.27043e+06	1.32754e+06	1.45762e+06
P24666	ACP1	Low molecular weight phosphotyrosine protein phosphatase	6	282378	362723	349534	446555	582089	298710	317881	291778	306467	492873	325011	318573	298607	344123	320969	294120	339122	357902
P11117	ACP2	Lysosomal acid phosphatase	6	241113	265342	372873	288243	419732	420355	296509	516789	324602	421579	278658	266734	279639	327943	276274	455919	287613	294499
Q96GR2	ACSBG1	Long-chain-fatty-acid--CoA ligase ACSBG1	2	215947	155013	373993	229712	239198	369010	195837	230948	172525	332648	167599	195837	191355	148491	257511	289124	196889	315750
P33121	ACSL1	Long-chain-fatty-acid--CoA ligase 1	13	606832	376359	735337	467231	795200	743091	475272	663870	460151	627283	420898	403779	575580	429237	483959	576959	308027	415458
O95573	ACSL3	Long-chain-fatty-acid--CoA ligase 3	8	123199	62669.9	160097	100657	157538	155131	132627	124424	120370	142071	75410.4	81073.3	82523.4	84128.4	105947	139183	77686.7	63037.9
O60488	ACSL4	Long-chain-fatty-acid--CoA ligase 4	13	631589	679290	538287	647763	611476	524332	689287	561228	602256	586991	646901	634478	676186	632655	633330	540354	709155	619157
Q9ULC5-3	ACSL5	Isoform 2 of Long-chain-fatty-acid--CoA ligase 5	12	299471	316092	458343	305423	404094	470113	324465	347272	318611	409829	283027	354019	272481	270505	337166	371565	262562	347898
Q9NUB1	ACSS1	Acetyl-coenzyme A synthetase 2-like, mitochondrial	12	580962	255532	352751	383948	378076	340606	362420	388411	369252	355948	308319	414703	412558	442953	536274	468986	280534	414438
Q9NR19-2	ACSS2	Isoform 2 of Acetyl-coenzyme A synthetase, cytoplasmic	9	749915	663682	606883	675600	620467	590920	706958	538689	644421	563797	691592	715655	759473	720979	601946	590130	715655	688958
P60709	ACTB	Actin, cytoplasmic 1	21	3.52634e+06	1.6979e+07	1.39819e+07	7.36376e+06	1.39819e+07	1.23625e+07	3.91807e+06	1.23625e+07	7.89707e+06	1.11022e+07	1.20005e+07	4.4345e+06	5.9726e+06	3.60242e+06	7.636e+06	1.23625e+07	1.49754e+07	3.68324e+06
Q562R1	ACTBL2	Beta-actin-like protein 2	11	193044	227971	224734	191685	244421	209267	172072	123944	170417	188675	234486	335609	209770	322674	139638	167901	175143	175618
P68032	ACTC1	Actin, alpha cardiac muscle 1	17	1.7404e+06	2.3891e+06	4.72145e+06	1.24334e+06	1.7886e+06	1.58716e+06	2.27741e+06	1.62442e+06	2.7395e+06	3.69694e+06	1.76633e+06	2.47696e+06	1.63612e+06	2.00478e+06	1.64657e+06	2.39411e+06	2.22931e+06	2.00478e+06
O43707	ACTN4	Alpha-actinin-4	46	4.0032e+06	3.18736e+06	1.36622e+06	4.28968e+06	1.1468e+06	1.36246e+06	4.16188e+06	892548	2.94705e+06	1.32456e+06	3.72083e+06	3.72083e+06	4.37578e+06	2.9042e+06	3.68869e+06	962115	3.5801e+06	3.11282e+06
Q9NZ32	ACTR10	Actin-related protein 10	9	212650	245341	199964	236703	200777	182250	246949	185338	209399	178249	248233	223694	212226	222755	232820	179749	223694	227301
P61163	ACTR1A	Alpha-centractin	15	397904	427154	541824	447160	562580	489617	428880	612201	461362	524332	409280	416501	401588	398424	426414	610966	412770	371316
P42025	ACTR1B	Beta-centractin	10	209553	236789	162443	152571	175694	141116	152308	186700	146876	166466	152308	274653	142635	155454	132256	153486	157977	204366
P61160	ACTR2	Actin-related protein 2	15	789395	923839	930522	907753	979451	945827	921688	832869	908648	913766	864584	894509	873849	900939	860810	948670	920134	814546
P61158	ACTR3	Actin-related protein 3	20	2.87146e+06	3.16573e+06	2.96418e+06	3.0423e+06	2.94705e+06	2.82803e+06	2.92006e+06	2.55371e+06	3.06666e+06	2.61319e+06	2.92006e+06	3.00048e+06	3.10623e+06	2.94945e+06	2.79994e+06	2.61319e+06	2.89354e+06	2.98355e+06
Q8TDG2	ACTRT1	Actin-related protein T1	1	73446.1	158827	177283	186901	238659	208240	178497	44495.8	200529	77932.5	150878	162126	113015	115051	169715	60683.2	174238	102068
Q03154	ACY1	Aminoacylase-1	4	168867	192377	213976	204169	395942	213074	192377	238138	209767	235056	202131	181919	206513	182353	175694	183414	192012	199564
P07311	ACYP1	Acylphosphatase-1	3	186660	198728	187580	181890	210283	211167	198447	213594	225335	216836	187815	175157	178206	149682	173094	274942	170757	167236
P14621	ACYP2	Acylphosphatase-2	2	72319.6	145533	140571	142925	139045	143246	132648	134382	144506	133953	170852	143285	155881	126434	153581	151872	165078	159297
Q9NZK5	ADA2	Adenosine deaminase 2	2	42832.2	46531.3	21690.6	48978.4	27767	30628.5	32162.8	39235	40394.4	31031.2	46899.8	54815.4	44921.1	46383.1	45674.6	38993.4	39360.5	35282.8
O14672	ADAM10	Disintegrin and metalloproteinase domain-containing protein 10	22	837581	718975	840641	929464	916085	827036	755373	791106	1.03105e+06	887755	664010	725516	798750	687197	1.0183e+06	676377	740260	769697
Q13443	ADAM9	Disintegrin and metalloproteinase domain-containing protein 9	2	29368.6	17371	42914.5	36101.2	47051.4	37946.1	15843.5	45955.5	34667.7	39682.6	14952.1	14952.1	16550.8	34058.6	31031.2	33599.1	23241.3	21265
O15204	ADAMDEC1	ADAM DEC1	4	265134	216598	251384	217688	233273	272928	213404	256037	252228	245541	263970	267768	239439	274826	212561	207434	205113	259675
O43306	ADCY6	Adenylate cyclase type 6	13	377487	343146	462139	348330	314222	439927	330203	394960	319731	388694	378232	314287	362039	380694	311990	365135	286750	343362
P35611-3	ADD1	Isoform 3 of Alpha-adducin	15	502160	758169	898502	678793	844602	803782	636308	894880	773139	879498	640849	757642	544320	613979	616361	894880	689685	737252
P11766	ADH5	Alcohol dehydrogenase class-3	13	1.02711e+06	1.18857e+06	1.22938e+06	1.13553e+06	1.45909e+06	1.28405e+06	1.0001e+06	1.0099e+06	1.34254e+06	1.21408e+06	1.03673e+06	1.24461e+06	948659	1.07614e+06	997318	1.14402e+06	1.1692e+06	1.32607e+06
Q15848	ADIPOQ	Adiponectin	1	452046	608727	63131.5	383561	33599.1	48179.2	338172	48907.9	279158	47391.3	584256	474449	385130	642379	292624	87372	576944	467907
P55263	ADK	Adenosine kinase	5	77080	91995.4	120116	86507.5	119959	127973	82329	154657	94673.3	121389	82203.8	73224.8	69342.8	78073.2	100051	170278	80466.6	77438.3
Q96SZ5	ADO	2-aminoethanethiol dioxygenase	2	249694	237609	108500	229929	119257	119026	229403	144995	162472	150012	213139	232425	195137	241106	190956	135614	276264	284120
P54922	ADPRH	[Protein ADP-ribosylarginine] hydrolase	6	263089	270732	399241	304558	436103	380932	282142	392805	360875	410543	277772	267867	247474	241401	322576	392805	293594	272449
Q9NX46	ADPRHL2	ADP-ribose glycohydrolase ARH3	2	107243	157750	113818	116861	98674.9	108306	155921	110948	103907	102708	100088	130425	120974	135532	120259	122443	118288	108526
Q16186	ADRM1	Proteasomal ubiquitin receptor ADRM1	4	101596	129444	125490	120203	142926	129117	119544	128033	139230	136028	179674	121701	132230	126410	142684	126317	152839	100713
P30566	ADSL	Adenylosuccinate lyase	11	232425	222606	206757	233814	206278	193992	207711	197582	216626	208556	267715	233198	241503	250398	249417	206757	206602	211822
P30520	ADSS	Adenylosuccinate synthetase isozyme 2	5	139803	151313	257197	174499	258206	280258	146067	156052	192782	230205	174197	157769	148436	139622	169890	213074	147869	156601
P43652	AFM	Afamin	19	1.02692e+06	910090	239198	956721	237580	274519	1.01503e+06	277001	853341	264697	1.00089e+06	779351	1.29787e+06	970754	747691	314222	867577	833938
Q6ULP2-9	AFTPH	Isoform 5 of Aftiphilin	2	396894	263896	200436	406032	254329	180647	300517	232308	338876	264252	285683	326210	316858	330025	233406	191586	270328	294419
P20933	AGA	N(4)-(beta-N-acetylglucosaminyl)-L-asparaginase	2	169271	153527	134569	138490	168955	123261	154875	198808	169993	226520	154216	132528	180666	140814	142155	187919	142870	130018
Q99490	AGAP2	Arf-GAP with GTPase, ANK repeat and PH domain-containing protein 2	5	209125	249148	115176	125875	127344	111642	135655	135714	128841	121174	139750	127034	142079	150649	132045	123774	135058	241948
P52594-4	AGFG1	Isoform 4 of Arf-GAP domain and FG repeat-containing protein 1	4	532744	644547	438158	552400	441771	405216	607903	406496	475968	414104	563878	584800	623357	599177	511282	471217	649105	684163
O95081	AGFG2	Arf-GAP domain and FG repeat-containing protein 2	2	12805.7	16244.3	13406.1	12289.7	12425	10829.8	20263	12095	10992.1	11872.7	15319.1	8520.91	18997.2	17977.9	16446.1	14083.6	14100.3	20263
P35573	AGL	Glycogen debranching enzyme	20	942537	930910	408258	795200	420355	437255	930910	435677	597548	351343	900889	767751	918035	892077	758535	508006	866981	1.01612e+06
Q9UKV8	AGO2	Protein argonaute-2	2	65692.2	69927.2	89626.8	72912.6	84641.9	81845.5	64361.4	85403.4	74297.6	78599.9	62535.4	59606.2	59974.6	80420.6	63393	87895.1	72742.2	68954.6
Q99943	AGPAT1	1-acyl-sn-glycerol-3-phosphate acyltransferase alpha	4	76126.7	39369.1	124424	68900	112071	105392	45957.9	96981.5	85550.4	108713	45957.9	63615.5	56324.4	64425.1	117209	91819.2	39369.1	47083.2
O00116	AGPS	Alkyldihydroxyacetonephosphate synthase, peroxisomal	14	416958	172679	733614	324602	505322	553248	233165	440288	344071	503202	176351	228596	207163	273305	380339	551419	230302	268132
P01019	AGT	Angiotensinogen	6	1.45581e+06	1.33307e+06	272928	1.32306e+06	248794	304819	1.45581e+06	304558	1.04214e+06	293625	1.40711e+06	1.12635e+06	1.98228e+06	1.36246e+06	1.08658e+06	365303	1.1819e+06	1.05994e+06
P23526	AHCY	Adenosylhomocysteinase	17	773239	950496	980866	870941	1.01294e+06	1.04214e+06	828549	1.08555e+06	930522	1.13269e+06	890068	815895	815895	880008	963223	999088	864485	898039
O43865	AHCYL1	S-adenosylhomocysteine hydrolase-like protein 1	16	993963	948257	773139	778826	820488	786469	919629	744536	754273	783960	950107	832969	836078	841139	738555	782903	999756	1.02633e+06
Q96HN2	AHCYL2	Adenosylhomocysteinase 3	15	142690	171410	136594	130042	151274	128901	159813	112378	139913	139517	169528	152033	154926	156997	133865	138511	162476	169658
Q09666	AHNAK	Neuroblast differentiation-associated protein AHNAK	22	459301	483655	453801	369252	406781	535582	299432	453801	407665	419472	313074	573964	351883	476469	396518	385740	299654	294088
O95433	AHSA1	Activator of 90 kDa heat shock protein ATPase homolog 1	11	484935	607009	300018	470565	284440	260618	550058	299871	382935	245242	511988	635815	483103	489466	424472	334053	594981	558929
P02765	AHSG	Alpha-2-HS-glycoprotein	11	1.50612e+06	1.58325e+06	295810	1.41307e+06	260503	320349	1.35898e+06	369838	1.12453e+06	301927	1.50762e+06	1.3682e+06	2.20245e+06	1.52633e+06	1.17502e+06	406781	1.28307e+06	1.29737e+06
Q9NZD4	AHSP	Alpha-hemoglobin-stabilizing protein	2	255397	45566.8	206493	216408	180759	218249	228665	206205	216487	207244	156616	225020	286905	547593	214170	313255	118410	77544.8
Q96BJ3	AIDA	Axin interactor, dorsalization-associated protein	2	224543	201898	223849	220947	246336	245460	244569	311990	207099	292242	243598	190352	300426	211021	194808	340746	222583	240832
O95831	AIFM1	Apoptosis-inducing factor 1, mitochondrial	9	463888	239046	378423	335907	382318	385859	284096	379668	304721	392805	219952	255228	277013	284743	293625	346572	230399	281752
Q12904-2	AIMP1	Isoform 2 of Aminoacyl tRNA synthase complex-interacting multifunctional protein 1	7	333304	369460	380615	350537	422824	395295	343218	518304	338425	433463	358829	359588	322116	315406	370810	529211	344148	333704
Q13155	AIMP2	Aminoacyl tRNA synthase complex-interacting multifunctional protein 2	1	103962	128621	120650	117774	149751	124773	131580	165332	132256	124055	148227	116439	120527	124365	130326	146708	115236	88080.7
O00170	AIP	AH receptor-interacting protein	7	201269	258509	175155	159343	190421	173296	140604	156813	178249	163053	175717	156190	163036	144612	174798	192034	190148	182880
P00568	AK1	Adenylate kinase isoenzyme 1	14	650755	845829	572344	634817	555210	532390	840328	505322	661873	579934	797374	788734	746517	815476	654746	476208	840328	794607
P54819	AK2	Adenylate kinase 2, mitochondrial	13	923156	1.06133e+06	534042	570320	576959	547895	1.04412e+06	652811	462528	511692	926088	1.02601e+06	889199	902283	507519	695098	977488	953171
Q9UIJ7	AK3	GTP:AMP phosphotransferase AK3, mitochondrial	14	1.35428e+06	373313	1.55436e+06	894880	1.32809e+06	1.98107e+06	665246	1.66475e+06	977819	1.40168e+06	550625	970674	878321	1.00359e+06	1.074e+06	2.1508e+06	439714	747129
P14550	AKR1A1	Aldo-keto reductase family 1 member A1	15	601710	640579	831985	633821	911897	882645	640042	855990	680377	916085	718091	706638	707952	605519	707789	946969	720458	623145
P15121	AKR1B1	Aldo-keto reductase family 1 member B1	14	684974	745083	956721	616049	940200	907753	633574	1.07471e+06	776273	1.07806e+06	654451	707220	576428	633923	769915	1.07257e+06	662319	765666
P42330	AKR1C3	Aldo-keto reductase family 1 member C3	5	100810	117437	115779	103046	111642	116861	84876.6	141786	125337	122208	106708	104523	115237	94996.6	92574.9	125757	99078.1	95214.4
O43488	AKR7A2	Aflatoxin B1 aldehyde reductase member 2	7	422824	510191	894880	453801	950919	993966	528900	1.02465e+06	547895	955871	510191	464180	467818	445558	496364	847284	498127	501554
P31749	AKT1	RAC-alpha serine/threonine-protein kinase	10	199628	286459	292199	241884	289860	269911	307171	317559	272712	334749	317338	347976	227860	296049	275986	308268	299943	287940
P31751	AKT2	RAC-beta serine/threonine-protein kinase	11	2.57554e+06	3.11404e+06	732385	2.19611e+06	765587	651584	3.07433e+06	615105	1.98107e+06	702727	2.94531e+06	3.17833e+06	2.73479e+06	2.7165e+06	2.1508e+06	706667	2.88995e+06	2.95061e+06
P13716-2	ALAD	Isoform 2 of Delta-aminolevulinic acid dehydratase	13	782199	747377	753710	717147	894608	781296	1.21268e+06	774100	798968	863181	735956	818499	586068	881030	973874	950495	783876	861516
P02768	ALB	Serum albumin	60	1.26088e+08	1.28703e+08	2.78864e+07	1.28238e+08	3.1287e+07	4.03371e+07	1.2953e+08	3.68966e+07	1.28238e+08	3.1287e+07	1.27998e+08	1.29194e+08	1.26953e+08	1.26953e+08	1.28238e+08	4.56541e+07	1.27711e+08	1.29194e+08
Q13740	ALCAM	CD166 antigen	4	65964.2	91272.6	84031.2	92341.5	74481.7	83691	99095.2	73835.1	81186.9	69117.6	87839.3	83793.9	61916.9	49824.8	89702.2	65903.6	103594	116375
Q8IZ83	ALDH16A1	Aldehyde dehydrogenase family 16 member A1	13	464378	471865	582089	456152	543900	571169	390892	527114	480213	550892	423894	512668	433431	496990	445919	462528	485176	484000
P54886	ALDH18A1	Delta-1-pyrroline-5-carboxylate synthase	7	164922	99583.5	153923	112560	164114	157284	114278	137180	125240	163680	108255	131907	121843	85612.3	125385	161137	90665.1	88115.8
P00352	ALDH1A1	Retinal dehydrogenase 1	10	505580	583907	520976	530033	490700	543900	591772	497960	529211	527114	536271	503513	525570	580053	516789	586991	492895	486336
P51648-2	ALDH3A2	Isoform 2 of Fatty aldehyde dehydrogenase	5	172565	201345	240879	139638	235056	248909	232000	212561	170721	211416	231723	182511	243766	188762	142926	218514	180684	126605
P30038	ALDH4A1	Delta-1-pyrroline-5-carboxylate dehydrogenase, mitochondrial	13	355558	158054	265133	216308	240245	269008	170949	331559	222710	379192	136836	181029	276208	225372	254921	429406	191733	181178
P51649-2	ALDH5A1	Isoform 2 of Succinate-semialdehyde dehydrogenase, mitochondrial	5	336754	148802	543900	343680	594754	544848	238916	428004	447560	536739	195343	200640	214323	246469	384565	552038	165620	221305
Q02252	ALDH6A1	Methylmalonate-semialdehyde dehydrogenase [acylating], mitochondrial	11	333146	217511	357035	315277	409287	383948	280529	357586	360239	394960	280529	243155	330588	290075	335907	448442	231274	240344
P49189-3	ALDH9A1	Isoform 3 of 4-trimethylaminobutyraldehyde dehydrogenase	4	287046	248251	380101	194808	389855	221177	300124	325761	284121	278016	270675	318386	221041	243390	271679	202541	241478	328540
P04075-2	ALDOA	Isoform 2 of Fructose-bisphosphate aldolase A	24	1.517e+06	1.91664e+06	2.51488e+06	1.88082e+06	2.46712e+06	2.33711e+06	1.66475e+06	2.6308e+06	2.09604e+06	2.4238e+06	1.80988e+06	1.91664e+06	1.53896e+06	1.82683e+06	1.79421e+06	2.30297e+06	1.81875e+06	2.10811e+06
P09972	ALDOC	Fructose-bisphosphate aldolase C	15	954684	1.10415e+06	935650	1.05766e+06	1.07041e+06	885024	1.03724e+06	1.35079e+06	957649	1.02996e+06	1.11611e+06	1.12674e+06	846517	1.17641e+06	967119	1.36072e+06	1.17641e+06	1.56913e+06
Q2TAA5	ALG11	GDP-Man:Man(3)GlcNAc(2)-PP-Dol alpha-1,2-mannosyltransferase	1	330098	205406	581586	214653	631142	514218	275169	701938	289804	607496	191280	224509	292904	244172	401574	349666	188300	248251
Q9H553	ALG2	Alpha-1,3/1,6-mannosyltransferase ALG2	4	153374	97633.7	126369	104628	147843	123689	115795	138762	119591	135115	115085	97633.7	123061	100334	108207	122596	107321	139143
P18054	ALOX12	Arachidonate 12-lipoxygenase, 12S-type	28	1.41579e+06	1.55708e+06	1.69718e+06	1.49361e+06	2.12792e+06	1.46388e+06	1.42529e+06	1.9469e+06	1.70248e+06	2.04467e+06	1.33233e+06	1.48392e+06	1.54662e+06	1.741e+06	1.68343e+06	2.12792e+06	1.45502e+06	1.44863e+06
Q96Q42	ALS2	Alsin	1	29700.3	39302.6	39572	28718.5	115106	93708.1	34968	121714	28718.5	87185.9	35702.1	34617	28874.7	26624	161616	60660.2	36928.4	27312.6
P02760	AMBP	Protein AMBP	10	382329	260672	131276	353670	117570	127129	291587	123010	285653	132912	324390	267862	462417	849233	329412	151066	270937	217936
Q01433	AMPD2	AMP deaminase 2	20	956303	1.27331e+06	1.33057e+06	962115	1.37361e+06	1.38002e+06	1.06478e+06	1.55436e+06	1.07471e+06	1.30838e+06	1.01769e+06	1.07376e+06	1.00126e+06	1.02058e+06	979451	1.40754e+06	1.10705e+06	1.18526e+06
P03950	ANG	Angiogenin	2	148900	155126	62138.7	104876	71255.7	74727.3	125825	111693	119153	93717.1	144853	163657	136830	174331	128431	104186	162151	160045
Q15389	ANGPT1	Angiopoietin-1	8	206797	265815	249527	260503	314653	287226	205938	288502	262553	295323	236044	192755	267250	224496	270551	296584	274286	245244
P16157-14	ANK1	Isoform Er13 of Ankyrin-1	34	836577	974730	1.09822e+06	954293	925543	1.02189e+06	971694	1.0442e+06	979451	908648	731851	876233	820873	904759	855238	1.12453e+06	992183	994607
Q9P2R3-4	ANKFY1	Isoform 4 of Rabankyrin-5	12	238507	254204	318611	271552	344625	314826	226465	245242	269008	305423	219678	240448	235158	220924	258465	203731	271028	201046
Q8IV38	ANKMY2	Ankyrin repeat and MYND domain-containing protein 2	8	227412	286763	258776	294796	262714	276732	259736	251874	253055	242296	274653	291112	279386	247779	266305	256709	316890	332938
Q96NW4	ANKRD27	Ankyrin repeat domain-containing protein 27	4	56956	70455.6	54897.6	48491.4	62248.6	61793.4	53499.9	63494.6	54897.6	61210.5	62357	75913.4	63418.6	53249	53230.5	48797.9	37584.2	79585.2
O15084-1	ANKRD28	Isoform 3 of Serine/threonine-protein phosphatase 6 regulatory ankyrin repeat subunit A	10	220058	195913	233273	200777	216308	199964	194345	173839	179749	200777	191762	181229	208578	197282	195022	187442	180245	168248
Q92625	ANKS1A	Ankyrin repeat and SAM domain-containing protein 1A	6	99641.6	123050	176068	137880	177625	149542	112106	173296	140592	159523	111971	111971	122314	120986	134526	210579	118082	113323
Q9NW15	ANO10	Anoctamin-10	4	166620	65699.5	534696	195747	334267	315614	175698	222710	315277	299405	124591	178127	164194	145288	265931	186021	134594	126575
Q4KMQ2-2	ANO6	Isoform 2 of Anoctamin-6	16	333735	278593	510562	331559	418276	396823	301567	483959	380101	483497	301567	310886	348899	336174	392553	369010	306121	310697
P39687	ANP32A	Acidic leucine-rich nuclear phosphoprotein 32 family member A	5	393542	455621	391601	363880	417357	499175	410282	571991	395972	380872	433552	461109	357208	316949	453997	530580	370740	325703
Q92688	ANP32B	Acidic leucine-rich nuclear phosphoprotein 32 family member B	4	149114	118147	152571	111566	130768	148492	138508	173772	112246	145400	126920	152593	166114	157488	153860	160788	137013	103545
P04083	ANXA1	Annexin A1	16	577196	593914	305647	428649	243357	467886	421412	400582	388998	297791	573910	799441	486116	592880	493755	466336	365575	403459
P50995	ANXA11	Annexin A11	19	567006	568523	612744	554699	593203	644421	590211	623691	573653	565743	601131	621193	527474	654102	577912	592557	567628	603835
P07355-2	ANXA2	Isoform 2 of Annexin A2	17	1.22072e+06	1.39046e+06	345496	756680	605188	498641	1.08737e+06	455277	724646	293811	1.27229e+06	1.72984e+06	1.18643e+06	1.38604e+06	876620	402547	1.22211e+06	1.02417e+06
P12429	ANXA3	Annexin A3	20	514203	565958	742234	597548	985902	842858	526089	614378	534042	684012	593136	631776	531550	519913	613735	972211	517852	477678
P09525	ANXA4	Annexin A4	15	375971	400222	372074	357035	474243	476208	339152	417014	393229	359128	378382	372809	522942	415871	345883	537139	372247	347499
P08758	ANXA5	Annexin A5	21	464364	663728	695729	486900	988482	724198	545328	906964	505322	505322	575076	536457	489253	577993	706667	1.13847e+06	565817	615922
P08133	ANXA6	Annexin A6	26	1.26491e+06	1.19002e+06	816828	837521	875357	1.17761e+06	876331	1.59557e+06	857935	807856	973201	1.51478e+06	898628	1.09053e+06	1.04535e+06	1.24188e+06	876331	794547
P20073	ANXA7	Annexin A7	15	395411	526306	524656	502801	622026	586991	519032	681286	517498	583956	477330	482737	444392	474768	489170	672458	495235	496232
Q10567	AP1B1	AP-1 complex subunit beta-1	35	1.56223e+06	1.76113e+06	1.38421e+06	1.34254e+06	1.44595e+06	1.5003e+06	1.67363e+06	1.33862e+06	1.53162e+06	1.37361e+06	1.57396e+06	1.68696e+06	1.48744e+06	1.56223e+06	1.44595e+06	1.08337e+06	1.67363e+06	1.56376e+06
O75843	AP1G2	AP-1 complex subunit gamma-like 2	4	99048.5	96679.9	99898.1	92323	114997	106894	90052.4	78260.9	100558	99024.6	93036.6	100641	86152.9	96612.5	87834.4	59387	88960.1	77123
Q9BXS5-2	AP1M1	Isoform 2 of AP-1 complex subunit mu-1	14	745878	836170	1.07471e+06	910937	1.03409e+06	1.21085e+06	877742	1.07257e+06	898502	995460	812810	939604	733868	803476	929464	873112	849441	727245
P61966	AP1S1	AP-1 complex subunit sigma-1A	3	432967	432092	456966	372331	293811	371565	466575	309015	322824	313761	450609	479944	426247	405365	415632	208486	417025	413426
P56377-2	AP1S2	Isoform 2 of AP-1 complex subunit sigma-2	3	1.70719e+06	1.9447e+06	724198	1.46388e+06	721486	731053	2.12669e+06	695729	1.19066e+06	684819	1.63693e+06	1.796e+06	1.52248e+06	1.70719e+06	1.3885e+06	649738	1.92359e+06	2.17453e+06
O95782	AP2A1	AP-2 complex subunit alpha-1	36	1.54154e+06	1.54821e+06	1.07257e+06	1.48673e+06	1.19657e+06	1.15898e+06	1.57083e+06	1.35709e+06	1.26313e+06	1.1834e+06	1.47761e+06	1.55062e+06	1.48161e+06	1.56713e+06	1.30838e+06	1.0293e+06	1.55734e+06	1.3907e+06
O94973-2	AP2A2	Isoform 2 of AP-2 complex subunit alpha-2	20	115365	124742	117209	127625	127264	128118	148639	134061	118783	129681	130411	108487	173453	140620	111950	114728	151971	160445
P63010-2	AP2B1	Isoform 2 of AP-2 complex subunit beta	34	821423	705535	663870	740665	683235	691718	774747	577675	584221	651226	737453	734895	742257	737048	614378	541824	776397	735634
Q96CW1	AP2M1	AP-2 complex subunit mu	10	563133	497231	546010	524332	543050	576068	518713	559542	556752	558369	456680	540837	480410	527232	521624	450809	527232	425950
P53680	AP2S1	AP-2 complex subunit sigma	3	371599	366538	285617	284440	274089	374814	429334	281137	326797	276835	393340	426571	371599	406997	729243	278497	420668	389197
O00203	AP3B1	AP-3 complex subunit beta-1	21	683879	764666	675600	750718	701938	692498	765892	676377	663429	585812	670691	815938	675200	709393	707187	516789	780497	673510
O14617-5	AP3D1	Isoform 5 of AP-3 complex subunit delta-1	19	444420	485569	524332	543900	595310	566695	515918	503202	527732	508769	441542	521433	456047	501040	483497	517498	504176	449059
Q9Y2T2	AP3M1	AP-3 complex subunit mu-1	10	456510	448423	488243	576959	462528	476675	470423	465261	481279	417796	414693	441915	432286	463323	462139	469551	432775	438508
Q92572	AP3S1	AP-3 complex subunit sigma-1	2	216476	230829	165553	211940	154885	162632	237363	175431	182570	151039	215356	229403	213394	211179	207015	186828	223651	195454
Q9Y6B7	AP4B1	AP-4 complex subunit beta-1	3	77909.3	62420.8	64836	67848.6	75840	64928.6	59752.3	61976.8	68582.1	71971.8	58178.3	58384	45399.4	53814.5	61399.1	40866.3	64457.3	54294.2
Q9UPM8	AP4E1	AP-4 complex subunit epsilon-1	2	100794	98269.1	194435	120370	155426	174269	114717	157538	127704	170278	96766.6	171760	100962	171760	137001	168449	111760	110453
O00189	AP4M1	AP-4 complex subunit mu-1	1	34871.8	41536.2	72640.5	57634.5	66381.5	60790.6	41575.2	68504.6	59852.5	66194.6	44495	42019.2	31930.4	44578.5	58918.9	64518.6	41645.1	35857.1
Q9Y587	AP4S1	AP-4 complex subunit sigma-1	3	55058.9	59981.2	82858.4	76106.6	87707	85403.4	62137.5	82338.7	79948.7	89052.4	70846.5	64150.3	54291.2	48432.5	86254	73501.1	78482.7	52922.8
O14727	APAF1	Apoptotic protease-activating factor 1	7	154841	164897	303108	169623	277285	359128	171920	218514	200247	346959	158681	176895	156910	178586	180465	290451	181029	139542
P02743	APCS	Serum amyloid P-component	6	464348	366420	85238.5	398594	84335.7	122754	403991	101003	228180	87822.9	489729	298271	557127	348609	344398	116676	488315	381317
P13798	APEH	Acylamino-acid-releasing enzyme	16	538713	650107	641033	549164	616715	654746	623856	634817	590577	617716	545919	605482	506801	613534	511039	681286	595053	558694
Q06481	APLP2	Amyloid-like protein 2	8	155885	241991	166466	179522	227931	243177	201577	221450	289442	270374	210754	178493	195473	254529	215047	264836	247059	260914
Q9HDC9	APMAP	Adipocyte plasma membrane-associated protein	10	587172	481286	676932	515818	660808	673348	552503	516490	532972	611476	507521	560390	563761	516265	590920	612744	413320	424326
P02647	APOA1	Apolipoprotein A-I	24	3.46428e+07	2.84217e+07	3.60167e+06	3.1574e+07	3.4729e+06	4.56781e+06	2.98757e+07	3.96204e+06	2.55174e+07	3.17206e+06	2.61287e+07	2.84217e+07	4.08886e+07	3.46428e+07	1.9286e+07	6.35198e+06	2.38303e+07	2.38303e+07
P02652	APOA2	Apolipoprotein A-II	5	1.36001e+06	1.65744e+06	719836	1.75962e+06	693731	718777	1.40718e+06	716450	1.42549e+06	698059	1.67975e+06	1.48336e+06	2.13506e+06	1.83502e+06	1.06638e+06	686930	1.46042e+06	1.06715e+06
P06727	APOA4	Apolipoprotein A-IV	26	3.0763e+06	2.48391e+06	2.46712e+06	2.82803e+06	2.37426e+06	1.8126e+06	2.20745e+06	2.20368e+06	2.24947e+06	2.1508e+06	2.20745e+06	2.51805e+06	3.49245e+06	3.18739e+06	1.96864e+06	2.09604e+06	2.44783e+06	3.11805e+06
P04114	APOB	Apolipoprotein B-100	186	2.41744e+07	2.66206e+07	6.50801e+06	2.78968e+07	6.74418e+06	6.74418e+06	2.41744e+07	6.80586e+06	1.39819e+07	5.98641e+06	2.27446e+07	1.85135e+07	2.41744e+07	1.75633e+07	2.55174e+07	6.80586e+06	2.13323e+07	1.85135e+07
Q0VD83-4	APOBR	Isoform 4 of Apolipoprotein B receptor	12	301486	222946	238394	189484	257003	267933	186454	246196	177283	250111	294029	227206	200189	213565	207434	281513	198654	208315
P02654	APOC1	Apolipoprotein C-I	6	2.11073e+06	2.00692e+06	1.0183e+06	2.33711e+06	943071	952331	2.52902e+06	946969	2.39191e+06	738555	2.94062e+06	2.07905e+06	3.17787e+06	2.47185e+06	3.55433e+06	1.07471e+06	2.30622e+06	1.64115e+06
P02655	APOC2	Apolipoprotein C-II	5	1.71138e+06	1.53615e+06	303687	1.41819e+06	227815	242777	1.45616e+06	385740	1.10469e+06	180647	2.23347e+06	790444	1.55561e+06	1.36794e+06	948670	299026	1.49137e+06	1.25948e+06
P02656	APOC3	Apolipoprotein C-III	5	525784	557360	852284	532614	676932	1.16864e+06	788104	1.56376e+06	555210	643908	943075	603002	801126	747123	1.63994e+06	1.22681e+06	577969	641768
P55056	APOC4	Apolipoprotein C-IV	3	513198	674259	229343	587243	173988	239359	764884	242190	486150	186901	812572	446718	770903	526026	506294	201216	502636	381356
P05090	APOD	Apolipoprotein D	7	618380	432812	135115	418720	159605	121909	417225	165030	309468	123689	594103	341820	527140	467277	429606	171526	378440	308610
P02649	APOE	Apolipoprotein E	17	2.85001e+06	2.55905e+06	922103	2.20368e+06	857935	870941	2.79362e+06	966901	1.99057e+06	848174	3.80796e+06	2.34704e+06	2.9828e+06	2.23966e+06	2.71306e+06	965819	2.79362e+06	2.65545e+06
Q13790	APOF	Apolipoprotein F	4	464893	533215	325761	400582	236573	318359	501110	259043	392553	268577	539082	377994	702571	473448	393229	282242	602790	359880
P02749	APOH	Beta-2-glycoprotein 1	12	1.68997e+06	1.0134e+06	384805	1.19384e+06	453331	436436	1.14517e+06	589083	717000	456966	1.45291e+06	687742	1.58648e+06	1.51808e+06	581131	587243	1.10139e+06	1.11917e+06
O14791-2	APOL1	Isoform 2 of Apolipoprotein L1	9	739706	678909	293486	855990	268646	263706	835367	271552	631936	254084	804418	608692	916870	790864	657376	256389	841585	651052
O95445	APOM	Apolipoprotein M	6	287940	321425	89110.2	311656	86794	80510.6	261408	93409.5	267302	89781.1	348878	260964	406453	325413	195627	89052.4	268251	243091
P05067	APP	Amyloid-beta precursor protein	19	1.92644e+06	2.12896e+06	1.10739e+06	1.47183e+06	1.34925e+06	1.34421e+06	1.8651e+06	1.43326e+06	1.69718e+06	1.59557e+06	1.8206e+06	1.91944e+06	1.7463e+06	1.87349e+06	2.84839e+06	1.63994e+06	1.91345e+06	2.34082e+06
Q9UKG1	APPL1	DCC-interacting protein 13-alpha	16	235737	290635	298123	281033	314448	296196	254868	298331	271679	287971	253346	266779	268906	268662	268385	305423	281718	318811
P07741	APRT	Adenine phosphoribosyltransferase	8	530008	580574	504897	515078	557539	477165	519976	495469	496364	511039	589158	546610	493965	484493	500445	669917	573211	551466
Q5VY43	AR1	Platelet endothelial aggregation receptor 1	10	128988	136252	68338.2	129852	72559.6	84104	118464	71255.7	97746	84031.2	137303	98921	138550	125367	95765.3	69053.6	135574	117301
P10398	ARAF	Serine/threonine-protein kinase A-Raf	10	334751	362738	295615	339235	309647	285213	344081	303687	335132	281513	348751	365183	336175	373373	424156	290233	345928	338645
Q96P48	ARAP1	Arf-GAP with Rho-GAP domain, ANK repeat and PH domain-containing protein 1	30	633116	809531	862310	669917	917944	827825	687892	870315	669030	844602	779954	746717	678003	754468	660808	792696	699775	738722
P48444	ARCN1	Coatomer subunit delta	21	494601	529146	589083	553248	640050	573653	545932	705961	553248	634817	517223	535050	524656	476547	546389	596967	532665	524656
P61204	ARF3	ADP-ribosylation factor 3	8	1.1464e+06	1.15054e+06	1.89548e+06	1.5003e+06	1.96864e+06	1.88809e+06	1.29368e+06	1.89548e+06	1.6895e+06	1.90564e+06	1.11221e+06	1.19377e+06	1.23992e+06	1.51911e+06	1.39811e+06	1.99057e+06	1.23367e+06	1.196e+06
P18085	ARF4	ADP-ribosylation factor 4	10	910612	956342	1.13553e+06	1.01294e+06	1.16078e+06	1.10739e+06	1.04587e+06	1.24578e+06	1.09055e+06	1.1188e+06	961961	942865	943893	914331	1.03571e+06	1.37361e+06	960534	991447
P84085	ARF5	ADP-ribosylation factor 5	9	984300	1.1276e+06	1.51972e+06	1.12141e+06	1.58797e+06	1.58278e+06	1.1287e+06	1.63336e+06	1.23931e+06	1.33057e+06	1.05195e+06	1.15191e+06	1.05718e+06	958339	1.20474e+06	1.86434e+06	1.13606e+06	1.24318e+06
P62330	ARF6	ADP-ribosylation factor 6	7	397791	462198	439563	471217	412134	442824	446201	458709	475406	427205	468655	462198	423945	447021	425405	519275	458847	510389
Q8N6T3-2	ARFGAP1	Isoform 2 of ADP-ribosylation factor GTPase-activating protein 1	3	163123	178501	276518	308005	360875	280835	192950	317756	265931	300875	184414	187952	158901	192554	205398	291652	173277	153975
Q8N6H7	ARFGAP2	ADP-ribosylation factor GTPase-activating protein 2	5	178227	181298	132256	180179	150700	143373	183213	154569	183129	163573	171840	180249	163599	145508	165488	142358	142351	183523
Q9NP61	ARFGAP3	ADP-ribosylation factor GTPase-activating protein 3	6	320181	386906	307065	345496	346787	290233	362783	309647	325761	380615	340037	381348	318596	344412	331168	261891	393381	385708
Q9Y6D6	ARFGEF1	Brefeldin A-inhibited guanine nucleotide-exchange protein 1	26	454056	645886	708914	559070	788391	747691	534485	747691	581131	685419	464363	585786	493049	485161	562580	683235	574224	575074
Q9Y6D5	ARFGEF2	Brefeldin A-inhibited guanine nucleotide-exchange protein 2	17	79975.3	96662.5	117105	94051.1	114816	107662	91834.8	110895	90877.2	107737	83339.2	87758.9	91766.6	84899.3	94973	113143	96393.6	77247.8
P53367	ARFIP1	Arfaptin-1	4	192626	200359	92298.2	175296	115836	98615.8	216617	127973	143037	123598	200359	176892	191026	165499	143832	124312	221727	197373
P05089-2	ARG1	Isoform 2 of Arginase-1	2	663657	547258	377028	577912	362053	399241	438495	263353	439090	352979	645112	678085	561235	666773	628310	303108	657739	512000
Q07960	ARHGAP1	Rho GTPase-activating protein 1	12	605438	743968	812769	695729	831985	781306	673538	664701	764944	883762	638920	647299	647299	668784	745634	665768	654629	585362
A1A4S6	ARHGAP10	Rho GTPase-activating protein 10	16	655353	576954	737170	733614	753063	748561	722128	630655	704491	708914	585669	675716	617047	679402	653802	490380	752484	448899
Q53QZ3	ARHGAP15	Rho GTPase-activating protein 15	3	113206	130920	84695.4	116947	94730.3	84641.9	104780	90444.6	92183.5	88547	108221	121833	108075	105865	104806	90267.4	114226	121702
Q68EM7	ARHGAP17	Rho GTPase-activating protein 17	10	440417	443174	413621	460151	444373	378423	398977	385859	387454	393229	431314	441228	445902	405848	420355	346267	427735	411102
Q8N392	ARHGAP18	Rho GTPase-activating protein 18	32	1.33097e+06	1.35964e+06	1.27402e+06	1.50727e+06	1.31892e+06	1.22099e+06	1.44595e+06	1.21085e+06	1.45909e+06	1.45909e+06	1.36775e+06	1.38409e+06	1.41384e+06	1.43211e+06	1.47183e+06	1.30948e+06	1.34814e+06	1.33097e+06
Q5T5U3	ARHGAP21	Rho GTPase-activating protein 21	7	113323	137406	95443.4	123527	131914	84971.6	91348.7	86637.2	99033.3	113818	154263	112674	166721	194023	92260.4	85288.3	107341	152700
P42331-4	ARHGAP25	Isoform 4 of Rho GTPase-activating protein 25	8	237850	241134	197090	225726	189484	196079	211674	207323	193197	159948	273892	263495	247944	230267	232168	211036	234454	213983
P98171-2	ARHGAP4	Isoform 2 of Rho GTPase-activating protein 4	19	516827	516827	287971	474950	320969	332404	565241	358391	413621	354881	541713	681242	535859	636607	433992	308547	524851	439627
Q13017	ARHGAP5	Rho GTPase-activating protein 5	4	126157	168327	111309	119522	91783.7	104628	141812	88899.2	115703	107808	144295	130365	153757	149909	103689	84772	158187	144936
O43182	ARHGAP6	Rho GTPase-activating protein 6	22	514016	671027	688202	617716	724646	678793	634533	649143	667553	733614	564423	658110	573147	595684	605895	569190	636755	619919
P52565	ARHGDIA	Rho GDP-dissociation inhibitor 1	7	503228	576934	690486	582089	638324	662849	486219	712747	567506	705961	566280	576934	491626	515589	517949	1.00284e+06	544431	637885
P52566	ARHGDIB	Rho GDP-dissociation inhibitor 2	13	1.40146e+06	1.68577e+06	1.85537e+06	1.70248e+06	2.02129e+06	1.84316e+06	1.56116e+06	2.53368e+06	1.78378e+06	1.79976e+06	1.51201e+06	1.53223e+06	1.50101e+06	1.56485e+06	1.49361e+06	2.91821e+06	1.63056e+06	1.63056e+06
Q92888-3	ARHGEF1	Isoform 3 of Rho guanine nucleotide exchange factor 1	14	180187	158318	194901	172162	210579	206067	149364	221608	172864	185658	147850	163906	157529	165001	175296	195022	153465	149566
Q92974	ARHGEF2	Rho guanine nucleotide exchange factor 2	19	291094	331257	323098	289963	347272	330839	262306	399241	317443	330839	296907	263345	277762	262203	287018	285508	266121	266814
Q15052	ARHGEF6	Rho guanine nucleotide exchange factor 6	8	417145	561354	507155	435118	452900	515078	433345	641820	473136	418276	451885	555458	466330	486036	457290	357238	454862	404502
P40616	ARL1	ADP-ribosylation factor-like protein 1	5	310929	280266	317756	274942	359128	323545	247676	329559	283711	340296	263279	246126	227063	195330	316880	288971	267795	316158
P36404	ARL2	ADP-ribosylation factor-like protein 2	4	295638	333542	455617	403121	464069	420668	315127	472155	370810	445298	300571	275697	275492	293137	388411	479618	318610	323689
P36405	ARL3	ADP-ribosylation factor-like protein 3	4	133078	150660	147186	139517	133260	140101	129932	218624	131038	137880	151905	180979	116758	143054	136472	219770	173371	146101
O75915	ARL6IP5	PRA1 family protein 3	5	1.52052e+06	812425	1.72097e+06	1.10966e+06	1.6895e+06	1.53162e+06	1.12479e+06	1.39811e+06	1.38421e+06	1.38002e+06	980813	1.18997e+06	1.16337e+06	1.15448e+06	3.10561e+06	1.10092e+06	944678	1.20523e+06
Q96BM9	ARL8A	ADP-ribosylation factor-like protein 8A	6	219303	157663	161045	211416	176334	155046	163363	182250	161961	156459	149325	159361	163591	164370	149823	171900	161830	216124
Q9NVJ2	ARL8B	ADP-ribosylation factor-like protein 8B	6	623543	415870	552949	509860	500883	530418	468043	515078	471548	491177	385511	442022	450235	508087	572344	582089	451578	574459
Q9NVT9	ARMC1	Armadillo repeat-containing protein 1	1	435292	390208	494785	433992	471057	552949	384798	437255	462877	462528	349847	432710	403287	388356	415432	449381	380994	394630
Q6NXE6	ARMC6	Armadillo repeat-containing protein 6	7	300940	339246	292880	395690	305647	292624	336250	309190	327060	288691	347995	364276	372272	342106	317301	295615	345750	316850
Q8IUR7	ARMC8	Armadillo repeat-containing protein 8	6	121481	120193	133941	112679	152919	144986	100582	127434	117105	145176	128980	104218	125947	106641	117975	105290	108733	98827.6
Q5T2E6	ARMH3	Armadillo-like helical domain-containing protein 3	5	218881	250372	210397	210749	238394	196030	224207	211582	198875	224103	336198	260314	311522	265789	212414	194901	279920	289037
Q9H993	ARMT1	Protein-glutamate O-methyltransferase	4	278333	292432	298895	311412	281137	285947	277379	323098	304558	330067	250455	324107	288802	295228	327501	264935	290045	213018
Q92747	ARPC1A	Actin-related protein 2/3 complex subunit 1A	5	261197	271151	264046	234324	290538	274983	249694	231943	263613	251927	231346	258820	206602	234633	249053	243921	253919	248413
O15143	ARPC1B	Actin-related protein 2/3 complex subunit 1B	16	1.09865e+06	1.34012e+06	1.62087e+06	1.58797e+06	1.66475e+06	1.63336e+06	1.21824e+06	1.54052e+06	1.65929e+06	1.35709e+06	1.1445e+06	1.25064e+06	1.07918e+06	1.11369e+06	1.21408e+06	1.58797e+06	1.2646e+06	1.24511e+06
O15144	ARPC2	Actin-related protein 2/3 complex subunit 2	16	2.85562e+06	3.32495e+06	2.91821e+06	3.7531e+06	2.82803e+06	2.94705e+06	3.41556e+06	2.82803e+06	3.36084e+06	2.39191e+06	3.26768e+06	3.14857e+06	3.37877e+06	3.18217e+06	3.08546e+06	3.13492e+06	3.5292e+06	3.1203e+06
O15145	ARPC3	Actin-related protein 2/3 complex subunit 3	6	668875	581217	537139	684819	573007	546389	645000	557539	692498	509860	585112	543180	681244	568353	606469	481279	577021	509143
P59998-3	ARPC4	Isoform 3 of Actin-related protein 2/3 complex subunit 4	7	2.32331e+06	2.27424e+06	2.87166e+06	2.4238e+06	3.00751e+06	2.79994e+06	2.17254e+06	2.76314e+06	2.79994e+06	2.5935e+06	1.97487e+06	2.13993e+06	1.81424e+06	1.72287e+06	2.26224e+06	3.08546e+06	2.21985e+06	2.12657e+06
O15511	ARPC5	Actin-related protein 2/3 complex subunit 5	10	864814	1.01596e+06	910937	1.04788e+06	920203	864043	877833	840641	1.01224e+06	827825	885945	947452	898493	858750	890374	886512	919001	934455
Q9BPX5	ARPC5L	Actin-related protein 2/3 complex subunit 5-like protein	2	134125	229764	250627	156354	262553	248648	206243	246090	171447	256796	193567	199884	169945	186996	183709	249997	210350	230662
P56211	ARPP19	cAMP-regulated phosphoprotein 19	4	117191	196497	167140	236355	152219	154913	180063	198388	198692	147272	235611	168427	229138	181837	186080	171615	239748	204891
P49407	ARRB1	Beta-arrestin-1	16	614641	823978	592153	729991	601946	589475	747550	600165	783960	554290	845793	813749	679132	740562	583956	618933	841264	939833
Q8N5I2	ARRDC1	Arrestin domain-containing protein 1	2	40541.2	62497.9	76733.3	65815.5	80381.2	72975.7	55461	67809.9	78826.8	70403.8	64355.1	60905.4	47452.6	53081	62550	71653.2	60678.2	55635.2
P15289	ARSA	Arylsulfatase A	5	284065	247760	279711	213074	299026	214412	287186	378076	216836	255345	278585	211578	305740	257145	244656	358726	210018	231047
Q13510-2	ASAH1	Isoform 2 of Acid ceramidase	12	884275	778765	292242	684012	363290	349332	666535	370557	559542	360875	818340	621107	544827	373417	643908	471057	655673	513161
Q9ULH1-2	ASAP1	Isoform 1 of Arf-GAP with SH3 domain, ANK repeat and PH domain-containing protein 1	25	742240	972065	914891	765587	1.04535e+06	1.0099e+06	886722	823078	894880	1.04535e+06	863272	917421	753169	798944	859135	757385	930639	930639
O43150	ASAP2	Arf-GAP with SH3 domain, ANK repeat and PH domain-containing protein 2	28	728938	773101	888694	788391	1.07806e+06	958532	776882	1.06034e+06	891515	1.02031e+06	744836	760766	689870	765338	840641	983710	780047	931627
Q8N9N2	ASCC1	Activating signal cointegrator 1 complex subunit 1	1	159166	139342	293625	179865	304395	271247	163202	272560	218027	244044	181133	157852	131328	225785	284226	269656	163202	167737
Q8N3C0	ASCC3	Activating signal cointegrator 1 complex subunit 3	6	348492	404598	186901	294939	171810	173430	314121	175846	267064	161226	268349	272749	323705	183151	254329	161045	310649	199243
P04424	ASL	Argininosuccinate lyase	14	392603	432762	367965	391198	357800	334707	401796	328803	369518	364691	409469	417862	384691	385163	373071	344071	420596	425467
O95671	ASMTL	Probable bifunctional dTTP/UTP pyrophosphatase/methyltransferase protein	8	316323	385463	227815	328086	175362	175445	226909	272170	235772	202814	326050	385463	236072	344591	254521	218780	268390	366775
O43681	ASNA1	ATPase ASNA1	8	845086	907822	1.5362e+06	893317	1.53162e+06	1.5461e+06	875696	1.22566e+06	1.06034e+06	1.56045e+06	945466	949644	927844	957965	1.09822e+06	1.1398e+06	918554	892643
Q12797	ASPH	Aspartyl/asparaginyl beta-hydroxylase	14	315312	198581	268385	256709	315121	262992	276555	267933	266610	289442	239038	238742	273335	262306	239081	311260	211303	233523
Q9BZE9-2	ASPSCR1	Isoform 2 of Tether containing UBX domain for GLUT4	4	81262.6	128698	115140	115790	110372	120422	130730	116689	102547	105258	118481	99502.5	119562	104676	95354.8	124386	138943	115423
Q676U5	ATG16L1	Autophagy-related protein 16-1	5	149327	181672	162837	190799	187580	176724	154935	153327	167901	206067	171072	161647	173964	187878	155466	151179	206480	153510
Q9NT62	ATG3	Ubiquitin-like-conjugating enzyme ATG3	5	220500	276935	326334	316880	351343	323341	288166	331419	318359	301756	308289	300245	257330	273231	277001	334707	260296	287368
Q96DT6	ATG4C	Cysteine protease ATG4C	1	174625	230170	192233	192034	178432	183919	216420	158239	166330	167845	234971	189517	229366	238078	213074	190177	229636	248110
Q9H1Y0	ATG5	Autophagy protein 5	2	216966	293151	144524	201953	158588	149474	258579	131969	185720	155517	240565	294740	197943	237632	258620	140224	297176	275712
O95352	ATG7	Ubiquitin-like modifier-activating enzyme ATG7	12	381414	379380	330273	326334	328569	308692	364389	321808	329559	316135	360381	380216	361822	327947	347457	321357	356816	359200
Q7Z3C6	ATG9A	Autophagy-related protein 9A	1	262209	202423	620467	247645	455277	555955	315085	476208	306679	464069	275017	289228	235932	286454	333049	506294	286665	310670
P31939	ATIC	Bifunctional purine biosynthesis protein PURH	24	588543	693821	651584	615105	679745	620947	636176	643908	786469	700802	893908	725625	990006	725625	669030	753063	651980	770578
Q8WXF7	ATL1	Atlastin-1	15	458623	243641	586991	355457	631936	512412	339511	583710	426888	496067	321698	310177	350270	370116	414782	567506	279048	382536
Q6DD88	ATL3	Atlastin-3	14	403466	228255	588745	354309	546389	550164	354609	478610	394342	518837	286218	369010	329083	334073	404631	479210	273010	321847
O00244	ATOX1	Copper transport protein ATOX1	2	246483	330448	88991.5	344071	88380.2	102299	280042	88380.2	274639	96623.6	293221	303754	258088	287798	209399	122208	269949	326623
P05023	ATP1A1	Sodium/potassium-transporting ATPase subunit alpha-1	17	443689	441574	321103	374814	255813	322576	433565	330627	352979	291257	447502	388937	481320	433565	325307	262803	461478	391332
P54709	ATP1B3	Sodium/potassium-transporting ATPase subunit beta-3	6	226759	137175	242777	175694	242648	255693	167870	241159	184345	233593	152481	171955	153251	151431	178587	183129	157929	162703
P16615	ATP2A2	Sarcoplasmic/endoplasmic reticulum calcium ATPase 2	40	2.86828e+06	1.09412e+06	2.29456e+06	1.99057e+06	1.99057e+06	2.31887e+06	1.72951e+06	2.04467e+06	1.89548e+06	1.99915e+06	1.40918e+06	2.16055e+06	1.86391e+06	1.87421e+06	1.75389e+06	1.48673e+06	1.30197e+06	1.7775e+06
Q93084-5	ATP2A3	Isoform SERCA3E of Sarcoplasmic/endoplasmic reticulum calcium ATPase 3	35	1.09596e+06	676159	2.15478e+06	920203	1.8126e+06	2.05672e+06	913260	1.99057e+06	1.25852e+06	1.88082e+06	767008	963096	861755	805277	1.05561e+06	1.25852e+06	745532	832922
P98194-7	ATP2C1	Isoform 7 of Calcium-transporting ATPase type 2C member 1	15	201195	203925	240030	205189	209399	237726	254696	168934	233273	219983	225876	213605	284761	226490	205189	140935	225462	232305
P25705	ATP5F1A	ATP synthase subunit alpha, mitochondrial	26	989909	342397	1.50543e+06	790292	1.21408e+06	1.95556e+06	493929	948670	956721	1.60975e+06	412569	668226	514042	444549	853341	747691	408303	419880
P06576	ATP5F1B	ATP synthase subunit beta, mitochondrial	18	1.06632e+06	332392	1.57832e+06	860810	1.40754e+06	1.82136e+06	581266	1.26766e+06	832869	1.6895e+06	412635	707578	568260	459498	856562	1.03898e+06	379625	434137
P36542	ATP5F1C	ATP synthase subunit gamma, mitochondrial	9	320319	88859.1	555566	313255	396823	654176	137713	415432	325307	522547	120797	204530	175047	118600	307375	278258	65760.2	102514
Q9UII2	ATP5IF1	ATPase inhibitor, mitochondrial	2	332708	181105	481787	410048	446880	578425	286448	618933	618057	554699	261050	290941	336850	335952	378968	578825	204351	294327
Q06055-2	ATP5MC2	Isoform 2 of ATP synthase F(0) complex subunit C2, mitochondrial	1	700920	867657	1.90564e+06	615407	1.55068e+06	2.66674e+06	783544	1.76144e+06	1.07086e+06	2.53368e+06	724282	773241	787069	742677	841934	995460	892453	724954
P56385	ATP5ME	ATP synthase subunit e, mitochondrial	2	580507	385894	1.20858e+06	411443	823078	1.58797e+06	412275	1.14988e+06	596212	1.40318e+06	327887	552107	441502	333831	488243	820488	363452	398049
O75947	ATP5PD	ATP synthase subunit d, mitochondrial	10	292573	87214.6	647763	330273	580691	663870	147487	355457	391198	638324	109623	249959	155972	106546	341110	331055	88319	109167
P48047	ATP5PO	ATP synthase subunit O, mitochondrial	8	564359	249392	855238	532390	767415	933851	359909	993966	589083	939371	270970	416698	315742	254849	557539	652811	234451	203296
Q15904	ATP6AP1	V-type proton ATPase subunit S1	2	198877	156263	253733	251384	185920	152413	222205	226960	335543	169103	169155	198130	180713	178379	236009	177283	212035	234316
O75787	ATP6AP2	Renin receptor	1	58486.1	71233.2	111450	99105.9	116552	107737	72815.2	130868	117486	145786	66661.8	59913	85056.5	63066	87372	97549.3	100774	71505.5
Q93050-3	ATP6V0A1	Isoform 3 of V-type proton ATPase 116 kDa subunit a isoform 1	3	180664	159358	341860	209767	257661	153923	207157	251384	256389	189884	141649	182782	154733	179000	247156	169715	196579	190492
P27449	ATP6V0C	V-type proton ATPase 16 kDa proteolipid subunit	1	153724	145771	188901	182795	165677	153435	141515	125385	225235	135565	128171	128654	144143	108619	137752	103547	131874	127111
P61421	ATP6V0D1	V-type proton ATPase subunit d 1	3	146697	104844	175362	140654	144841	141870	135082	162938	137574	131006	119568	171811	127211	120124	124312	198875	123597	148548
P38606	ATP6V1A	V-type proton ATPase catalytic subunit A	23	912176	820718	1.07806e+06	842858	1.06714e+06	1.06034e+06	696669	1.24188e+06	920203	1.03325e+06	698007	777149	638991	683408	904334	1.20858e+06	744355	1.05403e+06
P21281	ATP6V1B2	V-type proton ATPase subunit B, brain isoform	15	392971	402408	446555	388411	427855	406316	438225	474243	425026	471057	411863	384382	411480	405201	426888	474738	424191	394369
P21283	ATP6V1C1	V-type proton ATPase subunit C 1	17	339106	393702	434405	344925	382694	414104	362330	375813	367719	406496	412428	400026	347468	346160	351076	383212	370202	350431
Q9Y5K8	ATP6V1D	V-type proton ATPase subunit D	3	77826.1	132467	64164.7	135565	60457.2	63958.4	119125	65510.2	110366	63131.5	164183	127219	150551	121748	95226	58465	191108	127606
P36543	ATP6V1E1	V-type proton ATPase subunit E 1	6	386219	443012	482370	408258	473951	428358	392088	479618	451909	482758	438394	444261	381575	448147	438158	520976	503293	426092
O75348	ATP6V1G1	V-type proton ATPase subunit G 1	3	74501.4	89488.2	146974	107130	135240	145663	68111.7	153486	131914	134883	99371.9	88499.6	70802.3	86618.8	105341	150522	93161.2	104291
Q9UI12	ATP6V1H	V-type proton ATPase subunit H	9	177182	212477	233048	210283	226052	235469	185579	222415	196999	226470	217696	193288	190289	171676	217280	229343	213131	166671
Q5TC12	ATPAF1	ATP synthase mitochondrial F1 complex assembly factor 1	2	129611	138267	140592	129734	146228	134796	159114	145063	158178	169408	153295	116168	120595	134828	146600	129734	143080	142980
O75882	ATRN	Attractin	10	2.22539e+06	1.95868e+06	388998	1.74836e+06	380101	444022	2.37179e+06	444373	1.72097e+06	423750	2.23588e+06	1.84621e+06	2.55648e+06	2.19105e+06	1.48673e+06	523189	1.89517e+06	1.99071e+06
Q9UBB4	ATXN10	Ataxin-10	7	220912	305461	228180	200914	220612	242296	214502	242534	224304	217830	275760	244104	300124	222016	318985	220612	252761	298581
Q8WWM7-3	ATXN2L	Isoform 3 of Ataxin-2-like protein	5	161583	183099	159684	196030	181259	145400	199645	153127	165332	213761	203623	184575	200635	178793	191884	164363	227658	203623
P25311	AZGP1	Zinc-alpha-2-glycoprotein	14	1.58971e+06	1.28876e+06	267064	1.17137e+06	245959	266025	1.40565e+06	326797	919682	267064	1.40565e+06	1.13344e+06	1.86398e+06	1.28004e+06	1.0293e+06	368631	1.50495e+06	1.17939e+06
P20160	AZU1	Azurocidin	2	830579	473816	394627	654746	350537	1.2972e+06	384319	688202	461894	539216	1.04109e+06	1.07385e+06	586711	613967	776273	1.16078e+06	387489	499019
P61769	B2M	Beta-2-microglobulin	3	164534	177557	197757	178432	156813	168449	142853	150700	132364	149751	154505	161849	150731	178752	128979	167378	148267	162883
P15291	B4GALT1	Beta-1,4-galactosyltransferase 1	2	111295	96651.5	94250.6	117388	103547	133119	85328.2	129117	99105.9	127704	84644.1	78767.4	93484	101017	88991.5	137507	85371.8	121040
Q9NWV8	BABAM1	BRISC and BRCA1-A complex member 1	5	131958	141582	220612	125098	109569	125757	119886	91355.6	98540.3	107192	121681	122656	132052	115439	155426	245541	135886	128989
Q9NXR7-1	BABAM2	Isoform 1 of BRISC and BRCA1-A complex member 2	4	70440	114759	95713.5	82406.2	91470.5	90877.2	104811	90556.3	88738.2	84170.1	102668	109156	112215	93512.9	88345.5	90363.6	121409	119450
O95816	BAG2	BAG family molecular chaperone regulator 2	4	86205.6	88820.8	88203.3	90701.5	105947	85092.2	89166.1	88686.8	86794	89626.8	82491.5	79080.9	101420	96561.2	78599.9	91436.8	88620.6	71658.7
Q9UL15-2	BAG5	Isoform 2 of BAG family molecular chaperone regulator 5	2	66661.4	88234	83889	97925.3	101019	85041	79783.4	93297.6	89533.8	97311.8	75779.5	75638.5	81103.9	69453.3	71805.1	90399.9	83263.9	93337.3
P46379-3	BAG6	Isoform 3 of Large proline-rich protein BAG6	10	194051	195075	172235	179749	185720	169103	220903	178698	186654	167653	200794	190232	221519	203010	195747	156459	197273	191506
O75531	BANF1	Barrier-to-autointegration factor	1	19135.7	35833.6	17219.8	45380	13135.5	24885.1	33270.6	22511.3	21887.7	21364.3	44205.5	26086.8	35579.9	31191.9	53528.1	21783.1	42807.6	51289.3
Q8NDB2	BANK1	B-cell scaffold protein with ankyrin repeats	11	391493	453948	445919	460790	467606	467231	441861	449381	471828	426414	583386	473826	512891	465007	410937	369252	454580	504351
P80723	BASP1	Brain acid soluble protein 1	1	50772.7	58195.4	28403.7	34893	29498.3	57159.7	58195.4	38353	28710.8	28004.5	72381.5	90686.3	56101.3	73630.3	50972.1	59146.2	47878.2	53543
Q07812-2	BAX	Isoform Beta of Apoptosis regulator BAX	5	130561	149570	159016	142071	160603	161692	130561	162203	140101	154248	142145	153962	129198	118353	141361	213344	150586	166528
Q9UHQ4-2	BCAP29	Isoform 2 of B-cell receptor-associated protein 29	6	207382	96880.5	243564	153327	232308	151085	158551	102152	178698	156354	136704	154883	171930	179972	173039	142609	123874	163132
P51572-2	BCAP31	Isoform 2 of B-cell receptor-associated protein 31	11	740887	464456	1.1398e+06	580348	932080	613735	429749	599134	687005	727025	547491	468826	463298	745329	699981	603773	667409	424834
P06276	BCHE	Cholinesterase	3	242707	276002	62455.2	364203	64071.5	66846	310640	61562.2	205189	56400.3	363596	293472	526929	293696	233730	62804.1	314440	272053
Q07817	BCL2L1	Bcl-2-like protein 1	2	534715	537622	618933	616715	656185	553762	508869	699378	617716	600165	469952	477018	512290	459541	503202	619713	539017	551298
P11274	BCR	Breakpoint cluster region protein	11	222612	239906	135382	190177	146346	134297	248183	142781	170804	173687	260272	209567	230583	242302	154326	124895	218003	211007
P23560-4	BDNF	Isoform 4 of Brain-derived neurotrophic factor	4	136815	114420	147574	145219	217697	143355	132197	199573	185256	223723	185226	133232	168318	131061	167560	150224	123845	132459
Q14457	BECN1	Beclin-1	3	67631.4	94375.7	55399.5	64225.1	54170.4	46648.4	84028.5	46020.3	64424.3	79050	77198.6	79068.9	88380.2	72450.3	48978.4	48417.3	89039.9	89773.2
O15155	BET1	BET1 homolog	2	27927.8	22994.5	37574.9	53676.8	37946.1	36208.6	32278.2	97846.4	30935.4	60273.3	19995.8	23312.2	27623.4	27234.5	31154.8	66501.7	26169.9	32278.2
P21810	BGN	Biglycan	2	33673.4	33494	40018.3	44882.8	28638.7	47557.5	33951.2	41655.9	54688	55024.4	34605.5	34140.9	36882.6	30735.6	41400.7	33057.3	40707.8	54549.5
Q8TD16-2	BICD2	Isoform 2 of Protein bicaudal D homolog 2	15	301564	324083	369010	331055	388411	370051	325578	428358	374814	415432	328839	312072	423663	334626	351343	431640	268876	344463
P55957-2	BID	Isoform 2 of BH3-interacting domain death agonist	6	476564	467986	350690	438158	410543	438158	544466	343884	503202	381165	588531	518448	532890	505070	451149	425654	540334	554442
Q9UBW5	BIN2	Bridging integrator 2	20	1.15504e+06	1.62437e+06	982232	2.29456e+06	944489	922103	1.59875e+06	1.02709e+06	1.63994e+06	911897	2.19303e+06	1.67346e+06	1.83848e+06	1.50072e+06	1.43833e+06	990463	1.80399e+06	1.87379e+06
Q13867	BLMH	Bleomycin hydrolase	12	1.50015e+06	1.88673e+06	1.71375e+06	1.63994e+06	1.98107e+06	1.79976e+06	1.85261e+06	2.94705e+06	1.6154e+06	1.87349e+06	1.98745e+06	1.87232e+06	1.71722e+06	1.80683e+06	1.62818e+06	3.36084e+06	1.92739e+06	2.02318e+06
Q6QNY0	BLOC1S3	Biogenesis of lysosome-related organelles complex 1 subunit 3	3	70634.7	100274	128359	108713	126317	116259	81838.5	98024.4	120572	132125	88625.1	96735.6	119129	87255.4	102789	114816	74741.8	99816.6
Q9NUP1	BLOC1S4	Biogenesis of lysosome-related organelles complex 1 subunit 4	2	146314	182661	156601	138417	171900	162551	184085	148935	138511	162203	150700	138788	191127	184980	119308	142861	167785	156781
Q8TDH9	BLOC1S5	Biogenesis of lysosome-related organelles complex 1 subunit 5	1	120082	146865	172162	153127	182957	153599	135582	145176	126442	160861	126144	129406	112576	131740	113487	183518	132744	128120
P53004	BLVRA	Biliverdin reductase A	14	581485	680080	839669	747691	977819	870315	720903	864043	778212	891515	692727	714250	634897	663306	723244	950919	660652	714250
P30043	BLVRB	Flavin reductase (NADPH)	6	180232	151451	341508	189701	270233	347771	219991	305821	205877	294939	168049	192185	242236	336021	204883	387866	170122	169900
Q12982-2	BNIP2	Isoform 2 of BCL2/adenovirus E1B 19 kDa protein-interacting protein 2	4	196705	139835	718953	270374	740157	671803	189787	515818	349942	669030	124490	142354	124317	157544	538287	610660	135866	126377
Q9H3K6	BOLA2	BolA-like protein 2	3	616471	743783	252228	384805	269944	287018	417165	287018	427448	285617	701444	586284	531300	426949	369010	230948	500113	622865
P30086	BP1	Phosphatidylethanolamine-binding protein 1	8	1.09334e+06	1.166e+06	777447	891515	783960	777447	1.05276e+06	963223	885004	799594	1.18864e+06	1.08424e+06	1.00078e+06	1.00337e+06	896041	923683	1.08917e+06	1.1525e+06
P07738	BPGM	Bisphosphoglycerate mutase	6	203502	138843	168834	173162	125875	162938	173070	156179	152828	135714	164899	157312	239238	349314	158472	205189	132073	153802
P15056	BRAF	Serine/threonine-protein kinase B-raf	3	654146	965076	194514	1.0442e+06	131554	140521	870786	169715	600165	147948	758308	714214	787689	852466	1.52465e+06	393987	787689	894032
P46736	BRCC3	Lys-63-specific deubiquitinase BRCC36	3	66894.7	88355	82921.7	84170.1	99366	85014.2	83506.6	73591.5	93520.6	94399.9	80376.7	71570.2	76664.2	76794.8	83228.5	84695.4	75576.2	76986.3
Q8WUW1-2	BRK1	Isoform 2 of Protein BRICK1	6	354777	457729	720336	329559	684819	666646	471698	696685	409287	589083	336726	483175	384889	368308	569190	475968	465183	380027
Q5VW32	BROX	BRO1 domain-containing protein BROX	7	325980	324992	555955	389855	566161	571618	390755	508006	411699	481036	330087	383155	371278	326611	386671	428358	352115	368733
Q9NW68-3	BSDC1	Isoform 3 of BSD domain-containing protein 1	4	191816	131343	147441	157401	150336	126651	150681	150855	139434	143037	147318	136600	156782	138767	138511	134724	145086	156782
P35613	BSG	Basigin	7	175936	142480	290848	195197	249350	281655	143707	287512	193098	258036	155816	155183	156334	145905	170417	277285	148613	189623
P43251-2	BTD	Isoform 2 of Biotinidase	4	322612	367895	423750	360068	355948	435454	427083	567506	360068	390103	435813	378597	437555	414071	430577	492873	399352	374644
Q96K17	BTF3L4	Transcription factor BTF3 homolog 4	2	72660.1	91061.7	81140.7	98540.3	102708	91355.6	93457	97206.5	97482.9	82284.8	87456.5	92467.7	83421.8	84762.2	85999	106093	87252.1	69074.7
Q06187-2	BTK	Isoform BTK-C of Tyrosine-protein kinase BTK	30	908858	1.22442e+06	1.34925e+06	1.00284e+06	1.27043e+06	1.24578e+06	1.16341e+06	1.22938e+06	1.10092e+06	1.371e+06	1.01811e+06	1.20033e+06	915642	1.00047e+06	960165	1.13079e+06	1.22442e+06	1.14249e+06
Q7L1Q6-3	BZW1	Isoform 3 of Basic leucine zipper and W2 domain-containing protein 1	13	912530	1.04186e+06	1.28405e+06	1.09822e+06	1.33057e+06	1.20474e+06	1.03741e+06	1.15695e+06	1.05413e+06	1.22099e+06	953633	967772	1.07003e+06	969407	1.05767e+06	1.13269e+06	1.02374e+06	1.00211e+06
Q9Y6E2	BZW2	Basic leucine zipper and W2 domain-containing protein 2	15	392143	396772	314826	370557	346572	306467	360309	333495	368631	345496	402121	369742	383270	345310	361488	342590	379052	378697
Q9H0W9	C11orf54	Ester hydrolase C11orf54	5	254646	271819	273035	227343	301927	240879	296824	266204	289124	285213	273028	261077	259628	247774	246518	353263	258098	254365
Q9H3H3-3	C11orf68	Isoform 3 of UPF0696 protein C11orf68	3	83923.3	96925.2	104410	99802.1	106146	92670.6	67325.7	82517.1	93125.4	101529	98208.2	86368.2	82119.7	89492.2	90556.3	104876	92456.8	111568
Q9HB07	C12orf10	UPF0160 protein MYG1, mitochondrial	3	261972	237034	108796	276130	115557	113939	232038	115779	220612	112841	214337	258184	230358	262857	251311	139434	279149	236619
Q8N910	C15orf56	Putative uncharacterized protein C15orf56	1	1.22464e+06	1.75866e+06	1.98107e+06	1.37573e+06	3.60167e+06	2.53368e+06	1.443e+06	3.51818e+06	1.5362e+06	1.569e+06	1.19526e+06	1.29614e+06	1.01383e+06	1.443e+06	1.71375e+06	3.78106e+06	1.42265e+06	1.90079e+06
Q9HAS0	C17orf75	Protein Njmu-R1	2	421205	359447	159948	300668	159154	155517	340936	159079	234807	192690	351300	355265	344304	328253	238938	141192	377360	363665
Q9H425	C1orf198	Uncharacterized protein C1orf198	7	98136.9	86370.3	94465.1	92842.1	86731.5	96512.8	87620.3	105392	87822.9	95612.3	74757.8	86128.5	85887	85678.1	93023.5	88094.5	91995.1	117908
Q9BV19	C1orf50	Uncharacterized protein C1orf50	2	27262	49015.9	34513.5	33229.3	35464.9	38353	31706.9	33721.3	35124.3	31747.9	48258.4	46855.6	40144.8	38067.7	28529.6	41714.9	41738	50401.7
P02745	C1QA	Complement C1q subcomponent subunit A	1	914443	717950	220074	605895	226182	201333	528810	231957	428004	232441	660401	628248	709778	594959	553762	239081	608891	749053
P02746	C1QB	Complement C1q subcomponent subunit B	4	1.07717e+06	1.28919e+06	228016	1.05195e+06	201655	225335	1.27019e+06	213074	755183	215721	1.24464e+06	1.19244e+06	1.38266e+06	1.0918e+06	1.0442e+06	208808	1.28011e+06	1.2987e+06
Q07021	C1QBP	Complement component 1 Q subcomponent-binding protein, mitochondrial	5	305712	100598	475968	155258	375813	442229	152886	381165	247156	388138	129938	163221	180078	195957	238138	589475	107070	154564
P02747	C1QC	Complement C1q subcomponent subunit C	5	512072	546389	339784	546010	357238	357800	493582	384991	403842	371417	464003	531668	517389	481747	358106	384991	551448	537681
P00736	C1R	Complement C1r subcomponent	16	1.08376e+06	1.09705e+06	247156	1.1864e+06	273292	272170	1.29454e+06	319908	761748	247156	1.21403e+06	1.1339e+06	1.37539e+06	1.08376e+06	1.02465e+06	301756	1.25709e+06	976206
P09871	C1S	Complement C1s subcomponent	14	622232	579617	167845	632402	171072	205760	668700	173571	457813	181075	764713	600342	889822	599508	610018	202156	648988	521651
P06681	C2	Complement C2	16	545145	703720	193359	517498	167775	215721	565405	197405	378968	183709	545145	411956	769806	527618	397459	254521	727197	456031
Q9GZN8-2	C20orf27	Isoform 2 of UPF0687 protein C20orf27	2	58144.2	59261	99033.3	77073.8	90877.2	67809.9	59016.8	94145.6	57562.7	88436.5	74829.8	70837.8	82091.7	60270.1	65305.8	146228	67839.7	98844
O14523-2	C2CD2L	Isoform 2 of Phospholipid transfer protein C2CD2L	5	108747	80506.5	163152	104186	135517	154569	106280	123822	109312	155046	101512	111286	96253.7	101380	118537	117209	64474.3	118756
Q9BSF0	C2orf88	Small membrane A-kinase anchor protein	5	233329	207856	247917	219559	256796	317301	262940	337166	237166	290233	202091	211146	181096	183275	212796	258776	277383	239936
P01024	C3	Complement C3	96	1.45335e+07	1.54471e+07	5.80322e+06	2.16378e+07	5.98641e+06	6.50801e+06	1.9286e+07	6.35198e+06	1.23625e+07	5.60137e+06	1.9286e+07	1.63052e+07	1.9286e+07	1.63052e+07	2.16378e+07	7.36376e+06	1.54471e+07	1.54471e+07
P0C0L4	C4A	Complement C4-A	63	8.53242e+06	9.01744e+06	3.55433e+06	5.80322e+06	3.32959e+06	3.60167e+06	4.04725e+06	2.64925e+06	4.89953e+06	3.68869e+06	5.29644e+06	3.21839e+06	5.90807e+06	5.90807e+06	5.67522e+06	2.87166e+06	5.45104e+06	4.36296e+06
P0C0L5	C4B	Complement C4-B	63	578035	664605	121970	554290	118431	142861	1.01656e+06	125490	376452	137574	785493	591153	973035	849485	593203	125061	964166	583774
P04003	C4BPA	C4b-binding protein alpha chain	19	1.39034e+06	1.36192e+06	502801	1.38002e+06	458709	545413	1.41193e+06	448798	1.16078e+06	541412	1.67398e+06	1.29868e+06	1.94328e+06	1.32364e+06	1.20858e+06	488785	1.51057e+06	1.29868e+06
P20851	C4BPB	C4b-binding protein beta chain	5	623893	633599	344625	527732	332100	309920	574339	310125	488785	303108	615078	532483	716301	644930	391198	439927	682388	609507
P01031	C5	Complement C5	40	2.49932e+06	2.54683e+06	962115	2.46712e+06	1.08881e+06	1.06281e+06	2.46302e+06	1.19384e+06	2.19611e+06	1.10739e+06	2.38126e+06	2.02833e+06	3.00512e+06	1.95011e+06	2.31887e+06	1.08555e+06	2.54683e+06	2.01578e+06
A6NDU8	C5orf51	UPF0600 protein C5orf51	2	52146.6	63621.3	70250.2	78675	76106.6	62370.7	59954.4	74123.7	81762.1	74727.3	64349.6	60496.4	62705.1	48983.6	71411	80475.2	73445.5	66267.1
P13671	C6	Complement component C6	19	717643	773139	258036	601946	203997	202156	705098	207708	513665	215389	695086	589085	999536	715629	530033	242296	774587	706336
P10643	C7	Complement component C7	21	1.11158e+06	1.08822e+06	262992	848174	248006	337166	1.03028e+06	341508	736317	278258	1.07406e+06	1.1832e+06	1.48006e+06	1.00056e+06	797549	374814	990050	798078
P07357	C8A	Complement component C8 alpha chain	11	680130	645519	259462	621608	256709	244112	713714	279510	532390	241327	713714	548963	792395	604425	545413	317919	699434	575363
P07358	C8B	Complement component C8 beta chain	13	537284	502992	187834	508769	177806	193815	550065	186123	426414	172732	557515	482236	681931	560120	437255	213594	563850	502992
P07360	C8G	Complement component C8 gamma chain	5	730965	621739	182511	859135	202921	201000	711309	261891	541412	208808	687664	1.26679e+06	820305	1.1426e+06	684012	249527	681634	574754
P02748	C9	Complement component C9	18	781921	702180	313002	904334	281960	278258	778759	277857	566161	293181	825484	733425	1.08768e+06	844338	831985	343477	932186	700949
Q5T6V5	C9orf64	Queuosine salvage protein	3	111102	170458	150522	133733	176910	191685	142842	165181	138138	136904	135906	162013	133227	148959	163152	158089	138313	138178
P00915	CA1	Carbonic anhydrase 1	11	638311	391205	1.33626e+06	631142	575097	1.1398e+06	458746	1.07806e+06	586991	969962	452256	445399	655849	1.67089e+06	728344	1.11245e+06	424853	337416
Q8N1Q1	CA13	Carbonic anhydrase 13	6	308990	328336	188215	313544	204476	216308	318749	199755	284583	225099	335759	305103	311157	321708	285508	236282	329180	325462
P00918	CA2	Carbonic anhydrase 2	13	1.59742e+06	1.86732e+06	4.28968e+06	2.15478e+06	4.11849e+06	3.88795e+06	1.46831e+06	3.68869e+06	2.89354e+06	3.81938e+06	1.50182e+06	2.21332e+06	1.98553e+06	3.5594e+06	2.76314e+06	4.07841e+06	2.08087e+06	1.87314e+06
Q9Y376	CAB39	Calcium-binding protein 39	16	809074	884993	848174	781306	904334	837521	895011	871979	825927	855990	844419	928800	775218	841633	785660	855238	934999	959235
Q9HB71	CACYBP	Calcyclin-binding protein	10	474085	591952	611476	541412	643363	607496	568589	695098	532614	710644	584765	499811	537388	500867	502136	827825	549744	546699
P27708	CAD	CAD protein	20	399969	451313	602256	440288	577675	590577	416823	633330	499609	592153	426314	434682	402118	428014	462877	527114	397731	405727
Q9P1Z2	CALCOCO1	Calcium-binding and coiled-coil domain-containing protein 1	16	870831	1.22342e+06	552400	991364	685419	582913	1.08689e+06	622779	799594	632402	988676	1.01503e+06	927604	860046	831017	563797	1.1719e+06	1.40273e+06
Q8N5C1	CALHM5	Calcium homeostasis modulator protein 5	1	20610.4	18469.2	34989.8	18448	29360.1	21426.7	24609.8	22436.6	34597.3	28403.7	18896.8	33600.2	22179.4	20739.5	29360.1	28004.5	30861.1	25390.2
P0DP25	CALM3	Calmodulin-3	10	1.79686e+06	2.99904e+06	4.42591e+06	2.89354e+06	4.89953e+06	3.81938e+06	2.55179e+06	5.04201e+06	3.00751e+06	4.15884e+06	2.67652e+06	2.68692e+06	1.97082e+06	2.48462e+06	2.19611e+06	7.17461e+06	2.52628e+06	2.58853e+06
P27797	CALR	Calreticulin	19	1.27173e+06	1.61632e+06	1.82136e+06	1.62087e+06	2.09604e+06	1.90564e+06	1.49084e+06	2.06804e+06	1.51481e+06	2.09604e+06	1.50666e+06	1.45449e+06	1.24337e+06	1.42885e+06	1.5111e+06	2.66674e+06	1.51331e+06	1.98947e+06
P16284	CAM1	Platelet endothelial cell adhesion molecule	29	1.03545e+06	467036	1.62818e+06	763631	1.24578e+06	1.72757e+06	670483	1.545e+06	835536	1.6154e+06	535801	628390	616071	643037	798405	1.48238e+06	509945	702302
Q14012	CAMK1	Calcium/calmodulin-dependent protein kinase type 1	11	1.17551e+06	1.10393e+06	1.20474e+06	1.22566e+06	1.1418e+06	1.1468e+06	1.09833e+06	1.35338e+06	1.26766e+06	1.13079e+06	1.20569e+06	1.10144e+06	1.14351e+06	1.71467e+06	952331	1.47891e+06	1.04995e+06	1.1417e+06
Q13555-6	CAMK2G	Isoform 6 of Calcium/calmodulin-dependent protein kinase type II subunit gamma	7	118114	146418	207575	159523	188448	172162	168869	157401	176394	195318	119971	157616	132080	113775	168047	122537	163210	128462
P49913	CAMP	Cathelicidin antimicrobial peptide	2	117686	36247.6	50416.6	57159.7	44803	177952	37069.5	32375	48491.4	41966.6	58178.6	109297	51625.4	54552	63885.1	54280.8	29158.8	53204.2
Q86VP6	CAND1	Cullin-associated NEDD8-dissociated protein 1	40	1.55304e+06	1.80731e+06	1.76725e+06	1.74135e+06	1.84744e+06	1.80466e+06	1.80091e+06	1.99915e+06	1.74836e+06	1.70248e+06	1.57662e+06	1.84397e+06	1.61023e+06	1.6991e+06	1.74135e+06	1.75389e+06	1.77353e+06	1.56228e+06
P27824-2	CANX	Isoform 2 of Calnexin	21	966843	437846	1.545e+06	708914	1.30948e+06	1.64582e+06	596346	1.34925e+06	952331	1.50727e+06	485292	541892	685923	510071	791106	1.44357e+06	458657	537391
P40121	CAPG	Macrophage-capping protein	5	211827	164902	121389	146089	131006	222614	136583	212796	164363	129411	170631	227543	154947	150739	174499	246090	146230	122458
P07384	CAPN1	Calpain-1 catalytic subunit	35	2.1259e+06	2.64197e+06	3.68869e+06	2.37426e+06	4.02268e+06	3.63366e+06	2.67639e+06	3.60167e+06	2.98427e+06	3.55433e+06	2.08051e+06	2.60604e+06	2.25588e+06	2.44845e+06	2.74254e+06	3.17206e+06	2.42379e+06	2.44845e+06
P17655	CAPN2	Calpain-2 catalytic subunit	10	677561	770472	745634	1.12852e+06	1.32306e+06	520425	685833	588010	645994	1.15448e+06	671588	722736	674748	733107	542319	550164	725042	747037
Q9Y6W3	CAPN7	Calpain-7	4	159466	162034	241159	202814	246518	228373	159466	169623	218780	206770	149648	128255	64808.9	164156	202541	208041	154118	133273
P04632	CAPNS1	Calpain small subunit 1	9	270119	369259	333633	305006	366830	317919	347133	362504	346959	337166	322066	366940	319244	351277	342148	356757	357745	339001
P52907	CAPZA1	F-actin-capping protein subunit alpha-1	12	1.10398e+06	1.30899e+06	809593	1.14402e+06	896041	707187	1.07975e+06	726220	931383	793821	1.11717e+06	1.09943e+06	1.19197e+06	1.13356e+06	914891	888694	1.26013e+06	1.18029e+06
P47755	CAPZA2	F-actin-capping protein subunit alpha-2	12	522371	678619	793821	599134	785660	769915	644006	658257	654746	759210	614071	600801	574924	580239	571169	781306	667944	690849
Q5EG05	CARD16	Caspase recruitment domain-containing protein 16	2	287940	314973	297279	312794	328793	380017	307927	346778	338285	313326	305288	341695	268161	270262	281376	356598	275826	303904
Q9Y2V2	CARHSP1	Calcium-regulated heat-stable protein 1	3	280299	346037	239683	282476	267302	255813	321680	305423	285947	247764	365498	392173	340383	386688	182511	273436	351982	997831
Q86X55	CARM1	Histone-arginine methyltransferase CARM1	4	211036	254384	220287	191154	230358	224433	222544	220391	201815	222614	241613	228116	215432	242873	208882	234807	244688	230927
Q5VZK9	CARMIL1	F-actin-uncapping protein LRRC16A	6	344926	336811	361071	310125	484337	341110	325744	513204	239198	344071	302907	386340	367846	317396	287768	366830	315995	356994
P49589-3	CARS	Isoform 3 of Cysteine--tRNA ligase, cytoplasmic	14	940649	1.12552e+06	520690	885004	508006	504897	1.00706e+06	580691	822038	485578	1.04289e+06	970585	980146	974793	755183	588010	1.00706e+06	1.08924e+06
P42574	CASP3	Caspase-3	8	362109	554627	577912	451446	570320	488785	399899	576068	505939	533576	423681	383242	415980	345719	432515	441410	493437	490675
P49662	CASP4	Caspase-4	5	621443	654288	449154	619713	451909	517119	505628	397078	564622	509482	694656	510295	484035	795791	519275	403121	524700	765557
P55212	CASP6	Caspase-6	8	207967	250785	258465	234807	277001	243881	226199	213344	238777	231765	233760	223613	214305	219784	222415	261021	232320	284786
P55211	CASP9	Caspase-9	2	66590.7	90103.1	112620	87320.3	111450	110366	103269	127028	101888	132045	74981.2	57816.1	96844.2	87746.6	97549.3	120116	75451.9	77143.1
Q9NQ75	CASS4	Cas scaffolding protein family member 4	31	741621	729674	771822	709832	803782	718953	692643	762504	708914	764944	700750	679684	686409	684196	717000	740157	743927	711996
P20810-6	CAST	Isoform 6 of Calpastatin	16	617458	722567	638324	484779	576068	580348	631311	370810	483497	555566	687621	653649	656521	658117	586598	509153	632083	756054
P04040	CAT	Catalase	22	1.14022e+06	1.21622e+06	1.17974e+06	1.05413e+06	1.17974e+06	1.25245e+06	1.2135e+06	1.1188e+06	982232	1.1398e+06	1.18812e+06	1.1512e+06	1.23726e+06	1.56023e+06	1.29101e+06	1.53162e+06	1.10232e+06	1.1636e+06
O95810	CAVIN2	Caveolae-associated protein 2	18	1.13235e+06	1.50892e+06	2.03019e+06	1.4501e+06	2.23729e+06	1.70248e+06	1.40424e+06	2.43558e+06	1.34925e+06	1.84744e+06	1.39536e+06	1.54621e+06	1.31422e+06	1.41253e+06	1.5461e+06	2.51488e+06	1.36223e+06	1.61347e+06
Q13951-2	CBFB	Isoform 2 of Core-binding factor subunit beta	1	83886.5	122359	35464.9	69202.3	29171.6	30782.6	84326.8	35727.1	47135.1	32775.2	76016	73562.7	68312.5	76258.1	61246.5	42744.3	88056.1	55337
P22681	CBL	E3 ubiquitin-protein ligase CBL	6	259231	246780	269837	247764	251384	260712	238808	218358	233406	253733	231769	256322	249919	226746	244112	225828	241613	259500
P16152	CBR1	Carbonyl reductase [NADPH] 1	13	790275	815811	674602	695098	801766	626627	790275	715073	720336	680377	762540	939961	675698	769171	716628	694106	878428	839677
Q13185	CBX3	Chromobox protein homolog 3	3	140334	137107	96849.3	140464	97906.8	119565	123845	114858	118158	100216	127067	159187	114606	128738	107533	114746	138382	130180
Q6P1N0	CC2D1A	Coiled-coil and C2 domain-containing protein 1A	2	212533	229735	505939	194716	298710	495469	242236	275588	192034	349534	276286	258673	181296	267157	195489	438722	231803	270156
Q5T0F9	CC2D1B	Coiled-coil and C2 domain-containing protein 1B	3	149870	139428	198330	190668	174269	177184	146163	198167	148791	176910	152921	114742	159331	115169	136684	247045	142206	147623
Q96CT7	CCDC124	Coiled-coil domain-containing protein 124	2	130726	45819.8	92670.6	74727.3	112560	80031.6	40488	107522	107662	125337	116061	63991.5	61908.2	27714.4	64934.4	105020	61969.2	88697.7
O60826	CCDC22	Coiled-coil domain-containing protein 22	7	142512	165719	184676	166330	181890	173094	194143	191366	167845	192311	153535	169175	150718	139455	153327	149751	151010	108300
Q86WR0	CCDC25	Coiled-coil domain-containing protein 25	4	136669	154414	150186	149356	141612	137260	125994	166136	146780	145865	148352	117242	183849	137317	115937	179028	147297	175043
Q96MW1	CCDC43	Coiled-coil domain-containing protein 43	4	64033.7	66567.3	53230.5	57562.7	54959.2	48105.4	61370.9	59468	55089.1	61713.6	63551.1	60614.7	61796.2	61145.5	51656.9	63345.6	60721.7	75479.8
Q4VC31	CCDC58	Coiled-coil domain-containing protein 58	3	244741	296190	299608	237726	334707	298123	280441	302867	257197	290848	261530	287629	266995	263739	260782	377318	255917	321519
Q16204	CCDC6	Coiled-coil domain-containing protein 6	10	414473	494635	226470	331419	250111	210913	349336	274639	296196	246799	423209	355411	366975	395835	269008	285032	414071	499376
Q3V6T2	CCDC88A	Girdin	3	181249	152904	73154.9	61511.2	93409.5	80675.4	140596	105550	69938.7	93874.6	145852	129295	243180	214169	62301.4	87199.2	214169	145852
Q9Y3X0	CCDC9	Coiled-coil domain-containing protein 9	3	103086	114378	90267.4	124055	107522	70403.8	101668	173039	100873	101402	105649	106178	101668	90055.1	89967.1	144382	89555.2	83563.5
Q7Z6B0	CCDC91	Coiled-coil domain-containing protein 91	7	253062	295691	287768	317919	336982	328086	299747	248447	323545	286348	271740	277752	280794	316552	308547	284121	304530	361762
Q567U6	CCDC93	Coiled-coil domain-containing protein 93	8	293567	365029	381165	343109	352374	365303	321738	318359	332100	372331	344481	341268	301171	348476	332773	284583	363233	377840
Q6ZUT6	CCDC9B	Coiled-coil domain-containing protein 9B	2	47547.6	75857.8	46020.3	86226.5	81233.4	56322.7	73412.9	66194.6	63293.2	64518.6	61872.3	59038.9	65641	57402.1	65815.5	57915	78728.5	80137
P13501	CCL5	C-C motif chemokine 5	3	378959	438338	614378	556366	762504	696685	489706	956721	689096	902806	459055	422856	567084	459055	433104	676932	569283	536744
Q9BSQ5-2	CCM2	Isoform 2 of Cerebral cavernous malformations 2 protein	2	1.32648e+06	1.34215e+06	819728	1.26766e+06	729243	855990	1.41627e+06	911897	1.10966e+06	745634	1.27376e+06	1.28157e+06	1.45909e+06	1.30723e+06	1.46836e+06	819728	1.32816e+06	1.18274e+06
P30281	CCND3	G1/S-specific cyclin-D3	2	83818.4	164264	234322	142922	275867	238431	160184	252768	216424	260133	142682	164361	140004	131655	187361	236053	182322	149187
O14618	CCS	Copper chaperone for superoxide dismutase	10	1.0868e+06	1.63471e+06	731053	1.3885e+06	796699	1.11535e+06	1.20315e+06	952331	1.49361e+06	701938	1.72206e+06	1.60534e+06	1.94756e+06	1.18175e+06	1.6154e+06	1.02189e+06	1.70556e+06	1.76775e+06
P78371	CCT2	T-complex protein 1 subunit beta	26	1.17277e+06	1.27811e+06	1.05767e+06	1.23786e+06	1.08237e+06	1.05767e+06	1.37963e+06	1.10092e+06	1.31892e+06	1.0183e+06	1.40402e+06	1.34711e+06	1.35168e+06	1.34361e+06	1.38002e+06	1.21408e+06	1.27811e+06	1.29857e+06
P49368	CCT3	T-complex protein 1 subunit gamma	35	1.78825e+06	1.90212e+06	2.26224e+06	1.84316e+06	2.22733e+06	2.18312e+06	1.96864e+06	2.15478e+06	2.11639e+06	2.11639e+06	1.715e+06	2.16603e+06	1.59106e+06	1.8146e+06	1.95556e+06	2.26224e+06	1.98171e+06	1.93775e+06
P50991	CCT4	T-complex protein 1 subunit delta	27	942842	1.03472e+06	1.34421e+06	988482	1.29101e+06	1.33057e+06	958509	1.71375e+06	1.1188e+06	1.34686e+06	1.04658e+06	1.01909e+06	1.04934e+06	1.2488e+06	1.1418e+06	1.57384e+06	1.04934e+06	1.02416e+06
P48643	CCT5	T-complex protein 1 subunit epsilon	28	1.97744e+06	2.57296e+06	2.28075e+06	2.16791e+06	2.16791e+06	2.16791e+06	2.58038e+06	2.28075e+06	2.03788e+06	2.24947e+06	2.62971e+06	2.58038e+06	2.44248e+06	2.54212e+06	2.23729e+06	2.21508e+06	2.5907e+06	2.64302e+06
P40227	CCT6A	T-complex protein 1 subunit zeta	21	534906	434424	643908	559542	636110	624216	471786	680377	571169	687694	469232	498957	484960	489667	530890	727908	524163	540917
Q99832	CCT7	T-complex protein 1 subunit eta	27	731639	689098	796699	711914	769915	771822	717203	822038	753063	809593	699363	763310	690371	720669	679745	866573	766769	757479
P50990	CCT8	T-complex protein 1 subunit theta	32	809168	854051	1.05195e+06	892548	1.03325e+06	1.0293e+06	835177	1.13847e+06	939371	1.04788e+06	826401	854051	770438	817624	943071	1.20245e+06	904360	970179
P86790	CCZ1B	Vacuolar fusion protein CCZ1 homolog B	5	116885	181719	87372	153059	86507.5	89483.7	158342	93717.1	102152	94051.1	140544	145023	121662	123228	130279	95335.5	130505	106076
Q6YHK3	CD109	CD109 antigen	15	327896	349901	249243	291445	207884	342590	340085	289124	279050	405760	275741	261136	376908	380596	281960	580691	393907	313150
P08571	CD14	Monocyte differentiation antigen CD14	2	242015	239506	79326.7	219770	98615.8	82147.8	245447	76254.3	163573	88798.5	282201	219587	283889	276012	159343	82921.7	264394	273631
P48509	CD151	CD151 antigen	6	200863	143791	374976	174164	288894	267264	146183	322588	208096	306797	160725	155881	184637	174221	204527	289914	168875	228472
Q15762	CD226	CD226 antigen	6	818731	625303	1.30948e+06	873112	1.77749e+06	1.36622e+06	623038	1.47183e+06	904334	1.20245e+06	613755	689317	730947	737036	946969	2.76314e+06	560431	596048
Q9Y5K6	CD2AP	CD2-associated protein	15	386551	484126	541412	462528	549164	542319	452324	541824	474950	539887	516459	507325	465095	529498	486150	466801	539288	530427
P16671	CD36	Platelet glycoprotein 4	11	1.08169e+06	735802	2.09604e+06	1.12312e+06	2.03019e+06	3.22028e+06	952371	2.08143e+06	1.50543e+06	2.28075e+06	837272	720338	1.0361e+06	841958	710644	1.98107e+06	774743	682847
P11049	CD37	Leukocyte antigen CD37	1	64515.6	46794.7	80510.6	62881.8	64164.7	82284.8	49413.7	75339.6	61793.4	77200.1	45081.2	56377.4	58302.8	63486.6	57775.4	68599.5	63169.2	78995.4
P28907	CD38	ADP-ribosyl cyclase/cyclic ADP-ribose hydrolase 1	2	278006	229138	199581	148403	71653.2	145106	159595	98267.8	124715	80154.2	206587	181394	261885	190534	123407	168152	119853	182573
P29965	CD40LG	CD40 ligand	3	328857	241664	520425	297345	481787	566161	303279	493354	293486	526063	234963	279018	287920	260287	282670	421084	272546	253630
P16070	CD44	CD44 antigen	3	282967	289287	168449	244656	146780	178334	260460	199678	206770	148729	252164	245116	233329	230451	199755	196649	262160	260026
P15529-2	CD46	Isoform B of Membrane cofactor protein	6	447314	285986	382318	365135	361071	382814	317192	419732	366830	373071	320960	255142	417865	311406	304558	369838	276370	311406
Q08722	CD47	Leukocyte surface antigen CD47	3	610542	483149	1.13079e+06	686145	836675	873112	574831	1.21702e+06	686145	1.00661e+06	480313	526046	541257	548603	621608	911897	492176	545760
P08174-7	CD55	Isoform 7 of Complement decay-accelerating factor	4	462521	354086	764944	463209	641033	816828	411345	789563	690486	919682	353733	353549	437335	478622	398268	432515	396646	436031
P19256	CD58	Lymphocyte function-associated antigen 3	1	48271.4	60860.7	81508.9	49892.2	60035.1	72407.8	60943.6	79873.5	49557.7	64714.4	45114.1	48987.7	45980.8	45678.4	38248.2	76197.1	52397.5	44814.8
P13987-2	CD59	Isoform 2 of CD59 glycoprotein	2	245441	148803	397078	187692	275858	338984	160837	382814	226960	355757	184716	182308	205221	232271	219651	263231	158449	192678
O43866	CD5L	CD5 antigen-like	11	294113	313560	95226	475406	92744.1	90773.2	314595	215936	300018	90267.4	438049	379171	442389	454383	289963	124136	345168	332761
P08962	CD63	CD63 antigen	4	176021	159785	251709	193098	228016	270551	166772	207099	214170	223072	168102	144843	190136	139342	168552	268577	159083	224051
P27701	CD82	CD82 antigen	2	55855.7	96240.4	210457	81462.9	145592	169012	95018	162336	115045	122443	79561	103009	62580.5	69226.1	115379	137574	88554.6	48585.2
P21926	CD9	CD9 antigen	5	1.07819e+06	899219	1.55068e+06	958532	1.51481e+06	1.4758e+06	770121	1.69718e+06	1.05561e+06	1.38421e+06	702206	978695	909182	802635	976622	1.33626e+06	825101	1.00628e+06
Q16543	CDC37	Hsp90 co-chaperone Cdc37	10	409543	502887	329559	473136	366394	340907	441071	239868	401574	332773	494989	466321	433910	454762	363043	345183	468746	526765
Q7L3B6	CDC37L1	Hsp90 co-chaperone Cdc37-like 1	1	125234	167695	89172.5	112499	97417.4	80154.2	153306	81462.9	105487	88280.8	169611	143434	154620	161377	122754	92744.1	171009	156944
P60953	CDC42	Cell division control protein 42 homolog	8	434020	482921	536739	522159	516490	507519	404265	548482	489899	530890	444926	383572	464715	413839	443178	538287	461684	477915
Q9Y5S2	CDC42BPB	Serine/threonine-protein kinase MRCK beta	26	853792	959584	596967	716079	789563	660808	965222	740157	731053	795200	901739	941173	933689	955371	623071	655520	936411	759844
P12830	CDH1	Cadherin-1	1	152367	163442	153690	177007	175557	179522	204485	231243	176235	204883	177466	163035	167061	166025	170886	205613	168543	155031
P33151	CDH5	Cadherin-5	2	158065	278607	70629.6	154898	60382.1	84411.6	176243	94465.1	133865	88203.3	148883	147303	187972	143086	122537	82234.9	178460	151538
Q9H305	CDIP1	Cell death-inducing p53-target protein 1	2	114518	71092	164848	99433.8	146600	155466	79689.9	128979	95713.5	142926	86151.8	97682.8	98899.7	72277.2	95511.5	123249	101177	101177
P24941	CDK2	Cyclin-dependent kinase 2	7	138071	168725	154898	167003	148935	143282	154110	140829	147441	142198	167451	150989	173882	158330	212913	160720	156337	148793
Q96JB5-4	CDK5RAP3	Isoform 4 of CDK5 regulatory subunit-associated protein 3	9	305036	416510	616049	477165	830209	623691	382956	827825	528323	976622	308358	472335	345582	386609	491177	651226	411928	368660
O95674	CDS2	Phosphatidate cytidylyltransferase 2	8	100535	72038.3	122303	91355.6	110948	110473	89119.8	117105	91722.4	115652	69111.7	87205.9	99450.4	88993.4	89423.9	102789	88110.9	72038.3
Q9UKY7	CDV3	Protein CDV3 homolog	6	326932	390342	717000	504075	580348	594754	333430	348649	545413	563216	349151	494819	326932	351379	494325	512797	353133	484997
O95319-3	CELF2	Isoform 3 of CUGBP Elav-like family member 2	6	369231	338472	279840	286697	266305	272560	298909	274089	301399	270804	325292	290095	312573	262147	328569	271412	336242	348904
Q92674	CENPI	Centromere protein I	2	671303	714701	658849	706667	617216	670827	669739	691049	684819	664701	634710	600787	716496	838887	602256	807139	738872	846629
Q9UPN4	CEP131	Centrosomal protein of 131 kDa	6	82389.2	85122.7	101888	85929.2	94530.4	78177.2	86803.9	74420.4	90444.6	88858.1	79597.7	69766.9	86456.6	93200.1	96167.6	85669.9	91568.9	72521
Q5SW79	CEP170	Centrosomal protein of 170 kDa	8	140021	161595	153205	168152	159948	156813	145357	136366	168152	161692	160613	152056	151311	157704	142609	144707	164235	154493
Q9BYV8	CEP41	Centrosomal protein of 41 kDa	4	93693.3	108561	110366	103176	120259	112679	116774	89483.7	105947	125061	120824	125736	114756	111308	95443.4	110948	116862	142976
Q9C0F1-2	CEP44	Isoform 2 of Centrosomal protein of 44 kDa	1	121011	79058.5	111950	137260	86226.5	81233.4	93959.1	109372	119068	99215.1	88417.2	96702.7	95186.9	92038.1	96623.6	116390	116201	99516.1
Q9Y6K0	CEPT1	Choline/ethanolaminephosphotransferase 1	1	143120	53805.3	192782	125337	192034	197192	127219	159343	128309	183129	75794.6	108345	114049	117863	118894	128033	114049	106621
Q96G23	CERS2	Ceramide synthase 2	5	611558	463743	501366	445570	418720	528764	517825	334905	484779	460151	398637	405922	556107	406845	647763	283794	416658	308978
P23141-2	CES1	Isoform 2 of Liver carboxylesterase 1	3	24260.1	37426	40825.6	30628.5	52369	30151.6	52798.9	33797.4	33057.3	45357.9	32174.4	37114.9	26458.6	23368	32963.6	107410	57833.8	29562
P11597	CETP	Cholesteryl ester transfer protein	3	107498	72666	42013.2	69163.3	42511.4	39033.7	81699	49984.3	63834.5	50130.6	82289.2	67558.6	117347	72406.2	70267.2	41664.1	89739.4	74046.1
P00751	CFB	Complement factor B	27	3.19841e+06	1.98442e+06	521624	2.98427e+06	534042	625617	3.49126e+06	523189	2.16791e+06	475968	3.1667e+06	2.24357e+06	3.89797e+06	3.28783e+06	2.61319e+06	650332	3.19245e+06	2.91796e+06
P00746	CFD	Complement factor D	1	126613	144802	96693.7	121769	131493	90701.5	135257	108482	118260	105947	163460	143137	166814	139301	150336	88686.8	151907	142485
P08603	CFH	Complement factor H	47	3.52597e+06	3.21104e+06	842858	3.88795e+06	956721	971093	4.09963e+06	1.00284e+06	2.4812e+06	966901	3.83687e+06	2.87966e+06	4.47019e+06	3.44969e+06	3.32959e+06	1.05962e+06	3.60635e+06	3.65938e+06
Q03591	CFHR1	Complement factor H-related protein 1	7	117208	144080	25927.2	134724	31154.8	24661.1	93395.9	22145.4	113651	34755.4	250993	95647	187382	450153	103826	34350.1	446359	158662
P36980	CFHR2	Complement factor H-related protein 2	4	183586	192909	61311.9	155777	88899.2	63293.2	194557	153059	148048	63345.6	278845	195663	238644	183586	143712	108796	321343	368617
P05156	CFI	Complement factor I	12	825585	785492	282670	866573	311656	346572	927246	297345	684012	284583	959056	792815	1.08478e+06	915575	661285	307692	854385	744016
P23528	CFL1	Cofilin-1	19	2.65581e+06	2.87575e+06	4.6593e+06	3.00751e+06	4.6593e+06	4.28968e+06	2.80445e+06	4.02268e+06	3.32959e+06	4.11849e+06	2.80445e+06	3.25965e+06	2.5651e+06	2.93849e+06	3.0423e+06	4.02268e+06	2.91961e+06	3.07286e+06
Q9BWS9-2	CHID1	Isoform 2 of Chitinase domain-containing protein 1	6	500574	559136	522547	592557	560477	543425	569865	576959	601946	599787	551864	538070	525967	526741	498641	613735	527045	616347
Q9Y259	CHKB	Choline/ethanolamine kinase	5	209053	249301	278497	190244	248648	231474	220322	306909	178946	276732	205610	259383	195105	216003	193359	381648	225737	229261
Q9HD42	CHMP1A	Charged multivesicular body protein 1a	1	434069	365652	476994	379449	545264	533912	345713	550654	514101	539543	369899	385825	364169	655115	341518	559265	365045	392533
Q7LBR1	CHMP1B	Charged multivesicular body protein 1b	4	1.28502e+06	1.34936e+06	1.37573e+06	1.39811e+06	1.49361e+06	1.60387e+06	1.47937e+06	1.84316e+06	1.48238e+06	1.5111e+06	1.31036e+06	1.42631e+06	1.38177e+06	1.47044e+06	1.50727e+06	1.56376e+06	1.35749e+06	1.1904e+06
O43633	CHMP2A	Charged multivesicular body protein 2a	6	245859	285772	320047	257757	317919	301558	280159	273788	292624	288502	260498	251423	275678	260498	240030	313403	259464	272199
Q9Y3E7	CHMP3	Charged multivesicular body protein 3	2	446665	420619	740665	600165	695098	721486	482914	834056	609142	839669	491481	444305	502498	519038	590130	890374	503370	557758
Q9BY43-2	CHMP4A	Isoform 2 of Charged multivesicular body protein 4a	4	303481	338071	256037	258465	268835	251037	332919	311656	313761	296196	366475	307629	341850	341553	278781	335907	326028	315930
Q9H444	CHMP4B	Charged multivesicular body protein 4b	9	503299	458748	412532	505322	430577	429749	474704	524656	537758	461362	541944	524085	464111	421964	578825	521624	519083	448334
Q9NZZ3	CHMP5	Charged multivesicular body protein 5	4	43956.8	52379.6	57775.4	43397.7	59744.9	64633	46033.1	57074.2	57357.3	57634.5	61064.4	49506.9	54065.3	52268.8	52507	63764.3	54834.4	56829.6
Q96FZ7	CHMP6	Charged multivesicular body protein 6	5	157804	143761	199678	155426	147544	167845	114937	174115	137507	186245	131397	107411	131079	112288	146427	169228	133631	112809
Q9UHD1	CHORDC1	Cysteine and histidine-rich domain-containing protein 1	8	269838	276026	321568	311990	305821	297207	258462	300668	306909	320969	281821	270735	276764	261367	280835	322963	280798	289167
O15111	CHUK	Inhibitor of nuclear factor kappa-B kinase subunit alpha	9	119083	137450	178698	127344	180261	167505	136914	163053	148729	167505	121668	135989	132272	133375	144841	143078	135843	119001
O76071	CIAO1	Probable cytosolic iron-sulfur protein assembly protein CIAO1	2	99446.6	147531	63615.5	90267.4	58303.1	53919.8	140254	44882.8	83228.5	54104.6	136223	150195	123563	141081	115836	66846	143191	148165
Q9H5X1	CIAO2A	Cytosolic iron-sulfur assembly component 2A	1	196408	228242	311990	222710	256191	252039	152700	198330	245959	265931	225344	198517	252074	187869	191586	256796	232186	211238
Q9Y3D0	CIAO2B	Cytosolic iron-sulfur assembly component 2B	1	135081	123276	156802	113327	165249	143807	124718	145281	193658	167630	92803.8	105709	100249	108792	118111	172046	91655	119001
Q6FI81	CIAPIN1	Anamorsin	5	267879	344488	470113	421084	502801	552400	342601	383561	414782	498311	350435	304142	317078	316355	372074	404094	342601	361444
Q14011-2	CIRBP	Isoform 2 of Cold-inducible RNA-binding protein	3	139584	165213	169715	162443	189987	173839	160042	208882	155046	197090	178767	180553	127072	180367	177283	245460	155290	183610
Q8N5K1	CISD2	CDGSH iron-sulfur domain-containing protein 2	6	470426	340031	400920	436793	328332	372873	408689	351605	343109	357586	330635	250624	472257	379685	342333	333633	334653	280473
Q7Z460	CLASP1	CLIP-associating protein 1	9	169572	196545	182150	183129	178827	186901	220057	188810	165764	180759	208714	194746	217836	198832	372599	204966	210733	173278
O75122-3	CLASP2	Isoform 3 of CLIP-associating protein 2	7	171023	211141	223003	209862	217207	231134	163348	193359	225612	216156	201525	168781	175705	183706	253733	215237	149302	175705
O15551	CLDN3	Claudin-3	3	490869	196865	143160	299405	282242	255169	251129	277150	324782	243780	358502	296927	244817	265985	242296	306117	197604	243785
O00501	CLDN5	Claudin-5	4	140670	115175	207708	115937	210457	185844	90656.8	257915	177377	209497	124244	98703.7	109800	84208.4	113389	212913	110040	98703.7
Q9Y240	CLEC11A	C-type lectin domain family 11 member A	4	375778	517849	479210	412532	419472	417401	411341	460473	405760	339784	458327	298028	469499	360538	448798	569778	389004	512391
Q2KHT3	CLEC16A	Protein CLEC16A	4	482979	360939	204169	290701	186580	193098	325793	189268	311656	178827	344518	358233	388255	186239	316462	173571	427209	412134
Q9P126	CLEC1B	C-type lectin domain family 1 member B	8	3.66572e+06	2.10492e+06	684012	2.26224e+06	689096	906964	3.93427e+06	1.04788e+06	2.1508e+06	866573	2.15845e+06	2.81312e+06	2.47629e+06	2.04141e+06	2.36639e+06	588745	1.89095e+06	2.35007e+06
P0C7M8	CLEC2L	C-type lectin domain family 2 member L	2	389930	190367	314222	289442	329012	285617	208523	374525	270374	299156	194579	202141	215804	234895	272170	266204	211996	248219
P05452	CLEC3B	Tetranectin	6	481719	381186	85403.4	318985	87895.1	98477.7	453564	113558	364691	98939.5	425097	361620	543234	418506	308405	113736	417210	384941
O00299	CLIC1	Chloride intracellular channel protein 1	14	1.02672e+06	1.29983e+06	1.60387e+06	1.31892e+06	1.60975e+06	1.57384e+06	1.25604e+06	1.57832e+06	1.48673e+06	1.58797e+06	1.24269e+06	1.38152e+06	1.03654e+06	1.07916e+06	1.24924e+06	1.42605e+06	1.33198e+06	1.41887e+06
Q9Y696	CLIC4	Chloride intracellular channel protein 4	15	1.14482e+06	1.3308e+06	2.22733e+06	1.87349e+06	2.74254e+06	1.50543e+06	1.21833e+06	1.50727e+06	1.60975e+06	2.36639e+06	1.17435e+06	1.31587e+06	1.13136e+06	1.22748e+06	1.1864e+06	1.27879e+06	1.2392e+06	1.4964e+06
Q96NY7	CLIC6	Chloride intracellular channel protein 6	1	98891.2	144420	27754.9	121078	27013.3	29889.7	123523	20640.3	59125.1	18443.9	138120	148646	113054	106623	55382	26559.2	131466	169704
Q9UDT6-2	CLIP2	Isoform 2 of CAP-Gly domain-containing linker protein 2	29	433843	520551	483959	439090	477505	477505	484975	498641	470113	503638	481479	459051	489888	493985	458187	521257	496367	528578
P54105	CLNS1A	Methylosome subunit pICln	1	97032	109105	117774	139434	149437	126511	124332	125875	115436	141361	115226	104469	111472	85951.1	112129	153127	103958	88242.2
Q9H078	CLPB	Caseinolytic peptidase B protein homolog	3	210694	171050	135565	179290	139740	154657	155078	153599	157766	168834	203982	143334	223025	154341	149002	143832	213434	190792
O94985	CLSTN1	Calsyntenin-1	6	107072	132417	119522	164510	156704	146876	146739	151712	162776	150186	151985	120616	142304	145576	131411	166466	138101	156860
P09496-2	CLTA	Isoform Non-brain of Clathrin light chain A	7	479405	489898	547292	601296	629070	610660	508321	610660	647763	626627	442707	509643	469704	477114	537758	458709	513011	533620
P09497-2	CLTB	Isoform Non-brain of Clathrin light chain B	7	393556	419082	834056	581131	995460	815319	442617	797549	654176	892548	413598	472176	440991	434535	597548	728344	450168	496580
Q00610	CLTC	Clathrin heavy chain 1	74	2.0401e+06	1.86434e+06	3.19343e+06	2.1508e+06	2.98427e+06	3.36084e+06	2.26129e+06	3.19343e+06	2.43558e+06	2.94705e+06	1.56533e+06	2.41519e+06	1.656e+06	2.0401e+06	2.35711e+06	2.79994e+06	2.05128e+06	1.59361e+06
P10909-2	CLU	Isoform 2 of Clusterin	15	1.28097e+06	1.02495e+06	700802	1.06829e+06	746741	847284	997139	768661	1.04535e+06	815319	1.05991e+06	881489	1.23018e+06	1.04946e+06	848174	720336	1.04338e+06	865355
Q8IY22	CMIP	C-Maf-inducing protein	14	349406	402904	546389	444022	609142	593203	468290	591676	515818	560477	433506	454020	431284	384689	493354	483497	453510	414041
P30085-3	CMPK1	Isoform 3 of UMP-CMP kinase	6	532812	490796	746741	569190	790292	728344	509906	727025	626627	735337	484362	497722	470176	552383	534696	817420	492140	514943
Q96MX0	CMTM3	CKLF-like MARVEL transmembrane domain-containing protein 3	1	308989	146613	242296	192879	246196	257197	155873	229712	227659	264162	173934	183692	193384	119816	218514	248268	151651	224689
Q9NX76	CMTM6	CKLF-like MARVEL transmembrane domain-containing protein 6	3	162307	185928	410937	140760	225612	419472	208035	416394	139091	326166	199320	198571	215675	191433	151601	433463	187430	161269
Q96KN2	CNDP1	Beta-Ala-His dipeptidase	2	238796	215356	60853.2	170008	64312.6	60180.1	253919	87945.4	131001	62484.6	212004	169704	256465	260345	156234	78210.7	256749	170303
Q96KP4	CNDP2	Cytosolic non-specific dipeptidase	16	633777	846499	817420	725504	749674	774761	747207	796699	699981	739480	732891	700050	638758	716022	724646	980866	742128	922349
Q99439	CNN2	Calponin-2	14	939567	1.12715e+06	1.60975e+06	1.13269e+06	1.43833e+06	1.55068e+06	1.23215e+06	1.1864e+06	1.21408e+06	1.54052e+06	1.2357e+06	1.01748e+06	968931	1.0236e+06	1.27879e+06	1.35338e+06	997013	1.12308e+06
A5YKK6	CNOT1	CCR4-NOT transcription complex subunit 1	11	157369	178166	183414	165861	199020	188215	182078	189701	168216	177007	173391	207579	148830	169300	168216	177563	188176	153529
Q9NZN8	CNOT2	CCR4-NOT transcription complex subunit 2	2	110599	99070.8	42384.4	99610.5	44495.8	43104.3	140214	44954	83691	47750.6	105807	126128	122720	99641.4	106747	29770	112358	126946
O75175	CNOT3	CCR4-NOT transcription complex subunit 3	3	162454	174989	160355	181488	177377	160206	172279	179865	161692	185338	169568	156948	167521	168961	188901	183835	158256	157804
Q92600-2	CNOT9	Isoform 2 of CCR4-NOT transcription complex subunit 9	3	103883	123325	129411	113651	134970	121389	123014	112620	110019	124312	126794	142004	121677	116726	121107	114614	139565	144353
P09543	CNP	2',3'-cyclic-nucleotide 3'-phosphodiesterase	13	455909	425156	527732	408510	528323	541412	430355	511282	460473	518304	441783	429201	424653	456309	479618	530033	429201	464489
Q9Y2B0	CNPY2	Protein canopy homolog 2	3	68597.4	88865.1	59698.5	85203.3	86127.1	66869.6	81630.8	95526.7	90940.8	83290.9	72903.5	70472	67401.9	69634.1	76232.5	88298.2	84492.7	100498
Q9BT09	CNPY3	Protein canopy homolog 3	6	316723	605986	381889	327582	358726	303019	510806	374224	274519	261021	400149	604349	405922	466625	326797	460151	555319	480374
Q6PJW8	CNST	Consortin	15	781254	652301	390364	643908	433992	387454	741548	354655	645021	486150	629299	720926	744113	764488	656185	380615	694795	732277
Q13057-2	COASY	Isoform 2 of Bifunctional coenzyme A synthase	10	129053	156939	123822	138966	133176	133865	138259	125098	136904	117831	137491	142020	193793	141896	177563	135115	154474	154790
Q8WTW3	COG1	Conserved oligomeric Golgi complex subunit 1	4	136820	140671	125061	99970.7	117975	113323	119894	106596	109211	121868	128852	120530	113372	119400	128033	96926.5	130839	105736
Q96JB2	COG3	Conserved oligomeric Golgi complex subunit 3	4	199362	264397	138333	164644	145176	150586	204544	168693	182681	129734	222621	258218	175795	220358	157401	149198	248309	188335
Q9H9E3	COG4	Conserved oligomeric Golgi complex subunit 4	8	326480	407903	132045	404094	139434	123886	455553	127077	320969	122073	420258	417627	407452	388825	243430	113818	471022	385231
Q9UP83-2	COG5	Isoform 2 of Conserved oligomeric Golgi complex subunit 5	5	27667.4	114536	202431	174900	205760	183414	138576	188215	174994	212414	54343.7	113767	66399.2	66399.2	172965	152228	142228	55889.7
Q9Y2V7	COG6	Conserved oligomeric Golgi complex subunit 6	5	130402	129914	209830	167942	224252	205255	146040	153092	168219	183422	119487	108619	139455	99834.3	164365	134283	119001	104937
P83436	COG7	Conserved oligomeric Golgi complex subunit 7	5	139728	196943	54280.8	130927	54801.6	49176.9	196642	54897.6	100159	51656.9	167254	192641	133687	161741	102995	55932.7	204911	151184
Q96MW5	COG8	Conserved oligomeric Golgi complex subunit 8	4	95871.9	97595.9	107305	99859.9	115045	106386	93135.9	109569	106146	120259	89934.3	86801.4	95564.8	77654.1	100657	102066	90761.7	86309
P08572	COL4A2	Collagen alpha-2(IV) chain	1	54227.8	50498.5	40478.7	39682.6	38181.3	36101.2	66863.7	47135.1	47391.3	37363.3	56799.5	42703.6	70704.3	67916.2	41714.9	59100.8	50132.7	62290.2
Q9Y5P4-3	COL4A3BP	Isoform 3 of Collagen type IV alpha-3-binding protein	9	397075	429163	329906	419732	379489	376115	433304	410937	381165	378076	476165	413975	441738	469711	404277	380101	383789	394634
P12111	COL6A3	Collagen alpha-3(VI) chain	2	74152.4	67461.4	54431.5	53763.5	53064.7	65637.3	75697.9	103907	60683.2	73215.6	63712.4	56510.3	55666.3	83366.2	58720.2	67528.3	81585.1	73947.8
Q8NBJ5	COLGALT1	Procollagen galactosyltransferase 1	1	48618.5	53716.6	37236	25284	47379.6	49767.8	43806	29064.7	35436	25284	54170	53924.2	38686.2	42451.6	33270.9	59047.1	58098.4	65461.3
Q9Y6G5	COMMD10	COMM domain-containing protein 10	4	382295	449262	569778	598580	574433	559542	369907	657376	539216	588745	320647	421473	440942	410364	515818	585086	307056	442961
Q86X83	COMMD2	COMM domain-containing protein 2	2	100405	125558	131493	111450	126176	126930	113189	143373	124055	134649	109260	128334	100533	127389	114310	126254	110946	127389
Q9H0A8	COMMD4	COMM domain-containing protein 4	1	529636	538481	287226	439927	310363	325307	489681	263231	504525	265294	513751	496947	527491	800090	950919	242777	526928	511113
Q86VX2	COMMD7	COMM domain-containing protein 7	1	74258.8	95010.4	88858.1	101888	88858.1	92298.2	88459.9	90969.2	80381.2	103115	87138.7	94792.5	78440.6	86231.9	73044	74727.3	96815.2	93998.1
Q9NX08	COMMD8	COMM domain-containing protein 8	2	188757	268889	322963	236484	307824	343278	235474	281655	232308	325511	224876	180376	223337	158434	214932	316288	218511	203970
P49747	COMP	Cartilage oligomeric matrix protein	3	94287.4	56978.5	15681.4	84031.2	14718.4	15564	81474.7	24101.3	63764.3	18124.8	124829	129050	115698	102438	69117.6	24510.3	102438	185726
P21964	COMT	Catechol O-methyltransferase	11	1.03082e+06	776338	1.5003e+06	1.08099e+06	567085	584221	1.00634e+06	1.40168e+06	1.17137e+06	2.03788e+06	891680	866131	915176	866131	993109	1.11535e+06	762346	819307
P53621-2	COPA	Isoform 2 of Coatomer subunit alpha	44	1.32629e+06	1.40955e+06	2.37426e+06	1.545e+06	2.11639e+06	2.64925e+06	1.55699e+06	2.09604e+06	1.64582e+06	2.4095e+06	1.33992e+06	1.60794e+06	1.34421e+06	1.38848e+06	1.545e+06	1.45909e+06	1.46237e+06	1.2421e+06
P53618	COPB1	Coatomer subunit beta	30	762337	854024	1.08658e+06	890374	1.12453e+06	1.06714e+06	890990	999088	948670	1.03571e+06	840167	857942	811950	802283	848992	957848	857942	831220
P35606	COPB2	Coatomer subunit beta'	24	500739	563495	570320	589475	625617	564622	555312	587243	537139	581586	523522	602969	475903	516878	528323	486900	554495	547126
O14579	COPE	Coatomer subunit epsilon	8	461542	502537	748561	629070	737170	733614	498362	932080	596967	763631	523260	600318	509653	459322	676932	831017	497391	419078
Q9Y678	COPG1	Coatomer subunit gamma-1	29	486059	592230	610660	530418	658257	606469	516357	698353	591676	642547	483200	538304	549847	535826	607496	557539	588604	479781
Q9UBF2	COPG2	Coatomer subunit gamma-2	12	322713	285017	267201	331168	279711	338425	296834	278016	318985	306117	312654	294013	301434	329080	287654	228785	307231	315723
P61201-2	COPS2	Isoform 2 of COP9 signalosome complex subunit 2	15	644583	760434	578825	739480	610966	555566	731625	672458	672458	590577	683704	677194	680671	694029	689096	563216	750387	688887
Q9UNS2	COPS3	COP9 signalosome complex subunit 3	7	223284	240397	298331	285617	327307	314944	221528	317443	310363	309015	252314	221847	227923	209035	278258	267731	269151	228289
Q9BT78	COPS4	COP9 signalosome complex subunit 4	21	704112	750019	901884	653252	829072	871979	738261	855238	743091	801766	727775	763191	641305	702572	684819	636110	745593	775064
Q92905	COPS5	COP9 signalosome complex subunit 5	10	361223	482978	506294	607496	612201	411443	443498	422824	468526	429749	448171	453618	419701	406465	383212	438344	487513	507563
Q7L5N1	COPS6	COP9 signalosome complex subunit 6	5	559007	694947	837521	580691	669917	646599	633013	568541	633330	601296	624787	633013	576890	673877	616715	586598	664086	662484
Q9UBW8	COPS7A	COP9 signalosome complex subunit 7a	6	110502	116639	132943	121107	149622	136028	107461	167775	110313	144986	124001	116238	137737	123269	125337	121909	124001	99878.7
Q9H9Q2	COPS7B	COP9 signalosome complex subunit 7b	3	69131.6	102004	149622	106747	142071	122839	105201	122839	122596	125098	107392	97302	104533	113692	97417.4	159421	115896	108787
Q99627	COPS8	COP9 signalosome complex subunit 8	3	124237	153348	146500	138762	149108	110762	151573	133733	117709	126112	122334	143164	148754	150451	140521	163053	148696	113556
P61923-4	COPZ1	Isoform 4 of Coatomer subunit zeta-1	3	120335	168878	91355.6	116676	91819.2	86970	131927	100349	112560	92574.9	128698	148958	113172	128698	112378	103346	162477	169901
P31146	CORO1A	Coronin-1A	21	2.32996e+06	2.96085e+06	5.04201e+06	2.31887e+06	4.42591e+06	2.84839e+06	3.00736e+06	3.72083e+06	2.22733e+06	5.31154e+06	2.11896e+06	2.59809e+06	2.06153e+06	2.69853e+06	2.16791e+06	3.51818e+06	2.83231e+06	2.61214e+06
Q9BR76	CORO1B	Coronin-1B	14	676133	756920	1.03827e+06	865589	1.1834e+06	1.00661e+06	788546	980866	807856	1.06975e+06	653864	762876	722372	720634	741342	1.10469e+06	814592	753821
Q9ULV4-3	CORO1C	Isoform 3 of Coronin-1C	24	1.40666e+06	1.93865e+06	2.05672e+06	1.8126e+06	2.30297e+06	1.9469e+06	1.803e+06	2.4095e+06	1.66948e+06	2.33711e+06	1.43907e+06	1.77361e+06	1.32057e+06	1.61795e+06	1.45607e+06	2.36639e+06	1.88801e+06	2.25118e+06
P57737-3	CORO7	Isoform 3 of Coronin-7	7	266504	281989	134061	231765	130279	142071	296129	131411	216094	136594	278028	287429	264688	260212	213976	150022	444900	259758
Q14019	COTL1	Coactosin-like protein	10	592392	799489	971093	656185	693410	797549	630348	971093	740157	714524	696085	588811	546603	599816	638324	1.10317e+06	715768	752892
Q14061	COX17	Cytochrome c oxidase copper chaperone	1	169695	252064	125240	218249	139913	136472	215358	133119	222006	128901	200347	281014	186673	197393	113243	148403	190297	220873
P20674	COX5A	Cytochrome c oxidase subunit 5A, mitochondrial	2	370086	147989	640050	215721	914891	427855	274868	460790	198445	767415	233569	369118	294058	233803	387032	546010	149984	249477
P14854	COX6B1	Cytochrome c oxidase subunit 6B1	1	45318.9	37907.1	65510.2	41655.9	50215	64569.8	32418.3	22568.5	50792.2	42257.4	43356.5	48647.4	32521.8	33322.9	38760.7	35464.9	37241.3	54597.2
P14406	COX7A2	Cytochrome c oxidase subunit 7A2, mitochondrial	2	182035	68449.3	228785	126758	120720	151830	115596	303799	122915	131554	86146	153560	131310	92100.9	154850	186976	94586.5	99040.8
P00450	CP	Ceruloplasmin	31	3.09156e+06	4.62552e+06	787217	3.68869e+06	913766	805539	4.48978e+06	807139	3.24457e+06	777447	4.08292e+06	4.52243e+06	5.04292e+06	4.82397e+06	3.22028e+06	937448	3.95025e+06	3.98852e+06
Q96IY4	CPB2	Carboxypeptidase B2	3	381697	431132	232820	294588	201466	185571	384207	244112	319573	218249	414614	388938	433175	413176	322963	266925	399339	467848
P15169	CPN1	Carboxypeptidase N catalytic chain	3	278534	267360	166136	286471	142609	150336	312922	119690	252882	147384	342711	238215	400738	276971	275290	158178	307540	256917
P22792	CPN2	Carboxypeptidase N subunit 2	8	289490	315638	151179	325511	160262	174994	408312	166774	322066	160481	471187	309959	488925	368901	649738	224734	405851	272354
Q99829	CPNE1	Copine-1	11	813837	764714	725504	757385	669030	778826	837498	504525	681286	774761	772483	722042	784392	855380	671803	760594	807743	895721
Q96FN4	CPNE2	Copine-2	7	197491	211776	282476	230822	310892	241327	207906	298710	206684	251515	218456	226781	215579	197723	220709	296923	199755	247386
O75131	CPNE3	Copine-3	16	491634	566041	757593	570607	763719	761625	486270	851351	596781	692062	526099	490629	552102	489998	545432	970197	538284	560236
P36551	CPOX	Oxygen-dependent coproporphyrinogen-III oxidase, mitochondrial	6	167063	160046	238531	169012	219009	192034	173845	175063	182511	186976	154029	157379	185419	177162	177377	257197	157379	158623
Q9BRF8	CPPED1	Serine/threonine-protein phosphatase CPPED1	5	202568	186671	243357	193938	292880	282242	164397	252629	261891	268835	201561	298487	199996	311129	230552	218249	210259	148425
P50416	CPT1A	Carnitine O-palmitoyltransferase 1, liver isoform	22	1.28947e+06	631092	1.11245e+06	809593	1.26313e+06	1.16572e+06	694869	1.09636e+06	950919	1.0935e+06	670322	742459	738394	739435	870941	910937	699155	702981
P23786	CPT2	Carnitine O-palmitoyltransferase 2, mitochondrial	14	869970	451419	244864	446880	295411	287512	527210	309809	400920	258776	495727	564873	625647	642532	303687	383948	434422	573351
Q9H3G5	CPVL	Probable serine carboxypeptidase CPVL	1	241936	315963	133176	247917	124488	309190	247556	265832	191586	192439	243687	267428	287913	268026	260712	195922	290624	262521
Q96SM3	CPXM1	Probable carboxypeptidase X1	1	15721.6	25173.8	21899.9	40064.1	32963.6	33341.2	27514.3	41242	35958.6	36026.6	25374.4	21958.5	19897	16644.5	32375	44642	21486.4	21958.5
P78560	CRADD	Death domain-containing protein CRADD	1	80293.1	77151.5	96011.6	96098.7	98024.4	82605.5	107629	61078	79873.5	81762.1	185141	94030.7	116190	97908.7	109429	84411.6	82498.4	87018.1
P43155	CRAT	Carnitine O-acetyltransferase	8	273228	230041	272027	225502	263231	261174	244441	246799	229982	261635	232346	240220	249614	255051	282242	280055	208056	258904
Q96SW2	CRBN	Protein cereblon	8	162517	227108	209862	187316	218514	200067	195622	193815	189701	209191	198854	220530	167338	188574	178946	206770	211260	239900
Q8TEY5	CREB3L4	Cyclic AMP-responsive element-binding protein 3-like protein 4	1	46328.8	41219.7	138633	33057.3	53230.5	115652	50101.1	42873.3	31747.9	92842.1	47557.6	30193.3	45173.5	60283.8	41835.8	90444.6	31595.7	25065.7
Q6UXH1-5	CRELD2	Isoform 5 of Cysteine-rich with EGF-like domain protein 2	5	241769	236914	123249	360500	226807	204331	327566	187316	405484	281655	279735	214080	258043	326506	315915	234106	200303	331400
P54108-3	CRISP3	Isoform 3 of Cysteine-rich secretory protein 3	3	104844	83681	25087.9	84641.9	23454.5	57074.2	85209.9	26486.3	63683	30318.5	106261	95162.7	136411	103404	67684.9	34597.3	84971.8	95406.5
P46108	CRK	Adapter molecule crk	2	195537	260085	240712	186245	276835	257757	192878	369518	215552	287556	216713	198231	198867	204331	206493	444022	194925	179229
P46109	CRKL	Crk-like protein	15	833730	980337	952331	876620	962115	980866	911717	925543	935726	952331	921644	860306	854692	829463	906964	1.09822e+06	929237	982535
Q8IUI8	CRLF3	Cytokine receptor-like factor 3	9	97819.4	108575	108713	115276	119403	115176	99787.3	110019	106386	110366	124903	105412	116378	108065	103624	132520	103627	113388
P02741	CRP	C-reactive protein	6	233650	227564	182795	1.52808e+06	194716	186021	332886	185920	284318	191781	302676	309957	292503	232985	1.87349e+06	212796	325302	415043
Q9NQ79	CRTAC1	Cartilage acidic protein 1	1	153741	138471	59822.9	133394	62780.7	48431.5	141421	52596.2	90830.1	59822.9	132369	138382	192334	182538	84784.2	62357.2	134585	127699
O75718	CRTAP	Cartilage-associated protein	6	162378	153938	179578	191781	196566	164644	191106	172402	182250	165181	168100	150699	158159	157946	178249	180647	167512	148866
Q53ET0	CRTC2	CREB-regulated transcription coactivator 2	1	22870.5	27646.9	32775.2	37891.1	38353	39682.6	32619.6	28710.8	29590.9	37891.1	31156.8	29587.5	23764.4	21082.7	30628.5	33721.3	34958.2	36047
Q9Y2S2	CRYL1	Lambda-crystallin homolog	8	134585	180505	135288	126347	204301	204162	106776	142155	174976	162070	126434	119001	171114	161910	142693	158834	157224	87971.2
Q14894	CRYM	Ketimine reductase mu-crystallin	7	99126	116559	284226	93600.1	232820	113243	125377	126442	141501	115108	203938	98655	128434	125056	109211	330273	112256	117218
Q08257	CRYZ	Quinone oxidoreductase	7	208405	195014	296708	199190	347457	286348	229595	388138	277001	317301	240552	233834	225514	274757	274358	320349	220649	244909
O95825	CRYZL1	Quinone oxidoreductase-like protein 1	7	169674	215283	335543	222614	309468	303799	195959	303537	242406	311990	207142	209015	190854	211725	236282	349332	194873	228953
O75390	CS	Citrate synthase, mitochondrial	14	1.05988e+06	358296	1.24578e+06	674602	1.34254e+06	1.27402e+06	543273	1.27879e+06	943071	1.23786e+06	472171	708980	691718	803271	865589	1.22566e+06	389520	660512
O75534-4	CSDE1	Isoform 4 of Cold shock domain-containing protein E1	11	139834	115033	214335	183321	222070	218624	171365	219106	188448	223003	120438	198120	112414	161609	213594	241973	103697	124733
P55060	CSE1L	Exportin-2	22	511819	544606	653252	521257	716079	757385	557349	676932	558369	670827	570217	537123	605780	516929	599134	631142	544606	487456
P41240	CSK	Tyrosine-protein kinase CSK	21	574038	593242	715073	596967	743091	705961	597428	711914	622779	687005	550511	593242	556301	549254	667553	769915	587790	595687
P48729-2	CSNK1A1	Isoform 2 of Casein kinase I isoform alpha	3	121055	180647	103547	119010	109031	105550	169063	89781.1	99433.8	100780	125829	136588	159762	142927	105116	112841	159132	163357
P68400	CSNK2A1	Casein kinase II subunit alpha	6	1.28242e+06	1.19852e+06	325511	1.07257e+06	286471	324273	1.47464e+06	354107	1.05195e+06	336589	1.37976e+06	1.27388e+06	1.50807e+06	1.26436e+06	1.371e+06	427448	1.26142e+06	1.23297e+06
P19784	CSNK2A2	Casein kinase II subunit alpha'	11	217884	277243	432042	333248	441644	432780	325940	416015	336589	408510	336031	262123	314551	282103	379930	502504	270229	260249
P67870	CSNK2B	Casein kinase II subunit beta	7	612761	667335	438722	694106	490380	430577	681861	380339	660012	477741	627001	583702	631566	606820	582913	473463	646314	651012
P21291	CSRP1	Cysteine and glycine-rich protein 1	12	494231	572752	590920	532972	615407	589083	510536	666646	566695	541824	563895	509308	497592	574343	512797	544415	603279	609655
P01034	CST3	Cystatin-C	3	217618	247622	84864.1	222152	104269	127028	240781	170517	184565	142609	261593	251730	243459	217194	221324	132045	229867	207799
P04080	CSTB	Cystatin-B	2	192159	150056	124715	142009	136366	103429	148487	126254	185920	136684	140679	134046	194596	166729	133581	109211	226572	153107
Q13363	CTBP1	C-terminal-binding protein 1	4	222606	231807	234931	216949	230922	228420	224144	252450	270651	239942	208415	229660	228827	217936	207721	277236	188924	239748
Q01459	CTBS	Di-N-acetylchitobiase	1	217646	223146	141870	196079	134649	143974	220616	126758	196649	147843	235395	209417	217646	226277	192145	181350	223850	198093
Q2NKJ3	CTC1	CST complex subunit CTC1	1	59929.9	99425.1	38901.6	88899.2	58360.9	58092.1	117761	99433.8	111404	91300.8	79501.4	82461.6	93986.9	70522.9	113323	77840.7	84287.1	90619.5
P29279	CTGF	Connective tissue growth factor	14	292285	366856	281137	277285	290701	321357	307369	313544	353263	345698	352183	261890	282806	271592	272319	487395	272163	280423
O43310-2	CTIF	Isoform 2 of CBP80/20-dependent translation initiation factor	2	67741.1	91536.3	49557.7	69938.7	66286.3	57502.2	82545.5	69053.6	55687.8	62248.6	94153.2	105358	65324.8	73120.7	54688	60457.2	89715.4	84764.9
O60716	CTNND1	Catenin delta-1	7	174084	161948	187692	198875	196200	179134	181927	190244	170103	176394	167775	165477	173344	172837	175063	171989	190561	169439
P17812	CTPS1	CTP synthase 1	13	269619	289494	354309	300875	359436	356156	286240	382935	333049	386671	280147	272236	287150	283428	312164	311412	278732	275996
Q9NRF8	CTPS2	CTP synthase 2	12	297250	303589	311656	309190	307065	287556	333325	278497	314448	272027	314115	286947	289549	304526	306117	286811	305556	290538
P10619	CTSA	Lysosomal protective protein	10	487579	553852	625617	687694	643908	599787	586775	788391	625617	693410	509480	567608	527145	600796	592557	929464	569445	646881
P07858	CTSB	Cathepsin B	3	182517	239009	151480	200067	309015	307240	202724	233847	211582	242777	171495	239223	213419	169125	219559	185844	188692	171622
P53634	CTSC	Dipeptidyl peptidase 1	8	436338	510059	563797	552038	524656	664701	460573	473136	511282	586598	500826	549456	464330	510753	487395	732385	533974	559026
P07339	CTSD	Cathepsin D	12	723166	648186	997318	927404	1.06281e+06	1.05029e+06	776447	1.20858e+06	771822	993966	756172	744179	731572	756172	829072	1.37573e+06	733828	711911
P08311	CTSG	Cathepsin G	6	554699	334339	253321	333633	200700	594066	303372	210283	305006	272665	582566	800055	351566	420983	410048	312164	287133	295096
P25774	CTSS	Cathepsin S	2	402561	324124	201096	167901	189808	279840	286745	311260	300668	272928	351381	455317	393018	400521	288971	430577	297535	300816
P56202	CTSW	Cathepsin W	6	79582.2	67594.2	58215.5	104460	163844	113013	94341.1	91124.1	92125.6	138138	91615.7	84229.5	65252.5	78777.8	91819.2	54170.4	59562.7	65668.7
Q14247	CTTN	Src substrate cortactin	25	1.09383e+06	1.25069e+06	1.29101e+06	1.31532e+06	1.42231e+06	1.34925e+06	1.29534e+06	1.70248e+06	1.4758e+06	1.53162e+06	1.1553e+06	1.1834e+06	1.04071e+06	1.04742e+06	1.10966e+06	1.29101e+06	1.25412e+06	1.35191e+06
Q13616	CUL1	Cullin-1	10	174974	163513	160206	171447	180390	161481	172011	158832	166466	157766	154548	171483	157428	164742	164848	143974	169302	146904
Q13617-2	CUL2	Isoform 2 of Cullin-2	16	416601	497326	470565	468986	453801	465261	495793	496067	512797	460790	468690	458500	429368	454622	477505	411443	492983	429093
Q13618	CUL3	Cullin-3	20	361245	512044	331878	380932	335543	334458	404528	322576	372074	320047	436038	391073	367728	387801	388998	329747	521839	390556
Q13619	CUL4A	Cullin-4A	11	267621	239714	137690	155959	143832	155777	187439	105020	218174	109132	170066	174420	170949	149312	267933	122915	170815	128922
Q13620	CUL4B	Cullin-4B	16	434036	414516	409287	347272	458343	416676	415662	422372	365683	362504	413482	386195	397586	423582	397677	421579	426387	391878
Q93034	CUL5	Cullin-5	9	540699	648473	447972	651226	500445	446880	679882	462139	585086	478610	610775	650060	609128	611330	527114	399014	645674	599046
O60888-2	CUTA	Isoform A of Protein CutA	3	262105	274158	464069	369838	504525	516490	283599	470565	384991	494785	260761	269889	234664	214033	316135	552400	286765	296612
P48061-4	CXCL12	Isoform Delta of Stromal cell-derived factor 1	2	321738	306839	277285	358890	408009	506294	329190	206684	425654	486900	276624	316084	311498	348525	365135	263484	353544	312849
P42830	CXCL5	C-X-C motif chemokine 5	1	274990	339828	295085	398268	385566	306117	331494	523742	398594	357800	320283	934963	349494	541655	340746	417796	332566	333206
P61073-2	CXCR4	Isoform 2 of C-X-C chemokine receptor type 4	3	163375	191354	266305	200529	267731	241973	180710	243780	213444	272319	182089	194598	166107	155271	182795	230660	170738	189673
Q8TB03	CXorf38	Uncharacterized protein CXorf38	1	132066	143285	85584.7	183707	95541.1	94737	141906	100189	151719	98740.9	144000	151785	149023	122558	131806	81605.4	125500	120577
P00167	CYB5A	Cytochrome b5	2	78159.7	26553	103826	76051.4	86899	101529	61642.3	75429	73388.8	96098.7	37864.8	59341.9	68701.7	70696.4	77840.7	81462.9	44296.7	62562.2
O43169	CYB5B	Cytochrome b5 type B	2	79907.2	106798	134724	85669.9	86970	118537	135074	113323	89702.2	97904.9	72127.1	137111	90170.8	107568	86731.5	97846.4	113081	108651
Q9UHQ9	CYB5R1	NADH-cytochrome b5 reductase 1	9	471684	374921	381648	399566	258776	410543	430236	306300	356757	338041	362354	489941	396008	371497	323545	280835	444572	382251
P00387-3	CYB5R3	Isoform 3 of NADH-cytochrome b5 reductase 3	13	487392	262999	1.03571e+06	449154	827036	982232	428809	886512	518837	897404	347500	441118	395608	398118	647337	840641	320227	383442
Q9BQA9	CYBC1	Cytochrome b-245 chaperone 1	3	282609	236013	392805	265294	360239	362504	246248	340027	302272	315614	256766	220666	300714	266204	294120	252427	261321	226934
P99999	CYCS	Cytochrome c	8	811916	1.03374e+06	1.45909e+06	1.12453e+06	1.59557e+06	1.6004e+06	808581	1.6895e+06	1.20474e+06	1.44595e+06	858817	916592	764336	889171	995460	2.18312e+06	1.00605e+06	1.19572e+06
Q7L576	CYFIP1	Cytoplasmic FMR1-interacting protein 1	46	2.05069e+06	2.40192e+06	3.06666e+06	2.57063e+06	3.13492e+06	2.78445e+06	2.94103e+06	3.0423e+06	2.5935e+06	2.89354e+06	2.34227e+06	2.6618e+06	2.32778e+06	2.62462e+06	2.53368e+06	2.43558e+06	2.50533e+06	2.05069e+06
Q9NQC7	CYLD	Ubiquitin carboxyl-terminal hydrolase CYLD	4	154225	129431	99970.7	119308	111566	107305	194083	126112	104587	100546	149005	244360	182031	139942	111222	125140	144407	199312
Q99418	CYTH2	Cytohesin-2	11	500416	595657	441081	333049	457813	435118	390074	347771	350309	457290	768471	443983	533010	573265	368631	343278	461020	427296
Q9NWV4	CZIB	CXXC motif containing zinc binding protein	6	272354	345614	423496	384991	451149	433992	348055	383948	410937	425026	333561	300906	336244	326083	356757	535162	316066	319394
Q9Y4D1	DAAM1	Disheveled-associated activator of morphogenesis 1	28	1.02179e+06	681619	759210	883762	650332	897404	754567	739480	630655	618933	532674	789158	695191	801463	632402	591676	642749	706706
P98082	DAB2	Disabled homolog 2	11	474658	596331	628310	496067	651226	621608	520228	658849	543050	678793	466265	516070	489147	537872	535582	736317	519720	574616
P61803	DAD1	Dolichyl-diphosphooligosaccharide--protein glycosyltransferase subunit DAD1	2	206953	78489	407321	208978	323751	443178	195567	324095	282242	369518	167382	148436	197192	194374	234692	233406	155899	211726
Q14118	DAG1	Dystroglycan	8	130969	127208	216631	143078	169103	221856	129228	203997	143712	221324	114939	110531	126332	106517	144707	238394	117859	126117
P51397	DAP	Death-associated protein 1	1	9304.91	11151.4	4483.18	8248.71	4103.83	6049.37	9304.91	3708.38	5909.98	4483.18	11151.4	11151.4	5727.1	11151.4	3159.56	5262.47	23815.9	14619.5
Q9UN19	DAPP1	Dual adapter for phosphotyrosine and 3-phosphotyrosine and 3-phosphoinositide	10	354310	423905	408814	378076	466801	391198	412895	445570	396823	395690	456411	408579	422152	407793	382935	456966	410009	432678
P14868	DARS	Aspartate--tRNA ligase, cytoplasmic	25	1.04423e+06	1.18872e+06	799594	1.13079e+06	906964	850144	1.16321e+06	890374	1.11535e+06	888694	1.10779e+06	1.08883e+06	1.19716e+06	1.21584e+06	1.06975e+06	881291	1.20321e+06	1.10407e+06
Q6PI48	DARS2	Aspartate--tRNA ligase, mitochondrial	9	690738	224446	418953	381374	503202	410048	261464	426414	403121	441771	244252	333986	406302	422131	405216	441644	183151	265352
Q96EP5	DAZAP1	DAZ-associated protein 1	3	414392	455966	397459	346572	384991	402547	385137	406781	352751	355213	433130	351262	459859	389630	406316	386671	421264	429375
P07108-5	DBI	Isoform 5 of Acyl-CoA-binding protein	3	275416	407689	246090	314826	254700	227468	276020	205519	336100	258465	391000	363820	307053	319284	292880	281137	353070	349809
Q16643-3	DBN1	Isoform 3 of Drebrin	14	162660	263049	285947	273436	376452	214060	257950	186901	244656	323341	249359	251828	181098	228568	208041	253483	321322	272430
P61962	DCAF7	DDB1- and CUL4-associated factor 7	3	70444.3	75313.7	94606.2	84864.1	81014.6	88899.2	80655.7	79621.9	81233.4	82147.8	125439	75151.8	97889.5	79102.1	80675.4	94309	87999	78956.2
P81605-2	DCD	Isoform 2 of Dermcidin	3	366761	410069	283417	405484	362201	261635	310554	308405	264517	347925	328960	308884	378391	433836	311260	291778	366369	261448
P32321-2	DCTD	Isoform 2 of Deoxycytidylate deaminase	4	244326	278763	177806	227931	191781	195022	260353	269522	207434	216631	253140	252326	260065	237874	223072	252629	256565	275337
Q14203	DCTN1	Dynactin subunit 1	41	788506	905201	993966	898502	990463	956721	843240	1.16864e+06	879498	985902	827873	890836	745804	829805	790292	958532	835638	869463
Q13561-2	DCTN2	Isoform 2 of Dynactin subunit 2	17	791463	841516	1.46388e+06	715073	1.63994e+06	1.28737e+06	791463	1.6004e+06	1.03409e+06	1.44357e+06	808427	846446	758893	781002	927404	1.69718e+06	789173	934117
O75935	DCTN3	Dynactin subunit 3	10	588745	673128	691718	641033	715073	636110	628261	705024	678793	682344	589673	630737	585236	606753	559070	629070	651651	711787
Q9UJW0-3	DCTN4	Isoform 3 of Dynactin subunit 4	5	3.32238e+06	3.85039e+06	6.06176e+06	3.78106e+06	6.06176e+06	5.80322e+06	3.96184e+06	9.60708e+06	4.28968e+06	5.15052e+06	3.38063e+06	3.99893e+06	3.45113e+06	3.68097e+06	3.78106e+06	1.04277e+07	4.16376e+06	4.01922e+06
Q9BTE1	DCTN5	Dynactin subunit 5	3	38428.7	48748	72295.7	65510.2	78027.2	70525.2	45684.9	69825.2	62138.7	69825.2	52259.6	48748	44841.1	42187.1	64071.5	76106.6	48496.2	56127.6
O00399	DCTN6	Dynactin subunit 6	2	152306	212240	155917	160713	172027	162511	181949	187167	158941	179387	175546	187286	138277	159083	158773	182905	182731	214765
Q96GG9	DCUN1D1	DCN1-like protein 1	4	134780	196325	264517	209602	273436	264517	199028	220566	225828	259462	230937	201611	225036	212207	217417	236103	199028	248654
Q7Z4W1	DCXR	L-xylulose reductase	9	282990	272214	301399	300355	338425	292057	270434	306679	301558	302272	279857	261079	269895	343094	288243	334458	274639	277206
O95865	DDAH2	N(G),N(G)-dimethylarginine dimethylaminohydrolase 2	6	132369	185720	222590	200306	237570	241676	214765	238039	229385	256502	156198	169452	183299	137320	205778	189029	155373	123419
Q16531	DDB1	DNA damage-binding protein 1	27	1.0024e+06	1.06178e+06	943071	1.08658e+06	1.00661e+06	964422	1.0292e+06	1.11245e+06	1.13553e+06	1.01294e+06	1.07444e+06	1.05919e+06	1.0292e+06	1.09257e+06	990463	1.08099e+06	1.04486e+06	1.14813e+06
O94830	DDHD2	Phospholipase DDHD2	6	128720	128720	128309	154248	131859	133012	128720	141052	148492	137402	365865	328582	128720	128720	138762	135292	128720	128720
Q5TDH0-3	DDI2	Isoform 3 of Protein DDI1 homolog 2	7	128856	167295	201216	158658	165181	194131	180021	213213	201333	207708	164604	146371	184563	167030	177007	239359	185799	144227
P39656	DDOST	Dolichyl-diphosphooligosaccharide--protein glycosyltransferase 48 kDa subunit	9	693826	469709	1.46836e+06	736317	1.15203e+06	1.5111e+06	642364	1.30255e+06	910937	1.32809e+06	480786	659737	584066	607650	819728	805539	532383	548997
Q96HY6	DDRGK1	DDRGK domain-containing protein 1	5	48454.8	56745.4	105550	76995.9	115001	136366	70866.2	134526	75927.4	101123	48755.2	94447.7	68396.7	46100.1	76379.8	102354	55487	65980.3
P30046	DDT	D-dopachrome decarboxylase	3	2.03413e+06	2.82815e+06	4.89953e+06	2.91821e+06	5.15052e+06	4.74186e+06	2.78662e+06	4.56781e+06	3.19343e+06	4.6593e+06	2.5124e+06	2.68952e+06	2.30445e+06	2.82815e+06	2.91821e+06	4.34465e+06	2.74499e+06	3.56944e+06
Q92499	DDX1	ATP-dependent RNA helicase DDX1	17	436047	510265	577675	550892	579934	579934	512812	594754	509860	596967	546963	541556	491867	590598	588745	556752	526448	496739
Q92841	DDX17	Probable ATP-dependent RNA helicase DDX17	6	160908	142184	142445	144119	138844	165030	136643	219770	129117	130279	162356	153505	148155	134896	150855	131286	164328	106914
Q9UMR2	DDX19B	ATP-dependent RNA helicase DDX19B	16	635115	647733	560477	569778	600165	543050	638238	645994	567085	561228	639473	649042	607872	624232	543900	565743	597758	670625
O00571	DDX3X	ATP-dependent RNA helicase DDX3X	13	319519	375102	598580	450809	797549	537139	395486	442512	415432	657376	368582	326639	355382	354440	439563	555955	322224	305327
P17844	DDX5	Probable ATP-dependent RNA helicase DDX5	4	91034.9	58594.8	16792.3	35464.9	18940.8	27767	63161.7	26824.5	39142.8	16647.7	43109.6	92158.3	63916.3	94222.7	35958.6	15295.8	65722.9	46870
P26196	DDX6	Probable ATP-dependent RNA helicase DDX6	8	394500	435720	338425	418953	370281	363290	492523	343278	405216	396306	438392	458530	457617	482215	420668	350309	517612	400205
Q16698	DECR1	2,4-dienoyl-CoA reductase, mitochondrial	11	325754	125452	369252	232308	392805	384565	196826	332404	296584	378716	174691	224935	213098	216223	310703	374525	156696	174825
Q9H4E7	DEF6	Differentially expressed in FDCP 6 homolog	4	492478	462426	186123	442512	194017	216631	439874	180647	420355	205760	484947	393826	530939	437745	427448	188448	579182	513441
P59665	DEFA1	Neutrophil defensin 1	3	4.89831e+06	2.933e+06	2.71306e+06	3.96204e+06	2.04467e+06	1.39819e+07	2.38758e+06	3.22028e+06	2.66674e+06	2.15478e+06	3.46319e+06	4.46004e+06	2.77011e+06	3.46907e+06	2.21508e+06	7.636e+06	2.89374e+06	3.04177e+06
Q68D51	DENND2C	DENN domain-containing protein 2C	8	163823	195234	108051	131038	108939	125875	197853	116259	145106	124378	184955	160894	208928	173250	154169	130868	174326	170535
A2RUS2	DENND3	DENN domain-containing protein 3	17	548957	617587	945827	755183	1.09055e+06	825927	635657	766307	711914	899824	600841	596378	576147	638534	714524	640050	622247	560134
Q7Z401-2	DENND4A	Isoform 2 of C-myc promoter-binding protein	4	199669	211681	165332	255345	151918	143832	206656	140935	214784	152058	216563	170724	208813	177163	229343	147384	244933	196622
Q5VZ89-7	DENND4C	Isoform 2 of DENN domain-containing protein 4C	7	201014	215050	213074	188901	192782	171526	229817	184464	187580	198445	174577	193315	192863	205311	209862	180390	207177	189180
O43583	DENR	Density-regulated protein	5	162308	182507	152228	173039	161226	161045	173331	167845	160262	164725	172079	159875	168978	162958	149108	171155	183469	193815
Q9Y315	DERA	Deoxyribose-phosphate aldolase	10	377880	367244	617216	499053	556366	570793	461204	546389	520976	535162	365163	320637	374286	446105	501117	456152	340658	307229
P23743	DGKA	Diacylglycerol kinase alpha	9	292547	381045	323545	322268	355457	336982	337548	364426	337360	331168	331963	366250	300842	286156	351233	312905	325160	331717
Q16760	DGKD	Diacylglycerol kinase delta	2	84618.5	119374	55932.7	136594	63345.6	50361.7	121371	47943.8	80154.2	59852.5	106864	111447	106982	115050	80475.2	43889.2	118294	122326
P49619	DGKG	Diacylglycerol kinase gamma	15	248563	286469	277857	214932	235332	282476	262417	211416	215389	269944	251368	285572	245003	226325	241973	217417	237812	267778
Q13574	DGKZ	Diacylglycerol kinase zeta	4	134309	116895	191781	212207	291652	168834	93344.3	146600	140829	229149	112941	114942	123497	137365	123886	146780	118707	104300
Q16854	DGUOK	Deoxyguanosine kinase, mitochondrial	1	97844.6	46525.4	51416.7	41714.9	52118.3	44882.8	58099.9	280055	57915	56914	58615.6	66081.7	65328.3	73959.1	37363.3	151274	41887.5	57069.7
Q9BTZ2	DHRS4	Dehydrogenase/reductase SDR family member 4	3	355073	252229	441644	307240	432780	367965	254159	373636	379489	404631	282184	266625	265637	286864	332648	413345	259602	321670
Q9Y394	DHRS7	Dehydrogenase/reductase SDR family member 7	8	177342	46641.3	305423	92670.6	346267	319573	93286	268577	127625	286110	63815.1	92243.9	78053.2	104357	177184	326166	56936.4	69793.9
Q7Z478	DHX29	ATP-dependent RNA helicase DHX29	14	403324	403065	292057	358726	323098	289442	440479	342590	334707	316880	430991	405886	431270	405173	377028	303537	446899	404848
Q08211	DHX9	ATP-dependent RNA helicase A	9	278752	278752	334458	298009	417014	378076	475888	427205	269522	464777	307811	307560	366265	361887	263706	464777	303300	294691
Q9NR28	DIABLO	Diablo homolog, mitochondrial	7	337349	351684	202541	296923	208641	203887	346769	207244	297791	187442	403276	389350	415753	345932	251874	248648	377849	378551
O60610	DIAPH1	Protein diaphanous homolog 1	47	1.80404e+06	2.09576e+06	2.55371e+06	2.11639e+06	2.24947e+06	2.30297e+06	1.89793e+06	3.02858e+06	2.15478e+06	2.64925e+06	1.84784e+06	2.19309e+06	1.62148e+06	1.5887e+06	2.18312e+06	2.39191e+06	1.93516e+06	2.04675e+06
Q8NDZ4	DIPK2A	Divergent protein kinase domain 2A	4	84281.7	82485.7	101757	121542	144218	117105	75463.7	87530.7	108207	121909	85865.2	73586	81150.2	72635.9	84924.6	94051.1	89794.3	80947.1
Q8IYB7	DIS3L2	DIS3-like exonuclease 2	3	95256.3	115038	172732	116259	145951	161800	117514	98674.9	120061	139913	114869	108152	107499	116658	118075	115045	112277	124237
P09622	DLD	Dihydrolipoyl dehydrogenase, mitochondrial	14	1.15939e+06	382021	474950	693410	504075	573007	539819	517949	673348	538689	540415	626113	677853	731959	617716	570793	393401	577553
Q12959-2	DLG1	Isoform 2 of Disks large homolog 1	4	289105	186731	270804	211674	278258	259645	232268	223158	233990	249997	146144	152945	141872	104585	226807	294939	178134	155314
Q92796	DLG3	Disks large homolog 3	1	375676	187449	80075.8	240030	83092.5	82858.4	204032	124715	125757	68900	302319	152402	316835	381752	123944	143712	208936	336534
Q9Y2H0	DLGAP4	Disks large-associated protein 4	8	291360	267357	316365	255897	288316	326842	299241	303365	251851	318896	284777	286798	238474	248413	242825	361399	253557	299660
P36957	DLST	Dihydrolipoyllysine-residue succinyltransferase component of 2-oxoglutarate dehydrogenase complex, mitochondrial	9	171629	57970.2	163573	122537	136472	182681	63834.4	130042	118537	139740	73343.7	120797	75770.3	56552.7	126930	132882	49197.7	55337
Q08495	DMTN	Dematin	16	665946	759167	649143	660012	668444	631936	716740	601296	658257	742234	611150	692535	644788	639061	579934	617716	721665	797815
Q9Y485	DMXL1	DmX-like protein 1	6	127288	167353	125657	137574	140101	126758	149779	111642	129537	114951	146902	181475	122722	129311	161692	97614.5	131562	132167
P31689	DNAJA1	DnaJ homolog subfamily A member 1	6	916930	912494	1.43833e+06	434405	172402	2.09604e+06	850634	885004	1.20245e+06	789563	941926	1.02045e+06	850634	927206	1.30948e+06	851226	954616	954155
O60884	DNAJA2	DnaJ homolog subfamily A member 2	7	292823	374359	463209	416676	460790	425405	435775	441771	445919	456152	360438	421161	298295	324643	466801	374224	424902	515383
P25685	DNAJB1	DnaJ homolog subfamily B member 1	10	1.03833e+06	1.12299e+06	631142	1.20245e+06	688202	618933	1.07257e+06	663429	999088	585086	1.10317e+06	973987	1.33785e+06	1.11582e+06	789563	643908	1.10775e+06	1.10317e+06
Q9UBS4	DNAJB11	DnaJ homolog subfamily B member 11	9	135225	133291	143463	156704	158239	145543	139650	129612	150522	156704	145503	121234	124188	132429	144599	147101	116001	167810
P25686	DNAJB2	DnaJ homolog subfamily B member 2	5	133080	133291	156560	134796	173571	164228	128907	141361	145865	151179	109420	115180	93775.4	101401	110582	134297	105762	115938
O75190	DNAJB6	DnaJ homolog subfamily B member 6	3	629803	848601	607496	616361	647763	656185	785992	632402	598256	629070	814317	787695	607767	703656	712747	507519	734609	698654
Q96KC8	DNAJC1	DnaJ homolog subfamily C member 1	1	386793	287872	68599.5	222415	61078	70629.6	405974	63819.1	227123	72407.8	371264	360554	354725	382514	187146	42069.9	404397	380118
Q8IXB1	DNAJC10	DnaJ homolog subfamily C member 10	3	138819	127261	131198	158588	150855	139740	127728	124677	157966	145663	138250	137370	161556	159326	123527	123009	135641	195493
O75165	DNAJC13	DnaJ homolog subfamily C member 13	16	268897	260228	277682	282889	244044	277001	281865	267201	259940	262100	256288	308339	248104	284222	265832	227468	260228	231316
Q13217	DNAJC3	DnaJ homolog subfamily C member 3	17	496172	626908	476675	545413	533576	556366	567361	474738	524332	494325	541724	556219	484389	605066	497367	495469	542911	656682
O75061-2	DNAJC6	Isoform 2 of Putative tyrosine-protein phosphatase auxilin	1	160725	193476	206918	236523	237284	226434	180505	223220	180939	179459	164361	171114	179663	179872	198942	196990	170303	133030
Q99615	DNAJC7	DnaJ homolog subfamily C member 7	11	151078	213171	147270	254700	162837	146974	261562	142445	176553	146876	232676	215340	207747	206531	197090	136305	245541	241510
O75937	DNAJC8	DnaJ homolog subfamily C member 8	5	605381	617166	453027	510181	536300	445969	503955	460614	476486	505712	520240	595579	487339	572651	504612	474377	576700	710396
Q8WXX5	DNAJC9	DnaJ homolog subfamily C member 9	5	261935	256332	249350	221324	241014	252882	207701	271412	240030	264935	241783	241090	278638	232176	237166	284741	225514	245955
O00115	DNASE2	Deoxyribonuclease-2-alpha	1	124126	118132	117709	105947	125061	94530.4	149714	100921	105550	98674.9	125495	110902	94434.5	128217	91889.5	141361	112797	105381
Q05193	DNM1	Dynamin-1	25	496286	486841	518837	449926	532390	554699	496286	506294	482370	508296	476699	464731	448239	485677	444755	609142	482583	517872
P50570	DNM2	Dynamin-2	31	1.15531e+06	1.21225e+06	1.569e+06	1.28405e+06	1.40168e+06	1.42605e+06	1.29469e+06	1.5461e+06	1.371e+06	1.36622e+06	1.16458e+06	1.27801e+06	1.15857e+06	1.1921e+06	1.27043e+06	1.42982e+06	1.25554e+06	1.11697e+06
Q9ULA0	DNPEP	Aspartyl aminopeptidase	5	114427	148879	230822	176394	225235	218514	175836	213761	173094	208641	142606	159287	137629	166484	195197	245242	126831	152104
O43598	DNPH1	2'-deoxynucleoside 5'-phosphate N-hydrolase 1	3	66081.7	78386.5	78177.2	77932.5	80313.7	76326.7	51420.2	83862.4	68258.3	81140.7	88323.7	57309.8	63334.5	64764.7	57915	81233.4	65604.3	56681.2
Q96BY6	DOCK10	Dedicator of cytokinesis protein 10	19	410577	379227	544415	423750	455919	471217	369529	451909	385566	436103	363755	386630	412671	478216	385566	401574	422264	328958
Q5JSL3	DOCK11	Dedicator of cytokinesis protein 11	22	347916	353385	502504	340296	427448	445570	350652	574433	373358	493354	328625	399695	323800	357809	385740	446555	387643	305771
Q92608	DOCK2	Dedicator of cytokinesis protein 2	8	182708	229782	154850	156813	172732	172732	164438	190177	167459	149823	186332	189485	166329	178155	172402	132364	172444	168631
Q9H7D0	DOCK5	Dedicator of cytokinesis protein 5	26	750283	790919	699378	699378	708914	672458	827232	674602	687694	645021	778106	713099	837440	781023	701938	620467	864148	676059
Q96N67	DOCK7	Dedicator of cytokinesis protein 7	6	65484.1	73070.9	76326.7	69501.8	83823.7	101402	72111.6	67986.9	69501.8	67257.8	69946.3	77153.5	65664.7	59532.4	68143.4	61078	80549.3	66528.4
Q8NF50	DOCK8	Dedicator of cytokinesis protein 8	25	386356	536037	527114	653802	534696	578825	610290	541048	557539	473136	759131	509532	845125	603392	485194	498641	808986	545500
Q99704	DOK1	Docking protein 1	13	498160	428235	230358	336589	253483	233730	481075	228180	378423	321357	511067	455393	528727	480126	334267	268162	471771	511067
O60496	DOK2	Docking protein 2	14	839082	1.05805e+06	590130	913766	473136	538689	994153	554290	870941	557539	953766	798745	949867	1.00131e+06	835536	524332	1.12856e+06	1.01476e+06
Q7L591	DOK3	Docking protein 3	11	508264	598615	467231	530890	488243	492873	606706	459281	523742	499609	602250	555170	607514	536115	520690	456656	569488	582607
Q7L8W6	DPH6	Diphthine--ammonia ligase	1	115857	125960	32963.6	76809.5	18694.5	21899.9	142054	22924	63958.4	20977.7	101118	127538	108826	118523	93960.7	27364.5	130095	109226
O60762	DPM1	Dolichol-phosphate mannosyltransferase subunit 1	6	728791	354172	364426	317301	384565	412532	244717	427448	304051	431391	288246	365747	295936	378039	304216	346959	174622	446812
Q9NY33	DPP3	Dipeptidyl peptidase 3	18	573920	653075	660808	590577	628310	645994	639290	610018	610018	616049	592004	568520	594673	623662	585086	662849	620775	594673
Q9UHL4	DPP7	Dipeptidyl peptidase 2	10	280479	232383	400582	337166	377028	303687	289959	256389	336982	420668	292561	260837	368080	330328	314944	420047	276074	280080
Q86TI2-2	DPP9	Isoform 2 of Dipeptidyl peptidase 9	5	240697	280401	286348	244112	271552	282670	252794	273436	251037	282242	276198	266070	279565	261680	247428	292242	273255	262631
Q12882	DPYD	Dihydropyrimidine dehydrogenase [NADP(+)]	16	351012	424194	378076	367965	407321	370810	359262	395942	342590	337754	348288	401537	326718	358665	344071	357035	383018	352202
Q16555	DPYSL2	Dihydropyrimidinase-related protein 2	19	582175	689623	668444	486150	553248	591676	486871	616715	590920	641820	669326	558424	515309	505125	560477	628310	566707	580739
Q01658	DR1	Protein Dr1	1	68226.6	51213.6	73388.8	91889.5	86637.2	103826	52951.7	155664	87586.2	99715.4	58534.1	71780.3	40697.6	80482.4	83355.2	104692	84725.1	55892.7
Q9Y295	DRG1	Developmentally-regulated GTP-binding protein 1	2	76744.3	88924.5	96098.7	71056.2	106847	100873	69989.7	115001	81938.5	102789	87166.4	101280	69615.6	82579.8	79476.4	130486	69218.3	95336.1
P55039	DRG2	Developmentally-regulated GTP-binding protein 2	7	315361	412104	456152	351076	428649	401257	345621	472569	350537	411699	411910	363576	351847	360110	363508	364426	370368	428591
P15924	DSP	Desmoplakin	2	200771	170135	145543	162938	144382	108390	148085	110121	146228	162837	187768	152388	183873	177635	222070	173094	203560	131005
P60981	DSTN	Destrin	11	543402	557600	694544	521624	569190	581131	490232	679745	551419	571169	525929	553918	482525	525929	520425	691718	585672	676851
Q8TEA8	DTD1	D-aminoacyl-tRNA deacylase 1	4	112775	182731	169688	210003	171698	176525	216476	183521	172447	194459	165078	154473	160043	144105	177820	225761	175209	152982
Q8TDB6	DTX3L	E3 ubiquitin-protein ligase DTX3L	5	230107	233893	81186.9	143160	85929.2	87822.9	242270	82777.2	129951	116091	312260	186105	236439	143062	118260	75767.2	224919	160892
P23919	DTYMK	Thymidylate kinase	11	513314	573167	633821	543050	680377	626037	593065	525559	580348	644421	565337	590212	554180	506214	579284	590920	605867	600567
Q9NRW4-2	DUSP22	Isoform 2 of Dual specificity protein phosphatase 22	5	141258	137315	234279	165332	193098	171155	158481	178432	158472	187316	148560	157355	160333	186353	179578	247428	151757	155550
Q9BVJ7	DUSP23	Dual specificity protein phosphatase 23	5	245767	241573	352979	243881	408814	276597	239510	267731	271412	354309	218762	235055	228875	227990	231957	299608	226104	195384
P51452	DUSP3	Dual specificity protein phosphatase 3	7	775018	835795	983710	816828	1.03827e+06	908648	805460	1.19929e+06	868318	1.09055e+06	863764	814011	917363	864189	765587	1.1468e+06	882385	855225
Q7RTS9	DYM	Dymeclin	1	64326.4	74424.2	100159	109312	108562	87372	89675.5	103624	80475.2	105487	71441.6	72946.9	68942.5	68819.3	98939.5	94805.8	73608	66025.7
Q14204	DYNC1H1	Cytoplasmic dynein 1 heavy chain 1	95	1.25885e+06	1.3212e+06	1.9231e+06	1.4758e+06	2.64925e+06	1.42231e+06	2.00927e+06	1.5362e+06	1.545e+06	2.03019e+06	1.65218e+06	1.43013e+06	1.58633e+06	1.57585e+06	1.47891e+06	1.1418e+06	1.16137e+06	1.12372e+06
O14576	DYNC1I1	Cytoplasmic dynein 1 intermediate chain 1	2	174108	301383	311885	248794	325966	225612	314675	254921	236937	283794	308378	246411	294977	178695	245242	336589	279343	233612
Q9Y6G9	DYNC1LI1	Cytoplasmic dynein 1 light intermediate chain 1	13	375517	483895	459771	443697	511692	377850	574605	405484	436103	449381	521196	451497	521196	474656	398594	345698	467205	419457
P63167	DYNLL1	Dynein light chain 1, cytoplasmic	4	231435	238403	220566	256796	243430	230552	320588	214932	257003	236484	223891	290193	247151	190392	228373	203251	273965	282513
Q96FJ2	DYNLL2	Dynein light chain 2, cytoplasmic	4	195249	198391	241535	224734	244252	236009	183840	260782	254084	235864	198865	186638	203782	189322	198445	294588	196824	186638
Q13627	DYRK1A	Dual specificity tyrosine-phosphorylation-regulated kinase 1A	3	164942	182493	195197	181259	196372	202431	190374	169408	203139	201000	166329	182493	171647	177525	179522	164973	175635	199354
P42892	ECE1	Endothelin-converting enzyme 1	17	546492	275818	665768	376452	583956	684012	351862	530418	376115	505939	301889	302503	351094	353018	372873	532390	302130	375650
Q13011	ECH1	Delta(3,5)-Delta(2,4)-dienoyl-CoA isomerase, mitochondrial	10	351461	287115	601946	452290	370810	598256	397408	601946	606883	549164	365217	447074	494551	482141	496067	643363	283661	366606
Q9NTX5	ECHDC1	Ethylmalonyl-CoA decarboxylase	6	223407	180232	186976	198167	180647	186580	193154	150586	203997	177079	172443	199065	187733	225669	225726	154326	158988	152675
P30084	ECHS1	Enoyl-CoA hydratase, mitochondrial	9	1.64019e+06	1.51162e+06	309190	894102	330067	346959	2.4436e+06	368631	819029	342148	1.67825e+06	1.12991e+06	1.7166e+06	1.83043e+06	985902	384805	1.81642e+06	1.3117e+06
Q16610-4	ECM1	Isoform 4 of Extracellular matrix protein 1	11	638513	747654	248447	565743	326797	258036	601495	284440	499053	294400	603148	537107	670432	553761	502504	310363	779042	518095
Q5VYK3	ECPAS	Proteasome adapter and scaffold protein ECM29	15	142334	145491	263872	240381	256389	239868	217300	233048	213976	242534	144783	128576	146199	242666	251112	237389	147417	120228
Q96F86	EDC3	Enhancer of mRNA-decapping protein 3	2	46093.2	62703.5	29281.7	38993.4	29925.8	31831	39898.2	33487.5	36101.2	33599.1	54515	41734.3	50278.1	56671.7	40966.5	31747.9	61460.9	46093.2
Q6P2E9	EDC4	Enhancer of mRNA-decapping protein 4	5	137445	206438	105116	153998	108677	101330	165566	108713	136594	109493	163820	139380	128898	145763	118671	114398	190550	179458
O60869	EDF1	Endothelial differentiation-related factor 1	1	25437.9	27400.4	26029.3	32963.6	35958.6	26486.3	27223.2	39339.7	24157.9	31242	23310.4	24761.6	29831.9	28000.6	34513.5	36208.6	29107.5	37293.6
Q15075	EEA1	Early endosome antigen 1	31	351436	435979	416394	396518	426054	426414	384259	458187	380615	438344	382831	379533	399866	459020	360875	459281	384259	445501
P68104	EEF1A1	Elongation factor 1-alpha 1	17	1.06489e+06	949630	1.21702e+06	1.19929e+06	1.57384e+06	1.40318e+06	1.04618e+06	1.43833e+06	1.13847e+06	1.43326e+06	964909	1.06489e+06	980757	995827	1.15695e+06	1.44595e+06	901644	1.07136e+06
P24534	EEF1B2	Elongation factor 1-beta	8	1.49086e+06	1.41634e+06	1.41819e+06	1.36622e+06	1.48238e+06	1.48673e+06	1.3165e+06	1.43675e+06	1.42605e+06	1.57384e+06	1.40126e+06	1.26506e+06	1.49086e+06	1.21874e+06	1.32306e+06	1.55068e+06	1.46233e+06	1.44265e+06
P29692-2	EEF1D	Isoform 2 of Elongation factor 1-delta	9	730603	768026	716079	644421	687005	694106	691319	741342	665768	694106	837112	765561	744698	777750	634817	699378	817178	904546
P26641-2	EEF1G	Isoform 2 of Elongation factor 1-gamma	18	809930	919287	1.2607e+06	909665	1.25852e+06	1.19384e+06	897255	1.33057e+06	921194	1.26313e+06	881147	941940	780540	837737	1.19929e+06	1.20474e+06	922528	1.07736e+06
P13639	EEF2	Elongation factor 2	28	587314	683093	507519	610660	621608	685419	609265	606883	554290	606469	650719	904468	608429	717606	662849	660012	571028	677691
P57772	EEFSEC	Selenocysteine-specific elongation factor	7	191546	203741	237726	248006	240879	238394	201671	228990	246090	234279	270430	202923	243789	206697	235469	219651	214307	194235
Q12805	EFEMP1	EGF-containing fibulin-like extracellular matrix protein 1	13	194036	245581	123299	178083	125490	123407	185253	174994	168316	145106	191385	208461	211097	214418	163844	172965	224868	219124
Q96C19	EFHD2	EF-hand domain-containing protein D2	2	40254.1	51862.3	54688	56231.6	59366.7	64164.7	38118.8	41966.6	34263.2	33341.2	69529.5	74924.4	40497.6	38070.8	43806	78411.4	52359	41041.6
Q7Z2Z2	EFL1	Elongation factor-like GTPase 1	11	346234	422552	405760	345883	401864	418720	362233	468986	347925	361269	374256	350632	378649	343456	352979	477741	394685	635798
P98172	EFNB1	Ephrin-B1	7	301287	223188	233406	303799	299608	299405	174100	344071	308405	333248	287021	191457	233403	183169	289124	327060	229324	245719
P01133	EGF	Pro-epidermal growth factor	14	410311	323822	477165	345183	535162	499609	328028	598256	406316	588010	309146	361505	362595	323822	350309	454975	339019	388833
Q8NDI1	EHBP1	EH domain-binding protein 1	3	13370.3	10976.7	17262.8	10829.8	15483.3	15681.4	10976.7	13084.8	8459.04	14595.6	10882.4	11281.1	14077.3	14236.3	14595.6	16792.3	13153.8	9990.47
Q8N3D4	EHBP1L1	EH domain-binding protein 1-like protein 1	11	302251	297976	167283	232820	162096	155258	288018	136172	201655	154727	306095	277273	261061	233647	199439	149437	273118	287612
Q9H4M9	EHD1	EH domain-containing protein 1	33	1.39522e+06	1.55145e+06	1.86434e+06	1.45909e+06	1.9469e+06	1.83067e+06	1.57731e+06	2.22733e+06	1.5461e+06	1.86434e+06	1.34671e+06	1.58584e+06	1.32748e+06	1.43323e+06	1.57832e+06	1.93025e+06	1.54624e+06	1.43323e+06
Q9NZN3	EHD3	EH domain-containing protein 3	31	627968	727015	790292	718953	792696	792696	692782	819029	757385	790292	630792	640968	583958	640968	733614	823078	694008	614347
Q9H223	EHD4	EH domain-containing protein 4	19	182145	224495	251515	188448	232441	220391	191793	219651	198167	242648	176589	214203	179402	179703	220566	211582	169159	180576
Q08426	EHHADH	Peroxisomal bifunctional enzyme	7	307142	358525	270064	381165	340296	262714	317707	331055	323751	294796	302735	412619	303465	417390	352068	283711	334533	325841
P47813	EIF1AX	Eukaryotic translation initiation factor 1A, X-chromosomal	3	114864	129089	139332	131653	158658	128562	115994	157080	137102	150700	129689	101126	115348	112557	127213	158658	113685	132290
O60739	EIF1B	Eukaryotic translation initiation factor 1b	3	75822	103822	39235	75199.7	46139.8	45747.9	72222.4	43718.4	59100.8	40602.9	97664.2	75621.1	74805.7	94974.7	76051.4	51601.1	84621.4	100756
Q9BY44	EIF2A	Eukaryotic translation initiation factor 2A	8	274476	302592	324273	316135	343109	339562	298990	355948	331419	342333	286835	313204	275136	275136	350690	337360	304937	281385
P19525	EIF2AK2	Interferon-induced, double-stranded RNA-activated protein kinase	5	417338	373303	391539	467606	439090	446555	434109	390364	427205	445570	537461	417715	456340	436222	475968	386354	370782	351765
Q14232	EIF2B1	Translation initiation factor eIF-2B subunit alpha	8	328167	402458	546711	519275	566695	577912	433085	418953	509482	513665	426754	404234	361456	409927	452290	418276	384469	439320
P49770	EIF2B2	Translation initiation factor eIF-2B subunit beta	4	347387	377177	452900	369010	428004	484337	408593	445919	406032	1.03105e+06	411374	405221	376583	462990	367203	467231	363224	368895
Q9NR50	EIF2B3	Translation initiation factor eIF-2B subunit gamma	4	381034	498315	455277	513665	690486	580691	432150	798405	574433	616361	502159	461392	499913	404130	481279	887755	508372	518882
Q9UI10-2	EIF2B4	Isoform 2 of Translation initiation factor eIF-2B subunit delta	6	84824.9	75659.3	67986.9	88858.1	72475.1	64847.3	77055.8	83629.3	84695.4	68686.1	84951.5	65519.6	81500.5	75370.2	77475.6	80900.4	69411.9	62038.9
P05198	EIF2S1	Eukaryotic translation initiation factor 2 subunit 1	14	321138	325290	355281	363127	419506	346510	337904	369904	345738	393284	338621	311041	373913	315466	365288	386030	326268	282268
P20042	EIF2S2	Eukaryotic translation initiation factor 2 subunit 2	9	386148	469004	360500	474738	367965	340296	452051	393789	362201	398594	455710	463550	391802	421458	388694	381889	502799	459184
P41091	EIF2S3	Eukaryotic translation initiation factor 2 subunit 3	11	521150	588624	782179	576068	819029	783960	555595	733614	616715	761748	574696	508409	560472	500890	618460	750718	549315	502274
Q14152	EIF3A	Eukaryotic translation initiation factor 3 subunit A	18	221694	265511	263706	244864	281655	273788	226477	257392	250515	247645	263559	252980	226128	255072	255169	217280	233964	276325
P55884-2	EIF3B	Isoform 2 of Eukaryotic translation initiation factor 3 subunit B	15	620416	664241	704491	729243	851226	785660	672871	910937	793821	876620	623762	633087	619145	587436	703896	777447	634333	614593
Q99613	EIF3C	Eukaryotic translation initiation factor 3 subunit C	11	574196	617812	318359	509153	402547	382935	552776	372873	502801	398268	700107	549634	612439	557524	470565	408258	530429	656395
O15371	EIF3D	Eukaryotic translation initiation factor 3 subunit D	9	326800	424240	478146	417014	513665	498311	427645	520976	419732	520425	400489	360029	426357	411896	412532	525831	458162	415537
P60228	EIF3E	Eukaryotic translation initiation factor 3 subunit E	12	912521	916695	541048	937448	571618	556752	932675	482370	809593	553248	867493	980072	788082	810994	729991	415632	939076	821256
O00303	EIF3F	Eukaryotic translation initiation factor 3 subunit F	5	412088	396194	458709	396306	434788	439090	526425	387032	364203	422824	407829	436199	403757	426070	431640	451149	373513	439581
O75821	EIF3G	Eukaryotic translation initiation factor 3 subunit G	6	146381	185410	145663	184565	160720	156704	168321	179578	169715	177184	179228	196912	155433	187744	173571	159079	197946	202876
O15372	EIF3H	Eukaryotic translation initiation factor 3 subunit H	7	204321	242430	213761	238043	233593	222070	227175	249350	247558	229982	228589	232455	216127	206597	252629	221856	229247	270940
Q13347	EIF3I	Eukaryotic translation initiation factor 3 subunit I	7	147927	186234	187316	207708	202814	186700	179563	175557	190950	198330	204212	208948	204994	210096	187316	171447	196256	194236
O75822	EIF3J	Eukaryotic translation initiation factor 3 subunit J	7	552195	720549	1.00558e+06	732385	1.05195e+06	927404	621859	940200	831985	980866	657429	629786	610374	613872	783960	1.05413e+06	691007	725383
Q9UBQ5	EIF3K	Eukaryotic translation initiation factor 3 subunit K	6	179045	220287	225828	209267	198596	209399	211989	199020	220287	219009	211989	185279	185146	188542	205877	220287	203196	200936
Q9Y262	EIF3L	Eukaryotic translation initiation factor 3 subunit L	19	340120	346236	472768	345698	470565	460790	353251	480646	380932	488785	315676	369684	318939	325917	376115	418953	351392	334820
Q7L2H7	EIF3M	Eukaryotic translation initiation factor 3 subunit M	3	111116	131429	278693	184345	300875	286471	148538	244044	199581	240381	146551	113473	163031	119086	257661	258036	138578	142912
P60842	EIF4A1	Eukaryotic initiation factor 4A-I	19	1.16493e+06	1.32729e+06	1.1864e+06	1.30948e+06	1.2972e+06	1.29433e+06	1.25864e+06	1.08099e+06	1.33626e+06	1.2345e+06	1.33989e+06	1.29504e+06	1.25608e+06	1.2229e+06	1.11535e+06	1.07086e+06	1.36694e+06	1.34299e+06
Q14240-2	EIF4A2	Isoform 2 of Eukaryotic initiation factor 4A-II	18	383338	520725	420668	496988	472569	434405	478033	543425	468986	472768	446825	437479	427706	422031	561228	594754	454042	456281
P23588	EIF4B	Eukaryotic translation initiation factor 4B	8	567940	740840	1.00661e+06	882645	1.21702e+06	1.01294e+06	675366	567085	1.0183e+06	1.15898e+06	666280	733277	606401	692054	753063	657376	623530	829530
P06730-2	EIF4E	Isoform 2 of Eukaryotic translation initiation factor 4E	7	1.42498e+06	1.58746e+06	599134	1.27043e+06	691049	681286	1.5059e+06	866573	1.06281e+06	975381	1.58746e+06	1.46886e+06	1.52577e+06	1.52415e+06	1.03898e+06	874323	1.54208e+06	1.73807e+06
Q9NRA8-3	EIF4ENIF1	Isoform 3 of Eukaryotic translation initiation factor 4E transporter	2	82143.8	91544.9	61911.4	82284.8	71319.2	58598.4	90875.6	64714.4	85669.9	76941.1	97105.4	94237.9	81025.5	106544	77404.7	73388.8	88555.9	92620.6
P78344	EIF4G2	Eukaryotic translation initiation factor 4 gamma 2	24	611826	730757	859135	692498	980866	831985	679012	848992	729991	798405	688889	739552	632743	691379	743091	891515	685720	749485
O43432-3	EIF4G3	Isoform 3 of Eukaryotic translation initiation factor 4 gamma 3	25	223909	316949	308802	305832	361821	310550	335565	339670	294729	317112	322912	339480	272306	275315	299455	308971	299467	350891
Q15056	EIF4H	Eukaryotic translation initiation factor 4H	4	282212	306850	82234.9	190950	78675	74481.7	240668	89052.4	222152	86452	284306	312015	262559	282623	224027	98147.4	258587	313841
P55010	EIF5	Eukaryotic translation initiation factor 5	6	466089	748237	937448	610966	1.05413e+06	879498	607276	1.05413e+06	601296	1.02189e+06	485867	725945	500344	670578	651226	798405	642846	714372
P63241-2	EIF5A	Isoform 2 of Eukaryotic translation initiation factor 5A-1	10	1.21909e+06	1.41323e+06	1.32456e+06	1.24924e+06	1.16572e+06	1.5362e+06	1.16022e+06	1.0935e+06	1.28405e+06	1.24924e+06	1.2572e+06	1.39308e+06	1.07945e+06	1.19375e+06	1.23931e+06	1.32456e+06	1.14231e+06	1.4061e+06
O60841	EIF5B	Eukaryotic translation initiation factor 5B	16	355746	285328	297345	329747	290233	305142	234363	237166	317919	271679	240265	255005	260212	223056	303799	308405	300576	330031
Q53HC9	EIPR1	EARP and GARP complex-interacting protein 1	5	918322	1.30903e+06	274942	932080	278497	268162	1.20194e+06	302138	717732	277285	937702	1.06625e+06	863817	1.04161e+06	623691	291257	1.11048e+06	1.25078e+06
P08246	ELANE	Neutrophil elastase	4	376688	498237	487776	538287	466336	920203	393859	585812	501366	647763	460746	518234	390311	394739	685419	848174	405592	438312
Q15717-2	ELAVL1	Isoform 2 of ELAV-like protein 1	4	240371	203251	189025	172864	218249	218027	178864	217007	179028	218358	188429	172589	217047	171145	161481	210913	190327	192441
Q92556	ELMO1	Engulfment and cell motility protein 1	14	487261	600677	554699	478146	512797	537758	544182	570793	464069	515818	586877	567684	583575	512324	505322	489617	577757	440524
Q96JJ3	ELMO2	Engulfment and cell motility protein 2	2	306452	197620	295323	249527	383212	306909	264897	291257	291778	257757	236602	220674	234218	239328	227659	182795	212843	212843
Q15370-2	ELOB	Isoform 2 of Elongin-B	4	670404	774195	677794	746741	692498	676377	815227	694544	782179	695098	771748	840160	697246	711217	816828	801766	861586	937538
Q15369	ELOC	Elongin-C	5	542620	725508	376452	508006	368206	361488	637163	336982	494325	348330	649547	585135	602924	572366	546010	443178	623209	762818
P50402	EMD	Emerin	10	393846	233181	303019	290233	313403	258620	264217	345183	298331	348649	227229	238872	260422	266777	253483	304721	226241	257197
Q9Y6C2	EMILIN1	EMILIN-1	23	585254	432041	502136	528323	610660	647763	521870	636110	556366	711914	445469	472074	514173	476245	489617	509482	475187	473344
O95834-3	EML2	Isoform 3 of Echinoderm microtubule-associated protein-like 2	12	550996	693506	631936	583710	633821	605895	634707	651584	582913	622779	595794	678752	549229	587055	567085	711914	626810	687645
Q32P44	EML3	Echinoderm microtubule-associated protein-like 3	14	399926	416601	553248	444373	561681	513204	384230	512412	459281	500115	406453	408819	420504	395501	418720	541412	398912	364314
Q9HC35	EML4	Echinoderm microtubule-associated protein-like 4	17	331269	346959	382814	367719	383561	384149	345517	403842	383212	381374	340178	313544	341804	372944	367719	425026	339669	349652
O94919	ENDOD1	Endonuclease domain-containing 1 protein	15	495014	361980	776273	509482	758535	682344	479489	647763	555955	637518	378979	473120	500398	519076	552038	638324	435514	516846
P06733	ENO1	Alpha-enolase	21	2.87687e+06	3.47947e+06	5.67522e+06	3.72083e+06	5.04201e+06	4.82902e+06	3.51488e+06	5.47217e+06	4.11849e+06	4.82902e+06	3.33633e+06	3.97413e+06	2.62816e+06	3.23843e+06	3.88795e+06	6.74418e+06	3.51488e+06	4.09453e+06
P09104	ENO2	Gamma-enolase	14	393711	557062	458187	484337	535582	465986	505029	566695	525090	428358	521866	467834	506788	478652	423750	599787	534683	462660
P13929	ENO3	Beta-enolase	6	218938	478781	236937	207099	163680	202637	529722	288691	233847	238394	251963	368845	274966	340286	313255	292392	528052	357949
Q9UHY7	ENOPH1	Enolase-phosphatase E1	4	248502	402633	429749	366394	411443	418276	393212	411443	424472	382318	400008	407829	398760	363517	394960	444373	391178	404655
Q9Y6X5	ENPP4	Bis(5'-adenosyl)-triphosphatase ENPP4	5	196441	129887	271110	167378	269656	243564	149370	273292	204883	322268	149370	196441	176105	182478	189884	416676	178987	203965
O43768-4	ENSA	Isoform 4 of Alpha-endosulfine	6	253076	177479	174342	249027	192609	181654	150673	157892	247866	197831	190845	180843	199195	132066	212750	178231	189271	183299
Q5NDL2	EOGT	EGF domain-specific O-linked N-acetylglucosamine transferase	4	157421	235861	364921	211916	333633	311656	212347	296923	265133	308405	212347	236369	200605	207523	296584	362053	220984	298068
P11171	EPB41	Protein 4.1	8	228629	227412	201815	180465	199755	189566	184899	210457	164973	211582	213701	191444	213088	217919	191009	202431	177003	237694
Q9Y2J2	EPB41L3	Band 4.1-like protein 3	6	201721	226538	284741	266821	443178	375568	210759	393987	263706	353566	241258	226538	254555	226753	236573	392553	227509	280739
P07099	EPHX1	Epoxide hydrolase 1	3	338759	158551	438344	243564	462139	451149	234041	433104	321103	400920	169018	208925	244529	178096	316288	394627	175678	176431
P34913	EPHX2	Bifunctional epoxide hydrolase 2	12	308002	360001	229547	339562	264162	245959	456897	311885	369838	267302	392430	350999	405236	242291	387866	247764	418590	451770
Q7L775	EPM2AIP1	EPM2A-interacting protein 1	1	164819	231568	180759	186654	214335	166136	190400	151480	189025	214653	161915	174727	167063	193090	187987	181488	192106	190198
Q9Y6I3-1	EPN1	Isoform 2 of Epsin-1	5	284704	312695	255169	252882	247917	227659	304288	197486	228016	223503	298833	274942	229806	255419	307240	240528	300968	363828
P07814	EPRS	Bifunctional glutamate/proline--tRNA ligase	15	178892	217379	229712	210913	242534	225828	210131	177806	192311	211167	192149	217515	192721	191222	199581	186654	193569	229743
P42566	EPS15	Epidermal growth factor receptor substrate 15	29	704645	811397	921194	787217	1.0099e+06	881291	721871	921194	865589	944489	759680	903523	696504	889511	820488	1.00403e+06	803211	874789
Q9UBC2-2	EPS15L1	Isoform 2 of Epidermal growth factor receptor substrate 15-like 1	24	831800	978551	969962	999088	1.08099e+06	983710	969771	1.1834e+06	1.03827e+06	988482	967504	944672	938841	920753	988482	1.12141e+06	980214	1.00448e+06
Q9NZ08-2	ERAP1	Isoform 2 of Endoplasmic reticulum aminopeptidase 1	30	897186	841990	1.32306e+06	847284	1.31532e+06	1.30838e+06	847840	807856	1.13079e+06	1.05413e+06	868500	889161	1.01842e+06	947058	1.10092e+06	1.12312e+06	850916	972188
Q96RT1-8	ERBIN	Isoform 8 of Erbin	14	558385	326249	386059	370051	351233	403842	363663	432042	345698	371565	303967	320960	371451	354069	321357	416015	319431	388225
Q8IUD2	ERC1	ELKS/Rab6-interacting/CAST family member 1	13	220851	330455	309647	273035	315915	298895	268718	304395	271247	309809	259564	288725	258999	271929	274942	379192	307823	327407
Q969X5	ERGIC1	Endoplasmic reticulum-Golgi intermediate compartment protein 1	5	844631	1.03604e+06	559070	594754	509482	565743	930635	578825	724198	706667	873242	941787	781493	920224	944489	538689	933855	1.19604e+06
O75477	ERLIN1	Erlin-1	4	220771	122383	267933	176235	210397	132683	176623	204331	211416	199020	164849	211650	231791	200690	181350	190668	193805	161595
O75460	ERN1	Serine/threonine-protein kinase/endoribonuclease IRE1	3	140866	107466	99366	134883	98846.2	85782.1	163017	78213	103760	87530.7	196918	125745	168486	218786	223849	106446	171402	518602
Q96HE7	ERO1A	ERO1-like protein alpha	3	106707	133826	134215	112246	150421	140654	116742	138417	113558	130768	107448	126830	92550.7	108330	128118	178432	115073	107820
Q86YB8	ERO1B	ERO1-like protein beta	4	105546	102478	165484	94471.9	159145	151900	110982	164476	128027	161534	105921	115087	103134	109978	131603	169263	102594	102862
P30040	ERP29	Endoplasmic reticulum resident protein 29	11	457897	576822	729243	586319	798405	705024	547855	703896	658849	715073	505939	532885	490335	536152	608333	896041	575900	739630
Q9BS26	ERP44	Endoplasmic reticulum resident protein 44	11	330507	396822	537758	472768	554290	550892	423833	556752	371747	598256	395145	387767	399324	407025	321808	645021	418236	428236
Q96AP7	ESAM	Endothelial cell-selective adhesion molecule	10	490758	509685	398268	535582	452290	444755	486384	502504	471057	512412	478631	458615	448431	471927	432042	550892	521510	532028
P10768	ESD	S-formylglutathione hydrolase	12	351911	420072	481279	400260	515078	510562	348898	412134	426054	523189	359107	414420	345329	375191	414104	525559	346984	431406
P62495	ETF1	Eukaryotic peptide chain release factor subunit 1	13	358631	466769	422372	419472	442512	406032	404838	444022	409829	435677	430663	385288	402054	382695	418953	450359	395202	380516
P13804	ETFA	Electron transfer flavoprotein subunit alpha, mitochondrial	13	643996	246058	692498	433104	764944	695729	365291	724198	616049	654176	333476	437232	437813	499730	505939	853341	267930	437232
P38117	ETFB	Electron transfer flavoprotein subunit beta	17	1.01932e+06	301392	1.09055e+06	612744	1.22681e+06	1.13847e+06	556794	1.05195e+06	837521	1.00284e+06	453904	686690	650270	753314	768661	1.42231e+06	374374	652739
O95571	ETHE1	Persulfide dioxygenase ETHE1, mitochondrial	6	619808	197298	441771	334458	439927	431391	278581	471828	386671	431640	251947	464272	392755	404958	394627	504075	195899	374525
Q9UI08-2	EVL	Isoform 1 of Ena/VASP-like protein	3	42451.6	41418.8	30870.8	37343.5	42360.7	39812.1	39790.5	46332.2	45125.1	43604.1	42523.7	43602.4	44466.7	44609.2	37818.9	27552.1	41015	40243.5
Q9NV70	EXOC1	Exocyst complex component 1	17	669213	722626	466801	561228	527114	508006	664046	533576	550892	507155	675017	751443	662597	797230	576959	431090	750162	600868
Q96KP1	EXOC2	Exocyst complex component 2	15	272396	287382	311412	321808	349942	320837	291461	288971	303019	291778	260524	259253	269639	262373	318774	267534	307634	236293
O60645	EXOC3	Exocyst complex component 3	14	480959	550898	448442	584221	540354	460151	572528	409829	447160	502504	506631	543330	504335	523651	428358	359128	630654	495132
Q17RC7	EXOC3L4	Exocyst complex component 3-like protein 4	9	268240	194200	273788	231134	262803	268646	246789	264162	214932	268646	40135.7	168907	116685	179989	211582	235666	148534	209218
Q96A65	EXOC4	Exocyst complex component 4	17	194897	175145	227931	188675	241798	209862	174801	170417	200700	208041	201052	183634	189175	153766	189484	144119	227060	158691
O00471	EXOC5	Exocyst complex component 5	12	462651	499163	515818	568541	630655	535162	545610	484337	490380	551419	501132	528792	529564	501132	508006	413621	581383	413001
Q8TAG9	EXOC6	Exocyst complex component 6	2	46082.2	75215.2	25351.8	56553.9	28004.5	27891.6	49130.2	21276.2	43015.7	32096.4	69898.8	80657.8	63436.2	60980.7	52934.6	23042.5	69898.8	52740.3
Q9Y2D4	EXOC6B	Exocyst complex component 6B	4	366793	220872	358391	441644	400920	390103	366793	229149	393789	309920	568601	553693	520242	651311	423496	269245	528620	454515
Q9UPT5	EXOC7	Exocyst complex component 7	11	138785	132004	136684	139913	151480	144119	132561	116552	132882	132683	135184	142293	117004	139720	140356	110895	152263	117716
Q8IYI6	EXOC8	Exocyst complex component 8	12	392064	380115	471217	447972	456152	419732	417447	386354	389855	441644	384202	401565	382570	421461	411699	362201	420134	383854
P15311	EZR	Ezrin	21	271873	269481	239081	213594	225335	283417	208111	338425	231474	213976	223759	333259	233664	273997	245541	273788	230627	224589
Q9UBV8	F1	Peflin	3	306977	361367	679745	324273	598580	641820	379629	532390	384149	573653	323013	351856	320574	313212	443697	712747	290701	332879
P00742	F10	Coagulation factor X	5	574902	567957	102066	490700	98267.8	106446	602778	103346	419472	95335.5	594777	494678	678635	553981	354107	120203	604443	565441
P03951	F11	Coagulation factor XI	1	667482	434663	175445	523742	190668	214653	515967	189387	442512	169984	424126	428332	679083	438487	449381	226470	524411	506343
Q9Y624	F11R	Junctional adhesion molecule A	11	1.04241e+06	510233	762504	627283	598256	801766	505752	770868	570320	766307	444348	454548	470530	485482	532390	708914	512829	583678
P00748	F12	Coagulation factor XII	7	335391	330945	94051.1	368631	93210.6	95443.4	309869	96386.3	285508	96167.6	327000	326286	442237	377366	162336	102227	438016	265860
P00488	F13A1	Coagulation factor XIII A chain	29	4.44148e+06	5.46736e+06	8.16125e+06	5.67522e+06	9.60708e+06	6.35198e+06	4.98767e+06	1.11022e+07	6.74418e+06	8.46451e+06	5.19118e+06	4.98767e+06	4.24608e+06	5.3532e+06	6.20357e+06	8.8752e+06	4.98767e+06	5.46736e+06
P05160	F13B	Coagulation factor XIII B chain	12	935771	891449	261635	1.00403e+06	231134	248794	943824	234692	632402	227343	1.02449e+06	870760	1.00383e+06	883028	807856	224027	1.0188e+06	1.08816e+06
P00734	F2	Prothrombin	28	2.45726e+06	1.80965e+06	1.03105e+06	1.71375e+06	865589	894102	1.7579e+06	1.03409e+06	1.84316e+06	956721	2.13741e+06	1.84028e+06	2.59228e+06	2.12395e+06	1.70248e+06	1.19384e+06	1.88367e+06	1.93009e+06
Q96RI0	F2RL3	Proteinase-activated receptor 4	3	773513	459388	608333	589083	1.08658e+06	886512	484629	1.16572e+06	802971	1.05962e+06	578903	533013	534480	517702	552949	1.59557e+06	444131	543543
P12259	F5	Coagulation factor V	63	2.25699e+06	2.06126e+06	2.82803e+06	2.39191e+06	2.87166e+06	3.0423e+06	2.5859e+06	2.61319e+06	2.53368e+06	2.91821e+06	2.29519e+06	2.00291e+06	2.22569e+06	2.68762e+06	2.39191e+06	3.10561e+06	2.39599e+06	2.25699e+06
P23610	F8A1	Factor VIII intron 22 protein	3	270028	206331	106909	224828	112471	90544.8	185504	98509	276649	92885.7	221586	240842	208415	128609	203066	95340.6	222231	171570
P00740	F9	Coagulation factor IX	5	559942	786138	388694	604309	372873	445080	950776	499053	500883	484779	472230	512271	816266	829349	595310	372599	665962	392868
Q01469	FABP5	Fatty acid-binding protein 5	6	138223	157781	118894	133865	138138	122073	123381	111222	133260	128655	149695	148024	118696	121800	139913	143282	135077	170358
Q9UNN5	FAF1	FAS-associated factor 1	8	268142	325604	212718	261891	212207	216094	311951	227815	241535	214784	312388	276214	269853	289205	251384	254921	326959	335171
Q9NRY5	FAM114A2	Protein FAM114A2	12	141216	175715	158239	176140	166847	150186	144176	152919	157884	147741	159545	163380	149527	152986	145106	163152	153205	179233
Q9NZB2-6	FAM120A	Isoform F of Constitutive coactivator of PPAR-gamma-like protein 1	6	150217	151934	120259	134297	134297	111760	145285	125140	131286	134724	133657	146665	156383	165722	131653	94730.3	149559	136728
Q9BYI3	FAM126A	Hyccin	1	23077.1	22682.6	36026.6	31353.6	31353.6	33981.6	24353.4	31031.2	40666.1	24029.4	17900.2	21869	15106.4	20193.9	27891.6	20846.5	23626.4	19221.3
Q9BZQ8	FAM129A	Protein Niban	14	357811	381695	349448	433899	444705	365185	366869	429551	324506	307363	407133	384241	330325	324063	362938	355961	441980	338118
Q96C01	FAM136A	Protein FAM136A	4	205724	218187	261021	256191	298123	294796	258819	240381	224103	289124	219043	249073	194539	210495	241159	309809	226782	261999
Q5W0V3	FAM160B1	Protein FAM160B1	15	866757	852265	658257	815319	718953	667553	835250	669917	787217	653252	763747	820937	840527	715484	779555	645994	858358	795713
Q8N128-2	FAM177A1	Isoform 2 of Protein FAM177A1	4	119951	121319	196372	159249	166466	173772	115352	173094	144382	186700	105087	112443	117713	116294	115557	199190	113330	143674
Q92520	FAM3C	Protein FAM3C	2	181358	230022	88798.5	130279	112679	101029	162305	115652	130154	151274	160434	189984	179477	163874	148130	127625	200190	241950
Q9NUQ9	FAM49B	Protein FAM49B	14	255789	273303	274519	235469	250627	274942	259240	225726	238043	233048	277375	287124	270973	295277	250627	276597	263000	276093
Q658Y4	FAM91A1	Protein FAM91A1	6	334247	417064	263484	284318	277682	266610	367835	249793	282476	250850	350652	353534	337036	330225	264935	267302	424151	333582
Q9Y285	FARSA	Phenylalanine--tRNA ligase alpha subunit	7	189780	204154	240245	189025	235666	234106	227612	226553	217417	230822	205341	231415	198446	214785	234597	221324	194702	187684
Q9NSD9	FARSB	Phenylalanine--tRNA ligase beta subunit	12	417616	387067	519996	417796	517119	541048	385682	552949	441081	504525	384109	390790	413061	364406	460151	501366	420810	354645
P49327	FASN	Fatty acid synthase	59	1.03451e+06	1.20574e+06	1.51481e+06	1.25509e+06	1.48673e+06	1.43675e+06	1.18456e+06	1.6154e+06	1.21702e+06	1.47891e+06	1.10593e+06	1.15639e+06	1.0686e+06	1.16732e+06	1.31243e+06	1.16572e+06	1.16154e+06	1.05467e+06
P23142	FBLN1	Fibulin-1	7	284653	306703	138900	236439	126749	148887	314911	130456	188498	129003	260368	281480	292650	265407	235638	160735	379408	248747
Q9UBX5	FBLN5	Fibulin-5	4	61347.7	92600	35727.1	63035	38477.1	38477.1	55931.6	57357.3	53532.4	45747.9	60144.7	59618.4	65368.6	58193.3	47943.8	55399.5	97953.6	47657.5
P09467	FBP1	Fructose-1,6-bisphosphatase 1	2	63155	41614.7	38353	32641.3	51416.7	43643.4	46908.1	114728	36700.6	40478.7	33264.9	79891.7	50439.7	50439.7	43718.4	57303.5	43064.5	41081.6
Q9Y3I1	FBXO7	F-box only protein 7	3	1.35032e+06	1.35287e+06	1.96864e+06	1.36246e+06	2.05672e+06	1.96864e+06	1.48756e+06	1.22681e+06	1.55436e+06	1.96864e+06	1.29148e+06	1.33732e+06	1.32459e+06	1.69684e+06	1.45909e+06	1.52465e+06	1.40208e+06	1.24142e+06
P30273	FCER1G	High affinity immunoglobulin epsilon receptor subunit gamma	4	2.22743e+06	1.55509e+06	618460	1.48238e+06	429406	532972	1.76759e+06	450359	693410	377850	1.44498e+06	1.51192e+06	1.63141e+06	1.66357e+06	1.69718e+06	478610	1.84239e+06	2.1075e+06
P08637	FCGR3A	Low affinity immunoglobulin gamma Fc region receptor III-A	1	154471	222423	175694	194256	124773	180390	161289	133012	255345	146346	225624	125662	315650	205103	174994	166847	187889	193883
Q15485	FCN2	Ficolin-2	2	181248	192334	51043	140844	42347.5	46048	200471	42209.6	106686	39136	176028	112684	217377	149023	117486	51373.7	192552	151688
O75636	FCN3	Ficolin-3	4	1.92023e+06	1.88947e+06	303537	1.56045e+06	284226	328569	1.87e+06	260712	1.39197e+06	279711	2.26404e+06	1.38247e+06	2.37235e+06	1.55599e+06	1.12141e+06	295981	1.73548e+06	1.43919e+06
P14324	FDPS	Farnesyl pyrophosphate synthase	7	255891	282731	211916	309920	204883	212414	281818	201216	284841	240528	335039	290194	285221	268045	271247	189091	292441	262680
P16591	FER	Tyrosine-protein kinase Fer	8	192658	243855	323341	218514	311990	315121	222506	349942	238531	317101	208087	223505	210959	221114	241327	325106	215543	204523
Q96AC1-3	FERMT2	Isoform 3 of Fermitin family homolog 2	4	387776	296432	250515	269008	248909	199439	256223	207884	194131	217417	206997	355287	239246	270658	329747	280441	344829	300860
Q86UX7	FERMT3	Fermitin family homolog 3	38	3.37888e+06	3.37888e+06	7.36376e+06	4.42591e+06	8.16125e+06	7.17461e+06	3.07527e+06	7.17461e+06	5.47217e+06	7.17461e+06	3.30259e+06	3.0001e+06	3.37888e+06	3.37888e+06	4.89953e+06	6.20357e+06	3.7531e+06	3.07527e+06
P07332	FES	Tyrosine-protein kinase Fes/Fps	15	217685	251833	248794	240528	279050	224027	216209	212913	239683	257661	231011	248283	241765	255286	235056	217688	212535	216209
Q9UGM5	FETUB	Fetuin-B	2	677522	723223	276130	728344	288971	301927	741694	415632	620947	496988	881676	622542	941641	832501	732385	358106	775170	652671
P02671	FGA	Fibrinogen alpha chain	32	6.165e+06	6.165e+06	4.50457e+06	6.20357e+06	4.28968e+06	3.96204e+06	6.165e+06	5.60137e+06	5.60137e+06	5.67522e+06	6.74418e+06	6.43334e+06	7.35592e+06	6.165e+06	5.98641e+06	5.04201e+06	7.77407e+06	6.74418e+06
P02675	FGB	Fibrinogen beta chain	32	5.31345e+06	5.31345e+06	4.74186e+06	6.50801e+06	4.82902e+06	4.50457e+06	5.65787e+06	6.06176e+06	6.06176e+06	6.74418e+06	6.74798e+06	5.94481e+06	6.5033e+06	5.31345e+06	6.35198e+06	5.31154e+06	6.74798e+06	5.94481e+06
Q5JSP0	FGD3	FYVE, RhoGEF and PH domain-containing protein 3	13	198741	242283	246799	216631	259940	242648	218552	256796	207575	255693	209124	194836	216615	203997	193938	260309	232131	211815
Q96M96	FGD4	FYVE, RhoGEF and PH domain-containing protein 4	13	580691	600288	294120	500445	308692	302553	604330	279711	423496	276518	651030	525393	774224	656771	435898	318184	591957	527235
Q9NVK5	FGFR1OP2	FGFR1 oncogene partner 2	4	71435.2	51917.9	132439	84837	111117	121300	68413.5	95221.9	107274	113343	64514.5	61045.3	62643.6	67782.9	90383.9	99791.5	74403.8	68960.4
P02679	FGG	Fibrinogen gamma chain	29	7.58659e+06	6.85328e+06	6.08037e+06	9.75786e+06	7.75584e+06	7.47934e+06	7.58659e+06	7.47934e+06	9.01449e+06	9.01449e+06	8.59736e+06	7.58659e+06	9.07497e+06	7.58659e+06	9.01449e+06	8.28934e+06	1.0734e+07	9.46731e+06
Q08830	FGL1	Fibrinogen-like protein 1	1	201702	284155	128118	307065	115436	135565	193479	125757	113013	115436	173724	196125	266420	174666	184901	160262	313477	163056
P07954	FH	Fumarate hydratase, mitochondrial	12	385817	255977	265294	320969	261794	275290	331997	247764	325511	270064	347159	344299	331433	404274	300875	341508	284797	297387
Q13642-4	FHL1	Isoform 4 of Four and a half LIM domains protein 1	15	964551	1.08055e+06	1.25509e+06	995460	1.28737e+06	1.05962e+06	891109	1.36622e+06	1.01687e+06	1.10469e+06	907913	992475	906536	849874	933851	1.17137e+06	922786	1.19927e+06
Q14192	FHL2	Four and a half LIM domains protein 2	5	179514	201499	206770	207323	226960	232168	192345	174269	212718	231634	153558	155635	160881	145973	194901	175063	239261	208449
Q9Y613	FHOD1	FH1/FH2 domain-containing protein 1	40	901686	931868	1.06429e+06	952331	1.02709e+06	977819	977488	1.0183e+06	975381	724198	864827	977488	869864	901686	956721	855990	983259	889788
O43427	FIBP	Acidic fibroblast growth factor intracellular-binding protein	5	565630	529934	615105	581586	624216	629070	534454	716079	623071	643363	520757	539291	602212	488984	558369	528764	615429	652862
Q9Y3D6	FIS1	Mitochondrial fission 1 protein	3	274583	277997	327759	225612	276130	304558	270568	270064	267534	277453	243687	253115	271676	212199	240381	271247	245193	258055
Q5T1M5	FKBP15	FK506-binding protein 15	17	328889	348294	336100	334905	319731	322066	346872	346959	322963	318611	328633	339287	330458	349058	307824	322824	335144	327880
P62942	FKBP1A	Peptidyl-prolyl cis-trans isomerase FKBP1A	2	139189	159293	140521	185920	128214	129998	149332	129951	154326	117282	170419	135834	147461	151102	182150	185465	136874	155428
P68106	FKBP1B	Peptidyl-prolyl cis-trans isomerase FKBP1B	1	67327.7	103537	75031.6	71764.5	70866.7	76051.4	70712.2	65035.2	78213	86970	73715	80557.9	84982.5	66217.4	74727.3	100255	100382	78230.2
P26885	FKBP2	Peptidyl-prolyl cis-trans isomerase FKBP2	3	426722	605150	788391	598256	619713	788391	489862	687694	643908	691718	502010	510753	449077	446448	523189	864043	550991	696674
Q00688	FKBP3	Peptidyl-prolyl cis-trans isomerase FKBP3	8	772292	1.31653e+06	1.52836e+06	1.41249e+06	1.5622e+06	1.58214e+06	73651.5	1.52836e+06	1.48346e+06	1.38027e+06	1.07521e+06	2.04912e+06	894008	1.36001e+06	1.29092e+06	1.66409e+06	1.27042e+06	1.10415e+06
Q02790	FKBP4	Peptidyl-prolyl cis-trans isomerase FKBP4	10	212525	375650	374814	323098	391198	394960	348372	404094	356156	368631	314630	281870	286812	267002	338425	394960	318571	344358
Q13451	FKBP5	Peptidyl-prolyl cis-trans isomerase FKBP5	13	524500	648008	528323	546389	579284	461362	575875	632901	519275	580691	672823	547321	639611	674265	518837	685419	523919	535231
Q13045	FLII	Protein flightless-1 homolog	33	543557	586459	782903	638324	831017	779555	619031	616361	641820	816828	498452	636526	521049	578674	612744	616715	592883	551530
O75369-8	FLNB	Isoform 8 of Filamin-B	14	81411.9	85998.3	99433.8	91994.3	101683	115836	79908.6	77404.7	89110.2	108562	73700.5	66080.9	78467.9	76390	93210.6	73215.6	78217.2	78296.1
O75955	FLOT1	Flotillin-1	7	427034	288419	288691	279840	160861	165764	352546	197192	240879	163844	296642	271678	419648	413434	290451	205398	291376	333394
O95466-3	FMNL1	Isoform 3 of Formin-like protein 1	2	126916	139472	135240	127028	130868	167901	140573	173430	136028	118783	121552	139034	165568	162109	168934	156354	133436	77342.9
Q06787	FMR1	Synaptic functional regulator FMR1	5	66015.9	70360.2	88345.5	79564.5	89626.8	78982.1	72632	77643.3	73955.6	85092.2	69090.8	63076	67963.7	61769.2	79326.7	95443.4	66073.6	64376.8
P02751	FN1	Fibronectin	71	4.82431e+06	8.28556e+06	2.04467e+06	4.34465e+06	2.19611e+06	2.39191e+06	4.09245e+06	2.84839e+06	3.72083e+06	2.45176e+06	3.82657e+06	3.28178e+06	5.11809e+06	3.82657e+06	4.11849e+06	3.22028e+06	1.03875e+07	4.00266e+06
Q9H479	FN3K	Fructosamine-3-kinase	8	305982	389633	565743	307824	454547	258776	336884	462877	242648	264517	319413	244127	240781	384633	269837	234692	404718	280451
Q9HA64	FN3KRP	Ketosamine-3-kinase	2	110828	143018	150421	102513	126369	128431	117987	122303	101683	108796	123488	102761	93256.4	119706	101622	127264	117734	119918
P49354	FNTA	Protein farnesyltransferase/geranylgeranyltransferase type-1 subunit alpha	6	329290	441558	721486	462139	667553	674602	405980	466801	536274	584221	406222	435934	365749	367375	500115	599134	418227	429502
P49356	FNTB	Protein farnesyltransferase subunit beta	2	103567	94337.5	104107	98078.3	114310	117975	76653.2	126317	91889.5	117209	98101.1	90116.5	98101.1	82635.7	96859.3	113243	120825	84990.1
Q9Y2L6	FRMD4B	FERM domain-containing protein 4B	7	313867	385411	263231	393789	267534	250282	334106	303108	320837	289644	331181	352072	324750	325382	310892	236009	374272	430721
Q9BZ67	FRMD8	FERM domain-containing protein 8	2	79409.5	119457	139740	133581	164363	130608	142163	144599	119859	154466	154791	110260	114994	90675.1	146876	140654	110456	116988
Q12841	FSTL1	Follistatin-related protein 1	5	142235	149508	84267.6	141712	155466	94673.3	208505	132256	143373	228549	192635	190006	149291	172897	90205.6	141258	169706	172558
P02794	FTH1	Ferritin heavy chain	5	353841	421159	181075	299871	203139	203604	391600	188901	266305	189987	471741	297043	354328	315750	263231	203604	425958	487214
P02792	FTL	Ferritin light chain	2	313857	397417	307824	325761	399014	441771	405643	483497	375568	341860	360063	375048	354592	335987	305647	461362	373558	399596
Q96AE4-2	FUBP1	Isoform 2 of Far upstream element-binding protein 1	4	129089	135573	120203	110313	123249	159249	104921	147270	133985	118894	119536	141584	119878	147731	126176	151085	107492	121462
Q96I24	FUBP3	Far upstream element-binding protein 3	2	30974.7	25165.7	19009.7	24464.3	19376.9	18369.4	30818.7	24464.3	25906.2	21722.2	31030.9	27760.5	28754.5	32260.4	21319.6	20474.9	30224.7	28874.7
P04066	FUCA1	Tissue alpha-L-fucosidase	1	312082	333883	243430	283711	260309	256389	268952	242777	274358	342760	351864	273268	324182	327627	212718	390103	348245	300290
P35637	FUS	RNA-binding protein FUS	2	196779	219943	331559	245081	330273	349132	229481	236009	294588	298710	176085	207738	211238	239582	301558	329906	200317	183660
Q9BYC5	FUT8	Alpha-(1,6)-fucosyltransferase	7	376244	697491	155131	406316	173039	319113	428272	332773	278497	305142	421749	644260	512236	408571	208486	192233	393871	368944
Q16595	FXN	Frataxin, mitochondrial	2	405184	307353	304395	272170	321103	309468	364423	240245	285213	299026	421483	299524	319358	357143	255497	288243	277606	457072
P51114	FXR1	Fragile X mental retardation syndrome-related protein 1	5	389445	467651	435118	427855	497367	464777	437448	428649	438722	484337	458315	427973	480149	453475	370557	385566	446079	432242
O15117-3	FYB1	Isoform 3 of FYN-binding protein 1	23	752501	816294	904334	707187	1.0935e+06	836675	755023	761748	706667	878299	837733	816294	759324	762651	781306	997318	887283	911462
Q9BQS8-4	FYCO1	Isoform 4 of FYVE and coiled-coil domain-containing protein 1	18	552039	356704	275858	363043	329747	292880	342222	319474	353867	302867	383846	388224	394885	396449	338984	306300	387454	360992
P06241	FYN	Tyrosine-protein kinase Fyn	9	222657	190282	293811	246196	202286	367203	222359	216308	224433	241973	163800	227200	243739	378869	207323	288502	262793	222359
Q13283	G3BP1	Ras GTPase-activating protein-binding protein 1	6	195772	213843	245747	279510	252427	253483	254161	300875	273436	230948	265463	221129	277046	214253	262992	325966	186792	201241
Q9UN86	G3BP2	Ras GTPase-activating protein-binding protein 2	4	195450	260415	247428	262354	318359	239683	223069	338984	234597	282476	223805	238556	202962	221211	206899	316880	231821	254877
P11413-2	G6PD	Isoform Long of Glucose-6-phosphate 1-dehydrogenase	29	1.03286e+06	1.08949e+06	1.50727e+06	1.05962e+06	1.4758e+06	1.50727e+06	1.06645e+06	1.51481e+06	1.24924e+06	1.41819e+06	1.16458e+06	1.14929e+06	1.00141e+06	1.17904e+06	1.22326e+06	1.65494e+06	1.187e+06	1.19634e+06
P60520	GABARAPL2	Gamma-aminobutyric acid receptor-associated protein-like 2	4	282683	347370	337360	314653	399960	342760	366206	349666	355948	356423	391193	358188	324298	301984	349534	404952	319248	365281
O14976	GAK	Cyclin-G-associated kinase	10	207969	205451	255813	281960	311885	264162	211248	281960	259043	246090	208882	407276	214881	191946	244864	274089	218240	206996
Q14376	GALE	UDP-glucose 4-epimerase	3	105416	152258	160788	170804	184464	158832	143902	178249	152505	170103	99395.4	81351.5	103470	92916.1	186245	191213	91474.6	101549
P51570-2	GALK1	Isoform 2 of Galactokinase	7	165689	189687	238938	198445	235469	233048	171602	274519	203604	245959	165689	127863	209901	169026	196079	246799	159579	161375
Q01415	GALK2	N-acetylgalactosamine kinase	6	192496	256239	312681	248648	387866	322268	229968	324273	282670	314944	238052	231879	243095	228603	261891	293181	290201	248215
Q96C23	GALM	Aldose 1-epimerase	5	368293	348872	316880	316288	285617	305423	228636	396518	275858	347272	175163	315908	303096	210485	305821	371026	258220	323234
Q10472	GALNT1	Polypeptide N-acetylgalactosaminyltransferase 1	4	55325.4	56424.5	93531.6	57040	86722.7	104456	47145.8	95500.6	63924.9	91130.7	37800.3	67607.9	41511	54294.2	67423.9	66275.4	48519.1	55950.5
Q10471	GALNT2	Polypeptide N-acetylgalactosaminyltransferase 2	6	420601	436274	332100	414332	356757	457290	536882	373993	379668	382935	363097	392654	445474	405497	390364	336982	444173	422744
P07902	GALT	Galactose-1-phosphate uridylyltransferase	2	187350	250430	174900	193488	201096	174900	264808	180261	205398	204567	220261	219524	199075	203770	199964	189987	208803	195435
Q14353	GAMT	Guanidinoacetate N-methyltransferase	4	319140	488115	210749	441410	274358	296708	342877	162618	330273	251112	312676	266064	342115	298413	349666	173430	355946	382410
Q9H2C0	GAN	Gigaxonin	2	115321	157555	143712	159079	123009	130042	150800	104410	128359	111693	119888	152138	114196	148440	109493	143609	174775	171846
P04406	GAPDH	Glyceraldehyde-3-phosphate dehydrogenase	19	2.80823e+06	2.69814e+06	4.34465e+06	3.13492e+06	3.81938e+06	4.15884e+06	2.89588e+06	3.7531e+06	3.55433e+06	3.88795e+06	2.45657e+06	3.28273e+06	2.02125e+06	2.95763e+06	3.13492e+06	3.55433e+06	2.80823e+06	2.80823e+06
Q14C86-6	GAPVD1	Isoform 6 of GTPase-activating protein and VPS9 domain-containing protein 1	16	368865	403896	539216	462877	551419	540354	674245	386059	466801	507519	394641	376621	376621	385865	477165	420355	448131	350159
P41250	GARS	Glycine--tRNA ligase	21	960260	920634	1.5461e+06	1.0099e+06	1.5003e+06	1.34686e+06	947960	1.13269e+06	1.17974e+06	1.55068e+06	957784	890944	913004	866466	1.08337e+06	1.4758e+06	1.02016e+06	1.05013e+06
P22102	GART	Trifunctional purine biosynthetic protein adenosine-3	18	328344	362026	391198	393987	417401	410937	354663	462528	365303	401574	388539	361733	366284	343397	371417	444755	372694	392196
Q99501	GAS2L1	GAS2-like protein 1	6	103735	112438	100665	97640.6	115435	100665	107797	85834.6	98911.2	109019	93502.4	89919.2	113474	109550	89039.2	107895	103010	81548.7
Q8NB37	GATD1	Glutamine amidotransferase-like class 1 domain-containing protein 1	1	136132	130040	124136	188215	217007	174499	126003	225335	192145	244421	134679	131362	115456	143349	146708	222614	136132	149312
A0A0B4J2D5	GATD3B	Glutamine amidotransferase-like class 1 domain-containing protein 3B, mitochondrial	9	1.30636e+06	681526	651226	948670	742234	486150	877013	468526	651584	590130	740036	892343	1.07563e+06	1.02911e+06	642547	682344	678844	860926
P50440	GATM	Glycine amidinotransferase, mitochondrial	3	188221	71421.9	147101	88005.4	224304	106924	96186.2	146346	134883	165677	96810.1	136257	138571	151052	176910	196839	82426.6	129284
Q9HCG7	GBA2	Non-lysosomal glucosylceramidase	4	203182	210802	207434	214784	223158	207099	199815	183129	197757	168449	212527	218618	209934	202490	236937	170417	233610	206781
Q04446	GBE1	1,4-alpha-glucan-branching enzyme	16	678458	641354	647337	645994	632901	633330	858038	638324	588745	609142	630118	534127	630118	648746	645021	740665	580248	499412
Q92538	GBF1	Golgi-specific brefeldin A-resistance guanine nucleotide exchange factor 1	13	186289	220191	230660	209081	236484	220074	206462	228785	210283	230358	196727	210920	181765	189800	201815	198330	211420	190200
P32456	GBP2	Guanylate-binding protein 2	3	96871.1	77942.9	197486	122303	131969	142445	91749.1	150421	116552	161320	87221.6	80370.3	91237.8	109643	120061	141052	65298.2	95539
Q96PP9	GBP4	Guanylate-binding protein 4	4	243206	308142	427448	353263	368631	329559	325245	371565	298710	387454	367291	260920	347809	381881	346787	355457	314544	298532
P02774-3	GC	Isoform 3 of Vitamin D-binding protein	28	5.54938e+06	5.93497e+06	870941	5.60137e+06	879498	1.02709e+06	7.7029e+06	1.27043e+06	5.98641e+06	964422	6.99632e+06	5.93497e+06	8.47441e+06	6.78457e+06	5.80322e+06	1.33057e+06	7.14551e+06	6.08942e+06
P28676	GCA	Grancalcin	6	484793	480627	909665	421861	681286	1.1834e+06	451309	829072	441410	568541	462517	371244	436743	519096	1.48238e+06	919682	438403	472262
Q8IWJ2	GCC2	GRIP and coiled-coil domain-containing protein 2	11	89504.9	92025.2	107522	104410	117282	116008	95145.4	110473	97614.5	124677	98491.4	81446.1	81446.1	92659.1	98846.2	116259	83992.2	105776
P48506	GCLC	Glutamate--cysteine ligase catalytic subunit	8	236885	242964	252629	243780	250850	278497	258482	277453	232945	284440	250710	238295	265942	373314	225828	262354	258341	225029
P48507	GCLM	Glutamate--cysteine ligase regulatory subunit	10	1.26579e+06	1.01765e+06	1.06714e+06	919682	929464	891515	1.03235e+06	831985	709832	909665	1.03132e+06	1.22663e+06	1.14185e+06	1.63162e+06	983710	832869	1.02104e+06	1.17151e+06
Q92616	GCN1	eIF-2-alpha kinase activator GCN1	9	104676	132369	120851	141294	150708	137148	112438	130959	148861	131837	154875	118696	108312	106170	159583	115712	99738.8	96012.3
P31150	GDI1	Rab GDP dissociation inhibitor alpha	25	698595	878073	1.49361e+06	839669	1.13079e+06	1.25852e+06	771243	1.10966e+06	847284	1.12141e+06	808112	817758	688417	719046	883762	2.23729e+06	797198	866434
P50395	GDI2	Rab GDP dissociation inhibitor beta	28	1.88079e+06	2.01172e+06	2.39191e+06	2.08143e+06	2.36639e+06	2.28075e+06	1.94812e+06	2.66674e+06	2.18312e+06	2.329e+06	2.00266e+06	1.98215e+06	1.85728e+06	1.88079e+06	2.03019e+06	3.06666e+06	1.92983e+06	2.13445e+06
Q8TEQ6	GEMIN5	Gem-associated protein 5	4	208759	86836.1	87822.9	95894.5	84695.4	81508.9	129686	84864.1	93960.7	80900.4	79452	61838.4	40460.6	109729	94107.8	93335	117146	106423
Q7L5D6	GET4	Golgi to ER traffic protein 4 homolog	2	89212.9	92917.6	95612.3	100546	95511.5	92574.9	94606.2	115108	86970	106093	87711.2	98813	58422.3	29743.9	82605.5	108482	67751.9	94606.2
Q9NXC2	GFOD1	Glucose-fructose oxidoreductase domain-containing protein 1	3	112018	98492.4	153435	130154	127028	136684	132684	131006	126821	120572	101790	106722	124416	123186	135565	113939	115508	108949
Q06210	GFPT1	Glutamine--fructose-6-phosphate aminotransferase [isomerizing] 1	9	244934	273365	266673	295269	254191	289526	232646	258732	270694	252639	298731	244934	244735	261733	271803	255632	233494	229403
Q9UJY5-6	GGA1	Isoform 6 of ADP-ribosylation factor-binding protein GGA1	3	130912	134590	104186	133119	115108	99610.5	133077	72735	122073	110762	139380	131167	128003	127409	129951	84641.9	136995	136852
Q9NZ52	GGA3	ADP-ribosylation factor-binding protein GGA3	3	258855	328053	373636	326166	431090	405484	293012	526063	359436	473951	273765	264028	267879	254209	300355	457290	306823	258204
Q9BVM4	GGACT	Gamma-glutamylaminecyclotransferase	1	72180.9	121667	107662	88380.2	90773.2	77404.7	90118	61713.6	97315	64071.5	100949	107599	89042.3	107121	133733	65510.2	107331	110061
O75223	GGCT	Gamma-glutamylcyclotransferase	8	361456	367398	393789	432780	429749	393229	414317	459771	414104	397677	405130	359254	481587	381426	385859	601946	378551	345876
Q92820	GGH	Gamma-glutamyl hydrolase	10	615302	514193	427205	586598	663429	482370	465535	642547	528764	530033	581593	565493	582861	558133	517119	721486	507156	496408
O95749	GGPS1	Geranylgeranyl pyrophosphate synthase	3	88629.5	121584	79050	91640.1	85403.4	82517.1	118494	94868.7	88165.5	88603.1	101297	109266	95238.6	120717	101003	88005.4	112981	111844
Q9NUV9	GIMAP4	GTPase IMAP family member 4	3	163025	141684	71541.6	100159	72640.5	95040	124812	140654	108306	76580	130561	164472	132696	166338	150186	82605.5	155663	110747
O14908	GIPC1	PDZ domain-containing protein GIPC1	4	136330	162440	305142	223662	303019	291652	178705	308692	241159	334458	117878	137326	111339	127375	268646	343680	165961	139470
Q8TF64	GIPC3	PDZ domain-containing protein GIPC3	7	247856	340045	279347	250515	337360	257661	335582	249997	281960	273035	294170	314236	275428	315230	262553	274185	299353	267446
Q9Y2X7-3	GIT1	Isoform 3 of ARF GTPase-activating protein GIT1	15	303443	276076	289644	306467	332404	290451	293887	320047	311412	329906	295988	287518	305750	272800	317756	264697	293161	273087
Q14161	GIT2	ARF GTPase-activating protein GIT2	7	166886	176854	113045	212742	124122	125766	164548	99197.8	188376	123564	146317	169941	164548	154062	150051	94752.1	159187	163506
P32189-4	GK	Isoform 4 of Glycerol kinase	12	210508	219597	195022	219416	179578	191213	213661	187692	208240	166136	193239	212344	212822	199357	186123	196079	226862	203483
P16278	GLB1	Beta-galactosidase	11	308751	317226	421084	371417	463209	441410	375181	466336	422372	440694	347968	303746	343719	311972	362053	530418	342284	379893
O94923	GLCE	D-glucuronyl C5-epimerase	5	201748	183928	179865	195922	224433	226553	137190	211036	189566	217280	172454	323293	178241	192664	185067	188675	180689	230991
Q9H4G4	GLIPR2	Golgi-associated plant pathogenesis-related protein 1	2	142361	112034	49999.3	62804.1	48797.9	42140.5	127499	62005.5	54431.5	49307	127499	67035.1	128845	111109	48491.4	65109.4	101238	115823
Q04760	GLO1	Lactoylglutathione lyase	9	708489	531418	645994	649143	634817	658257	510401	661285	682344	610660	568888	495791	588417	370295	577675	746741	520463	577373
Q9HC38-2	GLOD4	Isoform 2 of Glyoxalase domain-containing protein 4	13	507054	567752	451909	547895	519275	480646	521849	489617	476208	532390	569870	517759	508824	522719	513665	498311	527577	540660
P35754	GLRX	Glutaredoxin-1	3	236883	181066	298406	579731	346801	398026	783876	358963	493691	421046	272306	196832	267357	650009	557177	404171	227105	175902
O76003	GLRX3	Glutaredoxin-3	6	271676	273523	257511	238938	260618	242999	241225	280441	222614	255497	231579	238691	253981	259953	244252	307240	267598	307066
Q9NZD2	GLTP	Glycolipid transfer protein	4	116498	130064	194716	153277	190244	184676	143515	164644	159948	178172	128254	119385	123333	109829	164363	184901	127443	115970
P00367	GLUD1	Glutamate dehydrogenase 1, mitochondrial	20	513810	268305	739480	312164	781306	700802	280155	544848	498311	552038	257855	322283	282586	298726	451909	616049	250604	270562
P17900	GM2A	Ganglioside GM2 activator	1	54013.6	58371	145400	78107.5	61911.4	129612	45898.5	110180	64518.6	104628	60427.2	54246.3	50247.5	66226.3	73154.9	232168	57981.5	53033.5
O60547	GMDS	GDP-mannose 4,6 dehydratase	5	71768.1	83183.8	93874.6	80777.7	85238.5	93335	72593.9	79654.1	73154.9	83528.7	77044.7	70207.6	82583.9	65392.8	78411.4	92670.6	81989.3	69656.6
P60983	GMFB	Glia maturation factor beta	4	150615	210506	131859	181075	119522	135292	215384	130154	173772	128562	252961	182544	256832	173850	200067	133581	182833	187286
O60234	GMFG	Glia maturation factor gamma	7	503129	615351	1.14988e+06	679745	855238	957848	548585	721486	629070	860810	572999	588621	521000	556176	566161	1.06034e+06	559893	581572
Q9P107	GMIP	GEM-interacting protein	10	261453	276413	186580	207434	188580	190799	257777	192311	191213	184345	251813	231191	190683	221454	196030	162551	226690	219811
Q96IJ6-2	GMPPA	Isoform 2 of Mannose-1-phosphate guanyltransferase alpha	7	216585	138445	167378	168934	167150	164725	87277.1	168449	145063	154169	78515.7	76855.2	66278.6	77179.9	157538	201096	184859	125719
Q9Y5P6-2	GMPPB	Isoform 2 of Mannose-1-phosphate guanyltransferase beta	9	677387	712158	477741	571169	477741	451909	619323	461894	582089	471548	642009	591884	656564	633970	588010	512412	690913	673416
P36959	GMPR	GMP reductase 1	12	346094	561441	753063	508296	773139	716079	495826	694106	628310	676377	566817	497827	468526	572576	524656	836675	535899	697163
Q9P2T1-2	GMPR2	Isoform 2 of GMP reductase 2	8	196314	228703	143609	234106	166136	157171	207024	149437	204331	176140	244125	218749	249187	241546	167653	184565	266950	237477
P49915	GMPS	GMP synthase [glutamine-hydrolyzing]	9	125007	141958	146780	157171	145106	130868	132634	142926	136824	141712	154939	129607	148029	144641	116324	148935	146845	132634
Q14344	GNA13	Guanine nucleotide-binding protein subunit alpha-13	16	632149	321967	597548	445080	503638	627283	434176	563216	516789	566161	302195	364884	368595	408054	376748	477165	351227	384977
P08754	GNAI3	Guanine nucleotide-binding protein G(k) subunit alpha	12	41939.2	31306.1	49454.9	43806	40910	55687.8	26299.5	47185.4	37144.2	42914.5	30202	30512.7	34152.3	35717.1	40187	55300.4	37040.4	31143.1
P50148	GNAQ	Guanine nucleotide-binding protein G(q) subunit alpha	15	692973	275074	865589	428004	735337	932080	309163	939371	485578	851226	240700	290835	310872	373377	399960	691049	268170	327133
Q5JWF2	GNAS	Guanine nucleotide-binding protein G(s) subunit alpha isoforms XLas	6	221031	183463	412951	211582	319474	388411	190256	342333	226807	306909	152968	178416	145131	201479	219983	277453	151169	172634
P19086	GNAZ	Guanine nucleotide-binding protein G(z) subunit alpha	13	571716	405019	886512	482370	710644	834056	478966	842858	479618	629730	417588	421564	390379	440298	444022	759210	421113	534730
P62873	GNB1	Guanine nucleotide-binding protein G(I)/G(S)/G(T) subunit beta-1	10	768886	255867	873112	500883	590920	876620	353395	916085	489170	778826	271758	355640	342664	419572	441081	692498	322155	417513
O14775	GNB5	Guanine nucleotide-binding protein subunit beta-5	5	209222	204382	262100	239081	258465	252228	226216	233990	241798	227123	196231	220890	239092	205947	224103	263872	211201	209368
Q9Y223-2	GNE	Isoform 2 of Bifunctional UDP-N-acetylglucosamine 2-epimerase/N-acetylmannosamine kinase	1	79192.7	92797.2	69501.8	63494.6	67035.1	71653.2	69605.5	65815.5	55512.7	66381.5	118375	95235.9	101314	134224	69938.7	67771.5	67618.1	70489.3
P63218	GNG5	Guanine nucleotide-binding protein G(I)/G(S)/G(O) subunit gamma-5	2	57879.4	51067.6	96574.7	48277	66235.2	88026.4	57274.4	64877.4	51704.2	70664.5	54195.7	47331.8	41131.3	44205.5	58271.5	74594.6	51474.4	53566.3
P63211	GNGT1	Guanine nucleotide-binding protein G(T) subunit gamma-T1	1	1.40001e+06	591236	1.48673e+06	836675	1.02031e+06	2.03019e+06	824649	2.19611e+06	916085	1.42231e+06	671190	711928	660309	735398	630655	1.84744e+06	571968	850906
P36915	GNL1	Guanine nucleotide-binding protein-like 1	1	28789.2	37984.5	69171.7	65021.8	69729	53998.2	39501.7	61284.8	56567.5	67896	42213.9	37919	40417.6	39851.3	43414.2	66483.1	44575.2	39302.6
O15228	GNPAT	Dihydroxyacetone phosphate acyltransferase	7	304444	244295	204883	242534	201216	193488	356525	184676	235666	161961	215709	277421	227652	247620	250282	152919	221629	227869
P46926	GNPDA1	Glucosamine-6-phosphate isomerase 1	2	227761	211650	149474	141116	161481	167003	166794	164114	171989	141258	193488	165398	149202	161747	215389	192311	183824	230047
P15586	GNS	N-acetylglucosamine-6-sulfatase	7	646949	615581	363835	783960	313544	431640	685772	510198	541824	403842	653789	586250	637360	691929	615407	586319	631304	606099
Q08379	GOLGA2	Golgin subfamily A member 2	6	678907	767808	1.22566e+06	844602	1.29986e+06	1.12852e+06	654936	1.05029e+06	615407	1.25852e+06	536894	805502	759503	618228	622779	1.0935e+06	749236	645394
Q08378	GOLGA3	Golgin subfamily A member 3	9	143774	165028	170886	176724	177184	179290	163213	194435	153059	183919	170426	167016	165235	136695	165332	167283	167298	146803
Q14789-2	GOLGB1	Isoform 2 of Golgin subfamily B member 1	23	295363	297618	304051	301756	322824	315765	292105	298009	279510	314044	266865	267107	259599	244973	280441	320837	313798	288848
Q9H4A6	GOLPH3	Golgi phosphoprotein 3	5	142279	250954	212913	195489	220074	207884	293065	211916	186976	207434	176672	122371	172512	165194	180759	209602	243140	148460
Q9H4A5	GOLPH3L	Golgi phosphoprotein 3-like	2	137327	182658	170804	163355	191213	191884	185939	171268	145951	162096	161587	164559	131476	162277	176394	244044	178209	205999
Q9HD26	GOPC	Golgi-associated PDZ and coiled-coil motif-containing protein	7	172846	160289	190799	192233	188329	195747	182280	181156	178083	222006	147772	152725	154080	166340	163680	191884	169171	191651
Q9H8Y8-3	GORASP2	Isoform 3 of Golgi reassembly-stacking protein 2	7	108322	101064	187236	112129	169408	186976	111591	184565	135240	189268	98381	106357	100701	96383.5	125140	157766	106508	111930
O14653-2	GOSR2	Isoform B of Golgi SNAP receptor complex member 2	2	252143	243611	236282	187146	237726	257003	297028	249061	226273	248909	213758	160661	177726	257139	325511	218358	169270	241404
P17174	GOT1	Aspartate aminotransferase, cytoplasmic	12	739923	793172	694106	870315	590130	695098	870583	740665	830209	647337	908971	807164	910328	867906	845826	741342	822960	707923
P00505	GOT2	Aspartate aminotransferase, mitochondrial	17	894019	473606	908648	626037	973983	860810	628490	901884	827036	885004	527203	725893	653213	715759	761748	922103	508413	619145
P07359	GP1BA	Platelet glycoprotein Ib alpha chain	14	1.98461e+06	875736	3.7531e+06	1.38421e+06	3.68869e+06	4.23191e+06	1.21877e+06	3.78106e+06	1.75389e+06	4.28968e+06	857475	1.20744e+06	1.13362e+06	1.10543e+06	1.35338e+06	3.19343e+06	1.02477e+06	1.2005e+06
P13224-2	GP1BB	Isoform 2 of Platelet glycoprotein Ib beta chain	5	442671	170477	562580	346267	626037	595310	235716	724646	429749	837521	206440	203121	251209	226623	296708	510562	200201	224939
P40197	GP5	Platelet glycoprotein V	18	1.91781e+06	1.12537e+06	1.29433e+06	1.44595e+06	1.12312e+06	1.31532e+06	1.17454e+06	1.23786e+06	1.36246e+06	1.19384e+06	1.18236e+06	1.14614e+06	1.31834e+06	1.06775e+06	1.25509e+06	1.31243e+06	1.05981e+06	1.09614e+06
Q9HCN6	GP6	Platelet glycoprotein VI	9	471233	486791	855990	533576	606469	653252	492977	640050	579284	552400	465055	421574	475592	481863	589475	968072	544098	609985
P14770	GP9	Platelet glycoprotein IX	5	815904	288997	671803	431640	550164	755183	398604	313255	449154	575097	298955	324916	419345	382107	349132	336274	304829	354569
Q9NPB8	GPCPD1	Glycerophosphocholine phosphodiesterase GPCPD1	5	66883.5	43252.9	79233	80900.4	79233	72475.1	77037.7	72912.6	82080	74123.7	38238.6	60938.2	51482.9	103939	71864.4	83629.3	47694	39754.6
Q8N335	GPD1L	Glycerol-3-phosphate dehydrogenase 1-like protein	9	318905	375815	373758	329231	479494	374270	259331	412602	373991	353169	381177	328492	293266	266823	340359	386649	295457	252797
P43304	GPD2	Glycerol-3-phosphate dehydrogenase, mitochondrial	34	1.02033e+06	465132	1.31243e+06	605188	1.22938e+06	1.24924e+06	527423	1.08337e+06	749674	1.15203e+06	616363	556212	594751	497315	817420	913766	498365	488985
P06744-2	GPI	Isoform 2 of Glucose-6-phosphate isomerase	19	1.80774e+06	1.81424e+06	3.32959e+06	1.46836e+06	3.7531e+06	1.86434e+06	1.65765e+06	1.96864e+06	1.57384e+06	2.82803e+06	1.71935e+06	1.92674e+06	1.50926e+06	1.59898e+06	1.80466e+06	2.55371e+06	1.80108e+06	2.00601e+06
P80108	GPLD1	Phosphatidylinositol-glycan-specific phospholipase D	3	484044	539774	142009	511692	134526	126317	569460	147741	477165	139837	627732	467705	643363	496495	580348	138762	533910	424021
Q13098-7	GPS1	Isoform 2 of COP9 signalosome complex subunit 1	13	374223	503365	455919	451149	445570	616049	456369	488785	444373	447160	445285	499667	395944	458446	488785	580348	486467	420039
Q9Y4H4	GPSM3	G-protein-signaling modulator 3	2	118761	160473	128562	125999	112378	74297.6	110748	159016	81979.7	69053.6	133564	139164	134272	156365	60683.2	210283	125562	176168
P07203	GPX1	Glutathione peroxidase 1	11	917486	826752	740157	838738	774761	614378	1.02833e+06	729243	964422	720336	749818	762669	1.04002e+06	1.01925e+06	709832	678793	925374	875692
P22352	GPX3	Glutathione peroxidase 3	5	927230	851851	181488	701938	169623	172235	881360	194716	631142	203604	834411	608749	986580	900706	559542	256191	896623	692250
P36969	GPX4	Phospholipid hydroperoxide glutathione peroxidase	12	543604	697898	598256	592153	665768	931383	530426	541412	671803	649738	480111	518182	622760	666558	598256	845826	657666	730109
Q96SL4	GPX7	Glutathione peroxidase 7	5	397600	572273	419472	441771	588010	413345	623108	377318	422824	471828	585613	437053	371043	416097	386059	508769	668726	521259
O75791	GRAP2	GRB2-related adapter protein 2	7	517924	498755	689843	619582	688022	669952	605381	474469	633737	663284	562490	554268	568534	683075	638952	740192	500863	495945
Q13322	GRB10	Growth factor receptor-bound protein 10	2	74602.7	62462.4	105391	90402.1	94684.6	84878.3	81943.3	95555.4	92644.8	88292.6	78504.1	54170	79863.2	76152.2	79400.6	106810	81103.9	67782.9
P62993	GRB2	Growth factor receptor-bound protein 2	11	543200	637557	811243	594066	870315	862310	548003	898502	606469	870315	598471	540587	563829	528170	554290	830209	631387	662199
Q9UBQ7	GRHPR	Glyoxylate reductase/hydroxypyruvate reductase	6	247282	244876	158367	263231	136594	176068	242582	171900	228549	183518	257442	296405	258833	302531	225612	251515	238504	268085
Q4V328	GRIPAP1	GRIP1-associated protein 1	23	247257	286732	238659	267534	241688	247917	262265	244252	272170	269522	286150	289540	255834	263674	264517	277150	270767	326587
P25098	GRK2	Beta-adrenergic receptor kinase 1	14	456829	512879	511039	460473	548482	534042	532056	562580	455617	525090	479454	636662	466330	491191	474738	524656	521670	453369
P34947	GRK5	G protein-coupled receptor kinase 5	7	302850	244066	395942	320047	429606	429606	311948	450809	356423	451446	300512	231727	348698	252878	322066	324782	299428	230653
P43250-2	GRK6	Isoform GRK6B of G protein-coupled receptor kinase 6	11	232082	277769	215721	265931	218027	223362	256446	238659	231243	227659	270028	225499	263774	237820	202286	238531	270028	264961
A4D1B5	GSAP	Gamma-secretase-activating protein	6	249783	230343	240528	250850	217688	199872	275332	180179	240528	219559	220179	196000	225826	204101	270233	155046	230054	200956
P57764	GSDMD	Gasdermin-D	6	121128	150922	138684	129612	126112	114614	138397	135382	122369	156601	165088	151482	137613	131623	110538	123598	145169	143730
P49840	GSK3A	Glycogen synthase kinase-3 alpha	11	1.07556e+06	1.23355e+06	494325	944489	471217	450809	1.04436e+06	469551	756680	431090	1.00357e+06	1.06644e+06	948963	1.09621e+06	788391	417014	1.10757e+06	1.12748e+06
P49841-2	GSK3B	Isoform 2 of Glycogen synthase kinase-3 beta	10	348133	378120	220947	298123	208486	206205	366728	185720	294120	208882	329536	350540	361892	350178	304819	232945	377937	326373
Q9P0R6	GSKIP	GSK3B-interacting protein	1	132021	166499	130200	115045	140521	135714	153681	104628	154169	119068	134518	157617	142861	125906	127344	127152	142861	145434
P06396	GSN	Gelsolin	34	4.30811e+06	4.31668e+06	5.15052e+06	3.81938e+06	5.47217e+06	4.42591e+06	4.60544e+06	5.67522e+06	4.07841e+06	4.74186e+06	4.18954e+06	4.18264e+06	3.3155e+06	4.03556e+06	4.34465e+06	5.60137e+06	3.8056e+06	5.08062e+06
P15170-3	GSPT1	Isoform 3 of Eukaryotic peptide chain release factor GTP-binding subunit ERF3A	12	592784	601473	594754	645021	616049	588745	724251	631936	618460	621608	598671	778542	551186	677619	666646	689634	600653	682512
P00390	GSR	Glutathione reductase, mitochondrial	17	516140	605692	940200	614378	935726	848174	603513	995460	721486	847284	610386	613804	553024	604311	618057	1.01294e+06	587258	659658
P48637	GSS	Glutathione synthetase	17	997735	1.05495e+06	1.74135e+06	1.05767e+06	1.46836e+06	1.71375e+06	963223	1.66948e+06	1.14988e+06	1.88809e+06	1.07331e+06	992483	1.02875e+06	942434	923683	1.51972e+06	1.03079e+06	1.08089e+06
Q9Y2Q3	GSTK1	Glutathione S-transferase kappa 1	10	599885	378212	866573	570793	1.03571e+06	857935	489841	714524	679745	771822	361428	564979	491172	620951	693410	764944	380442	416363
P09488	GSTM1	Glutathione S-transferase Mu 1	8	2.12827e+06	2.52809e+06	558369	3.42578e+06	766307	726220	3.15689e+06	1.20474e+06	2.68534e+06	737170	6.49151e+06	2.24046e+06	2.58369e+06	6.07666e+06	4.15884e+06	583956	8.10105e+06	1.85818e+06
P28161	GSTM2	Glutathione S-transferase Mu 2	12	707280	586672	508769	939371	569778	518837	839084	656185	907753	582089	1.04757e+06	562682	1.04103e+06	832905	1.15448e+06	522159	1.0051e+06	810761
P21266	GSTM3	Glutathione S-transferase Mu 3	12	272662	365452	380339	292624	563797	352374	397432	377850	339235	396518	305551	345462	348345	299145	300668	381374	338855	370606
P78417	GSTO1	Glutathione S-transferase omega-1	15	1.36483e+06	1.60934e+06	3.10561e+06	1.42605e+06	3.0423e+06	3.02858e+06	1.55784e+06	2.96418e+06	1.71375e+06	2.98427e+06	1.20944e+06	1.75261e+06	1.33264e+06	1.53527e+06	2.04467e+06	3.00751e+06	1.23308e+06	1.73524e+06
P09211	GSTP1	Glutathione S-transferase P	10	1.33736e+06	1.43257e+06	2.30297e+06	1.06429e+06	2.51488e+06	1.69718e+06	1.52857e+06	1.83067e+06	1.74135e+06	2.18312e+06	1.46666e+06	1.65284e+06	1.26132e+06	1.1695e+06	1.76725e+06	2.35711e+06	1.40048e+06	1.37885e+06
O43708	GSTZ1	Maleylacetoacetate isomerase	1	81597.3	83524.3	92744.1	91045.9	99610.5	86731.5	82772.1	84695.4	78411.4	78325.9	66195.3	70010.6	70632.1	76497.3	89172.5	90556.3	85640.9	75198.1
Q9Y5Q8-3	GTF3C5	Isoform 3 of General transcription factor 3C polypeptide 5	1	240424	246907	181731	268162	195197	189268	272051	216408	198330	193098	270519	262088	250462	232702	223503	156813	310736	290772
O00178	GTPBP1	GTP-binding protein 1	5	296525	406530	351343	325307	370051	397677	334318	421084	302138	358890	388198	344746	334883	331506	302138	484779	360301	433653
Q9BX10	GTPBP2	GTP-binding protein 2	15	763070	907051	736317	698353	778212	807139	759488	827036	745634	836675	778885	822222	730385	753339	700802	822038	789946	836432
Q02108	GUCY1A1	Guanylate cyclase soluble subunit alpha-1	25	975474	1.15631e+06	1.56045e+06	1.15448e+06	1.65929e+06	1.04535e+06	1.23057e+06	1.26313e+06	1.33862e+06	1.50543e+06	963503	1.13415e+06	1.01769e+06	990724	1.34686e+06	1.32809e+06	1.15986e+06	994572
Q02153	GUCY1B1	Guanylate cyclase soluble subunit beta-1	22	1.25486e+06	1.34926e+06	875357	1.16864e+06	891515	819728	1.27083e+06	765587	1.12852e+06	840641	1.20793e+06	1.41262e+06	1.27494e+06	1.40554e+06	907753	802971	1.35565e+06	1.28586e+06
P08236	GUSB	Beta-glucuronidase	8	311599	352960	416676	344398	420047	421861	366626	431391	387866	387866	375613	343372	341230	356697	366128	461894	366180	386709
P46976	GYG1	Glycogenin-1	5	744377	861014	838738	779555	864043	995460	805283	862310	848174	758535	817758	820014	770790	849888	832869	1.02465e+06	876037	910008
P13807	GYS1	Glycogen [starch] synthase, muscle	9	283371	279796	125999	225335	128720	152828	261016	167653	184676	120755	245405	257841	216262	274167	273292	177806	251177	311516
Q14520	HABP2	Hyaluronan-binding protein 2	8	426969	373541	133119	319908	167845	148598	432295	165677	331168	143974	556224	406882	562322	431856	406032	190950	485573	300026
Q9P035	HACD3	Very-long-chain (3R)-3-hydroxyacyl-CoA dehydratase 3	4	123006	31629	168693	118783	211416	167378	120917	121542	150186	155664	105419	81077.9	108355	103907	156601	134796	107709	75262.4
Q5VWC8	HACD4	Very-long-chain (3R)-3-hydroxyacyl-CoA dehydratase 4	3	170291	72870.7	1.05962e+06	186580	837521	883762	211772	594066	353566	865589	132848	180347	187812	150266	380932	401864	127756	121731
Q16836-2	HADH	Isoform 2 of Hydroxyacyl-coenzyme A dehydrogenase, mitochondrial	12	3.12686e+06	866701	1.17137e+06	1.77749e+06	1.20245e+06	1.16078e+06	1.4966e+06	1.58278e+06	2.12792e+06	1.08658e+06	1.37794e+06	1.92938e+06	1.88035e+06	2.19855e+06	1.82136e+06	1.2607e+06	877079	1.63939e+06
P40939	HADHA	Trifunctional enzyme subunit alpha, mitochondrial	25	2.25744e+06	774354	1.99915e+06	1.0935e+06	1.75389e+06	2.08143e+06	879832	1.51972e+06	1.25509e+06	1.84316e+06	812604	1.08495e+06	970416	916014	1.33057e+06	1.5003e+06	708089	737198
P55084	HADHB	Trifunctional enzyme subunit beta, mitochondrial	18	1.08111e+06	690956	1.39197e+06	742234	1.47891e+06	1.32306e+06	771470	1.46836e+06	966901	1.35338e+06	773789	843258	676474	650259	1.12312e+06	1.05767e+06	910181	908022
Q16775	HAGH	Hydroxyacylglutathione hydrolase, mitochondrial	7	201644	228087	172965	205877	171729	187316	209090	179134	219416	186654	257209	241894	197599	263385	188215	219270	249559	217865
P12081	HARS	Histidine--tRNA ligase, cytoplasmic	22	709476	831390	966901	724646	832869	963223	785899	954293	807139	920203	744417	808967	707751	805613	787217	1.074e+06	766993	897275
P69905	HBA1	Hemoglobin subunit alpha	9	1.05324e+07	3.60017e+06	8.86879e+07	7.636e+06	1.9286e+07	8.86879e+07	6.18627e+06	2.78968e+07	9.60708e+06	3.1574e+07	4.91036e+06	5.60635e+06	9.48087e+06	2.68655e+07	1.11022e+07	8.86879e+07	3.38049e+06	2.93468e+06
P68871	HBB	Hemoglobin subunit beta	12	8.42585e+06	3.85782e+06	2.16378e+07	6.80586e+06	1.04277e+07	1.9286e+07	4.90352e+06	1.39819e+07	7.17461e+06	1.39819e+07	4.50176e+06	5.23045e+06	7.14627e+06	1.85774e+07	7.89707e+06	1.9286e+07	3.56218e+06	3.26948e+06
P02042	HBD	Hemoglobin subunit delta	11	1.27363e+06	923587	1.37361e+06	1.11245e+06	707187	1.41307e+06	922164	1.13079e+06	834056	1.05767e+06	957343	945922	1.2458e+06	3.02504e+06	862310	1.50727e+06	840606	787858
P02100	HBE1	Hemoglobin subunit epsilon	3	719866	689489	593938	681312	416131	566094	631224	438285	649405	516217	579134	512144	911193	1.00769e+06	669468	720277	597489	314279
P69891	HBG1	Hemoglobin subunit gamma-1	10	382060	291197	1.56376e+06	338041	301399	2.24947e+06	287328	650332	270064	372074	229932	225183	289057	523855	366830	809593	339464	197865
Q6B0K9	HBM	Hemoglobin subunit mu	2	109778	79466.7	83092.5	73215.6	54897.6	141712	93509.7	93874.6	76254.3	63035	81329.6	76789.7	78757.3	106339	94730.3	119959	73137.8	65676.5
P09105	HBQ1	Hemoglobin subunit theta-1	1	61946	64380.4	52804.5	49454.9	40320.6	56231.6	64842.6	54372.1	43889.2	40825.6	62059	45048	80664.5	120761	47800.1	67986.9	48705.5	46305.1
Q9Y450	HBS1L	HBS1-like protein	6	131811	154855	164114	148048	179290	158588	148980	167283	160355	174115	162392	144360	151374	144840	147186	151918	157728	159903
P14317	HCLS1	Hematopoietic lineage cell-specific protein	9	196505	268892	216487	241798	182511	206493	189906	209979	258465	205613	240377	270255	169350	225781	230948	195489	223351	259244
Q9UBN7	HDAC6	Histone deacetylase 6	5	166276	170712	208240	171268	215047	194514	181729	219009	178172	204169	163584	151997	178536	143372	181075	186580	166395	156743
P51858	HDGF	Hepatoma-derived growth factor	9	240156	301288	461894	248447	406032	373993	260328	554699	303687	498641	266035	273258	248199	257098	242406	414332	242412	295460
Q9H0R4	HDHD2	Haloacid dehalogenase-like hydrolase domain-containing protein 2	9	351694	343341	505322	342590	507519	455277	341920	471217	358391	429406	379027	353221	281655	398900	373636	445919	385816	342563
Q00341	HDLBP	Vigilin	14	388092	417890	294400	363508	308286	303537	387142	318184	323341	304558	402647	377756	390538	378801	302553	295085	389971	407731
Q86XA9	HEATR5A	HEAT repeat-containing protein 5A	5	60662.2	110680	109493	119153	133985	115379	89957.9	116796	118671	112620	96203.2	91948.2	90296.2	103408	107410	125240	97754.3	118377
Q9P2D3	HEATR5B	HEAT repeat-containing protein 5B	8	126087	151102	123774	122073	132256	123995	126558	130608	121542	125490	121254	130446	124234	141051	126821	106747	129914	118259
Q9NRV9	HEBP1	Heme-binding protein 1	4	82179.9	92751.6	98078.3	82080	120446	79821.9	106100	103547	90267.4	81979.7	80843.2	167020	112058	130382	89781.1	133865	62426.4	128139
Q9Y5Z4	HEBP2	Heme-binding protein 2	6	250952	274649	168216	234597	257197	228016	240400	206493	272928	194514	239529	231203	230212	216457	223662	285213	201419	253619
Q5T447	HECTD3	E3 ubiquitin-protein ligase HECTD3	20	515502	586851	411443	498311	433104	401574	605745	391198	511692	412532	528786	605156	534721	514078	521257	340907	600064	463209
Q5GLZ8	HERC4	Probable E3 ubiquitin-protein ligase HERC4	11	187553	178883	176334	170886	205519	184955	184673	204476	178827	189701	171498	195012	195720	196575	192782	187236	175750	153045
P06865	HEXA	Beta-hexosaminidase subunit alpha	6	177800	202658	210283	199678	155046	220947	214784	142198	161226	155258	205088	183681	209639	195298	181156	242534	190886	223443
P07686	HEXB	Beta-hexosaminidase subunit beta	11	341757	355431	492873	352068	444755	447972	360512	507155	365135	408258	352916	293728	363650	375787	366579	703896	346239	371620
O94992	HEXIM1	Protein HEXIM1	3	139805	222122	190565	240712	206899	184565	187241	131914	165861	180465	226810	191701	139685	187367	142861	172525	234929	252198
Q96MH2	HEXIM2	Protein HEXIM2	1	195150	250707	26970.1	111025	33341.2	32096.4	198206	47619.3	42652	40753.2	207340	212358	183457	211488	38477.1	47557.5	237181	249846
Q93099	HGD	Homogentisate 1,2-dioxygenase	3	202964	250400	292624	294400	258036	351076	230335	245081	278781	199581	248272	192866	237129	232204	184565	284440	223061	229986
Q04756	HGFAC	Hepatocyte growth factor activator	5	478470	606808	227343	489170	394342	444373	498583	439090	498641	386059	538104	448861	650273	515737	378423	360875	551192	459815
O14964	HGS	Hepatocyte growth factor-regulated tyrosine kinase substrate	16	142846	165233	190421	180916	218624	188448	153226	175445	182839	197405	163192	149890	161503	151997	171268	167003	176223	169483
Q6NVY1	HIBCH	3-hydroxyisobutyryl-CoA hydrolase, mitochondrial	7	264054	157661	192145	138333	221450	184464	158289	209399	173839	183321	162704	181908	223282	215112	185185	190799	166745	192728
Q9NWT6	HIF1AN	Hypoxia-inducible factor 1-alpha inhibitor	4	157920	165094	127028	143463	141501	122596	181468	138511	152058	144382	137381	138458	142597	167405	133985	149622	164872	168462
Q53FT3	HIKESHI	Protein Hikeshi	4	247100	285596	254521	283101	255497	246518	289168	201096	311990	252427	320173	268038	264941	262447	250515	273292	277043	268821
P49773	HINT1	Histidine triad nucleotide-binding protein 1	4	547800	680435	454975	611476	456966	501117	661967	520425	578425	523742	672179	659753	595607	639480	674602	547292	710304	705372
Q9BX68	HINT2	Histidine triad nucleotide-binding protein 2, mitochondrial	5	436707	184637	305947	419780	315325	305315	282268	310649	410790	313373	247755	316395	358757	377094	344996	412276	238474	301919
Q9NQE9	HINT3	Histidine triad nucleotide-binding protein 3	2	221916	246891	532614	356757	513204	354107	294643	216836	339784	462139	296974	266402	237462	258127	324273	159855	268759	246183
P16402	HIST1H1D	Histone H1.3	8	567262	375635	894102	622026	937448	2.04467e+06	336807	1.41307e+06	633821	896041	382348	399450	458197	492711	604309	856562	395006	347576
P62805	HIST1H4A	Histone H4	4	242998	180650	167653	178334	205398	298331	216595	189987	177625	273292	224859	158380	223478	319757	182421	125337	327677	196877
Q5QNW6-2	HIST2H2BF	Isoform 2 of Histone H2B type 2-F	3	843497	481384	548482	426414	592557	1.09822e+06	667188	897404	513204	817420	597671	497721	596409	1.12784e+06	592153	555210	827259	486749
P19367-3	HK1	Isoform 3 of Hexokinase-1	40	2.638e+06	2.6935e+06	3.72083e+06	2.30297e+06	3.42578e+06	3.17206e+06	2.5665e+06	3.10561e+06	2.49793e+06	3.10561e+06	1.74677e+06	2.31113e+06	2.07635e+06	2.50538e+06	2.55371e+06	2.84839e+06	2.638e+06	2.58277e+06
P13747	HLA-E	HLA class I histocompatibility antigen, alpha chain E	10	137918	100075	215552	145400	164725	159421	131859	441644	154248	232308	221234	128579	138480	189762	159523	173687	83131.9	137378
P09429	HMGB1	High mobility group protein B1	4	370842	411818	164725	256037	183217	264697	274402	281033	255693	176334	326022	499284	320461	413797	292744	228016	301072	337267
P26583	HMGB2	High mobility group protein B2	4	138120	86845.4	173849	112221	179019	234922	106522	139567	150785	152940	99902.2	117191	89411.5	147884	147740	180696	55455.4	61912.9
P35914	HMGCL	Hydroxymethylglutaryl-CoA lyase, mitochondrial	9	159505	109022	213444	125566	204710	194017	131189	181075	163507	190421	118736	142016	137574	152645	159079	220391	104602	144269
P09651	HNRNPA1	Heterogeneous nuclear ribonucleoprotein A1	4	359373	205145	129998	216487	141657	158472	149003	164973	223362	130042	249006	453342	282834	291329	138684	152768	203025	345460
P22626	HNRNPA2B1	Heterogeneous nuclear ribonucleoproteins A2/B1	8	675869	410068	550892	471057	565743	632901	377963	736317	489617	582913	383899	681492	419764	513052	541412	627283	374464	453918
P51991	HNRNPA3	Heterogeneous nuclear ribonucleoprotein A3	5	148018	177943	136472	137001	141192	157766	137216	163222	140450	139638	142164	157095	148018	157311	133439	120755	153468	152987
P07910	HNRNPC	Heterogeneous nuclear ribonucleoproteins C1/C2	7	552092	363613	369518	319474	341860	450359	288742	547292	345183	333495	393193	468463	341169	347820	290701	322066	317165	343797
Q14103	HNRNPD	Heterogeneous nuclear ribonucleoprotein D0	6	159828	124467	207884	130376	209979	343680	139342	348330	179290	218514	143366	183595	130751	141946	220391	223503	102350	119912
O14979	HNRNPDL	Heterogeneous nuclear ribonucleoprotein D-like	4	127856	152463	116861	97053.3	106093	123351	157707	146228	94051.1	117975	121989	162099	95379.4	131774	86507.5	120370	115496	139559
P52597	HNRNPF	Heterogeneous nuclear ribonucleoprotein F	4	176133	205438	315765	226052	314944	364921	202040	173988	265654	278497	186401	211210	182970	210459	219009	189701	192819	196563
P31942	HNRNPH3	Heterogeneous nuclear ribonucleoprotein H3	2	78956.1	77436.7	93789	102925	87320.3	108562	93822.6	116390	88203.3	85288.3	99549.2	96409.9	86574.6	86489.8	86452	124773	81171.3	84845.9
P61978-3	HNRNPK	Isoform 3 of Heterogeneous nuclear ribonucleoprotein K	16	864444	1.11088e+06	1.52808e+06	855238	1.6154e+06	1.43326e+06	912524	1.78378e+06	1.08555e+06	1.5461e+06	983917	989461	965453	889685	1.14402e+06	1.25245e+06	1.06239e+06	1.00724e+06
Q00839	HNRNPU	Heterogeneous nuclear ribonucleoprotein U	4	203360	67439.5	115465	84104	117105	174386	67254	144382	107808	112246	65375.4	144873	78721.4	103513	98147.4	108136	69936.1	57480.7
Q9NSB8	HOMER2	Homer protein homolog 2	2	268665	234633	171377	232100	161251	168463	209459	173207	203688	199491	188068	257746	208084	264140	210398	248422	228169	237609
Q86VS8	HOOK3	Protein Hook homolog 3	13	213062	252357	266498	274519	302138	269245	223775	302553	262992	280441	300033	242066	287285	219988	255813	309920	258756	250902
P00738	HP	Haptoglobin	23	5.67278e+06	2.38419e+06	2.78445e+06	7.89707e+06	2.76314e+06	2.71306e+06	7.17461e+06	1.80466e+06	6.50801e+06	2.76314e+06	6.89283e+06	3.95285e+06	7.17461e+06	6.89283e+06	6.74418e+06	2.74254e+06	6.89283e+06	9.50047e+06
P37235	HPCAL1	Hippocalcin-like protein 1	12	437858	419517	689096	459771	520976	658849	412973	629070	459771	744536	446370	466833	453842	461848	534042	684012	418357	412359
P00739-2	HPR	Isoform 2 of Haptoglobin-related protein	19	662276	584841	271412	896041	256562	293486	895387	220709	790292	210457	762408	628197	838857	729827	686145	270233	809777	647068
P00492	HPRT1	Hypoxanthine-guanine phosphoribosyltransferase	10	1.33953e+06	1.71259e+06	1.34686e+06	1.43833e+06	1.22326e+06	1.25719e+06	1.5663e+06	1.371e+06	1.30948e+06	1.19066e+06	1.56771e+06	1.53754e+06	1.40768e+06	1.53651e+06	1.22938e+06	1.58278e+06	1.43056e+06	1.64831e+06
Q92902	HPS1	Hermansky-Pudlak syndrome 1 protein	4	111893	139923	155046	144599	144986	126442	154438	140760	146600	155877	135166	102336	130522	127773	145277	121107	128923	125412
Q9Y251	HPSE	Heparanase	16	1.24098e+06	1.69589e+06	1.42605e+06	1.40754e+06	1.50543e+06	1.46836e+06	2.14767e+06	1.50543e+06	1.47183e+06	1.4758e+06	1.51051e+06	1.47124e+06	1.40737e+06	1.66458e+06	1.58278e+06	1.66948e+06	1.94523e+06	1.44039e+06
P02790	HPX	Hemopexin	16	4.28975e+06	3.49647e+06	976622	3.55433e+06	894102	1.13079e+06	3.923e+06	1.08658e+06	2.57063e+06	1.10317e+06	3.66588e+06	3.24975e+06	5.00501e+06	3.94115e+06	3.19343e+06	1.30255e+06	3.61774e+06	3.24975e+06
P04196	HRG	Histidine-rich glycoprotein	13	3.15168e+06	2.67404e+06	706667	2.61319e+06	675600	651226	2.61046e+06	913766	2.05672e+06	723244	3.17744e+06	2.87016e+06	3.20967e+06	3.35224e+06	2.29456e+06	935726	2.83426e+06	2.53231e+06
Q53T59	HS1BP3	HCLS1-binding protein 3	6	153732	163324	216094	146228	175943	187442	133549	185658	157538	175063	141049	176016	127278	169970	146500	279510	146842	189665
Q99714	HSD17B10	3-hydroxyacyl-CoA dehydrogenase type-2	11	574412	188397	509860	319731	553762	500445	316057	571169	429406	497367	274312	390617	358387	397047	427855	656185	205079	307977
Q8NBQ5	HSD17B11	Estradiol 17-beta-dehydrogenase 11	10	551036	216780	860810	445919	840641	735337	376628	902806	570793	753063	242174	372139	328992	388410	544848	795200	271612	286681
Q53GQ0	HSD17B12	Very-long-chain 3-oxoacyl-CoA reductase	9	462075	184692	440288	261794	370557	401864	243939	352979	329906	365303	220239	308775	271020	240607	314826	313761	228944	218157
P51659	HSD17B4	Peroxisomal multifunctional enzyme type 2	27	1.45183e+06	1.02112e+06	1.5111e+06	1.45607e+06	1.67544e+06	1.51481e+06	1.31375e+06	1.63994e+06	1.40754e+06	1.47183e+06	1.16636e+06	1.3813e+06	1.19012e+06	1.40966e+06	1.40168e+06	1.36622e+06	1.23049e+06	1.53448e+06
Q3SXM5	HSDL1	Inactive hydroxysteroid dehydrogenase-like protein 1	7	265121	168110	354881	182681	338041	277285	187132	288243	230660	310892	186717	196168	193110	186250	259043	254084	177712	172709
P07900-2	HSP90AA1	Isoform 2 of Heat shock protein HSP 90-alpha	35	2.88802e+06	3.14656e+06	3.96204e+06	3.19343e+06	5.31154e+06	3.4729e+06	3.27406e+06	4.6593e+06	3.02858e+06	4.34465e+06	3.22028e+06	2.79298e+06	3.22028e+06	2.91982e+06	3.51818e+06	4.23191e+06	3.22028e+06	2.70026e+06
P08238	HSP90AB1	Heat shock protein HSP 90-beta	33	869666	1.03201e+06	868318	933851	1.02465e+06	875357	976500	1.03898e+06	980866	893317	982404	1.06108e+06	859857	926754	1.02031e+06	932080	1.04393e+06	922282
P14625	HSP90B1	Endoplasmin	43	2.83346e+06	2.86639e+06	3.02858e+06	2.74254e+06	3.55433e+06	3.00751e+06	3.09577e+06	2.98427e+06	2.71306e+06	3.13492e+06	2.48604e+06	2.73803e+06	2.36205e+06	2.67859e+06	2.57063e+06	3.42578e+06	2.76507e+06	3.53951e+06
P48723	HSPA13	Heat shock 70 kDa protein 13	1	52586.3	71299.8	85550.4	60790.6	81186.9	96011.6	47545.5	80819.8	66501.7	89110.2	49842.7	36964.5	55301.3	60008.1	56466.2	103907	71798.1	61407
P0DMV9	HSPA1B	Heat shock 70 kDa protein 1B	30	945615	982729	1.21085e+06	968072	1.43326e+06	1.2607e+06	935390	1.25245e+06	1.02709e+06	1.08555e+06	961571	1.02826e+06	936428	922432	913766	1.27402e+06	1.0051e+06	994685
P54652	HSPA2	Heat shock-related 70 kDa protein 2	13	88718.9	136169	125781	114555	127751	86700	115199	112040	103051	109593	134342	121722	102366	136815	97008	115733	134074	146663
P34932	HSPA4	Heat shock 70 kDa protein 4	38	855095	890440	1.0099e+06	965819	1.09822e+06	1.06975e+06	932660	1.12453e+06	969962	1.06829e+06	894102	931459	873627	892342	879498	1.19929e+06	955568	962225
P11021	HSPA5	Endoplasmic reticulum chaperone BiP	38	2.72702e+06	2.42205e+06	3.63366e+06	2.68534e+06	4.50457e+06	4.34465e+06	2.34462e+06	3.81938e+06	2.91821e+06	3.78106e+06	2.07053e+06	2.2102e+06	2.34462e+06	2.32955e+06	2.6308e+06	4.42591e+06	2.34462e+06	2.67315e+06
P11142	HSPA8	Heat shock cognate 71 kDa protein	35	5.0612e+06	5.79429e+06	3.88795e+06	6.35198e+06	4.07841e+06	4.02268e+06	5.3862e+06	4.28968e+06	5.04201e+06	4.02268e+06	5.0612e+06	5.42103e+06	4.5465e+06	5.27675e+06	5.15052e+06	3.96204e+06	5.30529e+06	5.75247e+06
P38646	HSPA9	Stress-70 protein, mitochondrial	30	2.15129e+06	564355	1.26766e+06	1.39197e+06	1.36246e+06	1.27043e+06	944521	1.2345e+06	1.24578e+06	1.2607e+06	775586	1.31564e+06	1.07843e+06	1.28913e+06	1.42605e+06	1.27666e+06	629282	1.04472e+06
P04792	HSPB1	Heat shock protein beta-1	13	901804	976343	1.68023e+06	882117	2.04331e+06	1.50363e+06	1.06134e+06	2.03175e+06	1.93613e+06	3.38261e+06	1.784e+06	894008	1.21268e+06	1.53125e+06	1.54888e+06	1.20316e+06	1.36001e+06	1.65744e+06
Q9Y547	HSPB11	Intraflagellar transport protein 25 homolog	1	89259.2	133376	128841	107945	110366	123944	116421	79407	105116	120203	160170	126630	103323	108920	123351	152571	127400	162530
P10809	HSPD1	60 kDa heat shock protein, mitochondrial	31	6.11772e+06	2.25963e+06	1.58797e+06	6.06176e+06	1.66948e+06	1.74135e+06	2.97834e+06	1.62818e+06	4.02268e+06	1.5362e+06	2.73299e+06	3.3512e+06	3.29357e+06	3.62347e+06	1.56376e+06	1.9231e+06	2.50675e+06	2.83378e+06
P61604	HSPE1	10 kDa heat shock protein, mitochondrial	9	929823	189912	1.4501e+06	466336	1.5362e+06	1.59557e+06	328963	1.65929e+06	922103	1.34421e+06	311332	483089	493072	562498	844602	2.29456e+06	240801	415546
P98160	HSPG2	Basement membrane-specific heparan sulfate proteoglycan core protein	1	180680	219698	42652	153860	46744.9	59366.7	217514	60273.3	148598	46744.9	173848	213075	205322	202909	113939	60119.9	235129	165149
Q9BUP3-3	HTATIP2	Isoform 3 of Oxidoreductase HTATIP2	3	163399	159750	139091	119690	195318	119522	181583	129734	128214	275290	120811	168778	159932	146679	140101	168834	131848	175055
O43464	HTRA2	Serine protease HTRA2, mitochondrial	2	232283	257770	206899	216094	269008	284841	249196	120941	276274	138633	322943	282145	336092	248794	340027	175557	306839	298063
P42858	HTT	Huntingtin	35	500554	519238	723244	579284	716628	711914	610599	710644	598580	636110	516676	553601	527534	558974	622026	689096	565828	419180
Q7Z6Z7	HUWE1	E3 ubiquitin-protein ligase HUWE1	43	470252	475150	680377	544415	727025	687694	461342	689634	586319	674602	421516	451689	462636	456620	589083	642547	562087	427458
Q5T013	HYI	Putative hydroxypyruvate isomerase	4	206371	275967	466336	277682	470113	527732	251611	277285	301149	268385	238758	230148	206371	216180	312905	318611	229547	261940
Q9Y4L1	HYOU1	Hypoxia up-regulated protein 1	37	1.38568e+06	1.66362e+06	1.41307e+06	1.50543e+06	1.5461e+06	1.4501e+06	1.71724e+06	1.60387e+06	1.62818e+06	1.46388e+06	1.63955e+06	1.77133e+06	1.55966e+06	1.70725e+06	1.55436e+06	1.79976e+06	1.66362e+06	1.78031e+06
Q9NX55	HYPK	Huntingtin-interacting protein K	1	150975	153992	157966	148729	188215	159154	138575	448442	158239	172965	163946	166477	154907	158122	142009	284226	172067	178922
Q2TAA2	IAH1	Isoamyl acetate-hydrolyzing esterase 1 homolog	7	440612	432750	260024	314944	251037	256037	463007	238394	288502	252228	456663	412498	417772	475740	345183	294400	434633	440612
P41252	IARS	Isoleucine--tRNA ligase, cytoplasmic	15	279021	377826	318184	293486	374224	317756	333302	304721	292057	344398	316926	424589	336661	300909	324782	259219	334111	324012
Q9NSE4	IARS2	Isoleucine--tRNA ligase, mitochondrial	17	406150	119499	341280	241327	356156	334053	215662	301399	291652	309190	157214	237420	232768	254018	288691	335132	142382	152034
P13598	ICAM2	Intercellular adhesion molecule 2	5	423671	252797	773902	330511	690410	633928	237959	685879	409955	772230	301919	276264	285917	303314	401321	741691	289752	241805
P14735	IDE	Insulin-degrading enzyme	11	304922	348220	235864	306679	265931	246336	340004	234279	258206	235332	374694	303593	333901	301756	309647	300668	343764	333539
O75874	IDH1	Isocitrate dehydrogenase [NADP] cytoplasmic	20	624446	789709	948670	717000	999088	919682	668099	795200	788391	905839	684069	699213	603373	669064	754273	909665	740254	820550
P48735	IDH2	Isocitrate dehydrogenase [NADP], mitochondrial	25	1.49943e+06	489575	1.70248e+06	973983	1.9231e+06	1.84744e+06	888181	1.82136e+06	1.47891e+06	1.82136e+06	704377	1.06828e+06	1.00658e+06	1.16753e+06	1.30255e+06	1.8126e+06	568056	767947
P50213	IDH3A	Isocitrate dehydrogenase [NAD] subunit alpha, mitochondrial	10	390125	152226	428004	269245	468526	449381	228152	424156	355213	453801	194894	243793	218986	266186	354881	436793	168250	219800
Q13907-2	IDI1	Isoform 2 of Isopentenyl-diphosphate Delta-isomerase 1	1	388721	360864	400260	355213	382814	365683	306492	378716	363043	407665	386250	415274	398541	457451	364203	340027	405464	503897
Q9Y5U9	IER3IP1	Immediate early response 3-interacting protein 1	2	105099	56177	231634	130608	189268	220612	88258.4	115557	153690	183414	48571.8	75038	84484.1	56177	142781	145951	80623.2	83339.7
P80217-2	IFI35	Isoform 2 of Interferon-induced 35 kDa protein	5	157073	232780	235666	215047	243780	241014	234845	255497	254521	406032	269143	192779	179519	195427	223158	249243	193653	249784
P78318	IGBP1	Immunoglobulin-binding protein 1	7	517180	636473	975381	562580	760594	988482	584686	891515	647337	857935	604488	624215	506744	604488	552400	993966	600849	598267
Q9Y6M1	IGF2BP2	Insulin-like growth factor 2 mRNA-binding protein 2	12	304395	302377	366128	357586	390364	333049	328575	394627	333495	374814	312607	309576	309576	316049	328803	408510	309807	318011
P35858-2	IGFALS	Isoform 2 of Insulin-like growth factor-binding protein complex acid labile subunit	14	731500	706153	337166	565341	348330	354655	779119	352751	615105	333633	827226	670428	798488	685395	796699	376748	827226	742399
P18065	IGFBP2	Insulin-like growth factor-binding protein 2	2	124496	142949	112679	143373	150586	144599	135626	182681	149108	188448	129515	136935	184331	140270	111025	158367	154251	149998
P17936-2	IGFBP3	Isoform 2 of Insulin-like growth factor-binding protein 3	6	241462	242195	93335	199581	108306	120755	235177	94973	184178	101224	251788	245707	255356	217916	218358	98267.8	259399	259182
P24593	IGFBP5	Insulin-like growth factor-binding protein 5	1	93798.1	91632.8	80381.2	100349	83457.3	85929.2	91873.4	87707	90828	111309	81910.8	76554.4	122540	78186.3	93520.6	79748.4	85642	91033.2
P01876	IGHA1	Immunoglobulin heavy constant alpha 1	13	2.56608e+06	4.23456e+06	498641	2.24947e+06	492873	509860	2.32504e+06	456966	1.80466e+06	506294	3.89341e+06	2.83352e+06	2.40568e+06	2.43372e+06	2.78445e+06	545413	2.35363e+06	2.03419e+06
P01859	IGHG2	Immunoglobulin heavy constant gamma 2	14	1.1463e+07	7.51771e+06	1.68343e+06	8.46451e+06	1.34421e+06	1.34254e+06	7.42541e+06	1.19657e+06	8.16125e+06	1.64582e+06	8.41938e+06	7.60115e+06	6.9562e+06	4.25863e+06	8.46451e+06	1.45607e+06	7.51771e+06	5.62847e+06
P01860	IGHG3	Immunoglobulin heavy constant gamma 3	14	3.34345e+06	2.06421e+06	480213	1.60975e+06	384149	312905	2.10835e+06	477165	1.2972e+06	385566	1.94652e+06	2.3731e+06	2.01439e+06	1.14687e+06	2.30297e+06	480213	2.08112e+06	1.49914e+06
P01861	IGHG4	Immunoglobulin heavy constant gamma 4	12	1.00561e+06	954019	1.08337e+06	1.08337e+06	1.22566e+06	1.03898e+06	866973	1.23931e+06	955871	1.25509e+06	915299	2.1311e+06	1.18163e+06	923497	2.87166e+06	975381	784071	700844
P23083	IGHV1-2	Immunoglobulin heavy variable 1-2	3	239519	290924	43397.7	316462	40825.6	49235.2	240545	34440.8	254921	41400.7	248951	237964	254493	225970	224879	53230.5	224344	301591
A0A0C4DH29	IGHV1-3	Immunoglobulin heavy variable 1-3	3	140123	115904	14683.6	133684	11960.1	13057	110058	14683.6	64430.9	14088.1	126617	81943.3	152553	112611	94605.3	20890	113474	102653
A0A0A0MS14	IGHV1-45	Immunoglobulin heavy variable 1-45	1	467575	326721	27657	203053	26395.6	37268.9	457631	18694.5	336274	19878.8	410294	255764	428740	236212	294796	22783.2	346773	320727
P01743	IGHV1-46	Immunoglobulin heavy variable 1-46	3	282989	235063	31242	171072	23561.9	21594.2	247672	30782.6	142544	32296.5	240799	190485	225317	214524	183414	24261.1	263628	216575
P01742	IGHV1-69	Immunoglobulin heavy variable 1-69	3	1.86989e+06	1.8618e+06	280835	1.30255e+06	207244	274639	1.3894e+06	215864	1.20858e+06	238138	1.90697e+06	1.87762e+06	2.00254e+06	1.58496e+06	1.2607e+06	310892	1.3721e+06	1.12566e+06
P01766	IGHV3-13	Immunoglobulin heavy variable 3-13	2	425923	378065	71996.8	334707	68686.1	68599.5	343460	59520.1	243881	68504.6	563224	240069	500294	273175	221177	87707	392857	104821
A0A0B4J1V0	IGHV3-15	Immunoglobulin heavy variable 3-15	2	259990	228691	27081.5	252228	24839.7	24157.9	157754	20081.9	137260	21276.2	243671	149823	251046	115721	226182	26696.9	157560	174986
P0DP03	IGHV3-30-5	Immunoglobulin heavy variable 3-30-5	3	1.47791e+06	1.42389e+06	189987	1.10317e+06	222152	218358	1.2313e+06	217280	803782	220074	2.26338e+06	1.39585e+06	1.76692e+06	1.06412e+06	910937	186901	1.41647e+06	1.23258e+06
A0A0B4J1X8	IGHV3-43	Immunoglobulin heavy variable 3-43	2	146975	135982	14170.1	116324	14443.4	16929.2	100957	14443.4	98267.8	17097.2	139115	112206	117935	76733.2	122839	21690.6	105144	108058
A0A0A0MS15	IGHV3-49	Immunoglobulin heavy variable 3-49	2	950966	721684	113243	526667	88094.5	104052	252023	83355.2	478146	89548.6	722377	264443	790128	274738	807139	120650	558744	440580
A0A0J9YX35	IGHV3-64D	Immunoglobulin heavy variable 3-64D	2	555864	449774	117975	305647	88280.8	93125.4	431630	98147.4	388411	110538	507637	374521	430651	333480	766307	103760	516881	299783
P01780	IGHV3-7	Immunoglobulin heavy variable 3-7	4	1.55102e+06	887231	267843	1.39704e+06	259032	273700	808222	260229	905985	285872	1.12674e+06	838125	1.22914e+06	456511	1.01828e+06	310202	808222	811415
A0A0B4J1Y9	IGHV3-72	Immunoglobulin heavy variable 3-72	3	800635	476513	203887	477741	208808	201655	411918	194017	443178	178587	481088	341484	505707	295616	518304	232820	565802	322946
A0A0B4J1X5	IGHV3-74	Immunoglobulin heavy variable 3-74	3	2.61236e+06	1.68506e+06	2.35711e+06	1.78378e+06	1.87349e+06	2.46712e+06	1.57932e+06	1.56045e+06	1.65494e+06	1.89548e+06	1.70697e+06	1.12449e+06	1.66313e+06	1.30322e+06	1.38421e+06	1.60975e+06	1.55423e+06	1.76372e+06
P01782	IGHV3-9	Immunoglobulin heavy variable 3-9	3	814344	818499	180783	725453	185117	168456	721868	155212	463124	170137	866366	705282	905453	611929	619436	212243	969902	719866
A0A0C4DH34	IGHV4-28	Immunoglobulin heavy variable 4-28	1	1.14319e+06	1.16415e+06	115703	1.10092e+06	129411	132364	951961	147384	705024	158832	1.05207e+06	834847	1.14847e+06	901725	563216	145106	950445	822082
A0A087WSY4	IGHV4-30-2	Immunoglobulin heavy variable 4-30-2	2	242766	199440	58303.1	203604	53331.7	52804.5	163240	61793.4	157284	54688	195064	225994	221784	216763	178172	62138.7	175170	142012
A0A075B6R2	IGHV4-4	Immunoglobulin heavy variable 4-4	2	450807	582390	124677	588745	122303	133439	514192	121970	520425	141192	445210	626063	557081	443938	257003	130927	406547	371560
A0A0J9YXX1	IGHV5-10-1	Immunoglobulin heavy variable 5-10-1	3	1.37259e+06	2.81411e+06	823078	1.59557e+06	1.0183e+06	954293	1.29459e+06	1.67544e+06	1.76725e+06	1.3885e+06	1.28587e+06	3.69596e+06	1.26933e+06	1.9801e+06	1.53162e+06	1.26766e+06	2.37685e+06	1.19169e+06
A0A0C4DH38	IGHV5-51	Immunoglobulin heavy variable 5-51	5	1.10433e+06	963967	184565	983710	162551	179028	762479	174900	801766	187236	1.14056e+06	994937	1.18726e+06	828045	958532	175445	1.06445e+06	748317
A0A0B4J1U7	IGHV6-1	Immunoglobulin heavy variable 6-1	2	717704	1.40076e+06	318985	985902	295810	282158	702312	272319	547292	295615	861984	627731	818992	772953	458709	292744	597322	578028
P01834	IGKC	Immunoglobulin kappa constant	5	2.31583e+06	1.96215e+06	368206	1.76144e+06	341280	316288	1.53934e+06	303019	1.3885e+06	353867	1.79267e+06	1.78836e+06	1.66653e+06	1.26433e+06	2.05672e+06	504897	1.53391e+06	1.3964e+06
A0A0A0MT89	IGKJ1	Immunoglobulin kappa joining 1	1	512144	322251	224863	535503	277940	236818	270262	356492	362556	348536	468419	437228	418147	151419	453218	286215	361587	329134
P01599	IGKV1-17	Immunoglobulin kappa variable 1-17	2	1.15754e+06	596074	205877	425654	225726	184345	711778	326334	286471	188329	726717	671180	831705	743075	346267	220947	748062	889254
A0A0C4DH72	IGKV1-6	Immunoglobulin kappa variable 1-6	2	226898	193226	50361.7	129117	62881.8	44408.9	144226	61511.2	140521	54431.5	192818	125314	155530	145078	189566	72407.8	187747	148111
P01593	IGKV1D-33	Immunoglobulin kappa variable 1D-33	1	990449	1.23021e+06	386354	820488	381165	398594	734244	525831	691049	354107	1.07431e+06	764782	892422	964668	802971	486150	1.33136e+06	1.64378e+06
A0A0C4DH68	IGKV2-24	Immunoglobulin kappa variable 2-24	1	1.18729e+06	622448	149356	365683	109670	142288	719468	132364	624912	111511	695881	541272	478322	418203	407136	145400	508673	518870
A0A087WW87	IGKV2-40	Immunoglobulin kappa variable 2-40	2	1.36714e+06	1.11888e+06	128431	1.32809e+06	110816	137880	941187	107130	845826	159855	1.08075e+06	1.04079e+06	979764	1.12882e+06	1.07086e+06	138007	1.02334e+06	1.16161e+06
A0A075B6S2	IGKV2D-29	Immunoglobulin kappa variable 2D-29	2	271936	216476	136761	262480	155831	106193	186106	380307	182384	207475	220896	202757	240842	155783	226990	212756	269616	191885
P01619	IGKV3-20	Immunoglobulin kappa variable 3-20	3	835319	789429	278016	813986	273035	310583	760318	285130	608333	283711	722722	778464	798149	611676	851226	319573	686100	647750
A0A0A0MRZ8	IGKV3D-11	Immunoglobulin kappa variable 3D-11	2	292835	276104	72088	236103	75257	66118.4	238826	65229.6	192233	72640.5	287458	277159	304243	217557	295411	74420.4	263233	212802
A0A087WSY6	IGKV3D-15	Immunoglobulin kappa variable 3D-15	2	2.13506e+06	1.18988e+06	237701	775225	344995	285968	1.12674e+06	379446	847285	313348	1.30807e+06	1.11611e+06	1.36001e+06	743166	770695	315448	1.07521e+06	1.01684e+06
A0A0C4DH25	IGKV3D-20	Immunoglobulin kappa variable 3D-20	3	777965	744767	209497	599787	181156	212561	677873	195747	496988	182150	716526	771424	721902	693535	610660	233273	668726	622675
P06312	IGKV4-1	Immunoglobulin kappa variable 4-1	3	1.26452e+06	913354	215237	1.01517e+06	145723	219770	848954	198726	750718	176553	1.25813e+06	793771	1.21073e+06	1.00782e+06	823078	241688	937158	978342
P0DOY2	IGLC2	Immunoglobulin lambda constant 2	5	1.87991e+06	1.71408e+06	146708	1.6895e+06	135382	112560	1.48909e+06	106682	1.16864e+06	131719	1.89642e+06	1.62251e+06	1.27873e+06	893122	1.37573e+06	125943	1.38427e+06	1.18377e+06
A0M8Q6	IGLC7	Immunoglobulin lambda constant 7	5	3.10075e+06	3.40541e+06	253869	2.71306e+06	219651	263231	2.46922e+06	226273	1.77749e+06	206684	2.82246e+06	2.26642e+06	2.93626e+06	2.035e+06	2.4238e+06	267201	2.2867e+06	2.2427e+06
P15814	IGLL1	Immunoglobulin lambda-like polypeptide 1	2	343432	294658	167505	260712	165764	166211	311836	161045	217007	158089	326600	323858	320326	312611	229982	177952	308568	304928
P01703	IGLV1-40	Immunoglobulin lambda variable 1-40	1	375220	317473	261794	465261	307240	278781	357733	401864	349332	409287	394431	307024	403718	291903	463209	227659	323291	356612
P01700	IGLV1-47	Immunoglobulin lambda variable 1-47	2	353539	336628	112560	321357	111025	109917	269886	100780	186021	121107	314864	225955	318718	228290	260024	106146	319218	201515
P01701	IGLV1-51	Immunoglobulin lambda variable 1-51	2	625644	516722	121242	358756	136548	143677	226105	143789	483595	138206	625644	338621	463461	205911	445920	146179	412955	443595
P01706	IGLV2-11	Immunoglobulin lambda variable 2-11	2	419946	495378	202921	421579	212913	178827	741340	250111	766307	246518	1.10463e+06	204109	394500	685383	365303	208240	431890	414124
P01704	IGLV2-14	Immunoglobulin lambda variable 2-14	1	194629	181523	46533.2	447560	35195.7	33229.3	106791	34989.8	49819.2	38420.9	140711	169213	163518	90436.5	404952	41966.6	142372	192306
P01705	IGLV2-23	Immunoglobulin lambda variable 2-23	1	1.45416e+06	1.20082e+06	406032	1.11535e+06	520690	447560	1.1728e+06	508296	429606	466801	1.68055e+06	558160	1.87138e+06	957837	1.88082e+06	423750	1.45585e+06	1.32377e+06
P01709	IGLV2-8	Immunoglobulin lambda variable 2-8	2	1.28218e+06	1.06226e+06	182839	1.56376e+06	239359	204883	824217	225828	1.02189e+06	295085	1.19378e+06	884746	1.03959e+06	658845	893317	238777	1.11301e+06	1.00367e+06
P01714	IGLV3-19	Immunoglobulin lambda variable 3-19	1	2.96379e+06	2.44186e+06	825927	2.28075e+06	933851	773139	2.99244e+06	1.15203e+06	2.30297e+06	907753	4.25288e+06	2.39442e+06	2.75781e+06	2.36347e+06	1.51481e+06	1.02709e+06	2.96379e+06	2.67584e+06
P80748	IGLV3-21	Immunoglobulin lambda variable 3-21	1	2.36754e+06	1.50567e+06	1.66475e+06	2.02129e+06	1.79976e+06	1.56045e+06	1.6535e+06	1.29101e+06	1.79976e+06	1.52808e+06	2.00019e+06	2.02935e+06	2.15859e+06	1.1966e+06	1.79976e+06	1.30838e+06	1.42823e+06	1.65879e+06
P01718	IGLV3-27	Immunoglobulin lambda variable 3-27	2	201057	297593	49696.5	424156	46928.9	40320.6	255369	36208.6	151274	38760.7	210087	354534	326454	248832	161800	55089.1	511051	257330
A0A075B6H9	IGLV4-69	Immunoglobulin lambda variable 4-69	2	1.86725e+06	530800	224348	1.29561e+06	253138	218206	1.28842e+06	316150	1.16436e+06	270090	1.63612e+06	743166	1.48336e+06	490629	856079	265156	1.96013e+06	727718
A0A075B6I9	IGLV7-46	Immunoglobulin lambda variable 7-46	2	781492	578004	308692	1.15898e+06	335132	347457	601272	310703	563797	317443	763384	626920	814514	484404	655520	318774	771171	574943
A0A075B6I0	IGLV8-61	Immunoglobulin lambda variable 8-61	1	898254	845188	229982	213444	285947	198330	869224	285032	217688	249793	950612	415956	510902	490418	566695	262992	471909	591211
A0A0B4J1Y8	IGLV9-49	Immunoglobulin lambda variable 9-49	3	1.61387e+06	605381	279591	1.03299e+06	249935	239790	998586	256596	897986	308350	1.55102e+06	937127	1.09003e+06	591891	939873	252815	1.11611e+06	783876
O14920	IKBKB	Inhibitor of nuclear factor kappa-B kinase subunit beta	8	1.40193e+06	1.55379e+06	349132	969962	278781	290701	1.46678e+06	343477	1.08337e+06	310703	1.48062e+06	1.52359e+06	1.47232e+06	1.80724e+06	1.26313e+06	259462	1.61615e+06	1.52359e+06
Q9Y6K9-2	IKBKG	Isoform 2 of NF-kappa-B essential modulator	8	137690	155330	159421	125140	203604	164973	137690	183217	154569	182250	141920	109525	128313	135072	149622	128309	133270	139333
Q14116	IL18	Interleukin-18	4	100665	83961.7	116390	97956	135565	85462.8	97881.8	114199	100546	92916.7	105648	93605.9	103663	100665	90701.5	171072	79556.7	112473
Q9NPH3-5	IL1RAP	Isoform 4 of Interleukin-1 receptor accessory protein	1	141350	158746	140284	126784	142171	137381	177713	159570	140957	162571	175902	197711	212240	186366	177072	132103	173859	176464
Q13418	ILK	Integrin-linked protein kinase	21	3.56645e+06	4.13413e+06	6.35198e+06	4.02268e+06	7.17461e+06	6.06176e+06	3.92413e+06	6.20357e+06	4.74186e+06	6.50801e+06	3.20747e+06	3.80897e+06	3.51288e+06	3.83666e+06	4.28968e+06	5.15052e+06	4.57982e+06	3.49398e+06
P29218-3	IMPA1	Isoform 3 of Inositol monophosphatase 1	10	176622	186610	217604	203096	215173	206424	179663	210038	204892	242435	178284	164264	178486	171570	212080	226943	178284	176854
P12268	IMPDH2	Inosine-5'-monophosphate dehydrogenase 2	6	445535	454236	267302	409287	325307	397459	440174	353867	382318	250515	574924	496453	522024	612071	427205	331168	469806	530018
Q9GZP8	IMUP	Immortalization up-regulated protein	1	145872	150880	87530.7	70131.6	70010.8	62716.3	112853	93960.7	68088.2	73835.1	98470.1	129380	134291	122707	86131.2	119522	148444	186932
Q27J81	INF2	Inverted formin-2	36	1.19833e+06	1.48352e+06	1.3885e+06	1.34421e+06	1.41307e+06	1.51972e+06	1.50606e+06	1.49361e+06	1.43675e+06	1.33626e+06	1.45311e+06	1.72672e+06	1.37022e+06	1.37022e+06	1.28737e+06	1.40318e+06	1.5658e+06	1.43466e+06
O15327	INPP4B	Type II inositol 3,4-bisphosphate 4-phosphatase	19	268479	312164	357238	292392	388694	346267	295215	398268	303859	360068	298315	293642	273460	283744	314448	366128	320011	332664
Q14642	INPP5A	Type I inositol 1,4,5-trisphosphate 5-phosphatase	10	454029	294812	333825	308286	322576	334267	386001	349332	292880	500445	246656	372142	309048	327954	227343	271110	236769	361890
P32019	INPP5B	Type II inositol 1,4,5-trisphosphate 5-phosphatase	15	276054	331796	342760	326797	342760	347925	313036	341280	345883	332404	357062	302815	307375	295924	306909	307065	302107	299065
Q92835	INPP5D	Phosphatidylinositol 3,4,5-trisphosphate 5-phosphatase 1	17	330325	366869	377662	405400	410044	373408	387010	409819	376370	363097	380252	359214	424660	346462	419737	374097	376122	350464
O15357	INPPL1	Phosphatidylinositol 3,4,5-trisphosphate 5-phosphatase 2	22	549868	566946	636110	596212	660012	638324	644544	609142	612201	640050	554838	565861	544155	591119	596967	577675	552045	608861
Q9UI26-2	IPO11	Isoform 2 of Importin-11	2	164925	130469	110473	137102	133733	113651	168169	160603	139332	124488	134768	123757	143475	129529	140760	118783	129059	137459
O00410-3	IPO5	Isoform 3 of Importin-5	21	439167	569944	554290	435677	478610	554290	527164	1.17974e+06	417796	556752	520436	575010	478301	503118	629730	1.09636e+06	515994	543025
O95373	IPO7	Importin-7	19	383955	408108	609142	370810	538689	499053	421125	511692	424156	656185	379864	379864	357798	391605	438344	500115	391605	369783
Q96P70	IPO9	Importin-9	14	822159	899089	805539	914891	890374	740665	859370	779555	715073	864043	834227	839306	816732	748205	778826	788391	881871	750338
P46940	IQGAP1	Ras GTPase-activating-like protein IQGAP1	26	376773	389738	320837	306117	308547	391539	288741	425405	310703	303537	306258	476505	328216	400199	344625	305821	302376	264606
Q13576	IQGAP2	Ras GTPase-activating-like protein IQGAP2	67	2.25519e+06	2.5373e+06	3.36084e+06	2.55371e+06	3.72083e+06	3.24457e+06	2.3842e+06	3.4729e+06	2.76314e+06	3.63366e+06	2.35228e+06	2.97022e+06	2.08563e+06	3.00856e+06	2.64925e+06	2.6308e+06	2.58184e+06	2.25519e+06
Q9NWZ3	IRAK4	Interleukin-1 receptor-associated kinase 4	15	379465	499025	288502	386671	315765	294588	473342	265133	394627	314222	591526	481350	473342	439528	356156	285617	513863	480681
Q8WZA9	IRGQ	Immunity-related GTPase family Q protein	3	144221	167566	118671	121174	99715.4	97206.5	136917	102925	113487	111838	149838	155376	138540	120072	135844	103176	161751	153740
Q9Y4H2	IRS2	Insulin receptor substrate 2	5	67782.9	76050.3	74428.3	74545.8	80921.8	71442.5	68463	86575.6	69535.8	78825.4	66434	64243	65735.6	58142.1	69618.3	96718	76252	74905.1
P05161	ISG15	Ubiquitin-like protein ISG15	1	210811	256715	309920	214335	222289	252629	190702	172162	218249	239198	285954	208538	220395	257550	206770	287512	179704	230454
Q96CN7	ISOC1	Isochorismatase domain-containing protein 1	9	449473	490354	641820	438344	649143	602256	459287	654746	580691	616715	522512	475813	499437	463804	556752	671803	528379	541121
P53990-5	IST1	Isoform 5 of IST1 homolog	9	167316	185340	374224	289644	412951	338876	184573	372599	323098	404277	172454	177507	181358	176645	317443	376452	189967	166323
Q9NPH2	ISYNA1	Inositol-3-phosphate synthase 1	6	312704	376336	325966	322066	371747	308405	278168	363043	287654	309647	387508	408588	321764	410921	310363	360654	409550	419818
P17301	ITGA2	Integrin alpha-2	25	887936	592983	1.19657e+06	720336	1.05962e+06	1.47183e+06	724388	1.1418e+06	976622	1.51481e+06	768266	596706	788354	759007	721486	897404	665075	536861
P08514	ITGA2B	Integrin alpha-IIb	38	4.82887e+06	1.71074e+06	1.11022e+07	2.87166e+06	6.99632e+06	5.98641e+06	2.48901e+06	6.74418e+06	3.88795e+06	7.89707e+06	2.05795e+06	2.38662e+06	2.48901e+06	3.39792e+06	3.17206e+06	5.98641e+06	2.33342e+06	2.67617e+06
P23229-6	ITGA6	Isoform Alpha-6X1X2A of Integrin alpha-6	37	1.39695e+06	1.0859e+06	1.87349e+06	1.24188e+06	1.57832e+06	1.545e+06	1.17352e+06	1.79976e+06	1.32809e+06	1.70821e+06	1.01261e+06	1.19496e+06	1.15347e+06	1.0922e+06	1.25852e+06	1.60387e+06	983573	1.26307e+06
P05556	ITGB1	Integrin beta-1	25	894316	606727	1.10092e+06	717732	968072	1.13553e+06	662810	1.01687e+06	819728	1.07471e+06	569354	670012	694637	607221	720336	960165	579318	769748
Q9UKP3	ITGB1BP2	Integrin beta-1-binding protein 2	3	139336	194425	183518	145951	169332	171447	173315	154248	138007	171155	151246	121262	173937	151582	148492	211167	141571	154542
P05106	ITGB3	Integrin beta-3	33	5.54384e+06	1.88984e+06	7.89707e+06	2.79994e+06	4.56781e+06	3.55433e+06	2.53923e+06	5.31154e+06	3.96204e+06	6.35198e+06	2.10464e+06	2.69239e+06	2.70043e+06	2.51233e+06	3.36084e+06	4.74186e+06	1.96763e+06	3.25461e+06
P18084	ITGB5	Integrin beta-5	9	236458	141056	271552	206493	283911	331559	156432	313761	209081	304819	190219	158480	195016	178886	206067	250282	170978	178757
P19827	ITIH1	Inter-alpha-trypsin inhibitor heavy chain H1	14	1.13553e+06	1.13553e+06	202156	935726	201815	207323	1.17872e+06	216487	737170	192233	1.06422e+06	918999	1.25663e+06	1.03111e+06	739480	259043	1.12088e+06	937003
P19823	ITIH2	Inter-alpha-trypsin inhibitor heavy chain H2	22	1.83502e+06	1.91587e+06	604954	1.83973e+06	577805	718996	2.04912e+06	588452	1.57159e+06	562010	1.86725e+06	1.55102e+06	2.27741e+06	1.91587e+06	1.59527e+06	679070	1.83502e+06	1.63612e+06
Q06033	ITIH3	Inter-alpha-trypsin inhibitor heavy chain H3	10	715706	595146	267534	682344	223072	267302	525036	247558	509153	265832	708130	573540	804037	622042	487776	316462	646288	609912
Q14624	ITIH4	Inter-alpha-trypsin inhibitor heavy chain H4	27	4.40628e+06	4.12435e+06	1.17502e+06	4.23191e+06	1.05561e+06	1.19066e+06	4.3552e+06	1.37573e+06	3.4729e+06	1.14988e+06	4.74186e+06	4.00199e+06	5.1669e+06	5.04051e+06	4.56781e+06	1.41307e+06	4.30048e+06	3.46697e+06
P27987	ITPKB	Inositol-trisphosphate 3-kinase B	5	142736	187026	116324	168216	149198	123527	150618	145723	163053	171810	140600	132858	139845	160953	127704	141116	165714	158089
Q14643	ITPR1	Inositol 1,4,5-trisphosphate receptor type 1	41	710075	398000	749674	567506	646599	650332	650879	781306	586598	756680	393805	559365	500753	471320	594754	543425	521214	435083
P28290	ITPRID2	Protein ITPRID2	6	160044	171978	186021	177184	196999	199755	155599	214412	171072	232820	155786	163082	165101	183542	164114	185920	159559	175826
Q15811	ITSN1	Intersectin-1	4	32984.1	41860.5	39748.4	48306.8	33084	29797.2	34327.3	35998.4	38106.3	33996.5	41263.1	35471.4	42707.8	36008.8	36651.5	32107.6	29079	43500.5
Q9NZM3	ITSN2	Intersectin-2	19	312551	269703	331419	284741	332648	322963	329035	325966	287556	324602	309122	313390	318176	361341	295085	364691	326769	332259
P26440	IVD	Isovaleryl-CoA dehydrogenase, mitochondrial	10	604082	165677	661873	356423	720336	616715	261126	668444	534696	660012	260214	338938	400684	372416	476675	693410	167435	266702
O60674	JAK2	Tyrosine-protein kinase JAK2	7	91928.6	81742.4	102593	76479.4	113736	94465.1	86924.3	83971.2	82668.4	97846.4	70658.3	70563.3	79203.7	75119	86581.1	79407	78942.7	78942.7
P52333	JAK3	Tyrosine-protein kinase JAK3	14	593334	599649	600165	688202	599787	530033	571996	555955	649738	623071	507119	651139	571457	537637	586319	582913	671206	514162
Q9BX67	JAM3	Junctional adhesion molecule C	8	196463	124084	245541	152058	266204	198445	160864	215552	175362	231134	129217	149890	151883	122571	153998	197486	140698	134148
P01591	JCHAIN	Immunoglobulin J chain	4	4.80132e+06	5.50718e+06	583710	6.74418e+06	629730	729243	4.93725e+06	883762	3.63366e+06	619713	1.066e+07	4.39506e+06	6.52422e+06	4.36037e+06	4.82902e+06	944489	5.71043e+06	4.65271e+06
Q9UK76-2	JPT1	Isoform 2 of Jupiter microtubule associated homolog 1	1	34666.9	51228.7	34263.2	43889.2	31961.5	42873.3	35004.9	44803	50215	44954	36704	38917.3	41932.7	36704	25927.2	49176.9	48200.7	45952.4
Q9H910-3	JPT2	Isoform 3 of Jupiter microtubule associated homolog 2	5	145710	177895	183129	170278	187236	224879	141517	111124	180647	125757	172828	144660	170941	156599	159684	117388	194495	194495
P14923	JUP	Junction plakoglobin	2	136747	102028	62248.6	70714.7	51102.7	46429	107629	43104.3	62248.6	71996.8	160501	96071.6	116392	172116	98371.9	46255	187093	92029.5
Q15046-2	KARS	Isoform Mitochondrial of Lysine--tRNA ligase	11	386695	389463	412134	371565	496988	454547	354456	485194	380339	447972	418881	408291	352215	364112	392805	504525	325019	403200
Q9BW62	KATNAL1	Katanin p60 ATPase-containing subunit A-like 1	6	217942	325281	188580	257511	206770	182839	330524	186468	206205	179028	327390	308850	254841	262199	199678	244421	311403	312028
Q9P0J7	KCMF1	E3 ubiquitin-protein ligase KCMF1	1	94219.3	126059	176300	70483.9	152323	137191	114503	134591	127448	138029	116755	121265	90998.6	99902.2	149860	143442	114899	117497
Q13303-5	KCNAB2	Isoform 5 of Voltage-gated potassium channel subunit beta-2	7	251580	215879	259043	244421	306117	266204	225559	292392	260309	284841	227417	218656	226118	225559	256796	276274	218656	219616
Q9Y257	KCNK6	Potassium channel subfamily K member 6	1	246732	183347	500115	204476	405216	353263	179049	737170	267731	425405	200622	188103	216269	193680	242648	573007	159233	202332
Q9H3F6	KCTD10	BTB/POZ domain-containing adapter for CUL3-mediated RhoA degradation protein 3	2	128368	136300	162938	147384	157284	140356	128460	214489	157080	151381	150413	140276	130428	131483	152299	170886	131401	153736
Q92945	KHSRP	Far upstream element-binding protein 2	4	64764.5	51831.1	48728.4	51416.7	57159.7	65229.6	50325.7	67684.9	60273.3	50361.7	53066.2	65704.6	47378.2	64273.8	71764.5	51656.9	49912.9	48700.9
Q14667	KIAA0100	Protein KIAA0100	1	161794	81227.6	74481.7	104806	75927.4	67461.2	154039	86131.2	87320.3	82338.7	172774	65742.3	108993	120672	96386.3	109569	99171.5	96698.4
O60268	KIAA0513	Uncharacterized protein KIAA0513	13	524096	625950	632901	548482	658849	577675	545434	571618	643363	599134	617206	621316	511832	480560	538689	622026	621316	624173
Q6ZU35	KIAA1211	Uncharacterized protein KIAA1211	12	135729	162442	156052	145543	172864	159523	143181	146708	129796	162443	128067	127003	147299	126490	130768	186700	137328	119189
Q9NQT8	KIF13B	Kinesin-like protein KIF13B	18	350380	371442	512797	360654	481279	515818	393135	667553	391539	478146	393533	368941	430407	392382	389584	535582	377882	388774
Q96EK5	KIF1BP	KIF1-binding protein	1	45584.3	50601.4	43317	41835.8	37727.5	39142.8	46109.4	45441.6	37574.9	43464.5	50530.1	48251.7	37003.5	44500.3	59210.9	42384.4	52883.1	55266.1
P33176	KIF5B	Kinesin-1 heavy chain	37	707948	798997	785660	727908	809593	750718	802938	755183	733614	768661	784837	784837	718262	768556	737170	749674	874099	927718
Q07866-9	KLC1	Isoform I of Kinesin light chain 1	21	411553	477521	561228	472155	526667	526063	475871	472768	497367	546010	486521	478571	446605	457257	460473	443697	506690	525346
Q9NSK0-3	KLC4	Isoform 3 of Kinesin light chain 4	7	63895.3	72611.8	109917	91819.2	106446	104107	628143	109429	96623.6	114728	85409.1	74596.6	68709.8	80419.5	95612.3	100780	84839.3	81786.7
P03952	KLKB1	Plasma kallikrein	16	1.06003e+06	1.06297e+06	587243	1.00558e+06	357035	422372	1.22386e+06	327759	971093	384565	1.18456e+06	871188	1.66842e+06	1.06297e+06	905839	756680	1.12476e+06	861271
Q8IZD2-5	KMT2E	Isoform 5 of Inactive histone-lysine N-methyltransferase 2E	1	45494.9	26420.7	22436.6	38901.6	34086.7	35727.1	34745.2	37824.9	35464.9	43889.2	44486.1	31690.1	49095.3	40640.2	39142.8	33981.6	51418.3	46220.3
P52294	KPNA1	Importin subunit alpha-5	11	213247	241810	80154.2	188580	80819.8	76106.6	219388	85288.3	161800	86254	246245	226504	246245	250279	152828	85999	234462	216078
O00505	KPNA3	Importin subunit alpha-4	8	207898	238669	313544	226807	285213	303108	220778	310583	245081	303290	209065	190911	225120	214282	236103	302272	221419	222351
O00629	KPNA4	Importin subunit alpha-3	9	166347	189379	183835	162618	182839	167328	173347	182839	167378	179522	201521	168024	155007	192258	161226	185185	214154	186237
O60684	KPNA6	Importin subunit alpha-7	12	169038	182342	197986	191586	202431	187692	175923	204567	178334	210397	181696	171939	185864	169245	209767	200436	173836	170530
Q14974	KPNB1	Importin subunit beta-1	25	937924	1.11024e+06	1.0935e+06	1.02465e+06	1.04788e+06	1.05561e+06	1.07839e+06	1.00661e+06	1.1468e+06	1.03898e+06	1.16001e+06	1.05864e+06	1.15593e+06	1.00193e+06	1.0935e+06	1.03409e+06	1.09537e+06	976178
P04264	KRT1	Keratin, type II cytoskeletal 1	25	1.93356e+06	2.00579e+06	1.84316e+06	1.569e+06	1.25509e+06	1.35709e+06	1.66195e+06	1.45909e+06	1.38002e+06	1.6004e+06	2.43564e+06	1.68099e+06	1.64498e+06	1.98081e+06	2.66674e+06	1.62087e+06	2.35366e+06	1.49768e+06
P13645	KRT10	Keratin, type I cytoskeletal 10	21	999654	962555	819029	901884	578825	652811	767786	649738	718953	736317	1.21999e+06	813327	866739	1.32383e+06	1.06429e+06	690486	1.28012e+06	672428
P02533	KRT14	Keratin, type I cytoskeletal 14	8	162793	123766	96244.1	96244.1	101487	97305.8	106304	111268	90618.9	101197	169049	101169	127699	115528	98999.8	113192	129537	104191
P08779	KRT16	Keratin, type I cytoskeletal 16	8	1.00098e+06	364365	525831	343477	397078	479618	389312	443178	316135	471217	1.12995e+06	387226	396162	372069	410543	488243	363952	363322
Q04695	KRT17	Keratin, type I cytoskeletal 17	6	103389	59691.1	77073.8	55024.4	35727.1	42744.3	59194.4	32641.3	48978.4	35195.7	177225	45605.3	51743.6	73833.9	61210.5	43104.3	59476.5	57752.8
P35908	KRT2	Keratin, type II cytoskeletal 2 epidermal	25	1.04536e+06	914769	474738	817420	308405	355213	690223	333049	653802	366830	1.19004e+06	740842	907802	1.28404e+06	1.03827e+06	404277	1.2315e+06	669941
Q15323	KRT31	Keratin, type I cuticular Ha1	11	1.04672e+06	1.21246e+06	376748	908648	468986	390364	1.33972e+06	1.06829e+06	1.15203e+06	2.30297e+06	1.78005e+06	1.1101e+06	1.4192e+06	2.93827e+06	1.54052e+06	351807	2.47187e+06	1.44845e+06
Q14525	KRT33B	Keratin, type I cuticular Ha3-II	8	148025	179361	89309.9	116152	130486	90828	194935	166211	159079	320837	292479	178031	165320	488530	190950	88203.3	489471	211975
Q92764	KRT35	Keratin, type I cuticular Ha5	7	486261	511045	241688	251112	301558	222152	438610	728344	487395	1.39811e+06	767422	437281	542758	1.39462e+06	691718	340296	1.5148e+06	469286
O76013	KRT36	Keratin, type I cuticular Ha6	6	1.112e+06	1.09903e+06	174499	857935	209497	193197	1.22124e+06	429406	841934	1.05029e+06	1.5777e+06	1.03542e+06	1.66935e+06	2.80879e+06	1.10739e+06	136594	2.15615e+06	1.13937e+06
P13647	KRT5	Keratin, type II cytoskeletal 5	17	434119	353310	334905	341280	270804	267201	305767	239081	285617	314448	518912	286248	319372	361469	453801	282476	463546	257087
P04259	KRT6B	Keratin, type II cytoskeletal 6B	14	599548	343897	353867	264252	303108	331419	360978	307692	276518	300668	928478	331899	374436	363107	274089	311656	389900	357368
Q9NSB4	KRT82	Keratin, type II cuticular Hb2	4	331330	329033	98267.8	210130	141361	97125.4	342002	327501	281033	716628	546968	314167	419459	995822	497960	127973	776737	312817
P78386	KRT85	Keratin, type II cuticular Hb5	15	318341	324793	346572	230205	388998	333248	337363	496988	343477	782179	609132	311574	422061	1.1725e+06	564622	338041	1.03647e+06	422061
O43790	KRT86	Keratin, type II cuticular Hb6	16	555966	458531	341110	354107	414104	345698	571960	671803	605188	1.30948e+06	863003	456763	700203	1.40659e+06	888694	334905	1.24151e+06	608510
P35527	KRT9	Keratin, type I cytoskeletal 9	22	622831	633326	514218	511039	396306	412134	547342	408814	469551	481279	740512	568494	647962	614641	916085	502801	696670	474334
Q9BYR9	KRTAP2-4	Keratin-associated protein 2-4	1	30818.7	32871.2	3385.17	3878.9	6678.11	3878.9	21345.7	9860.42	18606.6	20426.9	56959.2	68062.3	59329.4	132369	45754.5	2179.89	205146	37479.5
Q8IVT5	KSR1	Kinase suppressor of Ras 1	12	207327	185794	222289	187236	224879	242190	214483	242406	216156	226273	218202	211661	199907	214377	207884	215721	208009	203773
Q86UP2	KTN1	Kinectin	26	454292	547800	542319	516490	603773	574433	574185	586598	496067	602256	528752	477007	522318	470100	508296	598580	539249	504408
Q6YP21	KYAT3	Kynurenine--oxoglutarate transaminase 3	3	1.05443e+06	794122	891822	808404	945591	862157	954684	869400	883626	717096	946206	814344	1.06715e+06	1.02328e+06	1.0082e+06	1.06205e+06	705282	745032
Q96EM0	L3HYPDH	Trans-3-hydroxy-L-proline dehydratase	1	338309	386025	178946	415079	191884	196372	359436	189025	347771	196999	379326	369586	349088	331521	364921	224304	429430	441797
P83111	LACTB	Serine beta-lactamase-like protein LACTB, mitochondrial	6	394485	784521	236484	654176	230948	222498	599544	196566	486900	254921	512666	661687	466517	294845	451446	203887	599544	732589
Q53H82	LACTB2	Endoribonuclease LACTB2	4	206887	279067	362053	244252	284121	296584	263552	343680	242534	298895	283887	234676	278159	261433	279158	350537	237320	222054
Q16363	LAMA4	Laminin subunit alpha-4	10	156520	167026	166847	155877	165030	211582	152010	205760	167003	167283	151433	147049	151857	153814	153923	229712	184471	189407
P07942	LAMB1	Laminin subunit beta-1	16	228520	225753	184464	203251	191009	224304	223907	236937	214412	200914	211404	196931	238034	246140	196839	239198	228845	234716
P11047	LAMC1	Laminin subunit gamma-1	13	193053	189400	171989	178946	177079	202814	184485	209602	185658	188901	168432	172482	180086	186978	172162	204476	218821	229997
P11279	LAMP1	Lysosome-associated membrane glycoprotein 1	6	199291	195134	462528	233847	460473	494325	271922	473951	298009	473463	226503	239601	254913	294454	291778	559070	235398	262031
P13473-3	LAMP2	Isoform LAMP-2C of Lysosome-associated membrane glycoprotein 2	3	302054	312108	530033	365303	617716	555210	370270	569190	417401	504897	325588	318837	379799	370791	374814	768661	299819	359928
O43813	LANCL1	Glutathione S-transferase LANCL1	5	969902	779371	889118	946815	986476	925301	911193	939889	961960	887557	894008	750493	940718	818499	849906	858123	774797	755924
Q9NS86	LANCL2	LanC-like protein 2	7	184009	199132	146876	183709	149002	148048	191475	154727	162336	147666	221285	200080	175986	192872	173772	151601	201478	221485
Q6ZV70	LANCL3	LanC-like protein 3	2	64430.5	61503.4	56466.2	103429	67461.2	39745.2	77040	37363.3	90701.5	41470	70341.5	60774	75987.8	81828	95095.9	45357.9	90509.2	89879.7
P28838	LAP3	Cytosol aminopeptidase	22	542361	653964	634817	555566	639425	619713	585153	560477	569778	633330	732598	620965	551889	572576	603773	668444	586991	666084
Q6PKG0	LARP1	La-related protein 1	6	172921	176129	181156	182957	202637	173988	198151	185571	186299	190177	181941	180422	164927	181711	222710	202637	203845	210682
Q9P2J5	LARS	Leucine--tRNA ligase, cytoplasmic	16	278715	301644	261891	267064	292057	279158	273070	278693	261021	276130	301852	308824	279278	261018	244421	258620	295241	284115
Q14847	LASP1	LIM and SH3 domain protein 1	16	405587	464936	437011	448115	414176	422763	404261	343522	445948	444543	426919	424660	412955	392533	425509	305593	439794	487339
O43561-3	LAT	Isoform 3 of Linker for activation of T-cells family member 1	2	44205.5	52456.5	86044.2	41468.3	92056.1	93542.1	42636.3	58401.7	61915.2	64969.5	46195.9	38988.7	39851.3	35702.1	51693.2	53842.3	38164.6	40511.3
P18428	LBP	Lipopolysaccharide-binding protein	5	836121	838656	985902	1.43326e+06	1.26766e+06	725504	816291	456152	789563	973983	783686	786110	1.13696e+06	886062	864043	462139	904362	543046
P04180	LCAT	Phosphatidylcholine-sterol acyltransferase	4	339662	301019	103624	315915	96167.6	107192	333421	112679	266925	98024.4	435453	257328	473073	328992	233593	128118	344649	312999
Q9UIC8-2	LCMT1	Isoform 2 of Leucine carboxyl methyltransferase 1	6	218732	154840	177007	164228	187316	169623	143052	169228	168449	164644	158159	150284	188710	154744	157080	213213	158806	170289
P80188	LCN2	Neutrophil gelatinase-associated lipocalin	6	249518	212970	186654	274639	170517	372331	206857	159523	201096	192553	260102	299043	221273	204734	231634	247156	197140	221079
P13796	LCP1	Plastin-2	25	1.48348e+06	1.52278e+06	1.23786e+06	1.08237e+06	1.27402e+06	2.1508e+06	1.21869e+06	2.39191e+06	1.29101e+06	1.29433e+06	1.36185e+06	2.04643e+06	1.24141e+06	1.64283e+06	1.51972e+06	1.6154e+06	1.16642e+06	1.26368e+06
Q13094	LCP2	Lymphocyte cytosolic protein 2	20	933532	1.072e+06	1.10966e+06	1.03105e+06	1.14402e+06	1.10966e+06	1.10404e+06	1.13553e+06	1.08237e+06	1.1468e+06	1.10016e+06	988707	964919	925966	1.07471e+06	1.24924e+06	1.05423e+06	1.2017e+06
Q9H6V9-2	LDAH	Isoform 2 of Lipid droplet-associated hydrolase	2	131829	124261	156354	91783.7	145543	153998	119527	127769	125061	158367	100515	140573	96906.1	124953	129411	117105	117391	95355.4
P00338-3	LDHA	Isoform 3 of L-lactate dehydrogenase A chain	20	1.76301e+06	2.08906e+06	2.64925e+06	2.53368e+06	2.08143e+06	2.61319e+06	2.22746e+06	2.46712e+06	2.46712e+06	2.51488e+06	1.89194e+06	2.30345e+06	1.6565e+06	2.28051e+06	1.84744e+06	1.9469e+06	2.19059e+06	1.86338e+06
P07195	LDHB	L-lactate dehydrogenase B chain	18	2.1472e+06	2.295e+06	3.22028e+06	2.43558e+06	3.63366e+06	3.32959e+06	2.04738e+06	3.13492e+06	2.78445e+06	3.32959e+06	2.05133e+06	2.18303e+06	2.04738e+06	2.24616e+06	2.4095e+06	3.02858e+06	2.10371e+06	2.06829e+06
Q5SW96	LDLRAP1	Low density lipoprotein receptor adapter protein 1	4	301949	353174	396518	383212	474950	330067	337829	513665	374525	499053	345258	324971	319639	307254	364691	447160	341519	309474
P09382	LGALS1	Galectin-1	5	229098	318865	173839	186123	159523	312681	182307	287971	196839	244112	232305	233915	246997	349428	283417	182511	200096	279365
Q96DT0-7	LGALS12	Isoform G of Galectin-12	1	219997	241076	264697	242999	272170	231243	255623	253321	247764	238531	246431	225984	216804	231864	237580	240381	252569	267485
P17931	LGALS3	Galectin-3	3	187847	175406	154326	178172	191423	205613	164097	196372	166847	176724	166688	188297	211818	225753	247917	214412	154011	167283
Q08380	LGALS3BP	Galectin-3-binding protein	10	248154	245432	120720	266925	139517	124136	259016	140356	235056	173430	321313	256630	314486	272356	216308	152828	302325	273892
Q3ZCW2	LGALSL	Galectin-related protein	8	608393	769764	815319	774761	1.05029e+06	790292	735091	935726	769915	925543	717592	747832	599890	639438	740157	1.08658e+06	733587	792190
Q99538	LGMN	Legumain	1	86793	169652	176797	118894	192690	159948	148143	136305	129612	168152	139923	167991	84460.6	131198	138966	115779	156399	198339
Q9H008	LHPP	Phospholysine phosphohistidine inorganic pyrophosphate phosphatase	3	221091	221718	149823	185571	146708	174115	181951	176910	192690	123995	219038	219038	182837	193802	238777	199872	220667	298414
Q9UHB6-4	LIMA1	Isoform 4 of LIM domain and actin-binding protein 1	6	137072	211224	177184	191213	211167	147186	221272	325511	164848	187580	180516	142393	156358	156662	161320	297207	233572	194554
Q9UGP4	LIMD1	LIM domain-containing protein 1	4	62879.3	73243.1	73902.2	78826.8	77200.1	68088.2	65503.5	75767.2	77643.3	68962.5	71446.5	65115.6	76410.3	59037.9	62248.6	70403.8	77528.7	87493.3
P48059-3	LIMS1	Isoform 3 of LIM and senescent cell antigen-like-containing domain protein 1	20	1.55912e+06	1.81391e+06	2.18312e+06	1.99915e+06	2.26224e+06	2.03788e+06	1.74827e+06	1.79421e+06	1.9469e+06	2.05672e+06	1.55436e+06	1.72233e+06	1.60301e+06	1.64219e+06	1.65929e+06	1.56045e+06	1.79759e+06	1.60717e+06
Q9NUP9	LIN7C	Protein lin-7 homolog C	2	114918	129719	137507	147741	212414	119068	120218	100873	106596	194435	110165	112820	103485	111065	91436.8	120825	119125	131579
P38571	LIPA	Lysosomal acid lipase/cholesteryl ester hydrolase	1	113825	103376	166045	104620	136993	120094	104676	237328	129146	144185	90349.8	83818.4	107176	135847	137080	206048	149553	136169
P49257	LMAN1	Protein ERGIC-53	8	166400	131044	206600	157766	174499	204169	185097	201466	163152	193938	141273	165923	171464	160583	166211	164848	154093	153770
Q12907	LMAN2	Vesicular integral-membrane protein VIP36	9	548340	307551	579934	404952	496067	605188	394797	524332	472768	566695	372178	372178	434365	419588	401864	496988	341361	352404
P02545	LMNA	Prelamin-A/C	17	399027	469663	322576	395295	363508	351233	428752	356156	376748	349132	426446	367375	392238	360856	375813	393229	427592	536559
Q9C0E8-4	LNPK	Isoform 4 of Endoplasmic reticulum junction formation protein lunapark	6	199829	74359.2	227468	128655	228785	194435	171507	209862	142861	210579	116672	123799	135750	100612	193197	188580	108347	129069
Q9BRX2	LO	Protein pelota homolog	2	45355.2	135635	86551.6	98759.2	90246.6	87062.6	185226	102286	101583	100616	89084.8	58521.5	100895	87547.4	102079	97725.7	103568	74121.2
P58215	LOXL3	Lysyl oxidase homolog 3	11	158799	170236	96512.8	163152	123598	123299	155416	169103	164228	140101	151929	151766	153291	164384	127434	132683	149686	169593
P08519	LPA	Apolipoprotein(a)	4	438498	517114	204567	321568	67333.6	66944	309986	76733.3	189091	92260.4	309630	420416	295584	564041	183994	93717.1	608832	229147
Q6P1A2	LPCAT3	Lysophospholipid acyltransferase 5	4	251702	139983	372599	202156	349534	373071	171343	328569	251874	376452	146862	137542	190471	159327	243881	255497	149460	146949
Q93052	LPP	Lipoma-preferred partner	9	154727	174273	146600	162551	148492	131411	161960	129411	160788	145723	134131	152464	148315	128122	156560	133985	166827	183253
Q9Y2L9-3	LRCH1	Isoform 3 of Leucine-rich repeat and calponin homology domain-containing protein 1	4	182755	202831	145786	166211	143160	185465	190719	152505	132683	134526	154959	215714	162290	169745	140829	127704	217933	226257
P02750	LRG1	Leucine-rich alpha-2-glycoprotein	10	1.48052e+06	894183	184955	871979	165332	186245	852284	164363	592557	171989	1.00699e+06	813231	1.29404e+06	1.04887e+06	660012	228990	1.02508e+06	792760
Q9H2I8	LRMDA	Leucine-rich melanocyte differentiation-associated protein	1	330322	361872	330067	374224	324095	304395	313631	338041	351233	307692	294140	314382	333116	311373	330839	344398	326432	273850
Q12912	LRMP	Lymphoid-restricted membrane protein	7	157073	158507	310703	190565	297207	313544	184843	301558	208641	318774	123707	186234	162759	194369	172525	318359	170436	135711
P42704	LRPPRC	Leucine-rich PPR motif-containing protein, mitochondrial	17	514426	188307	556752	276274	500115	438722	189901	542319	358726	521257	169646	249622	289307	253483	362504	467886	178937	225808
Q15048	LRRC14	Leucine-rich repeat-containing protein 14	1	48154.2	51031.6	83528.7	43317	85014.2	77932.5	58493.4	66037.5	54280.8	68599.5	51195.3	57153.6	66195.5	56643.4	71255.7	76941.1	68951.1	52974.8
Q9H9A6	LRRC40	Leucine-rich repeat-containing protein 40	6	256227	250124	234356	271247	224027	255345	265079	236703	221177	236103	242796	229554	221920	262021	246090	295810	233325	222383
Q8N1G4	LRRC47	Leucine-rich repeat-containing protein 47	11	310462	380570	355213	310363	375568	368631	362064	332100	338984	343278	368018	353056	289111	320244	315277	395690	337215	338526
Q8N9N7	LRRC57	Leucine-rich repeat-containing protein 57	6	392705	421583	424156	388694	454975	437751	434347	435898	416676	451149	426538	410297	409146	371483	404094	378968	411823	352363
Q96AG4	LRRC59	Leucine-rich repeat-containing protein 59	10	1.18846e+06	750925	1.15203e+06	888694	1.1864e+06	1.10317e+06	848168	1.17137e+06	965819	1.22681e+06	677138	773487	851527	819321	1.09636e+06	1.23786e+06	811044	896865
Q7L1W4	LRRC8D	Volume-regulated anion channel subunit LRRC8D	4	373039	83231.6	228373	152228	154898	229982	136602	218174	139638	189387	122576	128500	136313	119097	137308	161611	118162	155399
Q32MZ4-2	LRRFIP1	Isoform 2 of Leucine-rich repeat flightless-interacting protein 1	19	476650	437616	444373	426054	472768	425654	383527	425654	427855	456656	453613	389258	452710	455934	412134	465261	463433	435077
Q6UWE0	LRSAM1	E3 ubiquitin-protein ligase LRSAM1	1	28752.9	35630.1	48797.9	39235	30459	42257.4	39292.2	53331.7	39545.4	44495.8	38797.3	32640.1	27907.7	39292.2	40478.7	45441.6	33915.3	32810.2
O15116	LSM1	U6 snRNA-associated Sm-like protein LSm1	4	45944.7	48225.5	61455.8	43718.4	69757.7	57775.4	52250.3	58826.1	46817.2	64424.3	44869.9	47256.6	48391.1	44283.4	53394.7	71996.8	52250.3	60679.8
Q3MHD2-2	LSM12	Isoform 2 of Protein LSM12 homolog	1	52894.4	118051	56017.1	74420.4	46020.3	54104.6	64561.2	52740.3	47185.4	51925.4	58725.9	64731.8	52777.7	40066.7	51925.4	43643.4	53465.2	78871
Q9Y333	LSM2	U6 snRNA-associated Sm-like protein LSm2	2	132803	247702	138844	128562	143037	131090	185209	120572	124946	126176	254403	219454	162814	187183	132683	131719	188509	221875
P62310	LSM3	U6 snRNA-associated Sm-like protein LSm3	2	120258	117898	171155	109372	183518	170633	120816	170633	144986	186580	105560	114293	105259	123519	124055	190421	115388	137839
Q9Y4Z0	LSM4	U6 snRNA-associated Sm-like protein LSm4	2	276734	357034	408510	288971	423496	386671	318975	305006	331878	435454	367770	382703	279718	271491	281330	474950	294759	355684
Q9UK45	LSM7	U6 snRNA-associated Sm-like protein LSm7	2	679305	679305	473823	496296	617894	543212	714713	1.04126e+06	683467	1.20737e+06	757464	558991	1.05443e+06	861516	981580	655734	661308	517924
P48449	LSS	Lanosterol synthase	8	149739	110720	145723	102995	129796	130486	89941.3	111025	101973	93335	113476	104015	136703	116939	111642	101029	119381	129378
P09960	LTA4H	Leukotriene A-4 hydrolase	23	1.25688e+06	1.13729e+06	820488	1.07806e+06	1.03898e+06	1.03571e+06	1.04389e+06	830209	1.07806e+06	792696	982407	1.65564e+06	939142	1.24367e+06	1.1834e+06	904334	1.14358e+06	1.15626e+06
P02788	LTF	Lactotransferrin	33	1.38253e+06	776679	714524	993109	726220	1.72097e+06	763215	909665	805539	803782	986932	1.84865e+06	878039	1.02821e+06	991364	1.52808e+06	690657	849293
P51884	LUM	Lumican	9	832614	729443	173296	807139	178334	209767	865298	220287	634817	175694	712042	773849	933172	919515	533576	185338	731902	695994
Q9BS40	LXN	Latexin	2	169676	224969	282889	246518	209267	294939	186560	299156	214060	292880	177671	176363	182968	205497	224580	337166	179451	233925
O75608	LYPLA1	Acyl-protein thioesterase 1	5	205966	220084	349332	251874	355757	327307	232304	371747	293625	387032	229369	219495	236516	225013	289442	391198	209122	204502
O95372	LYPLA2	Acyl-protein thioesterase 2	3	301116	309078	329278	327501	377318	329906	295315	334053	341280	347771	279844	294967	289464	283354	304051	279711	292032	251918
Q5VWZ2	LYPLAL1	Lysophospholipase-like protein 1	5	716800	719218	662849	723244	689634	712747	809643	750718	839669	689096	710588	838107	774503	788080	705961	717000	794713	730565
Q99698	LYST	Lysosomal-trafficking regulator	4	56596.8	55903.3	53580.8	57073.8	64193.8	46196.9	57879.4	46547.5	57980.8	57583.1	49058.5	46089.6	52207.8	52207.8	61091.1	47559.1	56470.5	52456.5
P61626	LYZ	Lysozyme C	6	287684	148550	192690	180009	163053	341508	118336	214784	176797	178334	174947	293837	171945	225510	199190	333495	195517	181260
Q8WZA0-2	LZIC	Isoform 2 of Protein LZIC	7	293803	367434	394960	317756	416394	375813	307440	467231	359128	411443	378424	355910	312171	326014	339562	507155	357364	446478
P20645	M6PR	Cation-dependent mannose-6-phosphate receptor	9	234979	149156	304216	180390	297345	242534	232699	284121	201953	311260	149079	155180	197862	153122	182839	313544	193602	218726
Q7L5Y9	MAEA	E3 ubiquitin-protein transferase MAEA	2	330207	275761	164510	203139	210913	174798	291690	216094	203251	210913	287933	253290	257849	288075	226273	195318	294481	306605
Q9UNF1	MAGED2	Melanoma-associated antigen D2	16	335557	443369	379930	382318	383948	369252	426028	357238	369010	390364	362151	395502	363407	359696	330273	312469	425489	390576
Q16706	MAN2A1	Alpha-mannosidase 2	12	350741	414492	303799	392553	360068	375146	359998	420047	381889	392553	370696	350383	392086	419986	360239	458187	367805	397055
P49641	MAN2A2	Alpha-mannosidase 2x	13	238328	227655	326797	289124	352979	360239	249184	371026	308286	376115	274237	207292	304591	303415	291652	324095	238559	256109
O00754	MAN2B1	Lysosomal alpha-mannosidase	4	108234	127502	142071	89908.4	189884	132943	161125	187987	83971.2	107039	142098	145685	124822	144154	86371.7	156179	131238	133970
Q9NTJ4-4	MAN2C1	Isoform 4 of Alpha-mannosidase 2C1	9	183395	218001	288243	196566	286348	253869	182974	290701	239081	220947	214193	191742	193127	195582	177079	257757	207573	210930
O00462	MANBA	Beta-mannosidase	5	101529	94483	101529	97846.4	108051	110948	122241	121295	102789	111124	69665.7	130203	88368.8	108847	107737	135844	111925	115733
P55145	MANF	Mesencephalic astrocyte-derived neurotrophic factor	11	511474	651866	655520	564622	787217	661873	593268	718953	546711	658849	593019	664294	495993	515694	504897	799594	631462	795717
P27338	MAOB	Amine oxidase [flavin-containing] B	11	230746	125816	484779	215864	258620	387866	146671	376115	249527	393789	127599	236937	152871	155569	277857	306909	137112	172286
P78559-2	MAP1A	Isoform 2 of Microtubule-associated protein 1A	21	416998	464214	406316	482758	478146	453331	523013	441081	471217	524656	571554	471886	474898	379488	489899	570320	402925	512663
Q66K74	MAP1S	Microtubule-associated protein 1S	7	591417	645742	356156	304395	330627	351343	597117	320349	572344	307375	620317	615359	550999	587171	309920	314448	572589	608475
Q02750	MAP2K1	Dual specificity mitogen-activated protein kinase kinase 1	11	533663	638124	993109	735337	963223	1.02465e+06	759206	930522	767415	914891	625746	676630	615173	720718	778212	921194	616291	569609
P36507	MAP2K2	Dual specificity mitogen-activated protein kinase kinase 2	11	831482	885510	1.06034e+06	834056	1.0442e+06	1.03105e+06	890484	1.06975e+06	899824	1.0293e+06	822818	886498	768484	876910	819029	1.05561e+06	874181	749839
P46734-3	MAP2K3	Isoform 2 of Dual specificity mitogen-activated protein kinase kinase 3	10	573679	645318	661285	579934	651584	640050	612351	653252	632901	667553	582432	705496	557558	625620	600165	593203	598527	571053
P45985-2	MAP2K4	Isoform 2 of Dual specificity mitogen-activated protein kinase kinase 4	7	111292	166649	160481	159684	169228	149823	119711	140020	145176	151085	127714	153919	127070	162881	152505	147544	163166	125594
P52564	MAP2K6	Dual specificity mitogen-activated protein kinase kinase 6	5	143567	169486	244656	181156	252882	247764	133377	222498	195197	209862	154785	146334	162614	163999	165764	233730	149902	152368
Q99683	MAP3K5	Mitogen-activated protein kinase kinase kinase 5	23	570198	562055	454547	542319	482758	453801	581279	446555	507519	485194	557774	575032	575032	545492	508769	360239	542718	529248
O43318	MAP3K7	Mitogen-activated protein kinase kinase kinase 7	4	140683	127391	119068	120061	127973	119153	142488	110816	123527	121684	135273	112235	143001	124354	109832	128901	132125	123719
P27816	MAP4	Microtubule-associated protein 4	24	510552	495798	347771	438722	366579	340746	460292	390103	394960	361488	522396	397259	495798	499537	442229	349534	468527	490762
Q12851	MAP4K2	Mitogen-activated protein kinase kinase kinase kinase 2	5	76290	87262.7	77573.7	88798.5	74885.5	69757.7	91023.6	72640.5	114728	77327.9	81670.2	79834.5	74617.2	76051.4	83285	72168.9	91129.2	93440.9
O95819-3	MAP4K4	Isoform 3 of Mitogen-activated protein kinase kinase kinase kinase 4	10	196052	272343	276732	298710	281033	279711	251763	272027	301756	236573	270724	255103	241731	269638	292392	209497	274058	154999
Q9Y4K4	MAP4K5	Mitogen-activated protein kinase kinase kinase kinase 5	6	245980	231819	212414	201000	213213	191781	242379	203731	204710	180179	235081	230649	225622	218632	202921	203442	247924	229510
P28482	MAPK1	Mitogen-activated protein kinase 1	12	948681	1.23252e+06	1.01294e+06	1.03898e+06	1.04214e+06	1.01687e+06	1.09459e+06	1.05561e+06	1.0442e+06	1.06034e+06	1.17633e+06	1.21867e+06	1.03311e+06	1.14073e+06	1.05413e+06	1.0183e+06	1.14951e+06	1.33091e+06
P27361	MAPK3	Mitogen-activated protein kinase 3	5	196378	283967	170417	202286	212561	241688	306441	204169	213344	221177	228175	265696	267887	264606	226960	195197	320099	344402
P45984	MAPK9	Mitogen-activated protein kinase 9	3	79956.1	90634.4	40256.3	103826	45441.6	40394.4	85505.3	46928.9	89781.1	44336.7	97023.3	73316.9	114251	113270	74806.5	56109.9	68225.7	57251.1
Q9BPZ7	MAPKAP1	Target of rapamycin complex 2 subunit MAPKAP1	1	139161	136059	108562	232168	96763.5	88280.8	163640	93520.6	152228	96763.5	173112	155083	164914	171924	128901	78982.1	144492	122145
P49137	MAPKAPK2	MAP kinase-activated protein kinase 2	12	3.3501e+06	3.67718e+06	763631	4.11849e+06	778826	909665	3.83476e+06	525090	3.81938e+06	624216	4.00462e+06	3.64025e+06	3.94064e+06	3.96885e+06	3.7531e+06	637518	3.68487e+06	4.13036e+06
Q16644	MAPKAPK3	MAP kinase-activated protein kinase 3	6	1.2613e+06	1.36383e+06	535582	1.1188e+06	541048	523742	1.30296e+06	522547	1.06829e+06	686145	1.42533e+06	1.3604e+06	1.19195e+06	1.37212e+06	1.00661e+06	568541	1.35835e+06	1.75634e+06
Q15691	MAPRE1	Microtubule-associated protein RP/EB family member 1	16	1.63612e+06	1.33103e+06	2.08878e+06	1.75679e+06	2.24879e+06	1.95593e+06	1.58736e+06	1.76367e+06	1.9479e+06	2.07993e+06	1.501e+06	1.36001e+06	2.3285e+06	1.65744e+06	1.84323e+06	2.16539e+06	1.24105e+06	1.25648e+06
Q15555	MAPRE2	Microtubule-associated protein RP/EB family member 2	14	716425	905898	990463	727025	1.10317e+06	890374	774863	848174	887755	1.0442e+06	818410	883538	733293	736714	931383	1.01687e+06	872962	833325
Q7KZI7	MARK2	Serine/threonine-protein kinase MARK2	4	110694	130899	143282	133377	156560	157538	127253	156560	144119	142781	133781	150510	128153	130899	133260	142926	144927	149314
P27448-7	MARK3	Isoform 6 of MAP/microtubule affinity-regulating kinase 3	2	47245.1	56225.7	42017.9	44638.9	73869.9	43465.5	55270.5	64387.6	47590	71445.9	61045.3	55787.3	47607	61142.2	36481.4	78722.6	70709.5	52893.2
P56192	MARS	Methionine--tRNA ligase, cytoplasmic	12	328082	303950	348330	359128	338876	317443	324841	316462	293181	315121	317141	355447	308222	295333	298009	351076	310286	331963
P48740	MASP1	Mannan-binding lectin serine protease 1	4	276177	241566	115836	208041	121295	119859	213539	100546	183919	104325	239745	159842	289945	188559	167459	118537	226218	195566
O00187	MASP2	Mannan-binding lectin serine protease 2	1	246187	229974	100873	203997	90828	104806	266259	91889.5	210749	95713.5	254680	220094	324779	272882	201000	96763.5	233965	204146
P31153	MAT2A	S-adenosylmethionine synthase isoform type-2	6	240479	279142	334707	291778	395295	344071	242001	436793	305142	372873	290761	293842	256636	272503	291445	476675	290398	309504
Q9NZL9	MAT2B	Methionine adenosyltransferase 2 subunit beta	8	273180	278322	139434	318359	277857	205189	248983	342760	256796	338984	242763	264830	238459	256468	261021	339235	264830	306988
Q7Z434	MAVS	Mitochondrial antiviral-signaling protein	9	166014	162239	194256	144382	159684	224734	171467	158472	154657	179134	150439	148003	158149	141000	149929	160097	195578	133617
P11226	MBL2	Mannose-binding protein C	2	175004	241529	67684.9	276835	76580	48014.1	185327	60958.7	110816	65637.3	159534	131543	201680	132527	143373	92842.1	180172	159725
Q9NR56	MBNL1	Muscleblind-like protein 1	4	597489	580706	743750	671761	860810	850791	619969	696726	703967	778822	587320	652235	536265	542439	696285	612170	615479	643666
P43121	MCAM	Cell surface glycoprotein MUC18	1	46029.4	39133.2	20977.7	37144.2	21276.2	18448	46070.6	23238.6	30782.6	16446.1	49972.5	41848.2	49757.4	45845.5	31885.6	23561.9	46719.1	50814.7
Q9ULC4-3	MCTS1	Isoform 3 of Malignant T-cell-amplified sequence 1	9	403956	505455	432780	426888	431640	462877	478098	449154	449926	415079	432106	450158	426091	464251	428649	559542	480223	514722
P40925-3	MDH1	Isoform 3 of Malate dehydrogenase, cytoplasmic	15	914880	1.12176e+06	1.04535e+06	1.06975e+06	1.07086e+06	1.01517e+06	1.02604e+06	979451	1.03571e+06	1.01224e+06	1.0544e+06	1.12176e+06	964160	1.11722e+06	1.01224e+06	1.02031e+06	1.10916e+06	1.27039e+06
P40926	MDH2	Malate dehydrogenase, mitochondrial	17	960917	381352	958532	841934	1.06829e+06	968072	928045	1.03827e+06	913766	929464	555500	624714	1.39762e+06	1.27635e+06	945827	1.24578e+06	590972	615275
Q86V88	MDP1	Magnesium-dependent phosphatase 1	3	110216	127448	87586.2	103689	94145.6	99366	119411	117774	104628	104269	132799	121351	117946	111360	115276	113013	126582	133523
P48163	ME1	NADP-dependent malic enzyme	10	261246	235428	356757	291257	214653	217007	436303	494325	236703	305647	261037	276333	322850	327320	261446	349942	331060	262594
P23368	ME2	NAD-dependent malic enzyme, mitochondrial	21	1.47826e+06	792831	1.88809e+06	943071	1.21085e+06	1.39811e+06	960699	1.20245e+06	1.14402e+06	1.17974e+06	873453	1.02576e+06	1.05015e+06	1.22561e+06	980866	2.08143e+06	820400	969139
Q6P9B6	MEAK7	MTOR-associated protein MEAK7	2	294588	319111	302867	251037	255169	245541	336878	438158	290701	239081	392070	301946	286316	310210	273436	381165	347226	321290
Q9Y316-3	MEMO1	Isoform 3 of Protein MEMO1	3	215042	293475	378968	241688	320837	294120	275044	340606	248909	295810	244748	229166	257318	254742	277453	356156	281099	308518
Q14696	MESD	LRP chaperone MESD	8	314476	364422	337754	341508	345496	311990	293347	350904	319113	379668	335774	352719	321307	331114	299608	366394	337301	396791
P53582	METAP1	Methionine aminopeptidase 1	8	273084	297022	161320	272928	159343	154727	285014	164510	223849	151712	264407	281929	281469	250539	197192	184676	271504	300648
P50579	METAP2	Methionine aminopeptidase 2	4	39665.5	58232.4	123103	61911.4	79873.5	76580	55214.3	78491.5	59744.9	78887.6	65856.2	66643.4	48556.5	59114.4	81979.7	150855	67938.8	56941.8
O95568	METTL18	Histidine protein methyltransferase 1 homolog	2	161262	160243	175063	131493	182795	168693	159156	136594	151712	228016	174112	177028	166922	151051	129998	163983	156189	178997
Q96S19	METTL26	Methyltransferase-like 26	5	140222	160013	124378	123822	124227	126369	150150	146500	126369	142009	163356	146859	123600	164089	114054	143463	159878	160596
Q6ZSS7	MFSD6	Major facilitator superfamily domain-containing protein 6	3	66822.8	59951.3	104269	57224.6	76326.7	112841	60217.1	108677	62209.2	88380.2	51721.2	57863.7	60710.7	55723.6	80031.6	107908	53199.8	64070.8
Q99685	MGLL	Monoglyceride lipase	12	637574	720247	687005	636110	834056	693410	743653	577912	746741	618057	845353	756552	769890	725182	750718	733614	699334	963799
P16455	MGMT	Methylated-DNA--protein-cysteine methyltransferase	1	352955	325565	285508	271679	321808	278693	304345	329747	277453	284318	295277	321504	358314	307740	344925	475406	349039	315491
Q99735	MGST2	Microsomal glutathione S-transferase 2	1	60167.4	33787.1	112246	57502.2	76051.4	58918.9	58522.4	62550	80675.4	76197.1	62083.7	57993.1	50657.5	44056.4	71653.2	58826.1	49301.1	38204.9
Q8TDZ2-4	MICAL1	Isoform 4 of [F-actin]-monooxygenase MICAL1	20	261063	242683	204476	230358	267933	265832	218547	253191	245242	244656	244457	229849	208638	210752	216631	231134	239529	225220
Q9BPX6-3	MICU1	Isoform 3 of Calcium uptake protein 1, mitochondrial	4	107298	122070	134649	108677	138511	142684	129405	122683	108939	131653	105313	122737	101409	131645	107908	141657	128218	111553
Q8IYU8	MICU2	Calcium uptake protein 2, mitochondrial	3	186151	201676	114398	170633	121107	115276	215227	75860.9	123299	100701	164737	199643	165109	195437	127973	87586.2	226214	220647
Q9BRT3	MIEN1	Migration and invasion enhancer 1	2	128646	197533	102227	146346	104186	98846.2	159391	80596.3	125657	91436.8	184976	152999	159297	132759	116796	90205.6	151924	157599
P14174	MIF	Macrophage migration inhibitory factor	3	106409	115222	173571	141657	194435	168316	114966	163680	147843	181259	136578	134121	106610	124800	156704	196200	128093	131156
A9UHW6	MIF4GD	MIF4G domain-containing protein	6	349522	428533	202814	385859	240381	228180	410402	312905	292242	319474	422355	398733	368356	345409	307065	241535	404661	420811
Q8N5J2-3	MINDY1	Isoform 3 of Ubiquitin carboxyl-terminal hydrolase MINDY-1	7	203425	231294	284318	251515	262354	242406	222747	312164	236282	282889	206864	230571	199898	315962	252228	297345	195180	193852
Q8NBR6	MINDY2	Ubiquitin carboxyl-terminal hydrolase MINDY-2	2	284515	281848	183217	230948	167459	166330	247278	224103	210457	174994	239267	239267	276961	281445	194131	257661	223581	253031
Q9H8M7	MINDY3	Ubiquitin carboxyl-terminal hydrolase MINDY-3	1	46726.2	46726.2	56929.5	46571.2	54139.3	53264.2	47417.8	50009.6	54018.5	52636.7	42868.3	37045	34672.6	34672.6	41583.3	65488.7	53044.5	48466.9
Q9UNW1	MINPP1	Multiple inositol polyphosphate phosphatase 1	1	64716.2	67920	115436	81317.2	113013	120941	91635.6	104692	92842.1	97956	91753.9	59613.7	106787	73417.8	101529	123299	69397.7	67234.1
Q14165	MLEC	Malectin	12	611626	359467	807139	481036	538287	796699	577975	717000	561228	630655	321876	466132	479316	471088	515078	567085	440651	503656
Q8NB16	MLKL	Mixed lineage kinase domain-like protein	2	79975.8	71115.5	41400.7	142926	55687.8	43015.7	88221.8	43806	119403	52570	104322	112337	87127.9	78603.4	65637.3	44252.2	95132.5	89659.9
Q9BVC4	MLST8	Target of rapamycin complex subunit LST8	2	204770	227137	104806	233048	116947	123822	304471	84170.1	169103	90630.2	259199	272698	265305	241165	191423	83457.3	297391	229432
Q9HAP2	MLXIP	MLX-interacting protein	2	235309	255718	325106	242406	351076	309015	218491	345496	287768	303799	236027	263826	223012	241539	277285	329559	236197	221988
Q96EY8	MMAB	Corrinoid adenosyltransferase	1	76050.3	28754.5	60138.5	26362.5	56602.1	43025.8	37554.1	46483.3	42811.6	24273.3	32546.5	45453.2	59568	57438.7	36929.2	70508.9	32839.8	53178.5
P03956	MMP1	Interstitial collagenase	4	150044	210048	123689	140356	125757	167775	121615	240528	241014	205877	148727	168629	181672	252692	162938	211416	167560	157864
P14780	MMP9	Matrix metalloproteinase-9	9	206331	166000	211895	171566	186666	322345	141077	190150	164299	196744	193335	212444	198693	178665	198262	356639	141077	150377
Q13201	MMRN1	Multimerin-1	46	1.91932e+06	1.79836e+06	2.61319e+06	2.12792e+06	3.24457e+06	3.08546e+06	2.09837e+06	2.45176e+06	2.4095e+06	3.60167e+06	1.78307e+06	2.17176e+06	1.76269e+06	2.08915e+06	2.15478e+06	2.20368e+06	2.00182e+06	1.90716e+06
Q96T76-8	MMS19	Isoform 5 of MMS19 nucleotide excision repair protein homolog	10	275557	276716	338041	348649	322963	311885	288110	323341	280055	362053	599481	373332	618235	337609	306300	360500	325153	279502
P41218	MNDA	Myeloid cell nuclear differentiation antigen	8	737930	438199	377621	402547	335907	724646	315611	432780	484337	393987	518710	768387	374705	486747	499053	546711	266090	373103
Q7L9L4-2	MOB1B	Isoform 2 of MOB kinase activator 1B	4	882021	923899	972211	778212	976622	923683	893545	893317	886512	1.02709e+06	866143	1.0444e+06	896445	981244	839669	1.10966e+06	936944	1.09529e+06
Q70IA6-3	MOB2	Isoform 3 of MOB kinase activator 2	5	272624	288968	318774	252039	322268	289644	254035	295615	266025	337360	266734	266534	275762	289880	277150	347457	297943	297458
Q96BX8	MOB3A	MOB kinase activator 3A	1	158221	180538	146228	157008	113389	119010	127685	149751	106446	125943	166556	158556	150683	119039	117486	141612	144265	163360
Q70IA8	MOB3C	MOB kinase activator 3C	3	125500	125627	206258	185304	217815	189988	148959	173167	196500	201705	134892	141350	136587	117497	178179	151037	153178	158387
Q9Y3A3	MOB4	MOB-like protein phocein	5	103767	107460	179028	112841	138633	162336	106747	132882	107305	133176	99277.8	108511	112523	96132.5	109372	165181	103435	107460
Q13724	MOGS	Mannosyl-oligosaccharide glucosidase	8	238076	162469	207099	219270	193938	208641	228016	215389	187834	203731	169689	167840	221869	185239	167901	196372	204878	211973
Q7L1V2	MON1B	Vacuolar fusion protein MON1 homolog B	3	153206	124861	87199.2	145592	92517.9	98939.5	119860	98371.9	103689	97614.5	127632	127898	130765	130520	85403.4	83971.2	134125	132722
Q7Z3U7	MON2	Protein MON2 homolog	7	160178	159640	218358	169228	217624	246090	165316	223072	172732	233847	147297	174912	148055	163991	192690	194716	162177	143573
O75352	MPDU1	Mannose-P-dolichol utilization defect 1 protein	1	63435.3	18049.5	127213	59934.2	94051.1	116947	31648.7	105694	76443.2	123103	20969.5	30508.3	10493.8	28055.9	100921	76379.8	10493.8	19125.5
P34949	MPI	Mannose-6-phosphate isomerase	5	145177	157657	187442	202431	192879	181488	162845	175943	190177	180261	153826	172428	146203	164815	228785	172235	163259	159629
P05164-3	MPO	Isoform H7 of Myeloperoxidase	19	999416	923438	1.16337e+06	1.03571e+06	1.25719e+06	1.29101e+06	909458	1.3885e+06	1.03325e+06	1.30496e+06	1.15337e+06	1.50401e+06	925215	973853	1.07257e+06	2.02129e+06	811079	900474
Q00013	MPP1	55 kDa erythrocyte membrane protein	23	719929	828917	977819	811243	972211	972211	821410	972211	896041	983710	769311	805592	728504	722387	874323	977819	879834	827926
Q5T2T1	MPP7	MAGUK p55 subfamily member 7	3	269099	181749	180179	186468	214489	177563	136008	179290	199872	184178	182453	366413	150122	189112	134371	213761	141034	175540
P25325-2	MPST	Isoform 2 of 3-mercaptopyruvate sulfurtransferase	11	263611	237296	248648	234279	262100	245081	286974	199872	247645	251874	273975	292426	270293	287495	258776	260024	257730	279872
Q9BV20	MRI1	Methylthioribose-1-phosphate isomerase	6	52178.4	83309.3	50972.1	51102.7	47317.4	49999.3	86412.2	46744.9	58092.1	55512.7	66628.5	57094.5	60615.8	59845.9	64714.4	56017.1	63530.7	45578.5
Q8NDA8	MROH1	Maestro heat-like repeat-containing protein family member 1	4	77191.3	63860.5	65379.7	79407	109372	97417.4	69739.9	101888	84031.2	98267.8	66260.2	65491.3	68159.6	64972.2	94145.6	73835.1	50769.4	61830.4
Q9Y6F6-7	MRVI1	Isoform 7 of Protein MRVI1	20	338467	254115	352374	303687	299156	383212	306267	340907	309015	358106	290132	277398	289581	241597	311885	288691	306455	263540
P26038	MSN	Moesin	47	4.02948e+06	4.2597e+06	7.636e+06	4.15884e+06	7.89707e+06	7.89707e+06	4.37063e+06	8.8752e+06	4.82902e+06	6.80586e+06	4.18619e+06	4.37063e+06	3.4932e+06	3.91099e+06	4.42591e+06	9.60708e+06	4.02948e+06	4.96683e+06
Q9UJ68	MSRA	Mitochondrial peptide methionine sulfoxide reductase	5	442723	548344	120061	328332	117602	128309	549418	96926.5	310892	111450	568359	465152	544274	493041	431391	124715	476615	509324
Q8IXL7	MSRB3	Methionine-R-sulfoxide reductase B3	1	543937	857658	584221	641820	539216	505322	669282	540354	1.1834e+06	569190	547353	618637	564736	656317	543425	754273	632477	669930
P26927	MST1	Hepatocyte growth factor-like protein	6	397697	448007	123598	361269	123944	134371	444525	138844	324095	142684	395265	356984	524448	396518	284318	158588	478495	376038
Q86UE4	MTDH	Protein LYRIC	16	222164	208159	270374	225235	285032	244864	231089	237270	251384	263872	230677	203386	216972	219982	262714	279840	212277	256699
P11586	MTHFD1	C-1-tetrahydrofolate synthase, cytoplasmic	36	757089	864553	927404	925543	971093	1.04788e+06	800165	801766	923683	957848	883215	843223	800165	843223	850144	883762	812624	864553
P42898-2	MTHFR	Isoform 2 of Methylenetetrahydrofolate reductase	11	222707	322912	401574	327060	333049	279510	305346	304819	347457	279158	379201	285158	287238	336797	272560	293811	273215	357333
Q13496	MTM1	Myotubularin	13	876437	908970	965819	807856	899824	929464	867041	859135	890374	838738	873516	827754	911990	827754	836675	907753	922029	873957
Q9C0I1	MTMR12	Myotubularin-related protein 12	21	631550	649251	913766	665768	952331	901884	633600	819728	816828	898502	572021	657393	588871	626100	740665	785660	653269	572466
Q8NCE2	MTMR14	Myotubularin-related protein 14	6	50273.5	103815	168047	113736	147741	135240	88663.5	112560	119959	126930	85330.3	93059.7	55959.9	89666	120755	142009	69649.6	68162.6
Q13614	MTMR2	Myotubularin-related protein 2	6	300790	388028	167150	244044	174629	160788	381752	182511	263353	167459	367342	311931	366959	332431	241688	201953	354017	379799
Q9Y217	MTMR6	Myotubularin-related protein 6	1	86980.7	109368	60574.9	64847.3	62138.7	72735	90824.8	70629.6	61005.6	71255.7	115575	84889.8	100848	101096	59146.2	68686.1	104349	95538.7
Q96QG7	MTMR9	Myotubularin-related protein 9	2	44512.9	50992.1	39142.8	42452.6	44592.1	44145.2	34442.7	46352.2	41470	43104.3	56173.9	45426.1	44069.2	45779.2	41334.2	44954	45709.3	53441.3
P42345	MTOR	Serine/threonine-protein kinase mTOR	8	206784	252489	223158	231634	259219	223003	228935	262354	251112	253191	213426	214764	197436	206091	218249	193359	214764	169514
P58546	MTPN	Myotrophin	5	1.30318e+06	1.69159e+06	2.16791e+06	1.72757e+06	2.31887e+06	2.329e+06	1.64171e+06	1.70821e+06	1.99915e+06	2.46712e+06	1.58841e+06	1.65296e+06	1.62631e+06	1.5111e+06	1.83067e+06	1.66475e+06	1.568e+06	1.7338e+06
O43312-5	MTSS1	Isoform 4 of Protein MTSS 1	18	473318	544521	581131	519996	624912	520690	516426	535582	552949	565341	553293	462646	495496	469145	532972	491177	484151	490481
Q8N3F0	MTURN	Maturin	1	125175	129714	105201	108306	91640.1	86581.1	125175	90025.6	89309.9	92341.5	124375	109950	112413	83686.3	104460	122118	131538	93556.6
P53602	MVD	Diphosphomevalonate decarboxylase	5	241897	226608	371747	247558	387454	380339	232660	355213	282889	442229	295882	190186	242237	257172	276518	396518	280658	260622
Q14764	MVP	Major vault protein	16	265557	227700	253483	261174	316462	289124	214319	379489	262803	304216	213830	211133	199186	251074	276597	423496	247753	290298
Q96S97	MYADM	Myeloid-associated differentiation marker	2	106383	126630	81762.1	94107.8	80031.6	66626	126937	79233	83629.3	83971.2	100637	104002	112856	103386	82517.1	76733.3	105369	94738.9
Q99417	MYCBP	c-Myc-binding protein	3	1.36612e+06	1.06689e+06	370281	923683	413621	386059	940090	376452	763631	351605	963630	868652	1.1491e+06	1.02062e+06	528764	513665	1.02817e+06	915061
O75592	MYCBP2	E3 ubiquitin-protein ligase MYCBP2	15	159793	183014	188675	189808	208978	211416	209065	190799	191154	201815	164505	187934	184027	189601	196372	139837	234040	162595
Q8N699	MYCT1	Myc target protein 1	4	323780	266384	306467	283911	294400	321568	254707	344398	312681	404094	256908	256788	269643	275776	257757	331878	258632	312966
Q99836-6	MYD88	Isoform 6 of Myeloid differentiation primary response protein MyD88	2	41218.7	52032.9	64034.6	75228.2	86541.3	77337.7	47245.1	98339.6	64205.5	79854.4	58329	55219.9	42100.4	50348.4	62989	84788.3	48787	52032.9
Q969H8	MYDGF	Myeloid-derived growth factor	3	508249	491717	783960	626627	893317	853341	476232	899824	636110	853341	462595	478796	440729	398469	702727	1.06975e+06	511711	571301
P35580-4	MYH10	Isoform 4 of Myosin-10	21	84436	97804.7	75542.9	103346	125240	63035	106838	64518.6	86507.5	92451.3	78718.9	90355	91002.8	75901.7	83971.2	75676.1	96378.1	90919.5
P35579	MYH9	Myosin-9	139	5.93097e+06	9.54216e+06	1.58842e+07	1.11022e+07	2.78968e+07	8.46451e+06	9.54216e+06	8.16125e+06	7.636e+06	1.9286e+07	5.93097e+06	1.17229e+07	6.41634e+06	8.14863e+06	6.99632e+06	6.99632e+06	9.93224e+06	8.14863e+06
O14950	MYL12B	Myosin regulatory light chain 12B	10	346462	787215	699729	766382	1.07384e+06	422789	520240	561326	556991	857615	487339	623689	460334	556679	437774	483308	546393	870183
P60660	MYL6	Myosin light polypeptide 6	10	539547	1.01878e+06	950919	1.08881e+06	1.27879e+06	415432	718842	665768	702727	1.13553e+06	722815	777674	652612	769189	611476	803782	800443	1.21727e+06
P14649	MYL6B	Myosin light chain 6B	3	170231	300704	280258	476208	521257	182511	231292	91819.2	224580	224433	233761	270847	220957	228449	184676	119010	239062	360320
P24844	MYL9	Myosin regulatory light polypeptide 9	11	953775	1.424e+06	1.40318e+06	1.9231e+06	2.4238e+06	859135	1.38252e+06	973983	1.1418e+06	1.79421e+06	1.33079e+06	1.0729e+06	1.33443e+06	1.27483e+06	922103	1.29433e+06	1.30264e+06	1.88015e+06
Q15746	MYLK	Myosin light chain kinase, smooth muscle	32	1.05586e+06	1.25618e+06	1.38002e+06	1.27879e+06	1.35709e+06	1.30948e+06	1.26278e+06	1.60975e+06	1.22938e+06	1.32306e+06	1.18388e+06	1.18227e+06	1.23905e+06	1.20623e+06	1.21702e+06	1.79421e+06	1.24833e+06	1.36162e+06
Q92614	MYO18A	Unconventional myosin-XVIIIa	5	95022.9	122517	91436.8	131090	111309	87448.8	110789	71174.9	106986	118364	73990.2	124758	100043	97732.3	102227	79476.4	117607	71723.8
O00159	MYO1C	Unconventional myosin-Ic	5	546266	1.58893e+06	490700	740157	532972	481787	968710	669030	695729	577912	674258	1.22844e+06	827375	1.14034e+06	651584	571169	1.13725e+06	996324
Q9Y4I1-3	MYO5A	Isoform 3 of Unconventional myosin-Va	11	115028	226707	207244	148598	237914	163680	191585	192879	149751	241798	159996	168820	155791	165397	157966	220709	195340	137786
Q13459	MYO9B	Unconventional myosin-IXb	26	417499	497953	460473	453331	450809	458343	481614	471057	420668	458709	457438	505988	425674	450771	445080	424156	484315	422255
P41227	NAA10	N-alpha-acetyltransferase 10	3	862471	900530	488785	721486	613735	517949	843039	785660	990463	824551	905498	789265	951813	953540	1.22681e+06	715073	1.15453e+06	889512
Q9BXJ9	NAA15	N-alpha-acetyltransferase 15, NatA auxiliary subunit	12	373858	332336	217007	297604	234106	215552	349264	220947	277150	226182	309632	319170	325612	318874	321568	197405	372065	290267
Q9GZZ1	NAA50	N-alpha-acetyltransferase 50	3	492558	795649	157884	602256	163355	166847	612709	166466	434405	181488	757053	612709	785074	674601	447160	194435	673908	781882
E9PAV3	NACA	Nascent polypeptide-associated complex subunit alpha, muscle-specific form	4	114568	87937.2	91819.2	79948.7	101529	89110.2	77407.1	140101	92670.6	108207	82432.9	88619	73739.3	67349.6	88798.5	115836	86246.9	105382
Q6IA69	NADSYN1	Glutamine-dependent NAD(+) synthetase	5	233682	208436	217830	248268	261635	222006	219593	210579	232441	234692	219233	199403	218216	198081	218174	199020	215775	219593
Q13564-4	NAE1	Isoform 4 of NEDD8-activating enzyme E1 regulatory subunit	9	215350	230358	285213	229343	299405	285508	212353	308547	244421	298009	213934	213934	221389	245587	227123	292057	222360	221389
P17050	NAGA	Alpha-N-acetylgalactosaminidase	4	366008	308500	124488	237914	136028	136305	296195	134883	234106	148403	295147	271712	333699	358379	224433	159249	305105	333699
Q9UJ70-2	NAGK	Isoform 2 of N-acetyl-D-glucosamine kinase	6	181646	192810	235332	187442	206600	226273	172631	268385	202921	245081	182800	201640	184334	184925	184464	250850	193490	214514
P54802	NAGLU	Alpha-N-acetylglucosaminidase	2	69875	92928.1	70493.6	61242.7	107032	100295	73108.6	61939.9	98395.3	218840	91583.5	66711.9	73244.2	69397.2	81939.8	81280	72319.6	72319.6
P43490	NAMPT	Nicotinamide phosphoribosyltransferase	12	269351	264844	383948	298895	344071	443697	275736	359128	278016	365683	276801	257240	279762	291402	350904	470113	275246	248242
Q9NR45	NANS	Sialic acid synthase	3	158156	204875	173094	156601	196079	163983	161633	219270	171155	193197	167237	192489	163370	185030	166618	204169	161172	190864
P55209	NAP1L1	Nucleosome assembly protein 1-like 1	13	3.50816e+06	4.13867e+06	1.47891e+06	3.63366e+06	1.51972e+06	1.44595e+06	4.07604e+06	1.72097e+06	3.51818e+06	1.34254e+06	3.60931e+06	4.22724e+06	3.60931e+06	3.78522e+06	3.42578e+06	1.88082e+06	4.70603e+06	4.72078e+06
Q99733-2	NAP1L4	Isoform 2 of Nucleosome assembly protein 1-like 4	10	219664	236872	315277	231474	343278	271110	216978	407321	257661	310125	237398	165233	241208	254515	277682	379489	205107	262430
P54920	NAPA	Alpha-soluble NSF attachment protein	14	472711	485013	605188	430252	585812	642547	419719	595310	530033	579284	457453	489002	439339	403799	477741	517949	477630	499607
Q9H115	NAPB	Beta-soluble NSF attachment protein	4	133204	147703	125385	178249	128901	138203	159696	101683	178432	93409.5	143745	112704	160677	108131	160603	131090	123259	90151.3
Q99747	NAPG	Gamma-soluble NSF attachment protein	12	260537	196059	299405	249793	250515	260024	219960	279050	262100	274519	210696	214793	238295	241821	259645	215047	244960	211737
O43776	NARS	Asparagine--tRNA ligase, cytoplasmic	11	885586	976432	1.01224e+06	1.02709e+06	1.01517e+06	966901	953618	626037	888694	958532	1.02131e+06	929946	903837	885586	917944	841934	926352	969680
P18440	NAT1	Arylamine N-acetyltransferase 1	3	89433.3	98633.7	43718.4	94673.3	45824.5	41242	121180	49892.2	76326.7	46533.2	128404	106458	102309	103103	75860.9	50666	111320	113774
Q8IW45-2	NAXD	Isoform 2 of ATP-dependent (S)-NAD(P)H-hydrate dehydratase	2	29337	41036.8	35958.6	37268.9	30255.9	32963.6	42065.3	34755.4	32841.1	22924	34830.5	36105	38816.8	34203.3	26395.6	38032.5	41036.8	43720.3
Q8NCW5	NAXE	NAD(P)H-hydrate epimerase	7	145907	171157	183919	174115	180916	173687	167698	162443	167505	196200	159988	151175	175801	157402	172235	159343	187165	170639
A2RRP1	NBAS	Neuroblastoma-amplified sequence	17	269607	176806	322268	261021	331419	333825	287477	305647	258620	323751	213842	213271	219686	227647	319113	253055	247209	186984
Q6ZNJ1	NBEAL2	Neurobeachin-like protein 2	54	2.57047e+06	2.72597e+06	1.80466e+06	2.18312e+06	1.99915e+06	1.93025e+06	2.67838e+06	1.84744e+06	2.06804e+06	1.77749e+06	2.39963e+06	2.69633e+06	2.42576e+06	2.58501e+06	2.28075e+06	1.65929e+06	2.74137e+06	2.07988e+06
Q15080	NCF4	Neutrophil cytosol factor 4	2	58851.4	55023.5	47619.3	63393	48271	61246.5	37319.4	50792.2	36940.3	47317.4	86511.2	111462	43712.1	71155.8	59852.5	81555.6	36844.8	45431.4
P16333	NCK1	Cytoplasmic protein NCK1	10	193229	244208	219983	221856	251874	233593	202836	253483	257511	241535	219594	229817	217298	212603	231765	267933	215587	232681
O43639	NCK2	Cytoplasmic protein NCK2	16	767483	767483	933851	699981	993109	914891	718854	988482	815319	1.07086e+06	682133	661144	720410	663588	744536	1.03571e+06	718854	716401
Q9Y2A7-2	NCKAP1	Isoform 2 of Nck-associated protein 1	29	977134	1.00498e+06	964422	946969	1.10739e+06	979451	988334	1.11535e+06	1.01517e+06	1.12312e+06	865211	1.06613e+06	979642	1.07026e+06	969962	945827	1.08823e+06	819781
P55160	NCKAP1L	Nck-associated protein 1-like	15	880816	894541	1.31532e+06	1.06281e+06	1.371e+06	1.32809e+06	967597	1.42605e+06	1.17761e+06	1.24188e+06	905782	967597	878299	884524	1.05962e+06	943071	893683	759010
Q9NZQ3	NCKIPSD	NCK-interacting protein with SH3 domain	9	167732	217085	328086	211036	313761	281960	192899	295411	252039	326334	194529	236666	200760	213652	246336	259645	241573	209957
P19338	NCL	Nucleolin	12	749116	431715	489617	501117	444022	653802	468930	805539	517949	489899	365384	703683	488007	569467	503638	536739	400307	449042
Q92542	NCSTN	Nicastrin	7	213327	175561	234597	217417	208041	222289	166948	239683	203731	223362	167507	161398	191766	182550	189808	278016	154907	203032
Q9UGV2	NDRG3	Protein NDRG3	2	434234	547744	657376	437751	622779	634817	361842	534042	517119	628310	355685	395280	378045	439261	464777	571618	534606	482093
Q9NVZ3-2	NECAP2	Isoform 2 of Adaptin ear-binding coat-associated protein 2	5	215356	240359	209754	218232	228709	202448	232425	226115	223663	231644	242001	242001	223403	229660	255376	273384	220104	254170
Q15843	NEDD8	NEDD8	3	571128	697662	317919	543425	326166	310363	658520	370051	576959	322066	658520	833971	554689	698373	547895	463209	606627	685259
Q8TDX7	NEK7	Serine/threonine-protein kinase Nek7	6	559818	591588	283911	439563	321357	277453	571568	235864	431391	253869	523662	610654	516025	492597	455919	258972	574476	506689
Q8TD19	NEK9	Serine/threonine-protein kinase Nek9	19	508403	545569	469551	487395	475968	481036	544523	536274	481787	480646	536292	469896	589154	533841	456966	474243	543385	472136
Q9UMX5	NENF	Neudesin	5	281365	299882	496067	399960	438158	467606	286740	486900	400582	472155	295176	310321	309559	361402	343680	623071	320120	319252
O94916-5	NFAT5	Isoform E of Nuclear factor of activated T-cells 5	1	106217	138861	96324.6	178587	146089	78411.4	109700	146089	179578	174269	104470	114006	106682	111083	124534	165488	132268	139603
Q16621	NFE2	Transcription factor NF-E2 45 kDa subunit	1	13792.4	40394.5	54543.9	24261.1	50929.5	70010.8	13792.4	43201.7	30459	57502.2	23471.6	8778.48	33766.9	22468.5	21995.9	78826.8	19878.8	24634.8
P19838-2	NFKB1	Isoform 2 of Nuclear factor NF-kappa-B p105 subunit	8	330277	308836	383212	356156	408510	379668	280817	441410	360500	404952	336276	321529	449216	255283	326166	370557	270399	381342
Q00653	NFKB2	Nuclear factor NF-kappa-B p100 subunit	2	74187.7	95271.4	65035.2	85288.3	97315	90118	74087.4	54801.6	94805.8	72735	99810.1	75050.8	87993.9	98584.5	62370.7	62455.2	75417.8	97400.6
Q96IV0	NGLY1	Peptide-N(4)-(N-acetyl-beta-glucosaminyl)asparagine amidase	7	129091	173492	127769	182009	119153	131554	157701	138007	143160	129537	181802	152589	158603	172360	151712	138966	185513	173706
Q8NBF2	NHLRC2	NHL repeat-containing protein 2	16	478457	558176	544848	624912	547292	509482	611213	501366	544415	520690	562557	497039	596135	556069	525090	602256	532162	476290
P14543	NID1	Nidogen-1	30	1.00467e+06	970371	724646	990463	845826	738555	902034	1.17761e+06	929464	1.22938e+06	915458	861101	908626	942117	870315	1.17974e+06	970371	1.26551e+06
Q14112	NID2	Nidogen-2	23	463271	600929	385566	504525	526063	486900	529580	447972	478610	517119	507945	551650	511669	542801	467886	560477	586278	705468
Q9GZT8	NIF3L1	NIF3-like protein 1	3	141503	137829	101003	128720	89110.2	97956	109873	78107.5	116390	71864.4	131290	122724	124388	129658	108939	103115	136678	149693
Q9BPW8	NIPSNAP1	Protein NipSnap homolog 1	4	179065	122539	189808	120720	220709	210749	117898	228373	135292	184565	117216	146626	137502	117898	126758	210749	85417.5	78548.9
O75323	NIPSNAP2	Protein NipSnap homolog 2	5	472485	160783	571618	334267	677794	624912	292592	588745	452290	593203	238026	408280	366624	428477	470113	654176	141632	334732
Q9UFN0	NIPSNAP3A	Protein NipSnap homolog 3A	9	505367	192017	630655	307692	687694	617216	280960	603773	542319	614378	266199	277474	329683	355467	504075	700802	231952	281470
Q86X76	NIT1	Deaminated glutathione amidase	7	217007	271076	345183	245460	345883	305821	204047	292744	272560	350904	193826	212410	217803	198771	207244	362504	219574	225547
Q9NQR4	NIT2	Omega-amidase NIT2	10	350136	435087	472155	386059	489170	459771	391066	573653	384565	482370	399000	391371	380407	381769	406496	526063	352053	354808
Q96D46	NMD3	60S ribosomal export protein NMD3	3	160740	186821	145592	135240	168216	153277	154401	139517	138333	161559	186821	165113	173687	137514	139434	144841	159942	114627
P15531-2	NME1	Isoform 2 of Nucleoside diphosphate kinase A	9	1.3045e+06	1.39029e+06	1.72757e+06	1.21702e+06	2.15478e+06	1.89548e+06	1.20012e+06	2.23729e+06	1.41307e+06	1.80466e+06	1.1285e+06	1.0726e+06	1.00491e+06	1.14775e+06	1.43326e+06	1.99915e+06	1.26698e+06	1.96133e+06
O60361	NME2P1	Putative nucleoside diphosphate kinase	7	896017	1.33848e+06	698353	1.25245e+06	632402	691049	1.12453e+06	682344	1.074e+06	662849	1.41244e+06	1.08516e+06	1.0591e+06	1.17703e+06	1.22099e+06	786469	1.24566e+06	1.07123e+06
Q13232	NME3	Nucleoside diphosphate kinase 3	1	118592	149780	241973	157538	279158	236703	142325	276597	170278	216408	205913	135728	201205	161764	197757	283911	157114	167298
Q9Y5B8	NME7	Nucleoside diphosphate kinase 7	4	115031	124644	107945	113072	105694	108136	125303	125240	111760	107305	129835	127547	117886	127181	115465	109493	128210	113165
Q13287	NMI	N-myc-interactor	7	284438	338947	268835	293625	207323	267731	321804	264935	279840	274358	392417	320471	309931	340205	255693	309190	307762	312127
Q96T66	NMNAT3	Nicotinamide/nicotinic acid mononucleotide adenylyltransferase 3	5	195209	227879	216408	236282	243564	215237	221690	236484	209979	234106	198018	435415	174603	341713	200529	274358	206438	176665
P30419	NMT1	Glycylpeptide N-tetradecanoyltransferase 1	12	221884	294929	252882	240245	260024	256709	264938	275290	246799	261794	277454	269096	233088	256911	264697	291445	256477	309216
Q13423	NNT	NAD(P) transhydrogenase, mitochondrial	26	538372	293234	935726	401574	582913	759210	364336	543050	492309	660808	366101	485709	399921	342682	476208	511039	277956	284259
Q15233	NONO	Non-POU domain-containing octamer-binding protein	6	179015	137517	154569	119959	182250	176140	144340	214653	127973	135240	116695	214621	106364	215955	144119	137752	125033	121931
P61916	NPC2	NPC intracellular cholesterol transporter 2	3	281134	240988	346267	289804	327501	404631	286063	464777	278258	406781	273424	341071	222855	288078	304721	421861	281318	272694
P55786	NPEPPS	Puromycin-sensitive aminopeptidase	27	1.05218e+06	1.10172e+06	1.75389e+06	1.20474e+06	1.86434e+06	1.569e+06	1.24509e+06	1.87349e+06	1.29433e+06	1.85537e+06	1.1366e+06	1.20187e+06	1.06962e+06	1.09708e+06	1.33862e+06	1.67544e+06	1.14266e+06	1.05883e+06
Q9BXD5	NPL	N-acetylneuraminate lyase	4	110999	119599	157008	98147.4	188810	179749	138103	161800	96167.6	148791	113026	132837	121483	122158	147666	166774	166331	127313
Q8TAT6-2	NPLOC4	Isoform 2 of Nuclear protein localization protein 4 homolog	13	231198	247354	345698	346787	380339	381648	234092	318611	360654	346787	242299	223532	279273	232147	313761	352979	237073	287258
P06748	NPM1	Nucleophosmin	4	987534	391506	701938	481279	589475	690486	345201	702727	506812	548482	383812	763950	453700	608119	615105	618057	276600	375510
P16083	NQO2	Ribosyldihydronicotinamide dehydrogenase [quinone]	2	87192.2	99810.6	85462.8	104052	53590.2	48574.2	105725	61246.5	70525.2	107945	73058.7	93992.8	71007.1	86374.3	78982.1	70794.9	79311.9	77383.6
P01111	NRAS	GTPase NRas	5	286257	231200	406781	242648	306679	389584	234399	400260	269656	373358	234879	242133	256332	220310	228990	420668	209828	247628
Q96F24	NRBF2	Nuclear receptor-binding factor 2	2	711031	1.08917e+06	182681	563216	170417	207708	1.11399e+06	187580	578825	206600	1.10306e+06	1.21673e+06	1.07979e+06	993181	620467	294796	1.18512e+06	1.47197e+06
Q9UHY1	NRBP1	Nuclear receptor-binding protein	8	446746	581314	508006	489617	563216	502801	550104	581586	502136	514218	577332	497750	504439	498161	625617	661285	526638	554494
O43847-2	NRDC	Isoform 2 of Nardilysin	12	923745	902585	580348	771822	605895	585812	863953	564622	714524	591676	1.05376e+06	869556	934700	801852	830209	688202	925874	983246
Q92686	NRGN	Neurogranin	2	33764.1	41006.5	42816.5	56400.3	44724.4	44724.4	37560.3	42558.8	71319.2	41655.9	41186.3	39054.5	27045.5	32105	22436.6	46429	30009.5	41660.3
Q15738	NSDHL	Sterol-4-alpha-carboxylate 3-dehydrogenase, decarboxylating	8	1.55614e+06	890827	540354	875357	536739	523189	1.07732e+06	528764	856562	487395	895330	1.06743e+06	1.38588e+06	1.32794e+06	873112	481036	990896	1.08693e+06
P46459	NSF	Vesicle-fusing ATPase	23	438893	286057	639425	394960	541824	611476	320776	556366	397078	543050	259432	359112	316514	318065	334905	441771	310107	357165
Q8TCD5	NT5C	5'(3')-deoxyribonucleotidase, cytosolic type	5	428307	404182	464777	346959	590577	679745	384141	654176	399566	683235	408042	460514	375215	412870	416394	649143	402012	380721
P49902	NT5C2	Cytosolic purine 5'-nucleotidase	7	99336.7	122825	149002	109031	143463	158178	114291	166847	132125	135292	119644	113580	109391	111108	143974	188215	122559	119198
Q9H0P0	NT5C3A	Cytosolic 5'-nucleotidase 3A	10	484815	467440	768661	483959	606883	741342	496899	677794	541048	699378	548995	511527	529960	509138	509482	722350	519653	520499
Q5TFE4	NT5DC1	5'-nucleotidase domain-containing protein 1	2	583746	659195	644421	366579	303687	533576	581895	329906	435677	335543	604895	586781	536868	582276	549164	675600	614203	560083
P53384	NUBP1	Cytosolic Fe-S cluster assembly factor NUBP1	3	159426	196260	235469	190421	263484	232820	172948	268162	222070	255813	179309	168820	199867	164271	192233	265521	187431	199867
Q9Y5Y2	NUBP2	Cytosolic Fe-S cluster assembly factor NUBP2	2	174508	148685	233593	173094	234597	253733	190362	137308	189387	239359	156732	149339	203516	183975	213444	168693	161091	166472
Q02818	NUCB1	Nucleobindin-1	9	288702	321724	193197	281513	232945	203251	292928	292624	249243	248006	273755	239057	251181	279258	250850	279050	287680	297861
P80303	NUCB2	Nucleobindin-2	12	314641	377226	689634	349666	655520	606883	410885	799594	371417	651584	379471	393675	329314	363687	468526	876620	424837	473484
Q9Y266	NUDC	Nuclear migration protein nudC	15	246955	278749	234692	256562	255693	227343	261211	233273	249997	246196	277362	277362	272126	269654	266821	268646	293175	297651
Q96RS6	NUDCD1	NudC domain-containing protein 1	5	289893	330779	252039	287971	215721	220709	311723	234356	296708	234356	271235	333148	303218	394173	266025	227343	323150	312519
Q8WVJ2	NUDCD2	NudC domain-containing protein 2	2	64530.2	76961.9	78887.6	73670.7	69938.7	81462.9	66604.4	94399.9	68853.2	79873.5	78987.4	68525.3	61505.5	70487.4	97125.4	85929.2	62435.1	68752.6
P36639	NUDT1	7,8-dihydro-8-oxoguanine triphosphatase	3	186797	151413	150022	169332	124424	131859	154802	153277	148130	127152	227794	198038	202654	202120	178432	224580	159975	260390
P50583	NUDT2	Bis(5'-nucleosyl)-tetraphosphatase [asymmetrical]	3	457848	549791	835536	512797	777447	1.0935e+06	450879	881291	569190	933851	613198	478983	560109	532428	500883	956721	420311	513794
O95989	NUDT3	Diphosphoinositol polyphosphate phosphohydrolase 1	5	218844	252376	265425	239981	276903	248524	240059	304504	254322	275190	233494	241503	226105	240842	223905	345531	228472	244735
Q9UKK9	NUDT5	ADP-sugar pyrophosphatase	8	209842	210919	266821	228990	269522	263353	246931	276130	239868	234807	207178	215555	189948	211997	217830	310583	228054	242521
Q9BW91	NUDT9	ADP-ribose pyrophosphatase, mitochondrial	1	211977	252619	205519	258620	186976	213976	227968	202637	199190	146500	203257	229550	221426	243006	173839	239868	255021	258562
P49757	NUMB	Protein numb homolog	4	380717	334876	131914	286811	267201	207244	396318	284841	435118	358391	375351	357196	378132	360110	327759	207708	336599	381572
P61970	NUTF2	Nuclear transport factor 2	2	270605	338621	272918	298745	286353	281817	246388	198330	275986	273234	270937	279384	236323	262652	308660	293538	289280	338621
Q9Y6K5	OAS3	2'-5'-oligoadenylate synthase 3	4	89551.5	135375	136824	107192	123822	141192	157772	108207	97549.3	130326	227618	126997	138628	111774	104628	78325.9	138261	114922
Q01968	OCRL	Inositol polyphosphate 5-phosphatase OCRL-1	1	63363.3	70533.3	36940.3	63345.6	37574.9	37363.3	69711.9	34350.1	56231.6	30055.5	60582.3	75758.6	76084.8	69789.1	54170.4	26970.1	76614.1	67243.5
O60502	OGA	Protein O-GlcNAcase	6	84026.4	141673	177079	119403	181731	178432	129673	159249	131554	160788	111861	111306	145382	85361.7	129537	182839	116919	144896
Q02218	OGDH	2-oxoglutarate dehydrogenase, mitochondrial	18	384654	257070	274358	217830	230552	324095	218195	203251	185844	257511	192724	260062	325198	253696	219770	213976	195247	212678
O15294	OGT	UDP-N-acetylglucosamine--peptide N-acetylglucosaminyltransferase 110 kDa subunit	2	70951.9	70715.9	60119.9	60683.2	61455.8	60382.1	64331	62804.1	59210.9	64164.7	68279.7	82628.5	60229.6	69173.7	60035.1	58360.9	64040.3	70897.2
Q9NTK5	OLA1	Obg-like ATPase 1	20	1.17868e+06	1.28592e+06	1.25719e+06	1.22326e+06	1.37573e+06	1.39197e+06	1.28321e+06	1.46388e+06	1.35338e+06	1.34925e+06	1.21365e+06	1.3215e+06	1.18335e+06	1.25424e+06	1.31532e+06	1.6895e+06	1.27633e+06	1.48081e+06
O60313-10	OPA1	Isoform 4 of Dynamin-like 120 kDa protein, mitochondrial	19	427623	431586	503202	432515	530890	552038	447433	426888	437751	528323	346881	470132	399638	428093	441771	388411	448022	384863
O60890	OPHN1	Oligophrenin-1	11	368143	273410	306117	284583	297791	301756	320785	226052	308005	323545	311417	268926	302577	296222	279510	203139	336878	275081
Q96CV9	OPTN	Optineurin	11	220890	250104	172402	191884	172965	150522	214418	133439	225502	161137	259944	242506	237371	335863	198596	148598	324201	271578
Q96D31	ORAI1	Calcium release-activated calcium channel protein 1	1	29783.9	9689.17	57634.5	29498.3	41835.8	39438.5	13727.1	66118.4	32296.5	53394.7	12164.6	15525	9978.56	15012.7	28710.8	42140.5	11716.4	16224
P02763	ORM1	Alpha-1-acid glycoprotein 1	8	2.98534e+06	3.2608e+06	506812	5.04201e+06	480646	630655	4.25811e+06	627283	3.10561e+06	489617	4.99938e+06	3.05738e+06	5.55048e+06	3.47089e+06	4.74186e+06	709832	4.25811e+06	3.33888e+06
P19652	ORM2	Alpha-1-acid glycoprotein 2	7	983465	1.14269e+06	287018	1.98107e+06	272027	310125	2.38835e+06	315765	1.05029e+06	274089	1.5056e+06	1.00767e+06	1.61448e+06	1.18493e+06	1.30496e+06	411699	1.533e+06	1.08326e+06
P22059	OSBP	Oxysterol-binding protein 1	15	739189	641790	813986	696685	813986	892548	699872	690486	716079	717000	713538	610877	647066	652625	687694	831985	712795	701444
Q9H1P3	OSBPL2	Oxysterol-binding protein-related protein 2	3	181380	206293	216836	175155	229712	232945	177144	231765	214489	207575	211236	202052	230705	234308	198726	206684	213102	238358
Q9BZF1	OSBPL8	Oxysterol-binding protein-related protein 8	11	103070	89379.8	114199	84486.4	103115	114398	82244.3	98477.7	85853.6	111566	91297.4	76458.8	90096.4	78173.3	85288.3	93789	88623.9	101033
Q96SU4-6	OSBPL9	Isoform 6 of Oxysterol-binding protein-related protein 9	2	139261	104547	178334	161137	199190	219106	101105	223503	181075	212718	105812	112325	127968	130268	148935	282889	116946	127126
Q9NPF4	OSGEP	Probable tRNA N6-adenosine threonylcarbamoyltransferase	2	96751.8	74723	85853.6	80031.6	91186	84772	73479	99366	88005.4	86794	85801.3	65158	109095	88599.5	76254.3	97482.9	78363.9	90194
Q92882	OSTF1	Osteoclast-stimulating factor 1	7	1.34246e+06	1.58434e+06	1.12453e+06	2.78445e+06	786469	943071	1.37507e+06	860810	1.68343e+06	1.02465e+06	1.45048e+06	1.74063e+06	1.3287e+06	1.46524e+06	892548	838738	1.43457e+06	1.51775e+06
Q96FW1	OTUB1	Ubiquitin thioesterase OTUB1	7	547522	707935	920203	628310	907753	913766	634306	888694	817420	894880	661096	705953	540732	644549	763631	892548	681670	684892
Q8N6M0	OTUD6B	Deubiquitinase OTUD6B	4	137039	141232	102299	131411	120203	109031	138175	137260	145543	127551	186034	158391	158903	159371	134724	145663	155809	169830
Q96BN8	OTULIN	Ubiquitin thioesterase otulin	8	176665	195357	166064	148791	175063	163573	184441	157171	166774	165764	178982	166787	177611	193696	162618	160603	186634	233851
P55809	OXCT1	Succinyl-CoA:3-ketoacid coenzyme A transferase 1, mitochondrial	14	409639	203380	570793	305821	552038	525559	261619	447560	407136	527732	296838	327979	318247	367502	393789	572344	218046	281901
Q8N573	OXR1	Oxidation resistance protein 1	10	324475	368666	265654	286110	239868	234692	348034	243881	333248	248447	377373	375845	356254	351725	354309	299871	372187	401296
O95747	OXSR1	Serine/threonine-protein kinaseR1	12	277830	303966	449926	285130	337754	426054	333005	400920	302867	363043	295483	290707	273763	309464	336274	445080	298868	305666
P51575	P2RX1	P2X purinoceptor 1	9	525213	333799	698781	474792	495586	704026	403281	730309	514029	683315	345713	395092	394233	347976	489652	534319	379362	451389
Q9H244	P2RY12	P2Y purinoceptor 12	2	114195	119963	127973	85782.1	118783	121107	81211.1	108939	95894.5	126651	81992.7	98986.1	80258.8	82477.3	104186	101973	109622	116997
Q32P28	P3H1	Prolyl 3-hydroxylase 1	11	131021	142605	211582	195022	241159	200914	180066	206899	179865	217207	147935	143794	146698	166701	161137	209399	154198	162486
P13674	P4HA1	Prolyl 4-hydroxylase subunit alpha-1	3	97074	94530.7	76051.4	78982.1	74965.2	82234.9	82144.6	81082.9	86452	76379.8	102828	90594.2	82410.6	89349.5	79407	81845.5	92865.8	113354
P07237	P4HB	Protein disulfide-isomerase	32	1.55073e+06	2.10604e+06	2.53368e+06	2.04467e+06	2.57063e+06	2.45176e+06	1.8988e+06	2.4812e+06	2.08143e+06	2.71306e+06	1.76725e+06	1.81636e+06	1.72267e+06	1.8988e+06	2.22733e+06	2.89354e+06	1.95294e+06	2.25955e+06
Q9UQ80	PA2G4	Proliferation-associated protein 2G4	14	1.09295e+06	1.1893e+06	765587	1.03409e+06	807856	802971	1.15675e+06	653802	1.35709e+06	727908	1.20601e+06	1.13206e+06	1.11402e+06	1.0936e+06	982232	796699	1.15675e+06	1.29796e+06
Q9BRP4	PAAF1	Proteasomal ATPase-associated factor 1	3	946476	774142	281960	630655	299871	295085	650348	392105	543900	274639	736482	677497	626131	432669	547292	399566	733398	590611
P11940	PABPC1	Polyadenylate-binding protein 1	18	1.69933e+06	1.79268e+06	2.89354e+06	2.23729e+06	3.10561e+06	2.91821e+06	1.53695e+06	4.74186e+06	2.329e+06	3.24457e+06	1.81465e+06	1.68026e+06	1.68546e+06	1.67395e+06	1.93025e+06	3.0423e+06	1.52896e+06	2.05784e+06
Q6VY07	PACS1	Phosphofurin acidic cluster sorting protein 1	20	339976	369270	450359	404277	471548	422824	355501	435118	397677	442824	373875	371181	350522	365684	441644	478146	374583	408898
Q9UNF0	PACSIN2	Protein kinase C and casein kinase substrate in neurons protein 2	14	287740	351502	384149	299608	352751	304051	301703	1.06429e+06	309920	327582	312669	324709	292981	328251	331419	598256	347350	334952
P43034	PAFAH1B1	Platelet-activating factor acetylhydrolase IB subunit alpha	14	711768	750493	785662	784793	867735	740053	806357	781577	788060	833042	701068	851732	666893	747377	735252	892542	818499	774797
P68402	PAFAH1B2	Platelet-activating factor acetylhydrolase IB subunit beta	2	370406	418751	532972	435454	501366	479210	422484	489170	449381	483959	431412	465068	356060	413083	414332	626037	377366	436828
Q15102	PAFAH1B3	Platelet-activating factor acetylhydrolase IB subunit gamma	1	426052	413208	569190	504897	565341	510198	453467	481787	512412	534042	410323	423695	416756	422400	449154	436436	544148	335063
P22234-2	PAICS	Isoform 2 of Multifunctional protein ADE2	15	806357	643666	913576	808445	845231	911708	546393	737500	873748	861035	661308	488259	937127	777317	795905	885867	743166	591891
Q9H074	PAIP1	Polyadenylate-binding protein-interacting protein 1	4	383954	534138	299156	350309	342148	292392	537768	263872	315765	307240	525092	507059	493153	455751	460790	296196	494191	567890
Q13177	PAK2	Serine/threonine-protein kinase PAK 2	14	1.13686e+06	1.18066e+06	1.84744e+06	1.25719e+06	1.68343e+06	1.67544e+06	1.15699e+06	1.37361e+06	1.42982e+06	1.63994e+06	1.14762e+06	1.20439e+06	1.14762e+06	1.59264e+06	1.25245e+06	1.71375e+06	1.14179e+06	1.17676e+06
O96013	PAK4	Serine/threonine-protein kinase PAK 4	3	366916	438249	193616	309809	197405	198726	424391	191213	277682	184901	414618	324375	345789	379113	263484	236703	392608	373962
Q504Q3	PAN2	PAN2-PAN3 deadenylation complex catalytic subunit PAN2	1	68702.5	75193.4	115379	60119.9	107039	94730.3	81627.4	75676.1	78675	102227	86940.4	88058.3	71445.9	77130.2	96693.7	105850	83071.9	80859.3
Q9BZ23	PANK2	Pantothenate kinase 2, mitochondrial	2	53667.4	83192.3	71653.2	69866.6	90363.6	78760.9	63629.3	62881.8	72088	80475.2	82752.3	73238.5	75759.8	57282.8	61562.2	80675.4	87194	76243.4
Q9NVE7	PANK4	Pantothenate kinase 4	4	179261	213122	268162	249350	264935	256796	197346	241014	241688	232168	204521	238801	226930	225374	217688	224879	230417	246327
Q6QHF9	PAOX	Peroxisomal N(1)-acetyl-spermine/spermidine oxidase	2	66434	43093.3	106468	104146	108335	99929.9	122306	99403.5	108472	115524	57438.7	41356.1	52844.1	66230.8	117440	93742.5	46679.3	54428.1
O43252	PAPSS1	Bifunctional 3'-phosphoadenosine 5'-phosphosulfate synthase 1	6	253897	195841	174629	197405	205189	223849	216632	198596	211036	203997	214839	198208	248862	219525	226470	200777	234298	200586
O95340-2	PAPSS2	Isoform B of Bifunctional 3'-phosphoadenosine 5'-phosphosulfate synthase 2	8	128371	157895	180390	149823	167328	235772	169806	171526	161045	188215	159211	127376	170326	144915	169103	216156	177748	145474
Q8TEW0-11	PARD3	Isoform 11 of Partitioning defective 3 homolog	16	243204	247278	286811	275588	282889	279347	248471	272665	284440	296584	267694	265974	235117	245427	264162	275858	293998	258946
Q99497	PARK7	Protein/nucleic acid deglycase DJ-1	12	494157	505604	532390	411699	509153	492309	492755	528323	472569	519275	497753	477557	502419	477557	446555	679745	493501	582232
Q8IXQ6	PARP9	Protein mono-ADP-ribosyltransferase PARP9	4	108335	111878	139638	107039	149474	140224	91358.9	131719	122443	151830	142230	109766	94999.1	83862.5	112071	117831	113844	81125.7
Q9HBI0	PARVG	Gamma-parvin	2	325659	372726	153599	122915	155517	115108	335671	111511	116091	131090	378259	333933	348419	354004	141712	142198	323513	298757
Q96IZ0	PAWR	PRKC apoptosis WT1 regulator protein	5	60393.7	63269.7	61078	54280.8	73835.1	55399.5	59795.5	43889.2	51416.7	62455.2	47949.8	46902.7	46902.7	48555.1	50929.5	78491.5	61054.9	58437
Q9BUH6	PAXX	Protein PAXX	4	313790	313310	399566	275858	376748	366394	285012	432515	297345	364921	245028	185971	338101	232318	293486	377850	239659	167150
Q9BVG4	PBDC1	Protein PBDC1	5	163088	210134	176910	159948	175846	172965	189036	149198	169332	165030	198945	199977	146739	168548	185658	168316	182739	195350
P30039	PBLD	Phenazine biosynthesis-like domain-containing protein	2	124737	108582	161559	92451.3	152299	151918	118102	155777	127264	162618	108062	139862	112171	134839	180261	146346	116447	131832
P61457	PCBD1	Pterin-4-alpha-carbinolamine dehydratase	1	42793.2	54585.1	52570	65721.9	55592	47943.8	53135.7	40966.5	58918.9	52118.3	45419.7	44339.6	45233.7	52515.7	67124	63885.1	50141.5	47185.9
Q15365	PCBP1	Poly(rC)-binding protein 1	13	386305	466383	550164	394627	543425	529211	511862	598580	440288	577675	522102	465549	415935	430293	529211	617216	504379	496896
P05166-2	PCCB	Isoform 2 of Propionyl-CoA carboxylase beta chain, mitochondrial	5	124064	25640.5	114118	106019	110895	107908	62722.8	96859.3	87448.8	110473	28686.3	62722.8	11237.7	25640.5	81233.4	95040	18258.1	11237.7
P22061-2	PCMT1	Isoform 2 of Protein-L-isoaspartate(D-aspartate) O-methyltransferase	12	486270	527111	633330	553762	661873	628310	498637	753063	552038	632901	484472	531782	471336	495690	522547	819029	519375	573887
Q8WW12	PCNP	PEST proteolytic signal-containing nuclear protein	3	186859	254637	130927	218174	139638	117282	183642	134215	177874	142358	206562	189284	202970	264148	147544	131969	201532	252374
Q15113	PCOLCE	Procollagen C-endopeptidase enhancer 1	3	50455.5	42979.6	28293	46928.9	34263.2	31465.7	36894	44252.2	43317	36101.2	44489.1	37595	48053.3	35905.5	42257.4	37268.9	53519.2	34501.1
Q9UKL6	PCTP	Phosphatidylcholine transfer protein	6	231487	255216	209979	225099	198875	205398	252113	201655	234356	197192	251266	254521	229057	245346	239683	188329	281694	281886
Q9UHG3	PCYOX1	Prenylcysteine oxidase 1	7	488097	407079	321808	386354	314044	320047	415593	301927	404277	262553	449401	346982	460683	392379	415079	322268	415932	346781
Q8NBM8	PCYOX1L	Prenylcysteine oxidase-like	10	559646	599676	566695	517949	577912	623071	549984	811243	549164	531484	568031	506232	538704	542558	512412	620947	650355	840560
P12955	PD	Xaa-Pro dipeptidase	7	218536	294385	316647	262868	334654	329471	285917	372550	258927	340227	283298	268971	243599	231346	283877	301325	276773	311914
Q13442	PDAP1	28 kDa heat- and acid-stable phosphoprotein	5	181457	197433	196649	153690	183994	168934	169856	155426	155959	168216	173297	166679	155103	152697	156052	189268	165213	183379
Q9BUL8	PDCD10	Programmed cell death protein 10	8	707778	819479	1.04788e+06	782903	1.10469e+06	1.01224e+06	777977	1.04535e+06	811243	993109	693774	768820	700365	716440	735337	1.23931e+06	814167	799293
Q53EL6	PDCD4	Programmed cell death protein 4	4	291504	278707	300355	277453	344925	316462	299256	354881	281655	328803	298627	232316	373432	271644	292242	325307	360362	247529
O14737	PDCD5	Programmed cell death protein 5	5	400109	506259	272319	395942	282476	300875	433755	354309	346267	313255	486080	422526	440852	432794	325761	316135	427392	564722
O75340	PDCD6	Programmed cell death protein 6	6	600631	605255	831017	743091	958532	899824	634400	704491	850144	805539	631488	609777	612370	629025	742234	813986	587574	659306
Q8WUM4	PDCD6IP	Programmed cell death 6-interacting protein	36	1.22624e+06	1.30857e+06	1.6895e+06	1.2345e+06	1.78378e+06	1.76725e+06	1.29009e+06	1.98107e+06	1.5111e+06	2.08143e+06	1.27047e+06	1.4273e+06	1.20013e+06	1.23169e+06	1.43675e+06	1.63336e+06	1.29309e+06	1.24606e+06
Q9H2J4	PDCL3	Phosducin-like protein 3	2	114506	163119	170103	151712	161045	160861	134045	167003	151639	175445	167711	147220	154431	144317	173296	189884	159519	161841
Q6L8Q7	PDE12	2',5'-phosphodiesterase 12	2	349839	352306	549164	429749	578425	590130	386249	685419	458709	556366	372779	323557	396531	341641	400920	573653	357081	316790
O00408	PDE2A	cGMP-dependent 3',5'-cyclic phosphodiesterase	6	143848	167702	163844	186700	171268	173162	225575	200436	190421	150855	173253	167702	162220	194580	201096	148492	160336	112805
Q14432	PDE3A	cGMP-inhibited 3',5'-cyclic phosphodiesterase A	9	145807	138733	203731	162336	197486	175694	141792	235469	164510	202156	153542	132168	159289	135100	166136	212414	140600	134116
O76074	PDE5A	cGMP-specific 3',5'-cyclic phosphodiesterase	36	988982	1.06998e+06	1.63994e+06	1.17974e+06	2.20368e+06	1.60975e+06	1.13007e+06	1.48238e+06	1.25245e+06	1.62087e+06	974542	958418	1.0121e+06	1.10277e+06	1.33626e+06	1.28405e+06	1.16956e+06	885340
O43924	PDE6D	Retinal rod rhodopsin-sensitive cGMP 3',5'-cyclic phosphodiesterase subunit delta	1	119370	140487	103176	112761	109132	109670	102004	123598	107737	109832	138868	106849	103129	93423.8	96011.6	135714	113071	130560
P04085	PDGFA	Platelet-derived growth factor subunit A	4	60962.4	56305.9	65907.4	76534.8	110788	90888.2	71435.2	157248	76056.9	134017	56347	50938	69490.2	59445	66365.9	110699	61368.4	64574.6
P01127	PDGFB	Platelet-derived growth factor subunit B	2	97354.5	119046	124534	97417.4	199439	125999	80825.5	188580	124488	284226	130763	92378.7	92734.9	117187	94465.1	216308	97572	126397
Q9NRA1	PDGFC	Platelet-derived growth factor C	1	74676.2	76839.8	98674.9	121868	155777	132520	114473	144707	109429	153059	67749.8	100713	86897.9	95466	70794.9	139230	105052	88793.2
Q9GZP0	PDGFD	Platelet-derived growth factor D	2	108532	115947	113736	96167.6	161137	154326	115596	180465	141712	247428	103552	102816	110940	117570	164228	174798	129586	148647
P08559-4	PDHA1	Isoform 4 of Pyruvate dehydrogenase E1 component subunit alpha, somatic form, mitochondrial	12	366588	149991	361488	219983	320349	351605	185246	299026	238394	385740	139367	199020	173935	197442	249243	342760	140552	156641
P30101	PDIA3	Protein disulfide-isomerase A3	31	6.08669e+06	5.80953e+06	3.81938e+06	5.15052e+06	3.96204e+06	3.78106e+06	6.08669e+06	4.11849e+06	5.31154e+06	4.07841e+06	4.98463e+06	6.08669e+06	4.53917e+06	5.67522e+06	6.06176e+06	3.81938e+06	5.86014e+06	7.09268e+06
P13667	PDIA4	Protein disulfide-isomerase A4	31	1.60202e+06	1.60827e+06	1.43675e+06	1.57832e+06	1.55436e+06	1.52465e+06	1.57265e+06	1.74135e+06	1.57832e+06	1.51972e+06	1.54527e+06	1.70316e+06	1.74272e+06	2.0568e+06	1.569e+06	1.95556e+06	1.55479e+06	1.72725e+06
Q14554	PDIA5	Protein disulfide-isomerase A5	23	1.25189e+06	1.57068e+06	879498	1.16078e+06	1.01687e+06	1.00284e+06	1.39368e+06	1.16337e+06	988482	672458	1.23855e+06	1.1311e+06	1.29763e+06	1.02241e+06	1.41307e+06	1.06714e+06	1.26796e+06	1.42443e+06
Q15084-2	PDIA6	Isoform 2 of Protein disulfide-isomerase A6	16	1.04682e+06	1.08563e+06	1.15448e+06	1.35709e+06	1.38002e+06	1.30496e+06	1.42754e+06	1.45607e+06	1.22681e+06	1.31243e+06	1.11332e+06	1.26056e+06	1.0008e+06	1.24295e+06	1.2972e+06	1.35709e+06	1.28036e+06	1.2149e+06
Q15118	PDK1	[Pyruvate dehydrogenase (acetyl-transferring)] kinase isozyme 1, mitochondrial	5	282268	96876.7	231009	133441	241130	267705	116646	267884	181441	252679	122961	198987	158387	218844	211574	264097	114503	151419
Q15120-2	PDK3	Isoform 2 of [Pyruvate dehydrogenase (acetyl-transferring)] kinase isozyme 3, mitochondrial	8	380687	184145	399014	264517	420668	381374	178275	380615	320349	380101	191684	184446	259519	294684	299156	366579	192556	172978
O00151	PDLIM1	PDZ and LIM domain protein 1	17	1.81923e+06	1.63358e+06	2.79994e+06	1.76725e+06	2.4812e+06	2.49793e+06	1.71404e+06	2.12792e+06	1.76144e+06	3.06666e+06	1.58378e+06	1.61161e+06	1.67242e+06	1.74325e+06	1.65494e+06	2.329e+06	1.68731e+06	1.92186e+06
Q96HC4	PDLIM5	PDZ and LIM domain protein 5	14	647178	599171	778826	687005	736317	745634	469009	637518	741342	746741	538919	606660	748429	631949	746741	707789	556516	735617
Q6P996	PDXDC1	Pyridoxal-dependent decarboxylase domain-containing protein 1	5	181520	137715	161137	149437	164644	147270	147716	122537	141258	190244	171853	140547	159086	165859	142198	122683	170366	153287
O00764	PDXK	Pyridoxal kinase	2	41418.8	31863.6	30860.6	45369.8	28335.4	31982	33463.7	36658.1	42507.6	32382.5	33498.9	36667.9	36850.4	32075.9	40155.2	35362.2	32260.4	28965.7
Q96GD0	PDXP	Pyridoxal phosphate phosphatase	2	200241	201560	114614	200700	108482	120061	220391	106446	174798	129796	246321	166914	256269	241799	196999	109832	229031	228756
P02776	PF4	Platelet factor 4	6	1.69701e+06	2.22157e+06	1.45607e+06	1.84744e+06	2.6308e+06	1.9231e+06	1.64058e+06	2.91821e+06	1.93025e+06	2.35711e+06	1.75583e+06	1.70983e+06	1.68776e+06	1.95461e+06	1.67544e+06	3.63366e+06	1.79177e+06	2.43503e+06
P10720	PF4V1	Platelet factor 4 variant	5	120501	178456	113072	132045	168934	151601	165571	243430	151918	186021	165491	178456	134673	152025	118364	358890	182162	200144
O15067	PFAS	Phosphoribosylformylglycinamidine synthase	11	156122	197578	189566	168552	200067	203139	162584	202431	173039	198596	183136	182564	173571	190824	186976	229982	175307	225088
O60925	PFDN1	Prefoldin subunit 1	3	193236	221140	178827	199020	213761	185067	203147	224433	191685	194901	214261	212393	189963	208091	180647	216408	215626	233079
Q9UHV9	PFDN2	Prefoldin subunit 2	3	140216	148557	166330	134371	156052	163152	147326	167901	142358	164510	135052	119904	128670	178529	166847	200247	141607	127146
Q9NQP4	PFDN4	Prefoldin subunit 4	3	208532	227191	237270	269656	246090	251384	211865	269656	259462	243881	218294	214144	197010	269472	242999	290848	253563	264961
Q99471	PFDN5	Prefoldin subunit 5	5	160684	169007	139837	155466	128979	130326	180501	137102	138684	141870	178797	156949	147069	165265	130200	181075	168367	152199
O15212	PFDN6	Prefoldin subunit 6	5	568369	770355	324782	583956	307692	330273	680950	404631	519996	311885	766662	824690	526495	648655	392105	405216	779951	848328
Q16875-4	PFKFB3	Isoform 4 of 6-phosphofructo-2-kinase/fructose-2,6-bisphosphatase 3	1	68205.7	124718	105392	98371.9	120116	105772	73512.7	93600.1	96324.6	94465.1	108026	110001	73438.1	76447.7	97904.9	102299	110573	80960.7
P17858	PFKL	ATP-dependent 6-phosphofructokinase, liver type	19	638936	695970	807856	793821	824551	770868	716953	617216	796699	712747	643593	747945	694814	701817	708914	778212	702851	601418
P08237-3	PFKM	Isoform 3 of ATP-dependent 6-phosphofructokinase, muscle type	10	397461	410674	379489	413621	345183	371747	453973	399566	406781	396823	372085	344491	372652	349666	374224	440694	344491	306016
Q01813	PFKP	ATP-dependent 6-phosphofructokinase, platelet type	29	1.44256e+06	1.86674e+06	2.57063e+06	1.5461e+06	1.89548e+06	2.22733e+06	1.45654e+06	1.88809e+06	1.70821e+06	1.41307e+06	1.64272e+06	1.48078e+06	1.29016e+06	1.62312e+06	1.50543e+06	1.34421e+06	1.74524e+06	1.34413e+06
P07737	PFN1	Profilin-1	10	3.13357e+06	3.52211e+06	2.20368e+06	2.84839e+06	2.03788e+06	1.99915e+06	3.29954e+06	2.11639e+06	2.84839e+06	2.06804e+06	3.37689e+06	3.37689e+06	2.85983e+06	3.4416e+06	2.89354e+06	2.98427e+06	3.29954e+06	3.99358e+06
P18669	PGAM1	Phosphoglycerate mutase 1	10	914747	1.11491e+06	1.03898e+06	878299	1.17137e+06	1.12141e+06	923216	1.27666e+06	983710	1.06429e+06	1.04865e+06	1.08533e+06	830030	1.03227e+06	909665	1.36246e+06	948448	1.30679e+06
Q96HS1	PGAM5	Serine/threonine-protein phosphatase PGAM5, mitochondrial	6	144357	144994	238043	197192	238043	293181	203132	282242	177184	260503	116769	218534	133158	121370	182009	232441	246615	174973
P52209	PGD	6-phosphogluconate dehydrogenase, decarboxylating	20	562481	698326	822038	661285	930522	868318	595179	922103	722350	927404	718331	696398	652054	726021	640050	899824	673618	697298
P00558	PGK1	Phosphoglycerate kinase 1	28	3.0423e+06	3.46746e+06	3.51818e+06	3.06666e+06	3.08546e+06	2.96418e+06	3.42744e+06	4.07841e+06	3.17206e+06	3.96204e+06	3.56633e+06	3.46746e+06	2.83183e+06	3.22723e+06	3.06666e+06	4.50457e+06	3.27793e+06	3.27793e+06
O95336	PGLS	6-phosphogluconolactonase	11	496730	682004	595310	705961	604309	617716	710026	478146	617216	595310	780020	711256	760096	683293	590577	500883	847796	702500
Q96PD5-2	PGLYRP2	Isoform 2 of N-acetylmuramoyl-L-alanine amidase	5	537974	626556	225502	493755	219983	224580	606420	303859	383561	248794	526980	490719	590873	526410	419472	278781	603005	539406
P36871	PGM1	Phosphoglucomutase-1	26	1.4408e+06	2.11529e+06	1.09636e+06	1.6154e+06	1.42605e+06	1.26766e+06	2.08328e+06	1.4758e+06	1.58797e+06	1.43675e+06	1.71305e+06	1.64428e+06	1.70634e+06	1.80698e+06	1.86434e+06	1.3885e+06	1.83959e+06	1.53197e+06
Q96G03	PGM2	Phosphoglucomutase-2	23	691036	795141	1.02709e+06	786469	856562	962115	667770	968072	831017	862310	675256	659451	670897	616739	813986	914891	646536	563183
Q6PCE3	PGM2L1	Glucose 1,6-bisphosphate synthase	11	1.25136e+06	1.04039e+06	490380	1.19657e+06	615105	663429	1.12634e+06	605188	927404	612744	1.16402e+06	949356	1.23803e+06	1.05638e+06	894880	608333	945468	968998
A6NDG6	PGP	Glycerol-3-phosphate phosphatase	7	477580	627078	311260	424472	269837	306300	532212	239198	332773	282670	523984	497263	483311	476163	457813	248006	615684	651804
O00264	PGRMC1	Membrane-associated progesterone receptor component 1	8	511562	285235	774761	362504	555955	763631	410294	847284	493354	663429	303599	371059	386883	373659	422372	835536	344301	365112
O15173-2	PGRMC2	Isoform 2 of Membrane-associated progesterone receptor component 2	5	274036	132534	286110	238659	281513	300018	201342	285617	255497	300355	162040	217669	221549	183548	243177	319908	151456	207481
P35232	PHB	Prohibitin	11	710396	829059	2.68323e+06	1.20251e+06	1.45942e+06	1.88375e+06	1.14924e+06	1.5238e+06	1.23263e+06	2.43617e+06	2.55748e+06	1.30807e+06	1.86725e+06	1.18988e+06	1.56984e+06	1.20745e+06	692064	2.04912e+06
Q99623	PHB2	Prohibitin-2	10	771173	590476	988482	469551	670827	807856	707616	531484	543425	835536	456973	596982	617659	506912	480646	624216	488849	514662
P46019	PHKA2	Phosphorylase b kinase regulatory subunit alpha, liver isoform	5	80526.4	100891	128901	119591	134796	118783	98002.4	129796	114951	120941	101685	100227	103030	90446.3	121909	116947	97400.1	99675.3
Q93100	PHKB	Phosphorylase b kinase regulatory subunit beta	4	135673	134253	320349	173687	336100	292242	184614	270551	203442	305006	146423	152397	142632	162405	285213	223003	162405	134620
P15735	PHKG2	Phosphorylase b kinase gamma catalytic chain, liver/testis isoform	2	131503	144233	191423	174798	174900	171989	199533	139913	169228	171729	160007	139513	183527	192392	230822	169012	135600	127075
Q8IUZ5	PHYKPL	5-phosphohydroxy-L-lysine phospho-lyase	1	89071.5	122819	157538	182250	253733	88603.1	106742	62301.4	86899	185185	89545.4	102811	80042	107522	78491.5	77573.7	88062.3	84312.9
P42356	PI4KA	Phosphatidylinositol 4-kinase alpha	24	304500	338417	309809	350904	326334	318611	449312	284741	318184	274942	302727	329266	301620	343634	346959	241159	335358	276125
Q8WXW3	PIBF1	Progesterone-induced-blocking factor 1	1	67856.7	97017.9	27891.6	105850	27081.5	28827.2	123760	27468.7	79821.9	24510.3	142837	69492.5	133298	94324.5	124227	38574.4	88059.1	55601.9
Q13492	PICALM	Phosphatidylinositol-binding clathrin assembly protein	9	298187	273191	298009	309647	308005	318184	350279	336100	276732	309468	261033	267704	331572	282193	294588	301927	329326	243503
P01833	PIGR	Polymeric immunoglobulin receptor	1	97188.4	87219.8	50929.5	143037	56017.1	53532.4	111191	59934.2	104052	49696.5	94421.5	94033.7	143401	145264	159605	62881.8	92854.9	108587
Q9NWS0	PIH1D1	PIH1 domain-containing protein 1	3	28711.7	28711.7	64847.3	55932.7	66194.6	73902.2	65510.2	63885.1	55399.5	67684.9	46648.4	28711.7	28711.7	28711.7	51310.3	62550	81608.4	28711.7
Q8NEB9	PIK3C3	Phosphatidylinositol 3-kinase catalytic subunit type 3	1	79783.4	87825.8	124930	51283.3	99394.8	130624	90349.8	82346	94712.8	106153	73362.6	87151.1	70563.3	79863.2	84445.6	87602.6	90926.2	78596.3
P42338	PIK3CB	Phosphatidylinositol 4,5-bisphosphate 3-kinase catalytic subunit beta isoform	19	670536	706077	511282	610018	542319	472155	661389	497367	583956	449926	637414	1.04623e+06	624852	637414	565341	418720	742038	609797
P48736	PIK3CG	Phosphatidylinositol 4,5-bisphosphate 3-kinase catalytic subunit gamma isoform	20	315593	343343	314653	332404	364921	370281	300796	264517	361071	304051	331211	330498	335180	323104	314222	269008	315818	352056
P27986-4	PIK3R1	Isoform 4 of Phosphatidylinositol 3-kinase regulatory subunit alpha	14	292335	309837	268577	267201	320047	256191	268176	287654	258036	287768	278919	279275	283475	248264	265654	243780	303644	312449
Q99570	PIK3R4	Phosphoinositide 3-kinase regulatory subunit 4	4	200533	183273	221608	209399	236103	183994	171900	169890	204567	201333	176139	165026	156366	168016	201466	138417	156224	170095
Q5UE93	PIK3R6	Phosphoinositide 3-kinase regulatory subunit 6	6	171071	230779	200067	210457	229547	188901	193686	186245	237389	169332	198360	185747	195353	190010	200777	152299	205977	158463
Q13526	PIN1	Peptidyl-prolyl cis-trans isomerase NIMA-interacting 1	3	551743	654330	442824	573653	388138	451446	613848	431640	523189	441081	556064	1.00247e+06	523549	530554	523742	499053	548228	557295
Q9Y237-2	PIN4	Isoform 2 of Peptidyl-prolyl cis-trans isomerase NIMA-interacting 4	2	381783	456611	240381	478610	234807	260782	367546	160788	381648	181350	458293	384491	488546	410200	658849	311990	419519	395484
P48426	PIP4K2A	Phosphatidylinositol 5-phosphate 4-kinase type-2 alpha	13	236854	330923	382935	338984	415632	381165	351284	359436	329747	394342	304402	289480	360421	291365	333248	493755	302149	277802
Q8TBX8	PIP4K2C	Phosphatidylinositol 5-phosphate 4-kinase type-2 gamma	5	120433	172598	153277	186976	192311	171268	177806	145865	162551	158239	220361	178121	159265	188644	176140	173039	187358	207173
Q8N4L2	PIP4P2	Type 2 phosphatidylinositol 4,5-bisphosphate 4-phosphatase	4	84847.8	104609	78826.8	123351	65510.2	91994.3	128363	63615.5	112499	76254.3	128363	120515	90393.3	95004.1	101888	57224.6	170005	163292
O60331-3	PIP5K1C	Isoform 3 of Phosphatidylinositol 4-phosphate 5-kinase type-1 gamma	2	345492	1.01852e+06	153059	416015	151179	142609	645838	144841	248794	162776	686002	426882	507942	409094	284841	180759	424729	472989
Q9GZP4	PITHD1	PITH domain-containing protein 1	7	176896	205800	201953	175362	202541	211674	201339	217207	195022	204476	194380	175089	178758	183015	169623	231765	229710	207419
Q00169	PITPNA	Phosphatidylinositol transfer protein alpha isoform	9	197814	259842	307692	193359	280835	288502	192462	254521	199964	281960	221442	209808	201689	199032	225335	320657	212301	205701
P48739-3	PITPNB	Isoform 3 of Phosphatidylinositol transfer protein beta isoform	13	325143	402304	445298	384565	510198	480213	394631	349534	408814	510562	417851	440852	399168	373804	455617	455277	402304	450361
Q9UKF7	PITPNC1	Cytoplasmic phosphatidylinositol transfer protein 1	5	248758	432322	413975	315057	412004	363596	506182	395380	380912	395136	224281	292898	375815	365045	311617	399883	388119	201079
Q9BZ72	PITPNM2	Membrane-associated phosphatidylinositol transfer protein 2	11	338510	335138	383561	292057	365683	350309	293643	387866	311260	400260	310283	298108	398487	331512	315121	339784	353643	289330
Q5JRX3-2	PITRM1	Isoform 2 of Presequence protease, mitochondrial	9	220921	89844.3	179749	146708	262992	191366	76543.5	247917	180759	237914	182239	213876	201771	137016	158239	260503	83075.4	130115
P98161	PKD1	Polycystin-1	1	45746.5	47145.8	137598	50903.5	172337	74598.6	89919.2	78145.7	69600.1	136887	63357.6	53220.3	64286.5	44421.5	66525.6	66118.5	53978.3	41418.8
Q86WI1	PKHD1L1	Fibrocystin-L	16	397884	299739	334267	366128	318985	385740	387868	371417	350690	343884	285641	329876	345621	393720	330627	378076	291138	308056
P30613	PKLR	Pyruvate kinase PKLR	3	26907.3	28668.6	98642.8	101942	110266	106987	101002	97207.2	107889	88743.9	28668.6	16384.3	30109.6	87606.5	88316.6	119647	22497.8	19589.2
Q16512-2	PKN1	Isoform 2 of Serine/threonine-protein kinase N1	11	324851	307083	301149	329278	327582	303859	295358	276732	314044	307824	357972	276920	383971	331929	331055	305142	302535	295165
P47712	PLA2G4A	Cytosolic phospholipase A2	16	375335	431354	433992	455277	438344	407321	405308	417401	412134	463209	408219	388577	421330	346254	438722	439090	441688	407701
Q9Y263	PLAA	Phospholipase A-2-activating protein	19	328469	359053	358106	373993	381374	392805	410422	386671	378716	379489	352443	377315	355090	347572	377318	353566	386033	325430
Q00722	PLCB2	1-phosphatidylinositol 4,5-bisphosphate phosphodiesterase beta-2	33	937138	730415	803782	646599	882645	760594	736104	764944	703896	716079	731417	631006	895112	711128	643363	774761	728236	818968
Q01970	PLCB3	1-phosphatidylinositol 4,5-bisphosphate phosphodiesterase beta-3	20	287188	326391	434788	353867	486150	387032	314545	406316	343278	437255	321796	308911	290301	331202	333495	415079	345203	326891
Q15147-4	PLCB4	Isoform 3 of 1-phosphatidylinositol 4,5-bisphosphate phosphodiesterase beta-4	8	129710	151760	143373	192145	173839	138417	168520	185067	181890	177625	129847	132385	147180	147926	150990	182150	151888	159715
P16885	PLCG2	1-phosphatidylinositol 4,5-bisphosphate phosphodiesterase gamma-2	32	905735	906927	786469	864043	852284	852284	1.04707e+06	857935	905839	852284	1.04583e+06	972155	985841	909538	1.03105e+06	815319	1.01718e+06	931510
Q4KWH8	PLCH1	1-phosphatidylinositol 4,5-bisphosphate phosphodiesterase eta-1	1	2.29275e+06	2.46804e+06	6.20357e+06	3.32959e+06	5.80322e+06	5.31154e+06	2.57967e+06	1.01224e+06	4.23191e+06	4.56781e+06	2.39112e+06	2.43411e+06	2.03019e+06	2.38271e+06	3.72083e+06	2.15478e+06	2.55072e+06	2.86583e+06
P08567	PLEK	Pleckstrin	13	820085	1.11611e+06	1.77555e+06	1.27363e+06	1.7614e+06	1.67012e+06	286201	1.66525e+06	1.30724e+06	1.45778e+06	1.14924e+06	294385	1.11611e+06	1.10415e+06	1.35597e+06	2.86621e+06	911193	1.13376e+06
Q9H8W4	PLEKHF2	Pleckstrin homology domain-containing family F member 2	8	330698	359214	341531	470984	504116	280107	361587	272899	367036	436809	349892	335565	344163	318349	321820	289595	346462	358757
Q8TD55	PLEKHO2	Pleckstrin homology domain-containing family O member 2	16	304661	376122	419354	378165	412606	418635	416837	416690	442556	472895	420748	337577	430467	366869	440059	442556	336164	365045
P00747	PLG	Plasminogen	38	2.95905e+06	2.73754e+06	2.98427e+06	2.94705e+06	2.06804e+06	2.57063e+06	3.10547e+06	2.68534e+06	3.13492e+06	2.29456e+06	3.06844e+06	2.52117e+06	3.65641e+06	2.79934e+06	2.46712e+06	2.5935e+06	2.95905e+06	2.66462e+06
O60664	PLIN3	Perilipin-3	15	319703	321658	365683	340907	374814	392553	332648	429749	370051	371026	325588	300757	326081	304263	362201	427855	328851	318717
Q02809-2	PLOD1	Isoform 2 of Procollagen-lysine,2-oxoglutarate 5-dioxygenase 1	3	156966	107840	189884	133439	190799	181731	115457	182957	130608	180916	129160	90246.3	149606	167800	136904	171268	120849	99939.5
O60568	PLOD3	Multifunctional procollagen lysine hydroxylase and glycosyltransferase LH3	5	78377	86111.2	113940	118254	128695	129436	90499.8	124194	108669	138554	94940.7	76734.1	99644.6	84785	108144	137623	76152.2	85647.2
Q04941	PLP2	Proteolipid protein 2	1	79823.4	65495.6	106446	74965.2	81555.6	78675	101863	82668.4	82406.2	87199.2	60306.3	81411.1	77327.9	67964.6	76580	90877.2	67681.7	84449.5
O94903	PLPBP	Pyridoxal phosphate homeostasis protein	6	243031	335434	291257	301149	301149	297604	341720	335132	340606	318359	230441	308150	314242	362661	320657	371417	283557	372502
P13797	PLS3	Plastin-3	22	402095	450630	433463	456966	649738	531484	472278	518837	485194	516789	437430	400484	510001	404637	530418	496067	408691	434973
O15162	PLSCR1	Phospholipid scramblase 1	1	312211	259972	312469	303290	247428	312164	273642	262714	213761	283417	309064	239828	180395	187860	214060	227123	211257	257453
P55058	PLTP	Phospholipid transfer protein	3	201006	180203	124055	152299	96623.6	112499	158385	114310	159154	110121	177715	183170	222740	160766	194256	144218	168616	137305
Q6UX71	PLXDC2	Plexin domain-containing protein 2	11	325665	264373	237580	257197	257392	254700	297008	247156	232168	261174	251078	253744	308532	282913	207575	269944	273336	278248
Q9ULL4-2	PLXNB3	Isoform 2 of Plexin-B3	16	214138	184389	171729	182839	156354	186654	192647	177874	194716	176235	181927	181156	203990	205965	207708	163573	172982	223277
O15305	PMM2	Phosphomannomutase 2	7	125023	112392	118431	114951	153860	113072	104260	124895	121466	130200	106572	121081	103251	112152	120116	129117	120582	157596
Q15126	PMVK	Phosphomevalonate kinase	8	238538	282753	281655	280835	289644	274089	276211	230205	269944	286697	296407	289976	260554	282362	279711	270551	275520	277141
Q8N490	PNKD	Probable hydrolase PNKD	5	70258.4	83390.7	110019	80596.3	113651	131653	75538.5	116861	99970.7	113072	63303.5	90818.9	93994.3	96720.4	93600.1	85014.2	92652	68064.8
Q8ND90	PNMA1	Paraneoplastic antigen Ma1	3	186574	248293	124312	182421	139837	145176	234473	131809	167150	172864	210150	204766	218017	196234	176068	141870	210590	221228
P00491	PNP	Purine nucleoside phosphorylase	17	1.69925e+06	1.71223e+06	1.27666e+06	1.67544e+06	1.29433e+06	1.26313e+06	1.57554e+06	1.30496e+06	1.59557e+06	1.17137e+06	1.59212e+06	1.80169e+06	1.8122e+06	2.13761e+06	1.4758e+06	1.89548e+06	1.79481e+06	1.73415e+06
P27169	PON1	Serum paraoxonase/arylesterase 1	10	2.09094e+06	1.61957e+06	245959	1.70821e+06	220391	258206	1.61587e+06	214170	1.27043e+06	202541	1.72924e+06	1.6275e+06	3.10783e+06	1.84744e+06	1.59557e+06	299405	1.61118e+06	967423
Q15165	PON2	Serum paraoxonase/arylesterase 2	5	97385	79828.7	138203	125490	132882	140020	97583.3	117388	123351	122596	89424.3	85672.8	93043.3	93357.6	122208	103689	89070.6	84069
P0CG39	POTEJ	POTE ankyrin domain family member J	8	110692	158387	160453	108374	148986	128710	145741	101983	150645	125141	121149	135081	109828	124937	156325	80890.2	157729	138277
Q15181	PPA1	Inorganic pyrophosphatase	10	452848	658037	697068	641279	841431	713823	743166	774977	595567	774977	752441	648008	881030	814344	612934	875241	675781	579134
Q9H2U2-2	PPA2	Isoform 2 of Inorganic pyrophosphatase 2, mitochondrial	12	389781	195022	387866	299156	404952	372599	251799	363290	350904	382814	243161	300198	288057	357741	351605	447972	207941	275031
Q06203	PPAT	Amidophosphoribosyltransferase	3	155296	159081	176235	171810	195627	185920	174689	249243	206493	174798	176213	146624	167471	165108	167378	225235	186643	162889
P02775	PPBP	Platelet basic protein	8	1.11233e+07	1.49002e+07	3.4729e+06	1.39819e+07	8.8752e+06	1.04277e+07	1.44492e+07	1.58842e+07	2.16378e+07	1.23625e+07	1.21014e+07	1.44492e+07	1.11233e+07	1.34457e+07	1.04277e+07	1.58842e+07	1.29688e+07	1.58076e+07
Q96CD2	PPCDC	Phosphopantothenoylcysteine decarboxylase	3	99649.7	145165	189701	94399.9	170721	162096	111088	130376	115108	175362	112341	107051	127864	103655	155131	175296	115493	142156
Q9HAB8	PPCS	Phosphopantothenate--cysteine ligase	9	358352	441940	420355	432042	406316	409829	424127	420668	415079	416676	478402	414478	443743	436058	419732	516490	546208	455466
Q13136	PPFIA1	Liprin-alpha-1	3	190727	213382	112378	157966	100255	98147.4	234601	76941.1	175296	112129	255689	186326	266525	188025	171072	79948.7	209226	190158
P23284	PPIB	Peptidyl-prolyl cis-trans isomerase B	15	1.38214e+06	1.69166e+06	1.1834e+06	1.64582e+06	1.3885e+06	1.31892e+06	1.4914e+06	1.569e+06	1.54052e+06	1.26766e+06	1.41484e+06	1.54424e+06	1.20064e+06	1.39179e+06	1.34925e+06	1.72757e+06	1.57896e+06	2.13786e+06
Q08752	PPID	Peptidyl-prolyl cis-trans isomerase D	15	413469	437584	473951	480213	572344	474243	448136	547895	355757	510198	461275	423769	417401	415490	436103	458343	328449	423769
P30405	PPIF	Peptidyl-prolyl cis-trans isomerase F, mitochondrial	10	755924	150774	1.08783e+06	643413	1.12964e+06	1.03784e+06	418147	928853	788806	1.02469e+06	344163	526099	347976	410891	674590	1.10851e+06	222809	593801
Q9Y3C6	PPIL1	Peptidyl-prolyl cis-trans isomerase-like 1	3	476811	566474	241798	472569	206493	217417	498937	206067	430577	210749	793173	523807	705945	543974	429406	219983	479328	513824
Q9H2H8-2	PPIL3	Isoform 2 of Peptidyl-prolyl cis-trans isomerase-like 3	4	128762	148599	103046	147441	104692	115703	133545	74297.6	143832	115379	144210	136025	143064	140007	128720	84924.6	135502	146755
O43314	PPIP5K2	Inositol hexakisphosphate and diphosphoinositol-pentakisphosphate kinase 2	7	112060	105705	85669.9	89967.1	89309.9	90444.6	95807.5	87586.2	91124.1	82605.5	110739	86929.1	117734	102892	89548.6	92341.5	90952.6	105324
P35813-3	PPM1A	Isoform 3 of Protein phosphatase 1A	15	348872	416505	499053	415632	507155	481279	408895	504075	435898	472569	404605	362023	435173	382167	440288	518837	422305	420932
O75688	PPM1B	Protein phosphatase 1B	8	200036	252817	303859	237389	291778	295323	224093	292880	221324	278693	255393	271779	225164	249335	228549	352374	235184	243464
P49593	PPM1F	Protein phosphatase 1F	9	548966	553337	798405	552949	714524	894880	511956	831017	605895	855238	587968	609122	591881	536782	555566	667553	546957	551429
Q9Y570-4	PPME1	Isoform 4 of Protein phosphatase methylesterase 1	8	142647	154928	183709	150855	175445	178083	145685	133581	156354	174629	147101	131128	159236	146004	177806	176068	145548	131648
P62136	PPP1CA	Serine/threonine-protein phosphatase PP1-alpha catalytic subunit	15	1.12541e+06	1.08527e+06	1.42231e+06	1.10469e+06	1.52465e+06	1.6154e+06	1.11508e+06	1.53162e+06	1.23786e+06	1.42982e+06	1.01334e+06	1.09597e+06	1.00444e+06	1.11032e+06	1.01517e+06	1.5362e+06	1.11926e+06	1.09017e+06
P62140	PPP1CB	Serine/threonine-protein phosphatase PP1-beta catalytic subunit	13	75353.9	111507	112071	105550	123407	116552	99743.5	123995	96011.6	119153	85101.4	106680	84746.6	86409.8	87895.1	119403	89311.9	107860
P36873-2	PPP1CC	Isoform 2 of Serine/threonine-protein phosphatase PP1-gamma catalytic subunit	12	73807	77009.6	138089	98461.3	136173	140748	74602.7	142034	100314	115087	77307.7	73651.5	77361.9	76605.1	72075.2	142277	82564.4	65735.6
O14974	PPP1R12A	Protein phosphatase 1 regulatory subunit 12A	20	467560	580364	545413	525831	581586	525831	505743	407136	450809	570793	487175	480843	489015	461420	434405	566695	597809	566856
Q96A00	PPP1R14A	Protein phosphatase 1 regulatory subunit 14A	3	107313	95829.3	354107	232441	303537	233273	83226.7	257757	174269	321568	72490.2	240547	84611.5	729779	209267	277682	94025	103561
Q96C90	PPP1R14B	Protein phosphatase 1 regulatory subunit 14B	1	15304.2	25213.8	18227.5	43201.7	31831	25927.2	26649.5	31747.9	28004.5	34667.7	21876.7	20405.4	10961.3	20668.5	17947.1	20977.7	15522.9	13408.4
Q6ZMI0	PPP1R21	Protein phosphatase 1 regulatory subunit 21	9	132043	126639	97206.5	131198	102299	101888	127422	99519.9	123407	111950	150832	111797	159017	180928	147441	111450	125142	135071
O95685	PPP1R3D	Protein phosphatase 1 regulatory subunit 3D	3	152982	177217	237458	193098	208759	232083	176199	275671	183128	213320	197459	146040	246691	168022	188716	222440	209065	180505
Q9H7J1	PPP1R3E	Protein phosphatase 1 regulatory subunit 3E	8	107397	149187	147214	123111	166925	169554	124320	185137	129731	155850	143791	146663	114503	133539	140727	164258	140334	134342
Q15435	PPP1R7	Protein phosphatase 1 regulatory subunit 7	17	433880	488377	626037	520976	699378	694544	551437	553762	565341	703896	453588	511840	444721	538001	522159	612201	517947	568986
Q96SB3	PPP1R9B	Neurabin-2	6	91985	99151.5	154727	142781	148729	209081	124896	159684	138417	159684	114011	150816	111218	126637	102354	203053	133996	99151.5
P62714	PPP2CB	Serine/threonine-protein phosphatase 2A catalytic subunit beta isoform	10	450487	483970	605895	536274	588745	567506	476675	467606	524656	537139	489323	511968	498157	522307	501366	614378	500814	541265
P30153	PPP2R1A	Serine/threonine-protein phosphatase 2A 65 kDa regulatory subunit A alpha isoform	20	493346	623626	709832	551419	738555	689634	597688	742234	592153	665768	554476	582807	507117	545348	606883	748561	575949	570347
P63151-2	PPP2R2A	Isoform 2 of Serine/threonine-protein phosphatase 2A 55 kDa regulatory subunit B alpha isoform	7	304752	311380	356423	305142	367719	371026	299108	395295	331055	353263	298781	302399	307065	288649	285130	394342	302399	324305
Q15172	PPP2R5A	Serine/threonine-protein phosphatase 2A 56 kDa regulatory subunit alpha isoform	9	239796	290093	295411	274089	295085	283101	267938	231474	282158	281033	292912	282736	282736	259673	251709	262100	288183	272513
Q14738	PPP2R5D	Serine/threonine-protein phosphatase 2A 56 kDa regulatory subunit delta isoform	6	76239	76357	78675	85092.2	78760.9	75860.9	81425.9	80223.2	81508.9	76733.3	77992.2	73894.5	71737.9	67945	79150.9	71255.7	73400.1	69566.8
Q16537	PPP2R5E	Serine/threonine-protein phosphatase 2A 56 kDa regulatory subunit epsilon isoform	3	54139.5	78667.8	84411.6	68427	78599.9	78887.6	69173.8	84104	67528.3	75429	71037.9	83418.6	77704.5	74950.9	70629.6	85550.4	84652	76491.1
Q08209-2	PPP3CA	Isoform 2 of Serine/threonine-protein phosphatase 2B catalytic subunit alpha isoform	10	946474	959808	864043	1.0293e+06	969962	844602	912087	1.00558e+06	937448	882645	937681	1.18957e+06	932856	1.21808e+06	1.16864e+06	871979	977192	972178
P16298-4	PPP3CB	Isoform 4 of Serine/threonine-protein phosphatase 2B catalytic subunit beta isoform	7	189544	191810	106019	197486	103624	102887	191525	120370	190668	116324	224570	187601	191525	178746	187236	123822	197014	188240
P48454-3	PPP3CC	Isoform 3 of Serine/threonine-protein phosphatase 2B catalytic subunit gamma isoform	4	78200.6	90668.2	160720	116390	178946	147948	75468.5	90363.6	131006	164228	97344.8	83653.3	92745.8	106615	103346	108562	92234.6	81272.3
P63098	PPP3R1	Calcineurin subunit B type 1	6	329795	396266	556366	340606	571169	449926	368009	471548	370557	450809	425982	412973	352659	388073	475406	542319	403286	420572
P53041	PPP5C	Serine/threonine-protein phosphatase 5	5	557792	683177	333248	500115	353263	305647	583358	396306	416015	340606	614947	916968	555840	652410	473463	352751	618161	566430
O00743-3	PPP6C	Isoform 3 of Serine/threonine-protein phosphatase 6 catalytic subunit	9	186394	185838	290451	204331	276274	287768	202549	276274	215864	277001	182065	219044	171592	195691	200436	243881	185838	195525
Q9UPN7	PPP6R1	Serine/threonine-protein phosphatase 6 regulatory subunit 1	5	113149	123501	142609	132125	141052	150855	107287	161226	127551	149198	91118	120118	115447	101405	119403	150700	109789	108176
O75170	PPP6R2	Serine/threonine-protein phosphatase 6 regulatory subunit 2	7	78670.8	124562	120941	94250.6	130154	115557	84163.2	112499	103176	117709	89928.2	107185	95457	82456.5	107945	105201	114918	95741.2
Q5H9R7-5	PPP6R3	Isoform 5 of Serine/threonine-protein phosphatase 6 regulatory subunit 3	16	323057	422138	624216	560477	626627	576959	612142	551419	571618	586319	595066	384876	561058	379165	764944	564622	367750	339200
P50897	PPT1	Palmitoyl-protein thioesterase 1	2	92943.5	86511.3	71764.5	78491.5	62940.1	62550	67864	66381.5	55214.4	68427	80177.1	80483.3	77833.1	87289.4	78760.9	71864.4	86127	85504.7
Q06830	PRDX1	Peroxiredoxin-1	13	1.45716e+06	1.59836e+06	2.43558e+06	1.63336e+06	2.61319e+06	2.55371e+06	1.57345e+06	2.33711e+06	1.96864e+06	2.37426e+06	1.62999e+06	1.59469e+06	1.48435e+06	1.61801e+06	1.72097e+06	2.4095e+06	1.5918e+06	1.82333e+06
P32119	PRDX2	Peroxiredoxin-2	11	821747	649217	1.16572e+06	770868	885004	1.25509e+06	717399	997318	725504	977819	678605	707814	814881	1.77328e+06	875357	1.34686e+06	639874	674645
P30048	PRDX3	Thioredoxin-dependent peroxide reductase, mitochondrial	6	653516	123084	1.30838e+06	299026	1.35338e+06	1.32456e+06	249177	1.2607e+06	610966	1.27879e+06	198848	333188	304931	287631	598580	1.57832e+06	165423	258879
Q13162	PRDX4	Peroxiredoxin-4	11	198245	175111	284121	241159	254084	255497	193625	229982	236484	292392	148077	150005	203161	190074	204710	267064	182919	189012
P30044	PRDX5	Peroxiredoxin-5, mitochondrial	9	2.05889e+06	2.08916e+06	2.06804e+06	1.96864e+06	2.53368e+06	2.37426e+06	2.12053e+06	2.30297e+06	2.26224e+06	2.12792e+06	2.17644e+06	2.37993e+06	1.84719e+06	2.35037e+06	2.4812e+06	2.94705e+06	2.05083e+06	2.55362e+06
P30041	PRDX6	Peroxiredoxin-6	18	2.33217e+06	2.49313e+06	3.0423e+06	2.09604e+06	2.84839e+06	2.89354e+06	2.0693e+06	2.5935e+06	2.37426e+06	2.84839e+06	2.16004e+06	2.36572e+06	1.98328e+06	2.11496e+06	1.9231e+06	3.24457e+06	2.33217e+06	2.6543e+06
P48147	PREP	Prolyl endopeptidase	21	661274	746388	707187	629730	731053	686145	736936	851226	655520	725504	705591	696972	685714	696972	972211	791106	702921	682242
Q92954	PRG4	Proteoglycan 4	6	362440	426123	82668.4	406496	81462.9	83285	502375	144524	237726	94606.2	421196	325829	568044	326376	296923	142445	420638	344951
P49643	PRIM2	DNA primase large subunit	1	192189	228827	264542	243859	183012	430472	137544	224013	194076	215233	469420	738636	208807	245660	248549	399280	117191	253919
Q13131-2	PRKAA1	Isoform 2 of 5'-AMP-activated protein kinase catalytic subunit alpha-1	13	152439	162124	145106	149929	155959	152228	150223	160206	149474	160097	156147	143626	143985	146396	143037	157080	154014	148386
Q9Y478	PRKAB1	5'-AMP-activated protein kinase subunit beta-1	2	129971	131389	185658	110473	207434	219559	136339	192439	144841	185067	141649	134606	126863	135433	161559	172402	142641	141388
O43741	PRKAB2	5'-AMP-activated protein kinase subunit beta-2	3	72365.5	88561.5	140224	109569	133941	123186	96638.9	133985	121295	131914	88561.5	89739.4	89739.4	115151	109670	139740	92145	97124.1
P17612	PRKACA	cAMP-dependent protein kinase catalytic subunit alpha	12	412645	365859	461362	366830	475406	369518	320723	444755	385740	388411	328781	356903	288188	320123	377621	661873	346992	380749
P22694-2	PRKACB	Isoform 2 of cAMP-dependent protein kinase catalytic subunit beta	16	454391	498033	513204	499609	487776	536739	540825	509482	457290	497960	438278	513787	433732	587548	413621	453331	535601	469866
P54619-3	PRKAG1	Isoform 3 of 5'-AMP-activated protein kinase subunit gamma-1	8	384577	429392	489899	498641	527732	528323	488395	565341	506294	540354	431922	511482	398764	475809	448442	541048	454891	447987
Q9UGJ0	PRKAG2	5'-AMP-activated protein kinase subunit gamma-2	6	110304	134167	126821	124378	133377	121769	126141	148403	126511	131859	128430	122104	120608	108080	138203	159605	137507	127384
P10644	PRKAR1A	cAMP-dependent protein kinase type I-alpha regulatory subunit	17	1.66835e+06	1.60291e+06	3.00751e+06	851226	983710	1.20245e+06	1.57222e+06	825927	862310	2.23729e+06	1.54584e+06	1.57022e+06	1.60291e+06	1.48585e+06	1.20245e+06	1.82136e+06	1.91368e+06	1.70216e+06
P31321	PRKAR1B	cAMP-dependent protein kinase type I-beta regulatory subunit	8	345134	354713	424472	335132	516789	496067	361936	477741	351076	405484	314636	356739	392889	341321	364426	527732	364275	451710
P13861	PRKAR2A	cAMP-dependent protein kinase type II-alpha regulatory subunit	14	333601	364852	257915	275290	266610	237389	285313	221177	265832	266925	287174	254540	342583	245173	244044	242999	291159	303515
P31323	PRKAR2B	cAMP-dependent protein kinase type II-beta regulatory subunit	16	1.41668e+06	1.29623e+06	1.79976e+06	1.57384e+06	1.38421e+06	1.74836e+06	1.37878e+06	1.39197e+06	1.43833e+06	1.545e+06	1.26888e+06	1.412e+06	1.45821e+06	1.71001e+06	1.42982e+06	1.74836e+06	1.24851e+06	1.34499e+06
P17252	PRKCA	Protein kinase C alpha type	15	607434	628158	797549	640050	888694	761748	617090	850144	705961	831985	558690	644877	568280	641402	677794	546389	588844	599310
Q05655	PRKCD	Protein kinase C delta type	29	1.22739e+06	1.26735e+06	1.8126e+06	1.30496e+06	1.80466e+06	1.78378e+06	1.26735e+06	1.28405e+06	1.51972e+06	1.76144e+06	1.02942e+06	1.28116e+06	1.16424e+06	1.19177e+06	1.44357e+06	1.13553e+06	1.22487e+06	1.08565e+06
Q04759	PRKCQ	Protein kinase C theta type	24	1.2561e+06	1.1066e+06	957848	1.15695e+06	827825	888694	1.05038e+06	759210	1.08099e+06	943071	1.07108e+06	1.28493e+06	1.1752e+06	1.14005e+06	1.27402e+06	737170	1.22313e+06	1.18231e+06
P14314	PRKCSH	Glucosidase 2 subunit beta	18	863234	912097	1.34254e+06	1.08555e+06	1.43675e+06	1.2345e+06	948443	1.09055e+06	1.15448e+06	1.30255e+06	948443	924351	873028	951974	1.06714e+06	1.49361e+06	916644	1.09883e+06
Q9BZL6-3	PRKD2	Isoform 3 of Serine/threonine-protein kinase D2	4	204700	233256	169890	229982	181488	191154	237350	192553	192879	174499	174222	203674	220786	198058	222289	194514	198462	193754
Q13976-2	PRKG1	Isoform Beta of cGMP-dependent protein kinase 1	22	814494	857599	1.22099e+06	960165	1.56376e+06	1.22681e+06	1.01516e+06	1.5003e+06	1.08658e+06	1.1418e+06	869571	846431	935887	862925	1.06829e+06	1.545e+06	1.02148e+06	900765
Q99873	PRMT1	Protein arginine N-methyltransferase 1	3	48199.1	107397	85401.9	96610	95225	101399	120413	116253	103596	92116.5	100249	118566	73073.8	103943	106839	97908.9	104108	91531.2
P55345	PRMT2	Protein arginine N-methyltransferase 2	2	42690.8	47655.5	55687.8	56017.1	53007.9	55844.8	48286.3	60119.9	55753.8	54170.4	49621.3	59823	34801	50689.1	59468	58215.5	45387.5	49212
O14744	PRMT5	Protein arginine N-methyltransferase 5	7	243722	287252	294588	318774	312469	284318	286341	302272	329012	296923	424076	327748	332174	315667	310583	323098	265062	331800
Q6P2P2	PRMT9	Protein arginine N-methyltransferase 9	2	82350.2	94757.5	135517	109132	122754	122208	98160.4	119779	117388	176797	96519.8	72263.7	82296.4	73305.1	111450	135240	82350.2	70618.9
P04070-2	PROC	Isoform 2 of Vitamin K-dependent protein C	3	175797	221820	87448.8	157884	82605.5	92125.6	193743	94730.3	131198	93125.4	227008	148500	238061	179352	136366	94465.1	163600	182447
P07225	PROS1	Vitamin K-dependent protein S	18	1.0087e+06	989209	533576	930522	750718	736317	1.01998e+06	929464	957848	881291	1.03634e+06	902913	1.14365e+06	1.03023e+06	955871	955871	1.05461e+06	1.01998e+06
Q86WR7	PROSER2	Proline and serine-rich protein 2	6	125270	159009	161611	166064	162203	152505	122033	128214	187316	171447	202179	199787	155225	176735	145176	142544	148005	198113
P22891-2	PROZ	Isoform 2 of Vitamin K-dependent protein Z	1	73555.3	93036.6	37642.2	81383	50787.5	33424	97362.9	31695.4	78991.3	32274.8	115652	78181	112684	91191.1	59121.3	27930.3	98438.5	85169.9
P60891	PRPS1	Ribose-phosphate pyrophosphokinase 1	9	558991	544148	656988	607936	646976	710392	608800	676523	630155	701369	415847	563955	506182	536265	554339	552676	461109	617166
P11908-2	PRPS2	Isoform 2 of Ribose-phosphate pyrophosphokinase 2	10	520588	616970	563216	578825	618460	464069	538065	367203	521624	570320	551825	472250	556258	467862	496988	581131	547946	487776
Q14558-2	PRPSAP1	Isoform 2 of Phosphoribosyl pyrophosphate synthase-associated protein 1	6	459863	512873	622779	704491	663870	572344	447972	792696	535162	661285	536632	489922	507434	467868	504525	742234	460779	482923
O60256	PRPSAP2	Phosphoribosyl pyrophosphate synthase-associated protein 2	10	461878	578447	515078	528764	536274	536274	518567	550164	555566	546389	492801	543881	465543	533785	482758	537758	560921	527850
P48634	PRRC2A	Protein PRRC2A	5	45621.3	45882.9	68504.6	69338.3	55844.8	57562.7	42954.3	46648.4	61078	61793.4	52077.8	57435.8	46641.8	48385.3	56803.1	53676.8	56563.5	47234.6
Q9NRG1	PRTFDC1	Phosphoribosyltransferase domain-containing protein 1	5	130504	156762	162618	178698	135844	146600	144564	123249	180916	125657	157474	164233	124017	131759	121389	146600	150307	179661
P24158	PRTN3	Myeloblastin	3	224440	164208	422824	224304	331878	916085	155575	384149	204966	395295	349269	352062	199476	222325	629070	605895	140791	153600
Q86TP1	PRUNE1	Exopolyphosphatase PRUNE1	12	811481	1.08651e+06	1.11535e+06	848992	1.20858e+06	1.07086e+06	819445	1.08237e+06	1.00558e+06	1.12453e+06	842763	927413	635998	854105	965819	1.0099e+06	861445	842362
Q8TBF2-3	PRXL2B	Isoform 3 of Prostamide/prostaglandin F synthase	3	44181	41730	69646.5	40394.4	88798.5	59628.1	50134.7	62940.1	52854.4	70629.6	45470.8	42831.2	41519.7	43186.6	68258.3	69501.8	43590.8	42381.2
P07602-3	PSAP	Isoform Sap-mu-9 of Prosaposin	10	184078	188996	180261	172965	223503	186299	193577	266305	165030	206493	203282	232226	172641	200519	162776	298710	201475	287003
P25786-2	PSMA1	Isoform Long of Proteasome subunit alpha type-1	12	397639	442701	290701	435898	324782	313255	427740	307240	379192	366579	478571	420113	418361	442283	383948	340606	446651	444384
P25787	PSMA2	Proteasome subunit alpha type-2	4	332744	182538	312590	329485	319810	290712	282529	301310	294556	300685	237103	191121	279002	214584	284856	336745	272306	186106
P25788	PSMA3	Proteasome subunit alpha type-3	9	504019	622336	365303	620947	392105	353566	543210	349132	579934	374525	614171	540702	594186	560733	510198	370051	575220	559159
P25789	PSMA4	Proteasome subunit alpha type-4	11	1.04579e+06	1.17409e+06	571169	902806	618057	563797	1.06727e+06	639425	723244	544415	1.19436e+06	1.23127e+06	1.10931e+06	1.14502e+06	626037	658849	1.03533e+06	1.16731e+06
P28066	PSMA5	Proteasome subunit alpha type-5	8	616266	738618	830209	618460	993966	893317	598562	958532	765587	797549	764147	727398	590439	756315	669917	1.17502e+06	654601	728934
P60900	PSMA6	Proteasome subunit alpha type-6	13	553114	692097	663429	667553	589083	596967	595566	621608	674602	517498	726538	726538	579199	835439	663429	684819	665286	730987
O14818	PSMA7	Proteasome subunit alpha type-7	8	748186	761200	750718	827825	728344	710644	779560	782179	897404	688202	983068	809356	886016	874976	962115	811243	800720	825508
P20618	PSMB1	Proteasome subunit beta type-1	9	396930	463441	551419	399014	511039	483497	348317	412951	390813	466336	407335	408286	333175	411185	436436	520690	388188	445630
P40306	PSMB10	Proteasome subunit beta type-10	5	97066	124391	84772	85999	84486.4	76002.2	112231	92744.1	88991.5	78675	158965	127872	102736	134691	89626.8	104956	134797	117302
P49721	PSMB2	Proteasome subunit beta type-2	6	118481	133680	104672	139346	110145	108352	123175	116036	113167	103091	136169	162331	125627	142682	118071	125737	132261	133969
P49720	PSMB3	Proteasome subunit beta type-3	6	782695	946832	756680	802971	776273	753063	849814	757385	797549	696685	974274	962098	746996	937148	825927	834056	898686	845199
P28070	PSMB4	Proteasome subunit beta type-4	5	158390	263174	229149	201216	249527	212207	144365	246336	219009	200529	227824	205014	191574	185427	222006	263353	242972	252600
P28074	PSMB5	Proteasome subunit beta type-5	4	117921	111696	75133.5	107908	80475.2	67986.9	109299	95040	108713	94145.6	98414.5	114221	120522	153395	101330	112071	114587	106798
P28072	PSMB6	Proteasome subunit beta type-6	3	130931	159244	140654	153435	131198	143463	130441	167328	141192	143609	134141	140767	124031	115693	134649	172732	136411	135535
Q99436	PSMB7	Proteasome subunit beta type-7	7	259640	322726	388566	340178	393795	414933	344641	325977	384583	379197	300580	329134	273365	282529	290447	353736	349892	339149
P28062	PSMB8	Proteasome subunit beta type-8	6	1.31508e+06	1.41094e+06	2.84839e+06	1.66948e+06	2.71306e+06	2.35711e+06	1.33258e+06	2.89354e+06	1.87349e+06	2.49793e+06	1.36886e+06	1.4025e+06	1.34816e+06	2.12269e+06	1.76144e+06	1.80466e+06	1.33103e+06	1.3881e+06
P28065	PSMB9	Proteasome subunit beta type-9	4	276264	400275	296581	308333	320781	277408	311041	322749	301915	297388	394233	336836	277436	355849	298057	353451	310493	349892
P62191	PSMC1	26S proteasome regulatory subunit 4	16	324059	393751	344925	327307	364426	342333	362073	369252	338041	356757	371782	398051	328150	387758	336100	355757	367871	411610
P35998	PSMC2	26S proteasome regulatory subunit 7	18	370036	420611	362201	436103	379192	369838	416101	389855	407321	368206	395437	441126	380950	433128	360654	364203	426475	370036
P17980	PSMC3	26S proteasome regulatory subunit 6A	16	797945	951647	778212	769915	838738	822038	847350	844602	827825	791106	860698	920653	881272	912363	847284	865589	879107	869472
P43686	PSMC4	26S proteasome regulatory subunit 6B	12	423209	469811	319908	362053	343884	309647	467382	320837	321357	310363	486423	509894	448006	518143	341280	315277	485284	472322
P62195	PSMC5	26S proteasome regulatory subunit 8	14	232228	281117	281330	242190	287971	279050	252538	296196	253483	276597	237501	292534	224543	281712	255345	287971	265106	234998
P62333	PSMC6	26S proteasome regulatory subunit 10B	8	343234	367846	352068	324782	376115	355457	334075	389584	346787	334053	338816	342112	331451	355589	334707	397459	343234	345995
Q99460	PSMD1	26S proteasome non-ATPase regulatory subunit 1	23	618916	552102	655196	605130	635880	662288	582361	646934	611104	649085	548497	500863	544148	468419	573988	572297	521310	459575
O75832	PSMD10	26S proteasome non-ATPase regulatory subunit 10	2	156354	146731	202637	140020	216487	223662	144068	208240	193938	205189	156140	126967	177621	159656	160788	226052	142127	131475
O00231-2	PSMD11	Isoform 2 of 26S proteasome non-ATPase regulatory subunit 11	16	546153	627108	687694	613735	696685	669030	635139	622026	614378	676932	589759	618539	585200	593530	587243	508296	609128	581230
O00232	PSMD12	26S proteasome non-ATPase regulatory subunit 12	13	417149	579238	302138	501366	336274	335132	563286	283794	508006	303019	741411	582063	769516	688455	576068	261174	562099	411114
Q9UNM6-2	PSMD13	Isoform 2 of 26S proteasome non-ATPase regulatory subunit 13	16	620933	588281	645021	573007	691718	665768	554667	645021	616361	631936	535791	544259	559912	630530	570793	553762	619448	535282
O00487	PSMD14	26S proteasome non-ATPase regulatory subunit 14	5	132808	154425	195318	153599	199872	182957	133641	191685	174386	199755	144847	160749	137017	166716	155517	178587	150020	172757
Q13200	PSMD2	26S proteasome non-ATPase regulatory subunit 2	17	633008	753691	767415	710644	791106	795200	753691	776273	778826	811243	785132	773558	715710	745740	727025	739480	816055	684826
[truncated: 849 more rows]

## Sheet: Set1_Quantified peptides
Master Protein Accessions	Sequence	Modifications	# Protein Groups	# Proteins	# PSMs	# Missed Cleavages	Theo. MH+ [Da]	Abundances: MCI-A(-)-1	Abundances: MCI-A(+)-4	Abundances: MCI-A(+)-5	Abundances: MCI-A(+)-1	Abundances: MCI-A(+)-2	Abundances: AD-3	Abundances: AD-4	Abundances: SMI-1	Abundances: SMI-2
Q08379	LEAATQQNQQLR	1xTMT6plex [N-Term]	1	4	1	0	1628.89	30959.9	34278.7	10829.3	22881	29194.1	29546.6	9609.16	10782	25024.7
P49327	GYDYGPHFQGILEASLEGDSGR	1xTMT6plex [N-Term]	1	2	1	0	2597.25	30956.1	73502.4	26328.4	25300.2	22365.2	28274.7	27397.6	24335.2	48580
P04899	EYQLNDSAAYYLNDLER	1xTMT6plex [N-Term]	1	10	1	0	2306.11	129133	189394	70239.4	119421	137872	141587	77225.5	79871.7	150529
P31948-2	AMADPEVQQIMSDPAMR	1xOxidation [M2]; 1xTMT6plex [N-Term]	1	5	1	0	2135.01	23954.6	24677.6	16871.9	27968.2	24134.3	21903.3	16180.5	14627.4	28831
P31948-2	AMADPEVQQIMSDPAMR	1xTMT6plex [N-Term]	1	5	1	0	2119.02	198865	201930	118086	208461	143071	192567	114429	125241	173033
D3DR65	ISEIEDAAFLAR	1xTMT6plex [N-Term]	1	7	1	0	1563.86	257222	249782	125915	236200	111230	281532	89703.9	119412	304438
A0A024R5X2	KYDGYTSCPLVTGYNR	1xTMT6plex [K]; 1xCarbamidomethyl [C8]	1	5	1	1	2352.21	86710.9	92539.7	35913.4	113402	70971	78529.7	32275.6	36678.8	78509.8
O43149	MNCNVCDDFDLCYGCYAAK	1xTMT6plex [K/M]; 4xCarbamidomethyl [C3; C6; C12; C15]	1	3	1	0	2834.21	49628.1	37592.6	34903.2	67953.7	57673.9	48719.7	25839	40918.4	38913.1
Q9NRF8	LYGDVPFIEER	1xTMT6plex [N-Term]	1	2	2	0	1566.84	462502	488236	440507	715526	517102	612457	379937	449020	584113
Q6FIG4	NATNVEQAFMTMAAEIK	1xTMT6plex [K/N]; 1xOxidation [M]	1	4	5	0	2343.21	107514	251709	54655.8	142738	176351	183718	44331.7	47097.4	215395
Q6FIG4	NATNVEQAFMTMAAEIK	1xTMT6plex [K/N]	1	4	4	0	2327.21	55485.9	87977.8	35684.1	87082.1	109086	108214	31833	29799.3	79707.4
Q6FIG4	NATNVEQAFMTMAAEIK	1xTMT6plex [K17]	1	4	2	0	2098.05	31845	39533	23890.6	45625.6	50881.8	85849.3	25148.8	26293.4	103303
Q9UID3	ALDSDMQTLVYENYNK	1xTMT6plex [K/A]	1	7	1	0	2362.2	87726.7	107280	51553	130958	92379.2	106070	57048.6	61453.9	100598
P47897	ILQLVATGAVR	1xTMT6plex [N-Term]	1	13	1	0	1369.87	160907	139641	33802.3	128766	106459	118043	33409.8	54202.1	140611
C8C504	SFGDLSTPDAVMGNPK	1xTMT6plex [K/S]	1	1	1	0	2094.09	416848	448701	166613	543348	672923	629437	180399	253547	482064
Q6FIG4	NATNVEQAFMTMAAEIK	1xTMT6plex [K/N]; 2xOxidation [M10; M12]	1	4	2	0	2359.2	87726.7	107280	51553	130958	92379.2	106070	57048.6	61453.9	100598
B2R8Z8; Q59GL1	DLEGENIEIVFAKPPDQK	TMT6plex [K]	2	10	2	0	2729.53	198760	222517	87878.9	224303	173739	176390	85110.6	75196.9	265747
P01023	DTVIKPLLVEPEGLEK	2xTMT6plex [K5; K16]	1	1	3	0	2238.34	142661	166445	216832	171077	127172	213972	244204	865702	322451
P01023	DTVIKPLLVEPEGLEK	TMT6plex [K]	1	1	5	0	2467.5	1.25322e+06	938578	6.28371e+06	805100	1.18431e+06	889295	7.24407e+06	8.5631e+06	1.18751e+06
P11047	DGFFGNPLAPNPADK	1xTMT6plex [K/D]	1	2	1	0	2018.07	109541	112565	45427.9	95079.3	80193.2	66319.8	29588.5	31336.9	125977
O75154-3	EQNEELNGQIITLSIQGAK	1xTMT6plex [K/E]	1	4	1	0	2543.41	39395.2	56295.5	22600.5	48059.7	38070.7	47155.3	23086	23385.4	64533.5
O60890	LPGQPTIEGYLYTQEK	1xTMT6plex [K/L]	1	3	1	0	2295.26	154131	117794	82863.3	153998	138769	155893	52573.6	59442	134571
P50213	IAEFAFEYAR	1xTMT6plex [N-Term]	1	8	1	0	1445.76	342503	410826	127401	480361	365888	377513	51003.5	129670	464903
A0A024R462	CDPVDQCQDSETGTFYQIGDSWEK	1xTMT6plex [K24]; 2xCarbamidomethyl [C1; C7]	1	22	1	0	3094.32	31241.7	48198.5	31518.2	31012.1	17913.8	32256.6	21535.3	34517.1	100574
A2IPI6	LLIYGATSLQSGVPSR	1xTMT6plex [N-Term]	1	1	2	0	1891.09	67306.9	84816.4	91708.4	87211.5	51761.1	62783	70652.9	132553	93935.4
B4E2F9; P21333-2	FNEEHIPDSPFVVPVASPSGDAR	1xTMT6plex [N-Term]	2	13	12	0	2696.35	278528	335501	124558	290258	288175	304374	108373	158968	311150
B4E2F9; P21333-2	FNEEHIPDSPFVVPVASPSGDAR		2	13	3	0	2467.19
Q6P1N0	LDALEIACEVR	1xTMT6plex [N-Term]; 1xCarbamidomethyl [C8]	1	4	1	0	1517.82	341930	278649	71974.4	303460	463691	518235	64607.4	82403.2	454998
P02647	LREQLGPVTQEFWDNLEK	1xTMT6plex [K/L]	1	2	2	1	2660.44	239932	255375	794574	275348	282964	263035	1.66904e+06	275462	310598
P02647	LREQLGPVTQEFWDNLEK	1xTMT6plex [K18]	1	2	2	1	2431.28	34089.6	79378.3	65342.2	46361.7	42187.6	53888.8	157460	26374.4	89772.8
Q9NP58	SHIGVVPQDTVLFNDTIADNIR	1xTMT6plex [N-Term]	1	4	3	0	2653.41	184871	67788.1	67336.7	134833	191423	251222	60830	69897.9	137613
B3KME2	IQCEENLTPVIGGYPVEK	1xTMT6plex [K/I]; 1xCarbamidomethyl [C3]	1	6	1	0	2504.35	76455.9	95061.7	23769.8	92006.8	74851.2	89086.1	19206.4	28144.9	84308.7
A0A024R462	CDPVDQCQDSETGTFYQIGDSWEK	1xTMT6plex [K/C]; 2xCarbamidomethyl [C1; C7]	1	22	1	0	3323.49	165228	228006	150360	123839	102091	97954.7	54920.1	66765.9	201890
A0A384MDR8	ILEDNSIPQVK	1xTMT6plex [K/I]	1	3	1	0	1714.02	160166	170762	37236.7	133450	121339	136403	19473.7	39608.7	172085
C8C504	SFGDLSTPDAVMGNPK	1xTMT6plex [K16]; 1xOxidation [M12]	1	1	6	0	1880.93	24480.7	44021.1	21227.4	19865.9	24216.6	31815.7	13432.4	25234.6	74769.2
A8K7B7	SEIIPMFSNLASDEQDSVR	1xTMT6plex [N-Term]	1	8	2	0	2367.17	107366	112557	51328.2	112364	103403	106601	50898.1	41931.5	150351
C8C504	SFGDLSTPDAVMGNPK	1xTMT6plex [K16]	1	1	2	0	1864.93	32531.5	28001.8	9519.47	29510.5	35704.1	46020.4	7226.26	15732.4	41915.4
P08603	CYFPYLENGYNQNYGR	1xTMT6plex [N-Term]; 1xCarbamidomethyl [C1]	1	9	4	0	2287.04	95773.1	83412.9	95199	109028	93155.7	93887.3	109865	102524	106057
Q9H2U2-2	ESNEEEQVWHFLGK	1xTMT6plex [K/E]	1	7	4	0	2190.12	303727	293075	129998	373720	267269	327215	62658.6	130569	357823
Q96HS1	QEEDSYEIFICHANVIR	1xTMT6plex [N-Term]; 1xCarbamidomethyl [C11]	1	3	1	0	2352.15	50246.4	62722	27061.7	63416.4	58820.4	64409.9	21278.8	22616.4	64709.6
Q9NX46	ALVQSLLAK	1xTMT6plex [K/A]	1	2	1	0	1400.92	98793.8	130128	44085	98820.8	100595	104882	29034	45656.3	123923
P49840	DIKPQNLLVDPDTAVLK	TMT6plex [K]	1	3	1	0	2566.54	293796	371432	149103	353777	259196	357429	128414	144578	450293
Q9NTJ5	QVIINLINQK	1xTMT6plex [K/Q]	1	5	5	0	1641.05	701092	627069	222492	909674	498933	714877	206080	197720	449464
P07996; A0A024R9Q1	DHSGQVFSVVSNGK	1xTMT6plex [K/D]	2	4	8	0	1919.04	4.74879e+06	5.63775e+06	2.11403e+06	5.84126e+06	4.25056e+06	5.36253e+06	1.43156e+06	2.0094e+06	5.64415e+06
A0A0D9SGF6	DLNSQADSLMTSSAFDTSQVK	1xTMT6plex [K/D]	1	7	1	0	2703.35	60646.7	46425.7	37828.3	95783.3	85960.3	87783	22408.8	37608.1	57412
A0A1S5UZ07	ERIPEAPAGPPSDFGLFLSDDDPKK	TMT6plex [K]	1	2	2	2	3385.82	209806	274570	62862.1	273626	206053	242920	70619.5	58087	245485
Q9UHD2	INLEAAELGEISDIHTK	1xTMT6plex [K/I]	1	2	1	0	2311.29	58803	71595.5	30015.9	62544.3	57709.2	65962.1	25462.9	30592.6	87974.4
B2R6W1; A8K2T4	DGFVQDEGTMFPVGK	1xTMT6plex [K/D]	2	4	1	0	2085.07	46033.7	48785.5	73455.8	39640.2	54729.8	36853.5	134461	92199.9	64596.1
Q06033	EVSFDVELPK	1xTMT6plex [K/E]	1	5	1	0	1620.92	66556.7	72535.8	208645	64484.1	71104.9	64279.1	248477	222090	94621.4
P50453	IEELLPGSSIDAETR	1xTMT6plex [N-Term]	1	1	2	0	1859	147040	158458	78644	150691	104446	145697	71357.5	69813.7	179506
Q9HD26	EAQLEAEVK	1xTMT6plex [K/E]	1	5	2	0	1474.85	271970	255509	106818	237529	221803	209667	107173	94796.5	269020
P29401-2	LGQSDPAPLQHQMDIYQK	1xTMT6plex [K/L]	1	9	3	0	2527.34	74963.4	82339.6	34965	70235.9	63608	62706.8	26849.3	29090	100903
Q9UHY1	EPVQTLYSQSPALELDK	1xTMT6plex [K/E]	1	3	1	0	2376.31	52959.5	69558.3	29791.2	65310.2	40303.7	46008.1	19775.5	21475.7	99117.8
A0A0B4J2A0	SSGFPVHLLPDIAEPGSVAGR	1xTMT6plex [N-Term]	1	3	1	0	2335.26	111766	95084.5	43568.6	93712	74529.7	75164.8	29816.3	40886.9	88093.6
B2R6X6	GSGDPSSSSSSGNPLVYLDVDANGKPLGR	1xTMT6plex [K/G]	1	4	1	0	3291.69	24276	30384.1	13975	26099.6	24506.8	23618	2734.51	9459.82	29304.7
B2RAY1	DFASEVSNVLNK	1xTMT6plex [K/D]	1	3	1	0	1780.98	520090	264158	210614	639415	458365	499539	160832	258256	350441
P46939-2	DVLNDSENK	1xTMT6plex [K/D]	1	3	2	0	1491.81	210488	169121	56772	228401	215041	212165	64754.2	59696.7	150287
D3DNU8	ENFLFLTPDCK	1xTMT6plex [K/E]; 1xCarbamidomethyl [C10]	1	6	4	0	1841.99	684902	926413	3.42488e+06	863828	970307	804637	3.72428e+06	3.4331e+06	982790
P08670	KVESLQEEIAFLK	TMT6plex [K]	1	4	1	1	2221.34	657917	290275	400690	1.328e+06	2.89245e+06	952420	247915	468339	313623
P30043	YVAVMPPHIGDQPLTGAYTVTLDGR	1xOxidation [M5]; 1xTMT6plex [N-Term]	1	2	1	0	2916.51	42029.1	68458.4	15299.4	31601.4	35781.4	40355.5	19083	16255.1	91588.7
P30043	YVAVMPPHIGDQPLTGAYTVTLDGR	1xTMT6plex [N-Term]	1	2	1	0	2900.52	54407.6	66532.9	30711.3	48004.3	69544.1	75394	27781.3	36224.8	99618.8
P30043	YVAVMPPHIGDQPLTGAYTVTLDGR		1	2	1	0	2671.35
P30044	ALNVEPDGTGLTCSLAPNIISQL	1xTMT6plex [N-Term]; 1xCarbamidomethyl [C13]	1	4	4	0	2612.38	2801.44	4425.42	3392.13	3477.7	3856.09	4676.57	5947.91	3581.34	7645.72
A0A024R5X2	AEPLETFPFDQSK	1xTMT6plex [K/A]	1	5	2	0	1967.05	165839	287716	55812.3	262451	172454	231757	26481.8	43384.7	217073
Q5U0I6	NATNVEQSFMTMAAEIK	1xTMT6plex [K/N]; 1xOxidation [M]	1	6	3	0	2359.2	45455	69338.1	24421.7	48757.7	51939.3	56653.4	20473	27427.9	52203.7
Q5U0I6	NATNVEQSFMTMAAEIK	1xTMT6plex [K/N]	1	6	1	0	2343.21	62472.5	87087.3	35688.3	83616.5	102768	116349	31755.4	27702.1	83708.8
Q5U0I6	NATNVEQSFMTMAAEIK	1xTMT6plex [K17]	1	6	1	0	2114.05	20682.6	28851.9	14373.7	30106.3	28294.7	40381.1	13005.1	13384.4	58214.1
P13797	VYALPEDLVEVKPK	TMT6plex [K]	1	10	1	0	2287.39	1.39076e+06	1.50069e+06	720045	2.63122e+06	1.33236e+06	1.15271e+06	508299	846339	1.1206e+06
P29401-2	LGQSDPAPLQHQMDIYQK	1xTMT6plex [K18]	1	9	1	0	2298.17	50090.6	70942.4	33977.6	71286.3	54620.1	71313.8	35289.5	42376.8	122264
Q9H4B7	FWEMIGEEHGIDLAGSDR		1	1	13	0	2061.93
P16157-14	LALQAQPVPDELVTK	1xTMT6plex [K/L]	1	19	3	0	2080.24	221754	298283	128605	289354	240409	296421	91973.2	101315	348586
P43250-2	QLTQNFLSHTGPDLIPEVPR	1xTMT6plex [N-Term]	1	9	2	0	2491.35	573371	685162	277581	594583	542412	556197	176173	237982	502832
A8K7B7	SEIIPMFSNLASDEQDSVR	1xOxidation [M6]; 1xTMT6plex [N-Term]	1	8	1	0	2383.16	68217.5	125960	46684.8	93660.4	105836	81633.5	31814.3	46267.4	95470.1
Q96BS2	NVVEELLSGNPHIEK	1xTMT6plex [K/N]	1	2	1	0	2136.21	143605	254502	25035.6	158866	151138	161986	40122.6	39422.3	151781
L7UUZ7	DDLWSIQNLGTK	1xTMT6plex [K/D]	1	9	6	0	1848.03	4.23399e+06	877078	1.32589e+06	4.2933e+06	2.88312e+06	5.17724e+06	676853	803602	1.93871e+06
Q9UQ16-3	RIEGSGDQVDTLELSGGAK	1xTMT6plex [K/R]	1	8	1	1	2390.29	41726.5	57529.1	48560.7	70004.5	40845.5	49992	34502.2	33436.9	60373.3
Q9NPJ3	LGEDIVITAHVLK	1xTMT6plex [K/L]	1	2	1	0	1866.15	60599.6	83690.1	38571.8	92722	75962.2	88899.3	22392.1	33443.1	97194
C0JYY2	HIQNIDIQHLAGK	1xTMT6plex [K/H]	1	3	2	0	1945.14	95871.4	102885	122239	112909	85540.3	74578.3	193920	208632	90533.9
Q86TV6-2	LIANDDMAELLLGESK	1xTMT6plex [K/L]	1	2	2	0	2190.21	52207.1	50714.6	87728.3	51120.7	43782.8	47174.2	107710	74504	61858
P67936-2; P67936	EENVGLHQTLDQTLNELNCI	1xTMT6plex [N-Term]; 1xCarbamidomethyl [C19]	2	7	2	0	2569.28	218467	172156	86920.2	214017	154593	180952	98581.4	88940.7	239444
P67936-2; P67936	EENVGLHQTLDQTLNELNCI	1xCarbamidomethyl [C19]	2	7	1	0	2340.11
O95747	DTAEGVSQELISAGLVDGR	1xTMT6plex [N-Term]	1	1	2	0	2146.12	159319	188220	75610.4	181994	143750	170891	64041.8	71435.7	221878
V9HWB4	DNHLLGTFDLTGIPPAPR	1xTMT6plex [N-Term]	1	1	10	0	2163.18	160216	176887	102814	204003	144710	170425	68836.9	78845.9	176600
A0A024RAI1	HGIVEDWDLMER	1xTMT6plex [N-Term]	1	5	5	0	1728.86	1.67801e+06	1.97492e+06	919419	2.21186e+06	1.77406e+06	2.08776e+06	767551	972409	1.94816e+06
Q14894	VPAFLSAAEVEEHLR	1xTMT6plex [N-Term]	1	4	2	0	1897.04	51112.9	77229.8	22088	56618.8	57399.3	96651.9	17778.9	25145.7	135383
P04275; L8E853	TYGLCGICDENGANDFMLR	1xOxidation [M17]; 1xTMT6plex [N-Term]; 2xCarbamidomethyl [C5; C8]	2	3	2	0	2451.09	35036.3	47011.5	16177.1	45194.5	37166	34014.7	13662	17511.9	29845.4
P04275; L8E853	TYGLCGICDENGANDFMLR	1xTMT6plex [N-Term]; 2xCarbamidomethyl [C5; C8]	2	3	2	0	2435.1	170718	178382	96367.9	252972	220481	220760	89711.3	276879	164934
P04275; L8E853	TYGLCGICDENGANDFMLR	2xCarbamidomethyl [C5; C8]	2	3	1	0	2205.94
Q9NQ75	QQLYDIPASPK	1xTMT6plex [K/Q]	1	4	1	0	1717.99	154800	165436	79414.8	148070	101783	128780	53881.8	65311.4	122282
V9HWB4	DNHLLGTFDLTGIPPAPR		1	1	1	0	1934.01
Q969M7-2	FQFETEVPDAYNMVPPK	1xTMT6plex [K/F]	1	12	1	0	2470.27	78876.6	49885.1	37678.3	74871.7	64427.2	72096.2	35794.7	33954	60650.9
B2RBR9	SSAYESLMEIVK	1xTMT6plex [K/S]	1	7	4	0	1815	1.36078e+06	1.3968e+06	1.17055e+06	1.715e+06	1.53468e+06	1.70115e+06	1.06831e+06	1.62992e+06	1.40676e+06
B2RDK5	LLYEANLPENFR	1xTMT6plex [N-Term]	1	7	1	0	1707.93	320851	625280	146409	448273	336163	370957	120688	161962	584890
A0A2R8Y793; V9HVZ7; B4DW52	CPEALFQPSFLGMESCGIHETTFNSIMK	1xTMT6plex [K28]; 2xOxidation [M13; M27]; 2xCarbamidomethyl [C1; C16]	3	20	2	0	3492.61	18599.3	28273.8	10114.2	20685.2	16196.5	39029.5	13502.8	18478.4	39352.9
A0A2R8Y793; V9HVZ7; B4DW52	CPEALFQPSFLGMESCGIHETTFNSIMK	1xTMT6plex [K28]; 1xOxidation [M27]; 2xCarbamidomethyl [C1; C16]	3	20	2	0	3476.62	36345	26806.6	24912.5	43854	34059.6	213400	21987.1	86871.2	78571
A0A2R8Y793; V9HVZ7; B4DW52	CPEALFQPSFLGMESCGIHETTFNSIMK	1xTMT6plex [K28]; 2xCarbamidomethyl [C1; C16]	3	20	1	0	3460.62	26116.8	22682.2	16063.5	29303	29312.8	77446.8	12778	33017.7	35818.9
Q53H88; Q13561-2	LLHEVQELTTEVEK	1xTMT6plex [K/L]	2	11	1	0	2126.21	252705	236173	117962	253922	181346	217581	70698.1	96128.1	219749
A0A2U8J954	AEDTALYYCVR	1xTMT6plex [N-Term]; 1xCarbamidomethyl [C9]	1	2	4	0	1589.78	54581.7	53336.4	73215.1	62087.7	39827.8	59752.6	76662.9	61775.3	44134
[truncated: 33,870 more rows]

## Sheet: Set2_Quantified peptides
Master Protein Accessions	Sequence	Modifications	# Protein Groups	# Proteins	# PSMs	# Missed Cleavages	Theo. MH+ [Da]	Abundances: MCI-A(-)-4	Abundances: MCI-A(-)-5	Abundances: MCI-A(-)-2	Abundances: MCI-A(-)-3	Abundances: MCI-A(+)-3	Abundances: AD-1	Abundances: AD-2	Abundances: SMI-3	Abundances: SMI-4
[truncated: 21,785 more rows]
