# Supplementary material for: Platelet proteomic signatures of amyloid β-positive mild cognitive impairment and Alzheimer’s disease
Source: Mol Brain. 2026 Mar 28;19:33. doi: 10.1186/s13041-026-01294-2 (PMC13151324; doi:10.1186/s13041-026-01294-2)
Supplement: Supplementary file 5 — Supplementary Material 5 DEPs associated with cognitive decline and Aβ among SMI, MCI-A(−), MCI-A(+), and AD groups [file 13041_2026_1294_MOESM5_ESM.xlsx]

## Sheet: AD vs SMI
Accession	Gene name	Description	AD-1	AD-2	AD-3	AD-4	MCI-A(+)-1	MCI-A(+)-2	MCI-A(+)-3	MCI-A(+)-4	MCI-A(+)-5	MCI-A(-)-1	MCI-A(-)-2	MCI-A(-)-3	MCI-A(-)-4	MCI-A(-)-5	SMI-1	SMI-2	SMI-3	SMI-4	log2 FC	p value
Q8IUZ5	PHYKPL	5-phosphohydroxy-L-lysine phospho-lyase	16.4427	16.9062	17.2653	17.4756	17.953	16.4351	16.7038	15.927	16.4071	17.4986	16.4503	16.6496	16.2885	16.7143	16.2602	16.2433	16.4262	16.3635	0.699132	0.0229347
P28907	CD38	ADP-ribosyl cyclase/cyclic ADP-ribose hydrolase 1	18.0848	17.8059	17.6066	17.1792	16.1287	17.1467	17.2841	16.5844	16.9283	16.2905	17.6564	17.4688	17.9986	17.5397	16.9131	17.3594	16.8709	17.4781	0.513726	0.0809188
P08575	PTPRC	Receptor-type tyrosine-protein phosphatase C	20.4021	19.8495	20.0194	20.54	20.5814	19.5771	19.8556	19.382	19.925	20.0817	19.9212	19.9207	20.0655	19.9495	19.9788	19.2572	19.7139	19.8773	0.495963	0.0713578
P27449	ATP6V0C	V-type proton ATPase 16 kDa proteolipid subunit	17.23	17.1533	17.5273	17.4799	17.338	17.2273	17.1106	16.936	17.7811	17.0486	16.9677	16.9731	17.1371	16.7289	17.0717	16.6599	17.0088	16.9557	0.423573	0.0169908
Q5VIR6-4	VPS53	Isoform 4 of Vacuolar protein sorting-associated protein 53 homolog	17.5492	17.6079	17.5807	17.7602	17.5628	17.4986	17.4354	17.7071	17.5717	17.551	17.0933	17.5982	16.8898	17.4151	17.484	17.3585	17.1682	16.8682	0.404762	0.0290856
A0A0B4J1X5	IGHV3-74	Immunoglobulin heavy variable 3-74	21.3169	20.6844	21.1686	20.7665	20.8373	21.2344	20.5909	20.5735	20.6583	20.8541	20.703	20.1008	20.6655	20.3136	20.4006	20.6184	20.5678	20.7502	0.399846	0.0563423
Q02218	OGDH	2-oxoglutarate dehydrogenase, mitochondrial	18.5532	17.9718	18.0657	17.7328	17.8147	18.3061	17.7353	17.6329	17.5037	17.9743	17.5562	17.9885	18.311	17.9527	17.7456	17.7071	17.5749	17.6983	0.399391	0.0640101
O15162	PLSCR1	Phospholipid scramblase 1	18.2522	17.988	18.2534	18.2103	17.9167	18.2519	18.0619	18.0031	17.7056	18.1126	18.2375	17.8716	17.4608	17.5193	17.7077	17.7931	17.6886	17.974	0.385123	0.00546608
O00186	STXBP3	Syntaxin-binding protein 3	18.8232	18.3055	18.3783	18.4488	18.1866	18.3947	18.4493	18.3764	18.257	18.2663	17.9681	18.488	18.2071	18.4197	18.1743	18.1274	17.9835	18.1582	0.378097	0.0219269
Q969X1	TMBIM1	Protein lifeguard 3	17.3595	16.9925	17.5531	17.0974	17.1328	17.2237	16.962	16.3147	17.2251	17.2605	17.023	16.967	17.2462	17.0383	16.9278	16.6522	16.8119	17.1178	0.373158	0.05894
Q09666	AHNAK	Neuroblast differentiation-associated protein AHNAK	18.8091	18.8836	18.7917	18.4942	18.6339	19.0307	18.1919	18.7917	18.637	18.6782	18.2561	19.1306	18.4247	18.862	18.597	18.5573	18.1929	18.1659	0.36638	0.0434927
Q9Y4D1	DAAM1	Disheveled-associated activator of morphogenesis 1	19.9627	19.3786	19.5341	19.7533	19.3108	19.7754	19.5253	19.4962	19.2665	19.2394	19.0229	19.59	19.4071	19.6123	19.2705	19.1744	19.2939	19.4308	0.364784	0.0384604
Q562R1	ACTBL2	Beta-actin-like protein 2	17.5586	17.7985	17.7779	17.5484	17.899	17.675	17.3927	16.9193	17.3787	17.5255	17.8391	18.3564	17.6784	18.2997	17.0913	17.3573	17.4182	17.4221	0.348612	0.0152026
Q8N5K1	CISD2	CDGSH iron-sulfur domain-containing protein 2	18.8436	18.3753	18.613	18.7366	18.3248	18.5083	18.6406	18.4236	18.3883	18.4479	18.3349	17.9352	18.8492	18.5344	18.385	18.3479	18.3523	18.0975	0.346427	0.0284016
O75843	AP1G2	AP-1 complex subunit gamma-like 2	16.5958	16.5609	16.6082	16.4944	16.8112	16.7058	16.4585	16.256	16.6177	16.5955	16.5055	16.6189	16.3946	16.5599	16.4225	15.8579	16.4409	16.2349	0.325811	0.0558134
Q9Y6B7	AP4B1	AP-4 complex subunit beta-1	16.2495	15.9297	15.9845	16.05	16.2107	15.9866	15.8667	15.9194	16.0655	16.1351	15.8282	15.8333	15.4704	15.7157	15.9059	15.3186	15.9761	15.7285	0.321166	0.0964636
Q96JJ3	ELMO2	Engulfment and cell motility protein 2	18.2253	17.5924	18.1719	17.9288	18.5478	18.2275	18.0151	18.1519	18.1545	17.9757	17.8521	17.7516	17.8375	17.8686	17.7965	17.4799	17.6994	17.6994	0.310799	0.098591
Q99570	PIK3R4	Phosphoinositide 3-kinase regulatory subunit 4	17.6135	17.4836	17.7577	17.6759	17.8491	17.4893	17.3912	17.3742	17.6422	17.6192	17.4264	17.3323	17.2546	17.3582	17.6202	17.0787	17.2533	17.376	0.300645	0.0566048
P16083	NQO2	Ribosyldihydronicotinamide dehydrogenase [quinone]	16.4119	16.6069	16.383	16.6669	15.7097	15.5679	16.69	15.9023	16.1059	16.7199	16.1568	16.5203	16.1157	16.3983	16.2692	16.1114	16.2753	16.2397	0.293297	0.010613
Q15036	SNX17	Sorting nexin-17	18.3442	18.1167	17.9423	18.1866	17.8871	17.8215	17.8245	17.9444	17.8769	17.8452	18.0407	17.8937	17.7985	17.1742	17.8788	17.9714	17.8464	17.7371	0.289031	0.0239754
P23470	PTPRG	Receptor-type tyrosine-protein phosphatase gamma	17.272	17.16	16.8516	17.1354	16.6391	16.6512	16.9714	16.3081	17.0359	16.3678	16.9882	17.1479	17.0617	17.1427	16.6583	16.6076	16.9078	17.0959	0.287381	0.0941439
Q8NEW0	SLC30A7	Zinc transporter 7	17.0196	16.675	16.6906	17.0516	16.6749	16.6619	16.7951	16.6348	16.9193	16.7128	16.7925	16.6897	17.0378	16.8926	16.7861	16.3664	16.5432	16.6358	0.276314	0.0860232
P25686	DNAJB2	DnaJ homolog subfamily B member 2	17.0219	17.0242	17.2564	17.0404	17.4052	17.3253	16.976	17.109	17.1543	17.2059	16.7395	16.8135	16.5169	16.6297	16.7548	17.0351	16.6905	16.823	0.25991	0.0327254
P61769	B2M	Beta-2-microglobulin	17.328	17.4379	17.5934	17.445	17.2587	17.362	17.1242	17.2013	17.0141	17.1922	17.2373	17.3043	17.2016	17.4476	16.9768	17.3527	17.1778	17.3135	0.245875	0.0505865
Q5MNZ9	WIPI1	WD repeat domain phosphoinositide-interacting protein 1	17.97	17.8371	17.7811	17.8476	17.7965	17.5518	18.1388	17.9938	17.675	17.801	17.701	17.7874	17.7492	17.7457	17.4297	17.8084	17.7108	17.5596	0.231805	0.0459432
O15084-1	ANKRD28	Isoform 3 of Serine/threonine-protein phosphatase 6 regulatory ankyrin repeat subunit A	17.7475	17.5799	17.8317	17.6152	17.7227	17.6094	17.5683	17.4074	17.4556	17.6152	17.549	17.4675	17.6702	17.5899	17.5733	17.5161	17.4596	17.3602	0.21627	0.0265989
P42345	MTOR	Serine/threonine-protein kinase mTOR	17.6578	17.9459	17.7677	17.8215	17.9838	17.7667	17.8046	18.0012	17.938	17.9499	17.7034	17.7124	17.591	17.6529	17.7356	17.5609	17.7124	17.371	0.203211	0.0965355
Q99460	PSMD1	26S proteasome non-ATPase regulatory subunit 1	19.2394	19.0746	19.3216	19.2069	19.2784	19.3371	19.1516	19.3033	19.2211	19.308	19.0651	18.9341	19.0536	18.8374	19.1307	19.1264	18.9918	18.8099	0.195906	0.0755566
Q5XPI4-2	RNF123	Isoform 2 of E3 ubiquitin-protein ligase RNF123	17.3987	17.307	17.4119	17.1073	17.4938	17.4677	17.0716	17.3993	16.9562	17.3176	17.2798	17.1836	17.5331	17.4616	17.0691	17.0605	17.1914	17.1686	0.183811	0.0563704
Q8IUR7	ARMC8	Armadillo repeat-containing protein 8	16.8904	16.875	17.0312	16.7819	17.2224	17.1456	16.618	16.9594	16.8374	17.1474	16.9768	16.6692	16.9425	16.7024	16.8481	16.684	16.7304	16.5926	0.180817	0.0501816
Q9H9C1	VIPAS39	Spermatogenesis-defective protein 39 homolog	16.6616	16.5775	16.6442	16.5636	16.5646	16.6816	16.5846	16.6297	16.6209	16.7143	16.4858	16.5631	16.3917	16.5457	16.481	16.3958	16.5178	16.3323	0.180012	0.00981127
O95372	LYPLA2	Acyl-protein thioesterase 2	18.2	18.2376	18.3289	18.3211	18.5254	18.3317	18.1719	18.3497	18.3806	18.4078	18.0943	18.1702	18.143	18.1122	18.214	18.0936	18.1558	17.9426	0.170442	0.0425492
Q92974	ARHGEF2	Rho guanine nucleotide exchange factor 2	18.1511	18.3376	18.3016	18.1455	18.4057	18.3358	18.0009	18.6069	18.2761	18.3358	18.1796	18.0066	18.0835	18.0003	18.1308	18.1232	18.0217	18.0255	0.158672	0.0344707
Q6PGP7	TTC37	Tetratricopeptide repeat protein 37	17.7508	17.7117	17.9186	17.7413	18.0327	17.8361	17.7099	17.9051	17.801	17.8663	17.8067	17.5546	17.5879	17.6088	17.6828	17.5786	17.753	17.5113	0.149177	0.0810887
O75165	DNAJC13	DnaJ homolog subfamily C member 13	18.0367	17.9894	18.0831	18.1099	17.8968	18.0795	18.1046	18.0276	17.9878	17.9998	17.9674	18.2342	17.9206	18.1167	18.0202	17.7953	17.9894	17.8195	0.14867	0.0573108
P00747	PLG	Plasminogen	21.4967	21.3844	21.5089	21.4908	20.9798	21.2937	21.5664	21.3567	21.58	21.1298	21.5491	21.2657	21.802	21.4167	21.2344	21.3065	21.4967	21.3455	0.124469	0.0930731
P10153	RNASE2	Non-secretory ribonuclease	17.0729	17.0192	16.8436	16.878	16.5336	16.8012	17.1801	16.7642	16.7994	16.6688	17.1161	17.5315	17.2398	17.0923	16.8107	16.7748	16.8997	16.8335	0.123761	0.088756
P07332	FES	Tyrosine-protein kinase Fes/Fps	17.7319	17.9421	17.9246	17.8758	18.0902	17.7733	17.7221	17.6999	17.8708	17.9751	17.8176	17.9216	17.8832	17.9618	17.8426	17.7319	17.6973	17.7221	0.120119	0.0818949
Q14738	PPP2R5D	Serine/threonine-protein phosphatase 2A 56 kDa regulatory subunit delta isoform	16.2182	16.2205	16.2636	16.3767	16.2652	16.2111	16.3132	16.2917	16.3147	16.2276	16.251	16.1732	16.1304	16.0521	16.2723	16.1207	16.1635	16.0861	0.109108	0.0941488
P25325-2	MPST	Isoform 2 of 3-mercaptopyruvate sulfurtransferase	18.008	17.8563	17.9237	17.8379	17.9998	17.9029	18.1306	17.6087	17.9179	17.9423	18.0637	18.1577	18.0442	18.1332	17.9813	17.9883	17.9755	18.0944	-0.103386	0.0738905
P15170-3	GSPT1	Isoform 3 of Eukaryotic peptide chain release factor GTP-binding subunit ERF3A	19.1771	19.1981	19.1819	19.299	19.2327	19.1673	19.4661	19.2694	19.2383	19.2456	19.1914	19.5704	19.0722	19.3701	19.3466	19.3955	19.1962	19.3805	-0.115622	0.0756723
Q9Y266	NUDC	Nuclear migration protein nudC	17.9139	18.0886	17.8404	17.9689	17.9641	17.7945	17.9949	17.8317	17.9315	17.9094	18.0814	18.0814	18.0539	18.0407	18.0255	18.0353	18.1614	18.1833	-0.148418	0.0674961
Q9Y5X3	SNX5	Sorting nexin-5	17.999	18.0841	18.0648	18.0364	18.2176	18.3899	18.2571	17.7722	18.035	18.1193	18.1648	18.2126	17.9548	18.0781	18.1719	18.1036	18.1854	18.344	-0.155161	0.0285123
P31939	ATIC	Bifunctional purine biosynthesis protein PURH	19.1668	19.4042	19.3136	19.2305	19.3746	19.2441	19.2791	19.2965	19.585	19.4186	19.7698	19.4689	19.9171	19.4689	19.3517	19.5224	19.3145	19.5556	-0.157279	0.0945814
P15907	ST6GAL1	Beta-galactoside alpha-2,6-sialyltransferase 1	16.8461	17.073	16.7578	16.7282	16.9173	17.1234	16.8851	17.2405	16.7225	17.1029	17.0593	16.9095	16.9195	16.9644	17.068	17.062	17.005	16.9678	-0.174455	0.0764583
P46976	GYG1	Glycogenin-1	19.5057	19.7157	19.6779	19.5723	19.7207	19.925	19.6191	19.7178	19.694	19.5329	19.6413	19.6453	19.556	19.6969	19.6677	19.9667	19.7406	19.7955	-0.174771	0.071103
Q9NVZ3-2	NECAP2	Isoform 2 of Adaptin ear-binding coat-associated protein 2	17.7164	17.8748	17.6783	17.7355	17.8032	17.6272	17.8264	17.7867	17.771	17.8215	17.8847	17.8847	17.7693	17.8091	17.9623	18.0606	17.7478	17.9554	-0.180266	0.0614316
Q9UGJ0	PRKAG2	5'-AMP-activated protein kinase subunit gamma-2	16.7511	17.0337	16.9524	16.9244	17.0251	16.8938	16.9447	17.1792	16.9489	17.0086	16.9706	16.8978	16.88	16.7217	17.0764	17.2841	17.0691	16.9588	-0.181738	0.0906835
Q9Y4L1	HYOU1	Hypoxia up-regulated protein 1	20.4022	20.6659	20.4304	20.5217	20.5602	20.4677	20.7117	20.6131	20.6348	20.4814	20.6449	20.7564	20.5728	20.7032	20.5679	20.7794	20.6659	20.7637	-0.189161	0.0493413
O00233	PSMD9	26S proteasome non-ATPase regulatory subunit 9	18.0784	18.235	18.1066	18.1499	18.0515	18.1178	18.1119	18.0244	18.1151	18.1161	18.2458	18.1603	18.2677	18.2408	18.4512	18.3436	18.2374	18.3198	-0.195531	0.0127126
Q9NTK5	OLA1	Obg-like ATPase 1	20.1687	20.2944	20.2618	20.2223	20.3918	20.4087	20.2913	20.4814	20.3681	20.3637	20.2109	20.3337	20.1744	20.2584	20.327	20.6882	20.2836	20.498	-0.21237	0.0689749
Q99685	MGLL	Monoglyceride lipase	19.2822	19.4581	19.39	19.2789	19.6698	19.4033	19.5043	19.1405	19.5102	19.2374	19.6892	19.5291	19.5543	19.468	19.5179	19.4847	19.4156	19.8784	-0.221832	0.0960118
P00441	SOD1	Superoxide dismutase [Cu-Zn]	18.3158	18.3675	18.2692	18.3947	17.966	18.2326	18.4649	18.3525	18.5275	18.2446	18.4602	18.3319	18.76	18.7167	18.4488	18.5981	18.5641	18.6297	-0.223422	0.00359641
Q9UHY1	NRBP1	Nuclear receptor-binding protein	18.7691	19.149	18.9545	18.9013	19.1033	18.9396	19.0693	19.1496	18.9377	18.972	19.139	18.9251	18.9443	18.9263	19.2549	19.3349	19.0065	19.0808	-0.225816	0.0845882
Q9HAB8	PPCS	Phosphopantothenate--cysteine ligase	18.451	18.7535	18.6812	18.7208	18.6322	18.6447	18.6941	18.6823	18.663	18.6686	18.8679	18.6609	18.7594	18.7342	18.6791	18.9784	19.0591	18.797	-0.226748	0.0849601
Q6PKG0	LARP1	La-related protein 1	17.3998	17.4263	17.4669	17.4811	17.6285	17.4086	17.5962	17.5016	17.5073	17.537	17.4731	17.461	17.3315	17.4713	17.7648	17.6285	17.6371	17.6847	-0.23528	0.000647213
P13716-2	ALAD	Isoform 2 of Delta-aminolevulinic acid dehydratase	19.5772	19.5115	19.5236	19.4519	19.7709	19.5755	20.2098	19.5622	19.6078	19.7193	19.4893	19.6426	19.1607	19.7488	19.8934	19.8583	19.5803	19.7165	-0.246067	0.0178679
O00462	MANBA	Beta-mannosidase	16.6315	16.5278	16.6315	16.5782	16.7214	16.7595	16.8994	16.8882	16.6493	16.7618	16.0882	16.9904	16.4312	16.7319	16.7172	17.0516	16.7722	16.8204	-0.248079	0.0186857
Q8N6M0	OTUD6B	Deubiquitinase OTUD6B	17.0642	17.1077	16.6424	17.0037	16.8751	16.7344	17.0761	17.0665	17.1511	16.9607	17.5052	17.2731	17.2778	17.282	17.0396	17.1523	17.2494	17.3737	-0.249241	0.0989499
Q15370-2	ELOB	Isoform 2 of Elongin-B	19.3547	19.5623	19.3705	19.5102	19.4015	19.3675	19.6368	19.4057	19.5771	19.4069	19.5578	19.6803	19.4113	19.4399	19.6397	19.6128	19.7166	19.8385	-0.252476	0.0127842
P30044	PRDX5	Peroxiredoxin-5, mitochondrial	20.9734	20.9945	20.9798	20.9088	21.2728	21.179	21.016	21.1351	21.1093	21.021	21.0535	21.1825	20.8169	21.1645	21.2426	21.4908	20.9678	21.2841	-0.282203	0.0415508
P16930	FAH	Fumarylacetoacetase	18.6209	18.4394	18.7376	18.7585	18.7758	18.7367	18.6654	18.8301	18.7133	18.8405	18.838	18.6856	18.642	18.939	18.868	19.1146	18.8661	18.8801	-0.293103	0.0216503
Q9H4A5	GOLPH3L	Golgi phosphoprotein 3-like	17.0673	17.4788	17.382	17.3176	17.5448	17.5499	17.5045	17.3859	17.1551	17.3065	17.3019	17.3282	17.0044	17.3081	17.4284	17.8968	17.4432	17.6523	-0.29376	0.081745
O60869	EDF1	Endothelial differentiation-related factor 1	14.6347	14.7419	14.6679	15.0086	15.134	14.693	14.7325	15.2637	14.5602	14.9312	14.5087	14.5958	14.8646	14.7732	15.0749	15.144	14.8291	15.1866	-0.295405	0.0443558
P46783	RPS10	40S ribosomal protein S10	15.1518	14.9335	14.9864	14.7524	15.3629	15.1368	15.5787	15.5201	14.7113	14.9489	14.9889	15.4609	15.0769	15.5261	15.5938	15.2637	15.3227	14.9269	-0.320771	0.0915075
P35270	SPR	Sepiapterin reductase	15.7425	15.9983	16.133	15.682	16.4783	15.8353	15.9639	16.1939	15.8386	16.2221	15.8936	16.017	15.9723	16.031	16.0953	16.481	16.0053	16.2731	-0.324711	0.0728884
P02679	FGG	Fibrinogen gamma chain	22.855	22.7084	22.5357	23.2181	22.8869	22.8345	22.855	22.8345	23.1038	23.1038	23.0355	22.855	23.1135	22.855	23.1038	22.9828	23.3557	23.1745	-0.324901	0.0960193
Q9BXD5	NPL	N-acetylneuraminate lyase	16.7602	16.8678	17.2605	16.5827	17.5266	17.4556	17.0754	17.3039	16.5533	17.1829	16.7863	17.0193	16.8904	16.8984	17.172	17.3475	17.3437	16.958	-0.337515	0.0950354
Q06481	APLP2	Amyloid-like protein 2	17.2501	17.8846	17.3449	17.4538	17.7982	17.8916	17.621	17.7566	18.1429	18.0446	17.6852	17.4455	17.5766	17.9575	17.7143	18.0147	17.9145	17.9932	-0.425838	0.0341194
Q9GZP0	PDGFD	Platelet-derived growth factor D	16.7278	16.8231	16.7953	16.5533	17.2979	17.2356	16.8187	17.4614	17.1126	17.9167	16.66	16.6497	16.7594	16.8432	17.3253	17.4153	16.9836	17.1815	-0.501572	0.00420078
P78386	KRT85	Keratin, type II cuticular Hb5	18.2802	18.3092	18.4028	17.8126	18.5694	18.3462	18.3639	18.9229	18.3899	19.5771	19.2164	18.2492	18.6871	20.1612	19.1069	18.3668	19.9833	18.6871	-0.834845	0.0672399

## Sheet: MCI vs SMI
Accession	Gene name	Description	AD-1	AD-2	AD-3	AD-4	MCI-A(+)-1	MCI-A(+)-2	MCI-A(+)-3	MCI-A(+)-4	MCI-A(+)-5	MCI-A(-)-1	MCI-A(-)-2	MCI-A(-)-3	MCI-A(-)-4	MCI-A(-)-5	SMI-1	SMI-2	SMI-3	SMI-4	log2 FC	p value
P61009	SPCS3	Signal peptidase complex subunit 3	17.4479	16.9475	18.2275	17.7341	18.185	18.0185	17.4713	17.2979	18.2822	18.0925	18.6314	17.4268	17.79	17.1787	17.6679	17.1234	17.1787	16.9874	0.598053	0.0410211
P56202	CTSW	Cathepsin W	16.2802	16.0446	15.8291	16.6726	17.322	16.7861	16.5256	16.4755	16.4913	17.0758	16.4833	16.362	15.9937	16.2655	16.4865	15.7252	15.8621	16.0029	0.558898	0.0270278
O43760-2	SYNGR2	Isoform 2 of Synaptogyrin-2	18.6275	17.654	18.2394	17.4543	18.1499	18.3403	17.8531	18.4255	17.9068	18.3302	17.9402	17.9117	18.1842	18.2004	17.3319	17.6791	17.6973	17.5995	0.547291	0.000561783
Q96C90	PPP1R14B	Protein phosphatase 1 regulatory subunit 14B	13.9016	14.6219	14.1538	15.3988	14.9581	14.6622	14.7018	14.9544	14.7734	15.0813	14.4171	14.3167	13.4201	14.3351	14.1315	14.3566	13.9221	13.7109	0.531775	0.0635977
Q14204	DYNC1H1	Cytoplasmic dynein 1 heavy chain 1	20.2637	20.3334	20.875	20.4931	21.3372	20.4398	20.9382	20.5509	20.5592	20.9532	20.6559	20.4477	20.5973	20.5877	20.4961	20.1229	20.1474	20.0998	0.490156	0.00837635
P12724	RNASE3	Eosinophil cationic protein	17.548	17.4468	17.2704	17.1217	16.9671	18.0635	17.1222	17.9813	17.522	17.1902	17.625	18.5237	17.3535	17.6627	16.9309	17.2251	17.3544	17.0945	0.449903	0.0996838
Q96E17	RAB3C	Ras-related protein Rab-3C	18.5726	18.6185	19.975	19.0291	20.059	19.6346	19.175	19.2379	19.4635	19.7651	19.3101	18.8099	19.2156	18.972	19.0316	19.436	18.7276	18.6617	0.400067	0.0922005
P51648-2	ALDH3A2	Isoform 2 of Fatty aldehyde dehydrogenase	17.3968	17.6193	17.8779	17.0913	17.8426	17.9253	17.8238	17.6975	17.3813	17.6897	17.822	17.4776	17.8951	17.5262	17.1249	17.7374	17.4631	16.95	0.389282	0.0177781
Q03518	TAP1	Antigen peptide transporter 1	18.3638	17.3835	18.4057	18.1811	18.4207	18.4603	17.8309	18.0861	18.2717	18.4283	17.6629	17.9492	18.0184	18.0276	17.9899	17.8741	17.6248	17.4494	0.381046	0.0317965
P62701	RPS4X	40S ribosomal protein S4, X isoform	18.9975	19.0865	18.9058	18.6172	19.1903	19.3969	19.2771	19.3049	18.6763	19.1151	18.9824	19.2771	18.9363	19.339	18.8598	18.3635	19.1015	18.7887	0.371177	0.0263576
Q96JJ3	ELMO2	Engulfment and cell motility protein 2	18.2253	17.5924	18.1719	17.9288	18.5478	18.2275	18.0151	18.1519	18.1545	17.9757	17.8521	17.7516	17.8375	17.8686	17.7965	17.4799	17.6994	17.6994	0.369409	0.0139642
P62244	RPS15A	40S ribosomal protein S15a	16.5245	16.3075	16.5106	16.0681	17.0368	17.1625	16.4377	17.1523	16.3223	16.9312	16.334	16.7799	16.5599	16.7996	16.4963	16.3921	16.2913	16.4808	0.336511	0.0681809
Q14642	INPP5A	Type I inositol 1,4,5-trisphosphate 5-phosphatase	18.7924	18.1694	18.3487	18.2339	18.2993	18.3506	18.5582	18.4142	18.16	18.9329	17.9121	18.5055	18.2375	18.3231	17.7945	18.0485	17.8531	18.4652	0.329008	0.0686116
Q9BRF8	CPPED1	Serine/threonine-protein phosphatase CPPED1	17.628	17.5101	17.8927	17.5652	18.16	18.1066	17.3268	17.9467	17.9986	18.0364	17.6209	18.1873	17.6096	18.2472	17.8147	17.7356	17.6818	17.1794	0.321107	0.095096
O75843	AP1G2	AP-1 complex subunit gamma-like 2	16.5958	16.5609	16.6082	16.4944	16.8112	16.7058	16.4585	16.256	16.6177	16.5955	16.5055	16.6189	16.3946	16.5599	16.4225	15.8579	16.4409	16.2349	0.313335	0.0175512
O60826	CCDC22	Coiled-coil domain-containing protein 22	17.1207	17.3384	17.4946	17.3437	17.4727	17.4012	17.5668	17.546	17.3568	17.5531	17.2282	17.3682	17.2015	17.0894	17.2263	17.1922	17.2043	16.7247	0.291525	0.0214274
P16615	ATP2A2	Sarcoplasmic/endoplasmic reticulum calcium ATPase 2	21.4518	20.0613	21.1298	20.9247	20.9247	21.145	20.7219	20.9634	20.8541	20.931	20.4264	21.043	20.8299	20.8378	20.7421	20.5037	20.3123	20.7614	0.287854	0.0314548
Q9UI08-2	EVL	Isoform 1 of Ena/VASP-like protein	15.3735	15.338	14.914	15.1886	15.3704	15.2809	15.2801	15.4997	15.4616	15.4122	15.376	15.4121	15.4404	15.4451	15.2068	14.7499	15.3239	15.2965	0.253607	0.0133716
A1A4S6	ARHGAP10	Rho GTPase-activating protein 10	19.3219	19.1381	19.4916	19.4847	19.5224	19.5138	19.4619	19.2665	19.4262	19.4353	19.1597	19.3661	19.235	19.3739	19.3185	18.9035	19.5213	18.776	0.246232	0.0635963
Q15052	ARHGEF6	Rho guanine nucleotide exchange factor 6	18.6702	19.0986	18.9521	18.731	18.7888	18.9744	18.7252	19.2918	18.8519	18.6741	18.7856	19.0833	18.831	18.8907	18.8028	18.4465	18.7951	18.6258	0.222149	0.0595817
P42345	MTOR	Serine/threonine-protein kinase mTOR	17.6578	17.9459	17.7677	17.8215	17.9838	17.7667	17.8046	18.0012	17.938	17.9499	17.7034	17.7124	17.591	17.6529	17.7356	17.5609	17.7124	17.371	0.215386	0.0353501
O15027-5	SEC16A	Isoform 5 of Protein transport protein Sec16A	16.909	17.0803	17.0638	16.8182	17.2318	17.2554	16.9375	16.5816	16.9553	17.1303	17.0045	17.0981	17.1109	16.8261	16.9244	16.6854	16.9897	16.5958	0.214345	0.0931939
Q9Y6G9	DYNC1LI1	Cytoplasmic dynein 1 light intermediate chain 1	18.5185	18.8843	18.8106	18.7592	18.9649	18.5275	19.1322	18.6293	18.7343	18.7776	18.9915	18.7844	18.9915	18.8565	18.6046	18.3992	18.8337	18.6782	0.210064	0.0772498
Q8IUR7	ARMC8	Armadillo repeat-containing protein 8	16.8904	16.875	17.0312	16.7819	17.2224	17.1456	16.618	16.9594	16.8374	17.1474	16.9768	16.6692	16.9425	16.7024	16.8481	16.684	16.7304	16.5926	0.208317	0.0912573
Q9BZH6	WDR11	WD repeat-containing protein 11	18.9282	19.0547	18.7869	18.7544	18.9834	18.7457	18.9671	18.8574	18.7653	18.8378	18.8178	18.9736	19.0003	18.915	18.7564	18.4432	18.8206	18.6968	0.207099	0.0107413
Q8NEW0	SLC30A7	Zinc transporter 7	17.0196	16.675	16.6906	17.0516	16.6749	16.6619	16.7951	16.6348	16.9193	16.7128	16.7925	16.6897	17.0378	16.8926	16.7861	16.3664	16.5432	16.6358	0.198249	0.0387235
Q7L576	CYFIP1	Cytoplasmic FMR1-interacting protein 1	20.9677	21.1958	21.5482	21.2937	21.58	21.409	21.4879	21.5367	21.3065	21.4644	21.1595	21.344	21.1505	21.3237	21.2728	21.2158	21.2566	20.9677	0.197987	0.0408433
P42224	STAT1	Signal transducer and activator of transcription 1-alpha/beta	17.9273	18.0945	18.2746	18.0774	18.2948	18.2822	18.1208	18.1811	18.1519	18.4267	18.6672	18.1369	18.3135	18.2441	18.2326	18.0509	18.1285	17.9349	0.195202	0.0565385
Q9H270	VPS11	Vacuolar protein sorting-associated protein 11 homolog	17.47	17.6897	17.4986	17.661	17.7166	17.6986	17.7122	17.8601	17.7156	17.6271	17.5838	17.6365	17.4453	17.6773	17.6374	17.2288	17.7196	17.303	0.195088	0.051888
Q5XPI4-2	RNF123	Isoform 2 of E3 ubiquitin-protein ligase RNF123	17.3987	17.307	17.4119	17.1073	17.4938	17.4677	17.0716	17.3993	16.9562	17.3176	17.2798	17.1836	17.5331	17.4616	17.0691	17.0605	17.1914	17.1686	0.194011	0.0794716
Q8IWB7	WDFY1	WD repeat and FYVE domain-containing protein 1	19.0082	18.9188	19.3193	19.1399	19.4082	19.2383	19.1516	19.1455	19.1691	19.3405	19.1126	18.8727	19.1209	18.8258	19.0776	18.8798	18.9188	18.9036	0.193568	0.0675828
Q6P589	TNFAIP8L2	Tumor necrosis factor alpha-induced protein 8-like protein 2	17.0841	17.4676	17.3063	17.2951	17.8203	17.4255	17.5342	17.633	17.5758	17.633	17.5274	17.3583	17.6906	17.3551	17.4186	17.3925	17.2988	17.347	0.191078	0.0298487
O15204	ADAMDEC1	ADAM DEC1	18.0164	17.7247	17.9395	17.7319	17.8317	18.0582	17.7032	17.966	17.9444	17.9056	18.01	18.0306	17.8693	18.0682	17.6975	17.6623	17.6461	17.9863	0.190656	0.0265934
O00186	STXBP3	Syntaxin-binding protein 3	18.8232	18.3055	18.3783	18.4488	18.1866	18.3947	18.4493	18.3764	18.257	18.2663	17.9681	18.488	18.2071	18.4197	18.1743	18.1274	17.9835	18.1582	0.190461	0.0434492
Q9H267	VPS33B	Vacuolar protein sorting-associated protein 33B	18.1138	18.1438	18.2853	18.2907	18.5012	18.2577	18.285	18.4192	18.2614	18.2543	18.0616	18.3281	18.1938	18.2115	18.3317	17.8361	18.2176	17.9746	0.187382	0.0620558
Q96D46	NMD3	60S ribosomal export protein NMD3	17.2944	17.5113	17.1516	17.0452	17.36	17.2258	17.2363	17.0901	17.0778	17.3017	17.5113	17.3331	17.4061	17.0692	17.0892	17.1441	17.2872	16.8066	0.17936	0.0896784
P19634	SLC9A1	Sodium/hydrogen exchanger 1	17.32	16.5577	16.9517	16.9403	16.7901	16.9309	16.8055	17.1551	16.8826	16.9752	16.9609	16.5141	16.8994	16.9595	16.6119	16.8436	16.6296	16.7687	0.173886	0.0806576
Q92558	WASF1	Wiskott-Aldrich syndrome protein family member 1	17.8277	18.1375	18.0202	17.9629	18.1479	18.0238	18.0296	18.1126	18.0386	18.0238	18.1555	18.1989	18.2331	17.9015	17.8769	17.6633	18.1086	18.0114	0.171466	0.0455592
Q96AX1	VPS33A	Vacuolar protein sorting-associated protein 33A	16.6197	16.7654	16.9424	17.1615	16.9904	16.9262	17.0988	16.9912	16.8344	16.9112	16.7855	17.0577	16.9948	17.0042	16.9467	16.7692	16.6113	16.8361	0.168641	0.0226205
O95372	LYPLA2	Acyl-protein thioesterase 2	18.2	18.2376	18.3289	18.3211	18.5254	18.3317	18.1719	18.3497	18.3806	18.4078	18.0943	18.1702	18.143	18.1122	18.214	18.0936	18.1558	17.9426	0.16721	0.0683192
P19525	EIF2AK2	Interferon-induced, double-stranded RNA-activated protein kinase	18.6709	18.51	18.5788	18.8349	18.7442	18.7685	18.7277	18.5745	18.7046	18.7653	19.0358	18.6722	18.7997	18.7347	18.8605	18.5596	18.5002	18.4243	0.166574	0.0666845
P51114	FXR1	Fragile X mental retardation syndrome-related protein 1	18.5711	18.8351	18.731	18.7068	18.924	18.8262	18.7388	18.7094	18.7429	18.8857	18.806	18.7072	18.8731	18.7907	18.4993	18.5566	18.7669	18.7215	0.164292	0.0108531
O43813	LANCL1	Glutathione S-transferase LANCL1	19.8875	19.572	19.762	19.8527	19.9119	19.8196	19.7974	19.8421	19.8756	19.7595	19.7699	19.5175	19.8434	19.6426	19.6969	19.7108	19.5635	19.5279	0.153177	0.03924
Q9H9C1	VIPAS39	Spermatogenesis-defective protein 39 homolog	16.6616	16.5775	16.6442	16.5636	16.5646	16.6816	16.5846	16.6297	16.6209	16.7143	16.4858	16.5631	16.3917	16.5457	16.481	16.3958	16.5178	16.3323	0.146472	0.0186643
Q96CW1	AP2M1	AP-2 complex subunit mu	19.1031	18.9236	19.0586	19.0001	19.0507	19.1359	18.9846	19.0939	19.0867	19.0909	18.8008	19.0448	18.8739	19.0081	18.9927	18.7822	19.0081	18.7003	0.146222	0.060777
O00231-2	PSMD11	Isoform 2 of 26S proteasome non-ATPase regulatory subunit 11	19.0589	19.2584	19.3914	19.2273	19.4101	19.3517	19.2767	19.2466	19.2288	19.3687	19.1698	19.2385	19.1586	19.179	19.1636	18.9553	19.2164	19.1487	0.14183	0.0269693
Q99598	TSNAX	Translin-associated protein X	17.8721	17.8513	18.0888	18.1088	18.2068	18.0787	17.7686	17.8885	18.1193	18.0736	17.9297	17.967	17.8916	17.9278	17.9838	17.7634	17.7706	17.86	0.140689	0.0810571
Q08AM6	VAC14	Protein VAC14 homolog	16.9169	17.0583	16.7605	16.9095	16.885	16.9294	17.1173	17.0758	16.8457	16.8355	17.0268	17.0087	17.1186	17.1251	16.8962	16.7618	16.8554	16.9187	0.138742	0.0460846
Q8N9N7	LRRC57	Leucine-rich repeat-containing protein 57	18.5831	18.6855	18.6942	18.5683	18.7954	18.7397	18.7285	18.7336	18.6686	18.7832	18.7023	18.6463	18.6423	18.5029	18.6243	18.5317	18.6517	18.4267	0.135689	0.0250371
O43242	PSMD3	26S proteasome non-ATPase regulatory subunit 3	19.0989	19.2524	18.9812	19.1529	19.0982	19.0909	19.1949	19.2145	19.1405	19.0555	19.1551	19.2365	19.1693	19.1949	19.0296	18.9893	19.2109	18.8722	0.129525	0.0266793
O75165	DNAJC13	DnaJ homolog subfamily C member 13	18.0367	17.9894	18.0831	18.1099	17.8968	18.0795	18.1046	18.0276	17.9878	17.9998	17.9674	18.2342	17.9206	18.1167	18.0202	17.7953	17.9894	17.8195	0.127396	0.0635121
P07332	FES	Tyrosine-protein kinase Fes/Fps	17.7319	17.9421	17.9246	17.8758	18.0902	17.7733	17.7221	17.6999	17.8708	17.9751	17.8176	17.9216	17.8832	17.9618	17.8426	17.7319	17.6973	17.7221	0.123068	0.0838515
Q92900	UPF1	Regulator of nonsense transcripts 1	18.3671	18.4499	18.4993	18.5073	18.6106	18.482	18.5825	18.5158	18.6741	18.5513	18.6252	18.3414	18.4291	18.4363	18.4579	18.4078	18.4141	18.3402	0.119826	0.0497105
Q9Y2L5	TRAPPC8	Trafficking protein particle complex subunit 8	17.8322	17.8657	17.7842	17.9467	17.9151	17.9563	17.8452	17.7802	17.8952	17.9698	17.9695	17.8965	17.7717	17.9326	17.8569	17.7351	17.885	17.648	0.111957	0.0429596
P32019	INPP5B	Type II inositol 1,4,5-trisphosphate 5-phosphatase	18.0746	18.3399	18.3868	18.318	18.3868	18.4084	18.256	18.3806	18.3999	18.3426	18.4458	18.2081	18.2296	18.1749	18.2275	18.2282	18.2047	18.1901	0.110663	0.0467321
Q5GLZ8	HERC4	Probable E3 ubiquitin-protein ligase HERC4	17.5169	17.4487	17.428	17.3827	17.6489	17.4968	17.4946	17.6416	17.4482	17.5334	17.3878	17.5732	17.5784	17.5847	17.5566	17.5145	17.4232	17.2236	0.109298	0.0990331
P46734-3	MAP2K3	Isoform 2 of Dual specificity mitogen-activated protein kinase kinase 3	19.1299	19.2996	19.3349	19.1455	19.3136	19.2878	19.224	19.3173	19.2716	19.3485	19.1517	19.4283	19.0888	19.2549	19.195	19.1782	19.1911	19.1233	0.0967819	0.0804846
Q9Y2I8-2	WDR37	Isoform 2 of WD repeat-containing protein 37	18.5763	18.9203	18.5003	18.7381	18.6209	18.4532	18.5479	18.5566	18.7255	18.4965	18.5814	18.6142	18.4661	18.4615	18.6741	18.6117	18.7495	18.5569	-0.095669	0.0843585
P62330	ARF6	ADP-ribosylation factor 6	18.6017	18.8182	18.7457	18.846	18.6528	18.7564	18.7673	18.8072	18.8588	18.7046	18.8382	18.8182	18.6935	18.77	18.6985	18.9861	18.8077	18.9612	-0.0966892	0.0913251
P46109	CRKL	Crk-like protein	19.6692	19.9029	19.8611	19.7416	19.8758	19.9037	19.7982	19.8199	19.8357	19.8611	19.8138	19.7145	19.705	19.6618	19.7907	20.0667	19.8257	19.9061	-0.0983402	0.0977116
Q9Y6Y8	SEC23IP	SEC23-interacting protein	17.9504	18.2615	18.0706	17.9714	18.0706	18.0608	18.1238	18.077	18.0438	18.0147	18.1517	18.17	17.8969	18.1359	18.1811	18.1719	18.1949	18.1508	-0.100144	0.0321619
P30419	NMT1	Glycylpeptide N-tetradecanoyltransferase 1	17.7594	18.17	17.9481	17.8741	17.9883	17.9698	18.0153	18.0706	17.913	17.9981	18.0819	18.0378	17.8305	17.9709	18.014	18.1529	17.9685	18.2383	-0.105785	0.0693176
Q4V328	GRIPAP1	GRIP1-associated protein 1	17.9157	18.1293	17.8646	18.0294	17.8828	17.9195	18.0007	17.898	18.0542	18.04	18.1264	18.1434	17.9648	18.0084	18.013	18.0803	18.0467	18.3171	-0.110457	0.0980357
Q8TE77	SSH3	Protein phosphatase Slingshot homolog 3	17.4056	17.7172	17.8858	17.8678	17.8638	17.6809	17.7803	17.7607	17.7975	17.7433	17.7033	17.7803	17.6252	17.6001	17.7953	17.9174	17.8556	17.8093	-0.110882	0.0290156
Q16539	MAPK14	Mitogen-activated protein kinase 14	18.4645	18.8383	18.7494	18.9164	18.9123	18.8659	18.9276	18.9109	18.7637	18.7717	18.7893	18.7575	18.6861	18.7467	18.8479	19.1562	18.7955	18.9262	-0.118306	0.0884868
Q9H2J4	PDCL3	Phosducin-like protein 3	16.8051	17.3156	17.376	17.211	17.2971	17.2955	17.0324	17.3495	17.2103	17.4207	17.3556	17.1676	17.2366	17.1389	17.4029	17.5348	17.2834	17.3042	-0.130896	0.0813506
Q9Y266	NUDC	Nuclear migration protein nudC	17.9139	18.0886	17.8404	17.9689	17.9641	17.7945	17.9949	17.8317	17.9315	17.9094	18.0814	18.0814	18.0539	18.0407	18.0255	18.0353	18.1614	18.1833	-0.133025	0.0389693
Q9NVZ3-2	NECAP2	Isoform 2 of Adaptin ear-binding coat-associated protein 2	17.7164	17.8748	17.6783	17.7355	17.8032	17.6272	17.8264	17.7867	17.771	17.8215	17.8847	17.8847	17.7693	17.8091	17.9623	18.0606	17.7478	17.9554	-0.133155	0.0292658
Q9UMY4	SNX12	Sorting nexin-12	17.9784	18.2773	18.2171	18.0907	18.214	18.1818	18.1333	18.0942	18.1009	18.2068	18.1894	18.3115	18.0735	18.028	18.2853	18.1866	18.2718	18.4287	-0.13976	0.0197263
P0DMM9-3	SULT1A3	Isoform 3 of Sulfotransferase 1A3	18.4968	18.7122	18.6649	18.4316	18.6604	18.6556	18.4807	18.8765	18.4902	18.4933	18.4339	18.5538	18.6996	18.4999	18.7131	18.5926	18.744	18.8584	-0.142633	0.0891806
P07741	APRT	Adenine phosphoribosyltransferase	19.0157	19.1471	18.9456	18.9744	19.0887	18.8641	18.9881	18.9184	18.921	18.9631	19.1683	19.0602	18.914	18.8861	18.9329	19.3536	19.1287	19.0729	-0.144815	0.0686253
Q8IV38	ANKMY2	Ankyrin repeat and MYND domain-containing protein 2	17.7949	18.1295	17.9813	18.1694	18.0031	18.0781	17.9867	17.9423	17.9491	17.8864	18.0673	18.1512	18.0919	17.9187	18.0227	17.9698	18.2736	18.3449	-0.145266	0.0607275
P11047	LAMC1	Laminin subunit gamma-1	17.5586	17.5311	17.392	17.4492	17.434	17.6298	17.4931	17.6773	17.5023	17.5273	17.3618	17.3961	17.4583	17.5125	17.3934	17.6416	17.7394	17.8113	-0.147153	0.0683025
Q9ULC4-3	MCTS1	Isoform 3 of Malignant T-cell-amplified sequence 1	18.6238	18.9472	18.7233	18.7035	18.7195	18.8203	18.8669	18.7769	18.7793	18.663	18.721	18.7801	18.7008	18.8245	18.7094	19.0939	18.8733	18.9734	-0.147292	0.0260331
P14621	ACYP2	Acylphosphatase-2	16.1421	17.151	17.1009	17.1249	17.0852	17.1281	17.0172	17.036	17.1408	17.0314	17.3824	17.1285	17.2501	16.948	17.2286	17.2125	17.3328	17.2814	-0.149051	0.0444768
Q9UGJ0	PRKAG2	5'-AMP-activated protein kinase subunit gamma-2	16.7511	17.0337	16.9524	16.9244	17.0251	16.8938	16.9447	17.1792	16.9489	17.0086	16.9706	16.8978	16.88	16.7217	17.0764	17.2841	17.0691	16.9588	-0.150096	0.0606338
O95319-3	CELF2	Isoform 3 of CUGBP Elav-like family member 2	18.4942	18.3687	18.0942	18.1292	18.0227	18.0562	18.1893	18.0643	18.2013	18.0469	18.3114	18.1462	18.2538	18	18.3258	18.0501	18.3591	18.4125	-0.157678	0.0506379
Q9UHY1	NRBP1	Nuclear receptor-binding protein	18.7691	19.149	18.9545	18.9013	19.1033	18.9396	19.0693	19.1496	18.9377	18.972	19.139	18.9251	18.9443	18.9263	19.2549	19.3349	19.0065	19.0808	-0.158639	0.0324684
Q14240-2	EIF4A2	Isoform 2 of Eukaryotic initiation factor 4A-II	18.5483	18.9902	18.6823	18.9229	18.8502	18.7287	18.8668	19.0517	18.8392	18.8508	18.7693	18.7389	18.7063	18.687	19.0982	19.1819	18.7925	18.7996	-0.159175	0.0740598
P23381	WARS	Tryptophan--tRNA ligase, cytoplasmic	18.8673	19.0886	19.2441	18.8715	19.2145	19.1088	18.842	19.0776	18.8213	18.9511	19.0578	19.0102	18.8076	18.9166	19.0543	19.3882	19.0615	19.0635	-0.161131	0.0823677
P16930	FAH	Fumarylacetoacetase	18.6209	18.4394	18.7376	18.7585	18.7758	18.7367	18.6654	18.8301	18.7133	18.8405	18.838	18.6856	18.642	18.939	18.868	19.1146	18.8661	18.8801	-0.165562	0.0178262
Q96DB5	RMDN1	Regulator of microtubule dynamics protein 1	17.5287	17.7175	17.4756	17.2032	17.3668	17.4052	17.4809	17.4727	17.3337	17.5203	17.4762	17.4512	17.5368	17.5426	17.4119	17.8589	17.6479	17.596	-0.170061	0.023108
Q8IUD2	ERC1	ELKS/Rab6-interacting/CAST family member 1	17.7527	18.3341	18.2403	18.0587	18.2692	18.1893	18.0357	18.2156	18.0492	18.241	17.9857	18.1393	17.9826	18.0529	18.0688	18.5326	18.2317	18.3207	-0.172395	0.0509301
Q14112	NID2	Nidogen-2	18.8215	19.1968	18.5566	18.9446	19.0049	18.8933	19.0145	18.773	18.8685	18.9801	18.9543	19.0734	18.9649	19.0501	18.8358	19.0963	19.1612	19.4282	-0.172692	0.0668278
O76003	GLRX3	Glutaredoxin-3	18.0515	18.0613	17.9743	17.8663	17.9916	17.8906	17.88	18.0973	17.7642	17.9629	17.8211	17.8648	17.9544	17.9879	17.898	18.229	18.0297	18.2282	-0.174746	0.0260231
O00170	AIP	AH receptor-interacting protein	17.6188	17.9799	17.4183	17.2818	17.5388	17.4029	17.1013	17.2587	17.4435	17.315	17.4229	17.2529	17.3148	17.1418	17.4153	17.551	17.5368	17.4805	-0.176637	0.0312532
Q9HAB8	PPCS	Phosphopantothenate--cysteine ligase	18.451	18.7535	18.6812	18.7208	18.6322	18.6447	18.6941	18.6823	18.663	18.6686	18.8679	18.6609	18.7594	18.7342	18.6791	18.9784	19.0591	18.797	-0.177663	0.0147686
Q01469	FABP5	Fatty acid-binding protein 5	17.0766	17.2676	16.8593	17.0304	17.0758	16.8974	16.9128	16.7631	17.0239	16.9731	17.1917	17.1755	16.8569	16.8942	17.0942	17.1285	17.0434	17.3782	-0.184652	0.0481146
Q6PKG0	LARP1	La-related protein 1	17.3998	17.4263	17.4669	17.4811	17.6285	17.4086	17.5962	17.5016	17.5073	17.537	17.4731	17.461	17.3315	17.4713	17.7648	17.6285	17.6371	17.6847	-0.187176	0.00202113
Q15121-2	A15	Isoform 2 of Astrocytic phosphoprotein PEA-15	17.9618	17.6914	17.6897	17.6633	17.438	17.7239	17.4641	17.5323	17.6162	17.6285	17.5331	17.3629	17.673	17.4969	17.4556	17.8788	17.6385	17.9692	-0.188644	0.0577004
P02545	LMNA	Prelamin-A/C	18.6061	18.8413	18.2993	18.5926	18.4716	18.4221	18.7098	18.4422	18.5232	18.4134	18.702	18.4869	18.5814	18.4611	18.5197	18.585	18.7059	19.0334	-0.189618	0.0513504
P61018-2	RAB4B	Isoform 2 of Ras-related protein Rab-4B	18.6348	18.7267	18.3372	18.8324	18.5467	18.8192	18.5428	18.7007	18.831	18.3258	18.6156	18.4727	18.3795	18.3795	18.7653	18.7695	18.6292	18.8419	-0.190122	0.0707608
Q9NVJ2	ARL8B	ADP-ribosylation factor-like protein 8B	19.2501	18.6658	19.0768	18.9597	18.9341	19.0168	18.8363	18.9744	18.847	18.9059	18.5564	18.7538	18.7803	18.9547	19.1265	19.1509	18.7846	19.1318	-0.192492	0.0464352
O00233	PSMD9	26S proteasome non-ATPase regulatory subunit 9	18.0784	18.235	18.1066	18.1499	18.0515	18.1178	18.1119	18.0244	18.1151	18.1161	18.2458	18.1603	18.2677	18.2408	18.4512	18.3436	18.2374	18.3198	-0.192873	0.00219143
Q96KP4	CNDP2	Cytosolic non-specific dipeptidase	19.2736	19.6911	19.6407	19.4686	19.5159	19.5634	19.5111	19.6037	19.417	19.4962	19.4832	19.4171	19.2849	19.4496	19.4669	19.9037	19.5013	19.815	-0.197506	0.0287212
P06753	TPM3	Tropomyosin alpha-3 chain	19.672	20.0293	19.6694	19.5725	19.8821	19.6055	19.6927	19.5815	19.4125	19.8134	19.4903	19.593	19.3747	19.5773	19.4999	19.7499	19.8468	20.1275	-0.203707	0.0954496
P02679	FGG	Fibrinogen gamma chain	22.855	22.7084	22.5357	23.2181	22.8869	22.8345	22.855	22.8345	23.1038	23.1038	23.0355	22.855	23.1135	22.855	23.1038	22.9828	23.3557	23.1745	-0.206469	0.0221377
Q15370-2	ELOB	Isoform 2 of Elongin-B	19.3547	19.5623	19.3705	19.5102	19.4015	19.3675	19.6368	19.4057	19.5771	19.4069	19.5578	19.6803	19.4113	19.4399	19.6397	19.6128	19.7166	19.8385	-0.213434	0.0067224
P43487	RANBP1	Ran-specific GTPase-activating protein	18.3672	18.6926	19.0283	18.7419	18.9519	18.9746	18.569	18.6053	18.8637	18.7741	18.6992	18.6874	18.4023	18.4893	18.8112	19.1289	18.6959	19.0273	-0.214177	0.0853972
P62942	FKBP1A	Peptidyl-prolyl cis-trans isomerase FKBP1A	17.0867	17.2813	17.1004	17.5043	16.9682	16.9881	17.1882	16.9876	17.2356	16.8396	17.3787	17.0515	17.17	17.2052	17.4748	17.5008	17.0625	17.2459	-0.219714	0.0534472
P68106	FKBP1B	Peptidyl-prolyl cis-trans isomerase FKBP1B	16.0389	16.6598	16.1952	16.131	16.1128	16.2147	16.1097	15.9889	16.2551	16.4082	16.1697	16.2977	16.3749	16.0149	16.1893	16.6133	16.6151	16.2554	-0.223642	0.0437167
O75674	TOM1L1	TOM1-like protein 1	16.2069	16.6491	16.7618	16.6337	16.8046	16.6055	16.5855	16.6092	16.3293	16.6092	16.5413	16.3847	16.64	16.535	16.5184	17.0258	16.7707	16.8442	-0.22536	0.030857
P61970	NUTF2	Nuclear transport factor 2	18.0458	18.3693	18.0581	18.1886	18.1274	18.1044	17.9106	17.5975	18.0742	18.0598	18.0476	18.0919	17.8504	18.0028	18.2357	18.1632	18.1421	18.3693	-0.240901	0.0186383
O60841	EIF5B	Eukaryotic translation initiation factor 5B	18.4405	18.1223	18.1818	18.331	18.1469	18.2191	17.8384	17.8555	18.2783	18.0515	17.8743	17.9602	17.9893	17.767	18.2128	18.2345	18.1974	18.3322	-0.246155	0.0183826
Q9Y240	CLEC11A	C-type lectin domain family 11 member A	18.5195	18.9822	18.8703	18.6541	18.6782	18.6711	18.65	18.8128	18.6303	18.3743	18.806	18.1851	18.8408	18.4598	18.7757	19.12	18.5694	18.9669	-0.247194	0.0798923
P09972	ALDOC	Fructose-bisphosphate aldolase C	19.8647	20.0745	19.8356	20.0124	20.0297	19.7554	19.9843	20.3654	19.8691	19.9742	20.0901	20.1037	19.6912	20.166	19.8833	20.3759	20.166	20.5815	-0.248791	0.0893476
P28070	PSMB4	Proteasome subunit beta type-4	17.2731	18.0057	17.8059	17.6184	17.9288	17.6951	17.1394	17.9103	17.7406	17.6135	17.7976	17.6454	17.5475	17.5005	17.7602	18.0066	17.8904	17.9465	-0.24909	0.0627345
P23284	PPIB	Peptidyl-prolyl cis-trans isomerase B	20.3985	20.69	20.1745	20.6504	20.4051	20.3309	20.5082	20.5814	20.555	20.2737	20.4322	20.5585	20.1954	20.4085	20.3637	20.7203	20.5905	21.0277	-0.250685	0.0350416
O60869	EDF1	Endothelial differentiation-related factor 1	14.6347	14.7419	14.6679	15.0086	15.134	14.693	14.7325	15.2637	14.5602	14.9312	14.5087	14.5958	14.8646	14.7732	15.0749	15.144	14.8291	15.1866	-0.252975	0.0855416
P16455	MGMT	Methylated-DNA--protein-cysteine methyltransferase	18.4291	18.3126	18.1232	18.0515	18.2958	18.0883	18.2153	18.331	18.0819	18.1171	18.1717	18.2945	18.4509	18.2314	18.3959	18.8588	18.413	18.2672	-0.255954	0.0221914
Q7Z2Z2	EFL1	Elongation factor-like GTPase 1	18.4014	18.6888	18.6303	18.3999	18.6163	18.6756	18.4666	18.8392	18.4084	18.4627	18.5137	18.4196	18.5305	18.3898	18.4292	18.8659	18.5903	19.2782	-0.258673	0.072919
Q9H4A5	GOLPH3L	Golgi phosphoprotein 3-like	17.0673	17.4788	17.382	17.3176	17.5448	17.5499	17.5045	17.3859	17.1551	17.3065	17.3019	17.3282	17.0044	17.3081	17.4284	17.8968	17.4432	17.6523	-0.266236	0.0315282
Q9Y6I3-1	EPN1	Isoform 2 of Epsin-1	18.1191	18.2544	17.9611	17.9481	17.9195	17.7965	18.2151	17.5914	17.7988	17.7699	18.189	18.0688	17.8101	17.9625	18.229	17.8758	18.1992	18.4729	-0.282099	0.0434317
Q96EK5	KIF1BP	KIF1-binding protein	15.4762	15.6269	15.4026	15.3525	15.2033	15.2565	15.4928	15.4717	15.1975	15.4076	15.6249	15.5583	15.1754	15.4415	15.8536	15.3712	15.6905	15.7541	-0.284424	0.0179276
P35244	RPA3	Replication protein A 14 kDa subunit	16.1589	16.5242	16.361	16.4027	16.1776	16.2469	15.8193	16.309	16.2738	15.9366	16.2018	16.3456	16.1608	15.998	16.3081	16.3792	16.6563	16.3889	-0.2862	0.0139911
Q9Y547	HSPB11	Intraflagellar transport protein 25 homolog	16.4457	17.0251	16.9752	16.7199	16.7519	16.9193	16.829	16.277	16.6816	16.8751	17.2892	16.9503	16.6568	16.7329	16.9124	17.2191	16.959	17.3103	-0.303904	0.0564809
Q9HCN6	GP6	Platelet glycoprotein VI	18.8461	18.8929	19.7072	19.0253	19.2101	19.3173	18.9112	19.2878	19.1439	19.0754	18.827	18.6854	18.8594	18.8783	19.1691	19.8848	19.0535	19.2184	-0.311866	0.0701651
Q9GZX9	TWSG1	Twisted gastrulation protein homolog 1	16.3167	17.0354	16.3098	16.6816	16.4688	16.3983	16.5387	16.2832	16.382	16.2891	17.0387	17.0279	16.3428	16.7055	16.4279	16.9682	16.8784	17.1797	-0.316079	0.0935445
P46926	GNPDA1	Glucosamine-6-phosphate isomerase 1	17.7972	17.6913	17.1895	17.1065	17.301	17.3495	17.3477	17.3243	17.392	17.108	17.5619	17.3356	17.1869	17.3034	17.7166	17.5531	17.488	17.8116	-0.321275	0.00110377
P05067	APP	Amyloid-beta precursor protein	20.8775	21.0217	20.0787	20.4892	20.3637	20.3583	20.8308	20.4509	20.6947	20.6056	20.796	20.8723	20.7359	20.8373	21.4417	20.6452	20.8677	21.1586	-0.373763	0.0238718
Q92973	TNPO1	Transportin-1	18.2328	18.5832	18.1185	18.2655	18.1694	18.0172	18.4111	18.4225	17.8906	18.1369	18.4229	18.2996	18.3178	18.4088	19.1803	18.3269	18.5172	18.4958	-0.380346	0.0241621
Q9ULZ3	PYCARD	Apoptosis-associated speck-like protein containing a CARD	17.1619	17.299	16.4204	16.7588	16.5053	16.9899	17.2904	16.8365	17.0312	16.4005	16.5141	17.1822	16.2446	17.0349	17.062	16.9584	17.0926	17.7026	-0.400917	0.0803235
Q9H008	LHPP	Phospholysine phosphohistidine inorganic pyrophosphate phosphatase	17.7543	17.7584	17.1929	17.5016	17.1626	17.4097	17.4732	17.4327	17.5559	16.9199	17.7408	17.7408	17.4802	17.5642	17.8653	17.6087	17.7515	18.187	-0.40512	0.0174773
Q96AC1-3	FERMT2	Isoform 3 of Fermitin family homolog 2	18.5649	18.1773	17.9345	18.0373	17.9253	17.6056	17.967	17.6654	17.5667	17.7301	17.6592	18.4386	17.8681	18.0461	18.331	18.0973	18.3955	18.1987	-0.408428	0.0134787
Q9GZP8	IMUP	Immortalization up-regulated protein	17.1543	17.203	16.4175	16.0978	16.0953	15.9366	16.7841	16.5198	16.0551	16.172	16.5874	16.9813	17.035	16.9049	16.3942	16.8669	17.1796	17.5122	-0.481083	0.0840018
Q9NWV8	BABAM1	BRISC and BRCA1-A complex member 1	17.0097	17.1113	17.7512	16.9327	16.7415	16.9403	16.8713	16.4792	16.5884	16.7098	16.8927	16.9043	17.0107	16.8168	17.2459	17.9056	17.052	16.9769	-0.499592	0.00628226
P02751	FN1	Fibronectin	22.2019	22.9822	20.9634	22.0508	21.0665	21.1897	21.9645	21.4417	21.8272	21.2254	21.8676	21.646	22.2872	21.8676	21.9737	21.6188	23.3083	21.9325	-0.569974	0.0821158
Q96IJ6-2	GMPPA	Isoform 2 of Mannose-1-phosphate guanyltransferase alpha	17.7246	17.0789	17.3527	17.3661	17.3508	17.3297	16.4133	17.362	17.1463	17.2342	16.2607	16.2299	16.0163	16.2359	17.2653	17.6175	17.4961	16.9398	-0.571795	0.0838772
O75531	BANF1	Barrier-to-autointegration factor	14.224	15.129	14.0718	15.4698	13.6812	14.603	15.022	14.4584	14.4178	14.3829	15.4319	14.671	15.1188	14.9289	15.708	14.4109	15.3856	15.6464	-0.616132	0.0677528
O75460	ERN1	Serine/threonine-protein kinase/endoribonuclease IRE1	17.104	16.7135	16.6005	17.0414	16.5929	16.3884	17.3147	16.2551	16.6629	16.4175	17.5872	16.9401	17.3623	17.7392	17.7722	16.6998	17.387	18.9843	-0.78478	0.0707436
P02741	CRP	C-reactive protein	17.834	17.7959	17.4799	20.5433	17.571	17.5051	18.3447	17.5043	18.1171	17.5491	18.2074	18.2417	18.1581	17.8299	20.8373	17.6991	18.3114	18.6629	-0.974838	0.0472287
			26	27	25	28	23	24	22	16	17	13	12	15	6	10	1	3	4	5
						2

## Sheet: MCI-A(+) vs SMI
Accession	Gene name	Description	AD-1	AD-2	AD-3	AD-4	MCI-A(+)-1	MCI-A(+)-2	MCI-A(+)-3	MCI-A(+)-4	MCI-A(+)-5	MCI-A(-)-1	MCI-A(-)-2	MCI-A(-)-3	MCI-A(-)-4	MCI-A(-)-5	SMI-1	SMI-2	SMI-3	SMI-4	log2 FC	p value
P05166-2	PCCB	Isoform 2 of Propionyl-CoA carboxylase beta chain, mitochondrial	16.9207	14.6461	16.8002	16.694	16.7588	16.7194	15.9367	16.5636	16.4162	16.7533	14.8081	15.9367	13.4561	14.6461	16.3098	16.5362	14.1562	13.4561	1.36436	0.0912108
Q5VWC8	HACD4	Very-long-chain (3R)-3-hydroxyacyl-CoA dehydratase 4	17.3776	16.1531	20.0151	17.5094	19.6758	19.7533	17.6922	19.1803	18.4316	19.7233	17.0194	17.4604	17.5189	17.1972	18.5392	18.6163	16.963	16.8933	1.19365	0.0915707
P30613	PKLR	Pyruvate kinase PKLR	14.7157	14.8072	16.5899	16.6374	16.7506	16.7071	16.624	16.5688	16.7192	16.4374	14.8072	14	14.8779	16.4188	16.4304	16.8684	14.4575	14.2578	1.17042	0.0871216
P16671	CD36	Platelet glycoprotein 4	20.0449	19.489	20.9992	20.0991	20.9532	21.6188	19.8612	20.9891	20.5217	21.1211	19.6753	19.4583	19.9827	19.6834	19.4388	20.9178	19.5634	19.3812	0.963505	0.0746455
P48047	ATP5PO	ATP synthase subunit O, mitochondrial	19.1063	17.9281	19.706	19.0221	19.5496	19.8328	18.4573	19.9228	19.1681	19.8413	18.0478	18.6686	18.2684	17.9593	19.0887	19.3163	17.8389	17.6332	0.916848	0.0992033
Q96C90	PPP1R14B	Protein phosphatase 1 regulatory subunit 14B	13.9016	14.6219	14.1538	15.3988	14.9581	14.6622	14.7018	14.9544	14.7734	15.0813	14.4171	14.3167	13.4201	14.3351	14.1315	14.3566	13.9221	13.7109	0.779729	0.00086884
Q06055-2	ATP5MC2	Isoform 2 of ATP synthase F(0) complex subunit C2, mitochondrial	19.4189	19.7268	20.8618	19.2312	20.5645	21.3466	19.5797	20.7483	20.0303	21.2728	19.4662	19.5606	19.5861	19.5024	19.6833	19.925	19.7674	19.4675	0.743063	0.0739327
P98161	PKD1	Polycystin-1	15.4814	15.5248	17.0701	15.6355	17.3949	16.1869	16.4563	16.2539	16.0868	17.0626	15.9512	15.6997	15.9722	15.439	16.0216	16.0128	15.7201	15.338	0.70263	0.0542682
P56202	CTSW	Cathepsin W	16.2802	16.0446	15.8291	16.6726	17.322	16.7861	16.5256	16.4755	16.4913	17.0758	16.4833	16.362	15.9937	16.2655	16.4865	15.7252	15.8621	16.0029	0.700918	0.0198021
Q93084-5	ATP2A3	Isoform SERCA3E of Sarcoplasmic/endoplasmic reticulum calcium ATPase 3	20.0638	19.367	21.0391	19.8116	20.7896	20.9719	19.8007	20.9247	20.2633	20.8429	19.5489	19.8773	19.7169	19.6191	20.0096	20.2633	19.5079	19.6678	0.687882	0.0532586
P39656	DDOST	Dolichyl-diphosphooligosaccharide--protein glycosyltransferase 48 kDa subunit	19.4042	18.8414	20.4858	19.49	20.1357	20.5272	19.293	20.3129	19.797	20.3409	18.875	19.3315	19.1558	19.2129	19.6448	19.6196	19.0221	19.0664	0.67494	0.0509629
P61619	SEC61A1	Protein transport protein Sec61 subunit alpha isoform 1	17.3984	16.8329	17.8878	17.2996	18.0925	18.1724	17.1357	17.7433	17.4614	18.0501	16.9291	17.1002	17.0259	16.7901	17.4472	16.9001	17.1245	16.7595	0.663246	0.0360876
P08174-7	CD55	Isoform 7 of Complement decay-accelerating factor	18.8192	18.4337	19.545	18.8213	19.29	19.6397	18.65	19.5907	19.3973	19.8108	18.4323	18.4316	18.7384	18.8685	18.6034	18.7224	18.5975	18.7341	0.649196	0.0154453
Q9NW15	ANO10	Anoctamin-10	17.3462	16.0036	19.0284	17.5786	18.3506	18.2678	17.4227	17.7648	18.2663	18.1917	16.9268	17.4425	17.325	17.1486	18.0207	17.5051	17.0383	16.9496	0.636028	0.0702044
Q7Z5K2-3	WAPL	Isoform 3 of Wings apart-like protein homolog	16.4592	16.6286	17.554	17.2041	17.5934	17.6184	16.8758	17.6279	17.2834	17.7351	16.8445	16.2273	17.2525	16.5527	17.1018	16.8839	16.7501	16.3202	0.635762	0.0232061
Q9BVK6	TMED9	Transmembrane emp24 domain-containing protein 9	17.0672	15.6217	18.2933	17.1362	17.9439	18.0623	17.0341	17.8489	17.6045	18.2474	16.3946	17.2794	16.7839	16.8358	17.439	17.5056	16.4615	16.8496	0.634808	0.072953
P61009	SPCS3	Signal peptidase complex subunit 3	17.4479	16.9475	18.2275	17.7341	18.185	18.0185	17.4713	17.2979	18.2822	18.0925	18.6314	17.4268	17.79	17.1787	17.6679	17.1234	17.1787	16.9874	0.6116	0.0499312
O95870	ABHD16A	Protein ABHD16A	18.8599	17.8576	19.6128	18.5463	19.1562	19.4716	18.4347	19.2533	18.9257	19.417	18.0706	18.5577	18.4722	18.4911	18.6802	18.6472	18.0785	18.3697	0.604399	0.0370295
P17301	ITGA2	Integrin alpha-2	19.7601	19.1776	20.1905	19.4583	20.0151	20.4892	19.4664	20.1229	19.8974	20.5307	19.5512	19.1867	19.5885	19.5338	19.4606	19.7754	19.3432	19.0342	0.594864	0.0368458
P49755	TMED10	Transmembrane emp24 domain-containing protein 10	18.8136	18.2206	19.994	18.8831	19.7934	19.8729	18.7309	19.4033	19.2249	19.829	18.3636	18.8486	18.621	18.4441	19.0714	19.1405	18.4956	18.6099	0.575733	0.0741046
O95573	ACSL3	Long-chain-fatty-acid--CoA ligase 3	16.9106	15.9355	17.2886	16.6191	17.2653	17.2431	17.017	16.9249	16.8771	17.1163	16.2025	16.3069	16.3325	16.3603	16.693	17.0866	16.2454	15.9439	0.573271	0.0471589
O00194	RAB27B	Ras-related protein Rab-27B	20.1546	19.8365	21.0933	20.3681	21.2842	21.3271	20.0688	20.9532	20.5766	21.5302	19.8444	19.8619	20.1404	20.0112	20.2251	20.6504	20.0724	20.1404	0.569887	0.0907079
Q6QHF9	PAOX	Peroxisomal N(1)-acetyl-spermine/spermidine oxidase	16.0196	15.3952	16.7001	16.6682	16.7251	16.6086	16.9001	16.601	16.727	16.8178	15.8097	15.3358	15.6895	16.0152	16.8416	16.5164	15.5105	15.7321	0.562238	0.0882501
O43760-2	SYNGR2	Isoform 2 of Synaptogyrin-2	18.6275	17.654	18.2394	17.4543	18.1499	18.3403	17.8531	18.4255	17.9068	18.3302	17.9402	17.9117	18.1842	18.2004	17.3319	17.6791	17.6973	17.5995	0.558178	0.00712487
P61803	DAD1	Dolichyl-diphosphooligosaccharide--protein glycosyltransferase subunit DAD1	17.6589	16.2602	18.6358	17.673	18.3045	18.7575	17.5773	18.3061	18.1066	18.4953	17.3528	17.1795	17.5892	17.5685	17.8404	17.8325	17.2503	17.6918	0.556652	0.0600125
O43561-3	LAT	Isoform 3 of Linker for activation of T-cells family member 1	15.4319	15.6788	16.3928	15.3397	16.4902	16.5133	15.3798	15.8337	15.918	15.9875	15.4955	15.2508	15.2823	15.1237	15.6577	15.7165	15.2199	15.306	0.551985	0.0770427
Q96JJ3	ELMO2	Engulfment and cell motility protein 2	18.2253	17.5924	18.1719	17.9288	18.5478	18.2275	18.0151	18.1519	18.1545	17.9757	17.8521	17.7516	17.8375	17.8686	17.7965	17.4799	17.6994	17.6994	0.55054	0.00217626
Q96E17	RAB3C	Ras-related protein Rab-3C	18.5726	18.6185	19.975	19.0291	20.059	19.6346	19.175	19.2379	19.4635	19.7651	19.3101	18.8099	19.2156	18.972	19.0316	19.436	18.7276	18.6617	0.549785	0.0540537
Q14204	DYNC1H1	Cytoplasmic dynein 1 heavy chain 1	20.2637	20.3334	20.875	20.4931	21.3372	20.4398	20.9382	20.5509	20.5592	20.9532	20.6559	20.4477	20.5973	20.5877	20.4961	20.1229	20.1474	20.0998	0.548508	0.0320134
P12814	ACTN1	Alpha-actinin-1	22.1475	22.1829	23.5846	22.5551	23.4297	23.4298	22.7829	22.5042	22.5029	23.3431	22.2426	22.6056	22.5592	22.2482	22.7212	22.239	22.3664	22.2424	0.537639	0.0761355
Q9UPN3	MACF1	Microtubule-actin cross-linking factor 1, isoforms 1/2/3/5	20.3162	20.3901	21.3041	20.671	21.2809	21.1633	20.4984	21.1204	20.7845	21.2416	20.3422	20.3513	20.5139	20.2888	20.7129	20.7626	20.2899	19.9789	0.53343	0.0539165
Q8TCJ2	STT3B	Dolichyl-diphosphooligosaccharide--protein glycosyltransferase subunit STT3B	17.8211	16.996	18.4781	17.7363	18.297	18.5243	17.6095	18.2558	17.9838	18.4619	17.2987	17.4301	17.7275	17.4444	17.9278	17.9499	17.3688	17.1932	0.524149	0.0704177
P24557-3	TBXAS1	Isoform 3 of Thromboxane-A synthase	21.3813	19.6923	20.8927	20.7148	21.1513	21.2088	20.6678	21.1093	20.9634	21.145	20.215	20.5154	20.6255	20.5154	20.7203	20.9532	20.0801	20.2472	0.519926	0.0420418
Q03519	TAP2	Antigen peptide transporter 2	17.9983	17.2934	18.7176	17.7056	18.5573	18.7073	17.7188	18.3436	18.0364	18.7336	17.5324	17.6409	17.5214	17.4137	18.0873	17.9537	17.4901	17.5201	0.509854	0.0733266
P33121	ACSL1	Long-chain-fatty-acid--CoA ligase 1	19.2109	18.5217	19.488	18.8338	19.601	19.5032	18.8584	19.3405	18.8117	19.2588	18.6831	18.6232	19.1347	18.7114	18.8845	19.1381	18.2327	18.6643	0.493046	0.090146
P14770	GP9	Platelet glycoprotein IX	19.638	18.1407	19.3577	18.7195	19.0695	19.5265	18.6046	18.257	18.7769	19.1334	18.1896	18.3097	18.6778	18.5436	18.4134	18.3593	18.2176	18.4357	0.49037	0.0878679
Q9BYI3	FAM126A	Hyccin	14.4942	14.4693	15.1368	14.9363	14.9363	15.0525	14.5718	14.9214	15.3115	14.5525	14.1277	14.4166	13.8829	14.3016	14.7675	14.3475	14.5281	14.2304	0.490324	0.0234632
O95865	DDAH2	N(G),N(G)-dimethylarginine dimethylaminohydrolase 2	17.0142	17.5028	17.764	17.6118	17.858	17.8827	17.7124	17.8608	17.8074	17.9686	17.253	17.3705	17.4838	17.0672	17.6507	17.5283	17.2454	16.9132	0.489881	0.0130223
Q8TC12	RDH11	Retinol dehydrogenase 11	20.2387	18.8788	20.3156	19.5341	20.2839	20.1113	19.5474	20.2223	19.9111	20.2076	19.3178	19.5575	19.7161	19.5575	19.7841	19.9057	19.1071	19.3425	0.480389	0.0682037
Q03518	TAP1	Antigen peptide transporter 1	18.3638	17.3835	18.4057	18.1811	18.4207	18.4603	17.8309	18.0861	18.2717	18.4283	17.6629	17.9492	18.0184	18.0276	17.9899	17.8741	17.6248	17.4494	0.479369	0.025584
Q8N6T3-2	ARFGAP1	Isoform 2 of ADP-ribosylation factor GTPase-activating protein 1	17.3156	17.4456	18.077	18.2326	18.4611	18.0994	17.5579	18.2776	18.0207	18.1988	17.4926	17.52	17.2778	17.5549	17.6481	18.1539	17.4027	17.2323	0.474073	0.0956471
P53621-2	COPA	Isoform 2 of Coatomer subunit alpha	20.339	20.4268	21.179	20.5592	21.0132	21.3372	20.5703	20.9992	20.6504	21.2003	20.3537	20.6168	20.3583	20.4051	20.5592	20.4766	20.4799	20.2444	0.474041	0.0257286
Q9Y2V7	COG6	Conserved oligomeric Golgi complex subunit 6	16.9926	16.9872	17.6789	17.3576	17.7748	17.6471	17.156	17.224	17.36	17.4848	16.8665	16.7289	17.0894	16.6072	17.3265	17.0349	16.8606	16.6792	0.457057	0.0404426
P55160	NCKAP1L	Nck-associated protein 1-like	19.7485	19.7708	20.327	20.0194	20.3868	20.3409	19.884	20.4436	20.1674	20.2441	19.7888	19.884	19.7444	19.7545	20.0151	19.847	19.7694	19.5338	0.453237	0.016485
Q9NXH8	TOR4A	Torsin-4A	19.4011	18.8229	19.9016	19.361	19.9757	19.8357	19.3088	19.8492	19.6325	19.9303	18.7969	19.352	19.003	19.3156	19.4686	19.6325	19.0812	18.907	0.448044	0.0581899
Q9Y6K0	CEPT1	Choline/ethanolaminephosphotransferase 1	17.1269	15.7155	17.5566	16.9354	17.551	17.5892	16.9569	17.2818	16.9693	17.4825	16.2098	16.7253	16.7993	16.8468	16.8593	16.9662	16.7993	16.7021	0.437922	0.0301898
Q9BU02	THTPA	Thiamine-triphosphatase	16.3144	16.7002	17.3125	16.7461	17.3017	17.1379	17.0833	17.3053	16.9164	17.2818	16.3963	17.2716	16.8134	17.0348	16.8126	17.3414	16.3849	16.3099	0.436698	0.0923452
Q96AX2-3	RAB37	Isoform 3 of Ras-related protein Rab-37	19.1019	18.6895	19.3801	18.8972	19.3466	19.4466	19.2936	19.3837	18.9319	19.3577	18.6498	18.4751	18.713	18.3883	18.6391	19.3206	18.5557	18.8763	0.43255	0.0494987
Q9Y315	DERA	Deoxyribose-phosphate aldolase	18.5276	18.4864	19.2354	18.9288	19.0857	19.1226	18.815	19.0596	18.9909	19.0296	18.4782	18.2906	18.5138	18.767	18.9348	18.7992	18.378	18.229	0.429536	0.0311387
P34947	GRK5	G protein-coupled receptor kinase 5	18.2082	17.8969	18.5949	18.2879	18.7127	18.7127	18.2509	18.7822	18.4432	18.7842	18.1971	17.8221	18.4116	17.9481	18.297	18.3091	18.1919	17.8154	0.426997	0.0268051
Q8NDA8	MROH1	Maestro heat-like repeat-containing protein family member 1	16.2362	15.9626	15.9966	16.277	16.7389	16.5719	16.0897	16.6366	16.3586	16.5844	16.0159	15.999	16.0566	15.9875	16.5226	16.172	15.6317	15.916	0.418566	0.0886719
P51648-2	ALDH3A2	Isoform 2 of Fatty aldehyde dehydrogenase	17.3968	17.6193	17.8779	17.0913	17.8426	17.9253	17.8238	17.6975	17.3813	17.6897	17.822	17.4776	17.8951	17.5262	17.1249	17.7374	17.4631	16.95	0.415254	0.0632889
Q14344	GNA13	Guanine nucleotide-binding protein subunit alpha-13	19.2699	18.2966	19.1887	18.7637	18.942	19.2588	18.7279	19.1033	18.9792	19.1109	18.2051	18.4771	18.4917	18.6384	18.5232	18.8641	18.422	18.5544	0.411293	0.0160591
Q9NRA1	PDGFC	Platelet-derived growth factor C	16.1884	16.2296	16.5904	16.895	17.2491	17.0159	16.8047	17.1428	16.7396	17.2237	16.0479	16.6199	16.407	16.5427	16.1114	17.0871	16.6807	16.4382	0.411063	0.0929337
P62244	RPS15A	40S ribosomal protein S15a	16.5245	16.3075	16.5106	16.0681	17.0368	17.1625	16.4377	17.1523	16.3223	16.9312	16.334	16.7799	16.5599	16.7996	16.4963	16.3921	16.2913	16.4808	0.407193	0.0954903
Q14162	SCARF1	Scavenger receptor class F member 1	16.4507	16.5722	17.121	16.6539	16.9957	17.121	16.7118	16.8481	16.7685	17.2088	16.4657	16.1919	16.6632	16.5166	16.4399	16.5983	16.7634	16.1547	0.39998	0.0259902
Q6UWL2-2	SUSD1	Isoform 2 of Sushi domain-containing protein 1	17.9047	17.6078	18.331	17.8443	18.1629	18.3916	17.707	17.9433	18.2948	18.3577	17.2358	17.4638	17.4604	17.3239	17.7217	17.9641	17.4432	17.7041	0.391616	0.0531021
P62701	RPS4X	40S ribosomal protein S4, X isoform	18.9975	19.0865	18.9058	18.6172	19.1903	19.3969	19.2771	19.3049	18.6763	19.1151	18.9824	19.2771	18.9363	19.339	18.8598	18.3635	19.1015	18.7887	0.390732	0.0887729
P16219	ACADS	Short-chain specific acyl-CoA dehydrogenase, mitochondrial	17.952	16.7834	17.7607	17.411	17.9315	17.7699	17.0707	17.5628	17.5433	17.7512	16.8277	17.5774	17.4483	17.3237	17.4139	17.3675	16.9439	17.0228	0.388608	0.0863615
O75083	WDR1	WD repeat-containing protein 1	21.5965	21.3435	22.0129	21.5302	21.9878	21.9737	21.311	21.8906	21.708	21.8397	21.1395	21.0503	21.1395	21.1395	21.5201	21.6669	21.278	21.0883	0.385857	0.071669
Q00610	CLTC	Clathrin heavy chain 1	20.9602	20.8302	21.6067	21.0364	21.5089	21.6804	21.1087	21.6067	21.2158	21.4908	20.578	21.2037	20.6593	20.9602	21.1686	21.417	20.9681	20.6039	0.384736	0.0916293
P07858	CTSB	Cathepsin B	17.4777	17.8667	17.2088	17.6101	18.2373	18.229	17.6292	17.8352	17.6909	17.8893	17.3878	17.868	17.7033	17.3677	17.7443	17.5037	17.5257	17.3889	0.383674	0.0493461
O60826	CCDC22	Coiled-coil domain-containing protein 22	17.1207	17.3384	17.4946	17.3437	17.4727	17.4012	17.5668	17.546	17.3568	17.5531	17.2282	17.3682	17.2015	17.0894	17.2263	17.1922	17.2043	16.7247	0.381828	0.0131115
Q9BX67	JAM3	Junctional adhesion molecule C	17.5839	16.921	17.9056	17.2143	18.0222	17.5984	17.2955	17.7177	17.42	17.8184	16.9794	17.1935	17.2126	16.9033	17.2325	17.5914	17.1022	17.0335	0.370824	0.0778325
P67812-3	SEC11A	Isoform 3 of Signal peptidase complex catalytic subunit SEC11A	19.9672	19.2375	20.0969	19.8775	19.8793	19.797	19.4379	19.7515	19.7985	19.8277	19.0076	19.2161	19.3669	19.1002	19.8793	19.1318	19.2506	19.1885	0.370313	0.0730708
O75396	SEC22B	Vesicle-trafficking protein SEC22b	18.9594	18.0675	19.0049	18.6985	18.6724	19.0475	18.6205	19.2207	18.7964	19.0168	18.3929	18.725	18.5014	18.4365	18.7255	18.7007	18.3358	18.2476	0.369094	0.0649466
Q9Y6W5	WASF2	Wiskott-Aldrich syndrome protein family member 2	19.7198	19.8327	20.1419	19.69	20.0891	20.0643	19.6693	20.3038	19.9732	20.2003	19.572	19.4836	19.5871	19.63	19.7553	19.4082	19.7373	19.7056	0.368355	0.0312923
P25686	DNAJB2	DnaJ homolog subfamily B member 2	17.0219	17.0242	17.2564	17.0404	17.4052	17.3253	16.976	17.109	17.1543	17.2059	16.7395	16.8135	16.5169	16.6297	16.7548	17.0351	16.6905	16.823	0.368133	0.0118785
P33908	MAN1A1	Mannosyl-oligosaccharide 1,2-alpha-mannosidase IA	18.2928	18.5799	19.0397	19.0712	19.1592	19.0194	18.6717	18.8277	18.9511	18.9185	18.5489	18.4731	18.5726	18.5819	18.3015	18.6944	18.6625	18.5819	0.36575	0.0204442
P27449	ATP6V0C	V-type proton ATPase 16 kDa proteolipid subunit	17.23	17.1533	17.5273	17.4799	17.338	17.2273	17.1106	16.936	17.7811	17.0486	16.9677	16.9731	17.1371	16.7289	17.0717	16.6599	17.0088	16.9557	0.35455	0.0895257
Q9BXT8	RNF17	RING finger protein 17	17.8871	17.3806	18.5187	18.3753	18.5878	18.3192	17.8614	18.4084	18.1905	18.4255	17.9662	17.8499	17.7749	18.0354	17.9909	18.0907	17.7864	17.8248	0.350257	0.0539723
P51809	VAMP7	Vesicle-associated membrane protein 7	19.2705	18.9381	19.6992	18.9638	19.3423	19.6631	19.3778	19.7279	19.421	19.5032	18.9664	19.1496	19.2032	19.1332	18.9184	19.421	19.0921	19.1995	0.348662	0.0300761
Q13201	MMRN1	Multimerin-1	20.8722	20.7783	21.3174	21.021	21.6296	21.5571	21.0008	21.2254	21.2003	21.7802	20.7659	21.0504	20.7493	20.9945	21.0391	21.0715	20.9329	20.863	0.346018	0.0427343
Q14643	ITPR1	Inositol 1,4,5-trisphosphate receptor type 1	19.4376	18.6024	19.5159	19.1143	19.3025	19.3108	19.312	19.5755	19.162	19.5293	18.5871	19.0934	18.9337	18.8463	19.1819	19.0517	18.9915	18.7309	0.343555	0.0186461
P16615	ATP2A2	Sarcoplasmic/endoplasmic reticulum calcium ATPase 2	21.4518	20.0613	21.1298	20.9247	20.9247	21.145	20.7219	20.9634	20.8541	20.931	20.4264	21.043	20.8299	20.8378	20.7421	20.5037	20.3123	20.7614	0.341968	0.0266983
Q15771	RAB30	Ras-related protein Rab-30	17.8716	17.1318	17.9375	17.8845	17.8059	18.3135	17.5374	17.8464	17.6991	17.7089	17.0647	17.5105	17.4339	17.5229	17.3337	17.7621	17.3708	17.5381	0.339276	0.0866429
P54709	ATP1B3	Sodium/potassium-transporting ATPase subunit beta-3	17.7908	17.0657	17.8893	17.4227	17.8885	17.9641	17.357	17.8796	17.4921	17.8336	17.2183	17.3917	17.2255	17.2083	17.4463	17.4825	17.2689	17.3119	0.33885	0.0526036
Q17RC7	EXOC3L4	Exocyst complex component 3-like protein 4	18.0332	17.5672	18.0627	17.8184	18.0036	18.0353	17.9129	18.0111	17.7135	18.0353	15.2926	17.3659	16.8323	17.4576	17.6909	17.8464	17.1804	17.6747	0.337213	0.0511842
Q5VW32	BROX	BRO1 domain-containing protein BROX	18.3144	18.31	19.0846	18.5726	19.1109	19.1247	18.5759	18.9545	18.6512	18.8758	18.3325	18.5476	18.5021	18.3172	18.5607	18.7085	18.4257	18.4922	0.336657	0.0478382
Q5VIR6-4	VPS53	Isoform 4 of Vacuolar protein sorting-associated protein 53 homolog	17.5492	17.6079	17.5807	17.7602	17.5628	17.4986	17.4354	17.7071	17.5717	17.551	17.0933	17.5982	16.8898	17.4151	17.484	17.3585	17.1682	16.8682	0.335393	0.0347583
P17252	PRKCA	Protein kinase C alpha type	19.2124	19.2608	19.6052	19.2878	19.7613	19.539	19.2351	19.6973	19.4292	19.6662	19.0917	19.2987	19.1162	19.2909	19.3705	19.0596	19.1675	19.1929	0.334764	0.0280224
Q15233	NONO	Non-POU domain-containing octamer-binding protein	17.4497	17.0693	17.2379	16.8722	17.4756	17.4264	17.1391	17.7116	16.9655	17.0452	16.8324	17.7114	16.6986	17.7204	17.1369	17.0717	16.9319	16.8957	0.334567	0.0706095
Q9BZV1	UBXN6	UBX domain-containing protein 6	18.0708	18.1492	18.7695	18.3317	18.8489	18.64	18.1868	18.6274	18.3959	18.7007	18.0652	18.0487	17.9552	17.9885	18.2373	18.4328	18.0628	18.0897	0.334122	0.0597817
O75843	AP1G2	AP-1 complex subunit gamma-like 2	16.5958	16.5609	16.6082	16.4944	16.8112	16.7058	16.4585	16.256	16.6177	16.5955	16.5055	16.6189	16.3946	16.5599	16.4225	15.8579	16.4409	16.2349	0.330815	0.0808862
Q8WUD1	RAB2B	Ras-related protein Rab-2B	18.7806	18.4115	18.7879	18.7233	18.7969	18.9845	18.4166	18.7696	18.7174	18.8587	18.2594	18.1394	18.4709	18.3617	18.21	18.8238	18.2264	18.3663	0.330371	0.0830386
A5PLN9-5	TRAPPC13	Isoform 4 of Trafficking protein particle complex subunit 13	18.2917	18.3609	18.6985	18.1719	18.8893	18.6953	18.2647	18.7417	18.7085	18.8056	18.339	18.3609	18.179	18.1653	18.6117	18.0339	18.3915	18.281	0.330359	0.0760737
Q96C24	SYTL4	Synaptotagmin-like protein 4	20.1007	19.5462	20.2355	19.8146	20.1938	20.3099	19.8152	20.3194	19.9501	20.2149	19.6831	19.5237	19.5812	19.3908	19.7072	20.1745	19.6454	19.6262	0.32935	0.0807
Q12907	LMAN2	Vesicular integral-membrane protein VIP36	19.0647	18.2305	19.1455	18.6274	18.9202	19.207	18.5908	19.0001	18.8508	19.1122	18.5056	18.5056	18.7285	18.6786	18.6163	18.9229	18.3809	18.4269	0.327017	0.0757998
A2RUS2	DENND3	DENN domain-containing protein 3	19.0663	19.2363	19.8512	19.5265	20.0566	19.6557	19.2779	19.5476	19.4413	19.7793	19.1966	19.1859	19.1361	19.2844	19.4466	19.2878	19.2471	19.0954	0.326567	0.0828686
Q92930	RAB8B	Ras-related protein Rab-8B	19.1943	19.1943	19.673	19.2711	19.6412	19.7274	19.1692	19.5672	19.5353	20.2141	19.0957	18.9867	19.2126	19.1375	19.1691	19.3156	19.175	19.1474	0.326257	0.0238825
Q14165	MLEC	Malectin	19.2223	18.4555	19.6225	18.8758	19.038	19.6037	19.1406	19.4516	19.0982	19.2665	18.2961	18.8304	18.8706	18.8456	18.9744	19.1132	18.7493	18.9421	0.321688	0.0572913
P07384	CAPN1	Calpain-1 catalytic subunit	21.0196	21.3332	21.8147	21.179	21.9397	21.793	21.3519	21.7802	21.5089	21.7611	20.9885	21.3134	21.1053	21.2234	21.3871	21.597	21.2088	21.2234	0.320667	0.0621186
O43264	ZW10	Centromere/kinetochore protein zw10 homolog	15.5019	15.9951	16.3351	15.7164	16.5072	16.4579	16.0681	16.3373	15.9983	16.3952	16.3122	16.0284	15.706	15.8766	16.0638	15.8119	16.0714	15.8711	0.319242	0.0439149
Q9HD45	TM9SF3	Transmembrane 9 superfamily member 3	18.3553	18.1789	18.8479	18.4225	18.5871	18.8213	18.3204	18.6391	18.4393	18.7442	18.0026	18.2088	18.2816	18.1024	18.2865	18.3348	18.2416	18.1112	0.317891	0.020014
Q05655	PRKCD	Protein kinase C delta type	20.2272	20.2734	20.7896	20.3156	20.7833	20.7665	20.2734	20.2923	20.5354	20.7483	19.9734	20.289	20.151	20.1847	20.4612	20.1149	20.2242	20.0501	0.31755	0.0689424
Q14642	INPP5A	Type I inositol 1,4,5-trisphosphate 5-phosphatase	18.7924	18.1694	18.3487	18.2339	18.2993	18.3506	18.5582	18.4142	18.16	18.9329	17.9121	18.5055	18.2375	18.3231	17.7945	18.0485	17.8531	18.4652	0.316135	0.0769588
Q9BQA9	CYBC1	Cytochrome b-245 chaperone 1	18.1084	17.8485	18.5835	18.0172	18.4586	18.4676	17.9098	18.3753	18.2055	18.2678	17.9701	17.7515	18.198	18.0222	18.166	17.9455	17.9955	17.7919	0.308621	0.0583277
A1A4S6	ARHGAP10	Rho GTPase-activating protein 10	19.3219	19.1381	19.4916	19.4847	19.5224	19.5138	19.4619	19.2665	19.4262	19.4353	19.1597	19.3661	19.235	19.3739	19.3185	18.9035	19.5213	18.776	0.308314	0.0987362
Q9UL26	RAB22A	Ras-related protein Rab-22A	18.7257	19.1927	19.5907	19.0197	19.3206	19.6723	19.4408	19.3383	19.2466	19.476	19.1279	18.6951	18.9699	18.8683	18.9649	19.3339	18.9956	19.1045	0.303989	0.0294523
P42345	MTOR	Serine/threonine-protein kinase mTOR	17.6578	17.9459	17.7677	17.8215	17.9838	17.7667	17.8046	18.0012	17.938	17.9499	17.7034	17.7124	17.591	17.6529	17.7356	17.5609	17.7124	17.371	0.30385	0.0127964
Q01813	PFKP	ATP-dependent 6-phosphofructokinase, platelet type	20.4602	20.8321	21.2937	20.5602	20.8541	21.0869	20.4741	20.8485	20.7041	20.4304	20.6477	20.4979	20.2991	20.6303	20.5217	20.3583	20.735	20.3582	0.300206	0.0668862
Q8IZH2	XRN1	5'-3' exoribonuclease 1	17.4177	17.3496	17.9563	17.7671	18.0066	17.92	17.5684	17.9669	17.7788	17.9174	17.4309	17.3599	17.6639	17.4561	17.6251	17.771	17.4985	17.3065	0.297861	0.0489502
Q15165	PON2	Serum paraoxonase/arylesterase 2	16.5714	16.2846	17.0764	16.9372	17.0198	17.0953	16.5743	16.8409	16.9124	16.9036	16.4484	16.3865	16.5056	16.5105	16.899	16.6619	16.4427	16.3593	0.297841	0.0827304
Q99623	PHB2	Prohibitin-2	19.5567	19.1715	19.9149	18.8409	19.3556	19.6237	19.4326	19.0197	19.0517	19.6723	18.8018	19.1873	19.2365	18.9514	18.8746	19.2517	18.899	18.9733	0.297014	0.0902392
Q12768	WASHC5	WASH complex subunit 5	17.0274	17.2978	17.6871	17.3053	17.7722	17.5388	17.2978	17.4442	17.3652	17.5658	17.0264	17.2239	17.1486	17.1528	17.2587	17.3993	17.2175	16.9104	0.287183	0.0631875
Q13576	IQGAP2	Ras GTPase-activating-like protein IQGAP2	21.1048	21.2749	21.6804	21.2842	21.8272	21.6296	21.1851	21.7277	21.3979	21.793	21.1656	21.5021	20.992	21.5206	21.3372	21.3271	21.3	21.1048	0.286238	0.0809788
Q7L576	CYFIP1	Cytoplasmic FMR1-interacting protein 1	20.9677	21.1958	21.5482	21.2937	21.58	21.409	21.4879	21.5367	21.3065	21.4644	21.1595	21.344	21.1505	21.3237	21.2728	21.2158	21.2566	20.9677	0.285787	0.0109847
Q9Y6C2	EMILIN1	EMILIN-1	19.1587	18.7208	18.9377	19.0111	19.22	19.3051	18.9933	19.2789	19.0857	19.4413	18.765	18.8487	18.9719	18.8613	18.9013	18.9587	18.8581	18.8525	0.28395	0.00511729
Q9Y6K9-2	IKBKG	Isoform 2 of NF-kappa-B essential modulator	17.0711	17.245	17.2825	16.9332	17.6354	17.3319	17.0711	17.4832	17.2379	17.4756	17.1147	16.7409	16.9693	17.0434	17.191	16.9693	17.024	17.0882	0.283787	0.0473119
P11216	PYGB	Glycogen phosphorylase, brain form	20.0126	19.9881	20.2769	20.0253	20.4677	20.4474	20.1956	20.6283	20.1938	20.3309	19.9422	20.0699	20.0288	19.9608	20.0458	20.4187	19.9306	20.0221	0.282269	0.0741052
Q8IWA5	SLC44A2	Choline transporter-like protein 2	18.242	17.5199	18.4393	18.0111	18.379	18.4882	18.1343	18.5444	18.1701	18.4993	17.4791	17.3504	17.9393	17.8125	18.0954	18.318	17.9849	17.8466	0.281984	0.0636848
O00743-3	PPP6C	Isoform 3 of Serine/threonine-protein phosphatase 6 catalytic subunit	17.508	17.5037	18.1479	17.6405	18.0757	18.1345	17.6279	18.0757	17.7198	18.0795	17.4741	17.7409	17.3886	17.5782	17.6128	17.8958	17.5037	17.577	0.279422	0.0875363
Q8IWB7	WDFY1	WD repeat and FYVE domain-containing protein 1	19.0082	18.9188	19.3193	19.1399	19.4082	19.2383	19.1516	19.1455	19.1691	19.3405	19.1126	18.8727	19.1209	18.8258	19.0776	18.8798	18.9188	18.9036	0.277582	0.00481715
Q9Y6B7	AP4B1	AP-4 complex subunit beta-1	16.2495	15.9297	15.9845	16.05	16.2107	15.9866	15.8667	15.9194	16.0655	16.1351	15.8282	15.8333	15.4704	15.7157	15.9059	15.3186	15.9761	15.7285	0.277506	0.0998359
P00338-3	LDHA	Isoform 3 of L-lactate dehydrogenase A chain	20.7496	20.9944	21.3372	21.2728	20.9891	21.3174	21.087	21.2344	21.2344	21.2621	20.8514	21.1354	20.6597	21.1209	20.8171	20.8927	21.0629	20.8295	0.271903	0.0138078
Q9H270	VPS11	Vacuolar protein sorting-associated protein 11 homolog	17.47	17.6897	17.4986	17.661	17.7166	17.6986	17.7122	17.8601	17.7156	17.6271	17.5838	17.6365	17.4453	17.6773	17.6374	17.2288	17.7196	17.303	0.268394	0.0474052
P01033	TIMP1	Metalloproteinase inhibitor 1	18.5904	18.9136	18.7637	18.9109	19.4822	19.243	18.9184	18.9617	19.2517	19.5404	18.8464	18.5697	18.8911	18.8599	18.9267	18.9985	18.8992	18.7897	0.267897	0.0673421
Q9ULQ0	STRIP2	Striatin-interacting protein 2	17.2976	17.3349	18.0515	17.7512	18.0116	18.0973	17.8158	17.8021	17.9103	17.9491	17.3919	17.4303	17.3086	17.4544	17.8205	17.7607	17.6244	17.4333	0.267718	0.030646
P60891	PRPS1	Ribose-phosphate pyrophosphokinase 1	19.0925	19.0536	19.3255	19.2136	19.3034	19.4383	19.2156	19.3678	19.2653	19.4198	18.6657	19.1052	18.9493	19.0326	19.0804	19.0761	18.8147	19.2353	0.266436	0.0195943
Q9BXS5-2	AP1M1	Isoform 2 of AP-1 complex subunit mu-1	19.5086	19.6734	20.0355	19.797	19.9799	20.2076	19.7434	20.0326	19.7772	19.925	19.6326	19.8417	19.4852	19.6159	19.826	19.7358	19.6962	19.4721	0.265631	0.0581578
Q8IY22	CMIP	C-Maf-inducing protein	18.4145	18.6201	19.0596	18.7603	19.2164	19.1782	18.837	19.1744	18.9765	19.0963	18.7257	18.7924	18.7183	18.5533	18.9123	18.8831	18.7908	18.6594	0.265116	0.0289426
Q15052	ARHGEF6	Rho guanine nucleotide exchange factor 6	18.6702	19.0986	18.9521	18.731	18.7888	18.9744	18.7252	19.2918	18.8519	18.6741	18.7856	19.0833	18.831	18.8907	18.8028	18.4465	18.7951	18.6258	0.258892	0.0978271
Q13555-6	CAMK2G	Isoform 6 of Calcium/calmodulin-dependent protein kinase type II subunit gamma	16.8498	17.1597	17.6633	17.2834	17.5238	17.3934	17.3655	17.2641	17.4284	17.5755	16.8723	17.2661	17.0111	16.7958	17.3585	16.9029	17.3164	16.971	0.257877	0.0568024
Q9H267	VPS33B	Vacuolar protein sorting-associated protein 33B	18.1138	18.1438	18.2853	18.2907	18.5012	18.2577	18.285	18.4192	18.2614	18.2543	18.0616	18.3281	18.1938	18.2115	18.3317	17.8361	18.2176	17.9746	0.254904	0.0596666
Q99805	TM9SF2	Transmembrane 9 superfamily member 2	18.0167	18.1431	18.5408	18.0848	18.3907	18.7664	18.1133	18.4579	18.2147	18.3861	17.8003	17.9593	17.894	17.8275	18.0665	18.2185	18.0803	18.1828	0.251583	0.098062
O95372	LYPLA2	Acyl-protein thioesterase 2	18.2	18.2376	18.3289	18.3211	18.5254	18.3317	18.1719	18.3497	18.3806	18.4078	18.0943	18.1702	18.143	18.1122	18.214	18.0936	18.1558	17.9426	0.250393	0.0185121
P49767	VEGFC	Vascular endothelial growth factor C	17.0123	17.1264	16.8296	17.1193	17.6163	17.1737	16.9067	17.2523	17.1712	17.2731	16.804	17.0817	17.0099	16.9872	16.9954	16.9661	16.995	16.9403	0.249855	0.096002
Q92974	ARHGEF2	Rho guanine nucleotide exchange factor 2	18.1511	18.3376	18.3016	18.1455	18.4057	18.3358	18.0009	18.6069	18.2761	18.3358	18.1796	18.0066	18.0835	18.0003	18.1308	18.1232	18.0217	18.0255	0.249793	0.0656504
Q99460	PSMD1	26S proteasome non-ATPase regulatory subunit 1	19.2394	19.0746	19.3216	19.2069	19.2784	19.3371	19.1516	19.3033	19.2211	19.308	19.0651	18.9341	19.0536	18.8374	19.1307	19.1264	18.9918	18.8099	0.243576	0.014942
Q9Y4P8	WIPI2	WD repeat domain phosphoinositide-interacting protein 2	17.9028	18.0898	18.3367	18.2013	18.5621	18.2625	18.253	18.3479	18.2853	18.3223	17.9915	18.1264	17.9712	17.9321	18.2746	18.3324	17.9556	17.841	0.241251	0.0923021
P04406	GAPDH	Glyceraldehyde-3-phosphate dehydrogenase	21.4212	21.3635	22.0508	21.58	21.8649	21.9878	21.4656	21.8397	21.7611	21.8906	21.2282	21.6465	20.9468	21.496	21.58	21.7611	21.4212	21.4212	0.237904	0.0922349
P48059-3	LIMS1	Isoform 3 of LIM and senescent cell antigen-like-containing domain protein 1	20.5723	20.7907	21.058	20.931	21.1093	20.9586	20.7375	20.7749	20.8927	20.9719	20.5679	20.7159	20.6124	20.6472	20.6621	20.5735	20.7776	20.6161	0.237275	0.0268733
P49327	FASN	Fatty acid synthase	19.9805	20.2015	20.5307	20.2594	20.5037	20.4544	20.1759	20.6235	20.2149	20.4961	20.0768	20.1412	20.0273	20.1548	20.3238	20.1528	20.1476	20.0084	0.236334	0.0744327
Q8TC07-2	TBC1D15	Isoform 2 of TBC1 domain family member 15	18.4375	18.7112	19.0423	18.5694	18.9765	18.9861	18.7347	19.2101	18.7208	18.9341	18.6106	18.7049	18.5818	18.7735	18.6061	18.8882	18.718	18.5514	0.234717	0.0959869
Q5T4S7-2	UBR4	Isoform 2 of E3 ubiquitin-protein ligase UBR4	19.1513	19.2201	19.6833	19.3423	19.7713	19.69	19.297	19.7463	19.4822	19.7125	19.4915	19.442	19.338	19.3698	19.4413	19.4388	19.297	19.275	0.234357	0.070776
O14773	TPP1	Tripeptidyl-peptidase 1	18.4461	18.5213	18.7068	18.4512	18.7046	18.6972	18.4494	18.6854	18.6095	18.6764	18.2881	18.7686	18.3294	18.2752	18.5513	18.4579	18.4778	18.0934	0.234136	0.0615148
Q6P589	TNFAIP8L2	Tumor necrosis factor alpha-induced protein 8-like protein 2	17.0841	17.4676	17.3063	17.2951	17.8203	17.4255	17.5342	17.633	17.5758	17.633	17.5274	17.3583	17.6906	17.3551	17.4186	17.3925	17.2988	17.347	0.233517	0.0195066
P55884-2	EIF3B	Isoform 2 of Eukaryotic translation initiation factor 3 subunit B	19.2429	19.3413	19.4262	19.476	19.6992	19.5835	19.36	19.797	19.5985	19.7416	19.2506	19.272	19.2399	19.1641	19.425	19.5684	19.2749	19.2293	0.233244	0.06524
P09496-2	CLTA	Isoform Non-brain of Clathrin light chain A	18.8709	18.9021	19.062	19.1977	19.2629	19.22	18.9554	19.22	19.3051	19.2572	18.756	18.9591	18.8414	18.864	19.0366	18.8072	18.9686	19.0255	0.233199	0.0270381
Q14232	EIF2B1	Translation initiation factor eIF-2B subunit alpha	18.3241	18.6185	19.0604	18.9861	19.1122	19.1405	18.7243	18.6764	18.9587	18.9705	18.703	18.6248	18.4635	18.645	18.7869	18.6741	18.5525	18.7449	0.232817	0.0888657
P15529-2	CD46	Isoform B of Membrane cofactor protein	18.7709	18.1256	18.5444	18.4781	18.4619	18.5463	18.275	18.6791	18.4848	18.5091	18.292	17.9609	18.6727	18.2484	18.2164	18.4965	18.0762	18.2484	0.23002	0.0684143
O15111	CHUK	Inhibitor of nuclear factor kappa-B kinase subunit alpha	16.8616	17.0685	17.4472	16.9584	17.4597	17.3538	17.0629	17.315	17.1823	17.3538	16.8926	17.0531	17.0131	17.0251	17.1441	17.1264	17.0516	16.8606	0.229069	0.0500134
Q9H6V9-2	LDAH	Isoform 2 of Lipid droplet-associated hydrolase	17.0083	16.923	17.2545	16.4859	17.1511	17.2325	16.867	16.9632	16.9323	17.2729	16.6171	17.101	16.5643	16.931	16.9816	16.8374	16.841	16.541	0.228953	0.0828613
Q6PGP7	TTC37	Tetratricopeptide repeat protein 37	17.7508	17.7117	17.9186	17.7413	18.0327	17.8361	17.7099	17.9051	17.801	17.8663	17.8067	17.5546	17.5879	17.6088	17.6828	17.5786	17.753	17.5113	0.225565	0.0224501
O43813	LANCL1	Glutathione S-transferase LANCL1	19.8875	19.572	19.762	19.8527	19.9119	19.8196	19.7974	19.8421	19.8756	19.7595	19.7699	19.5175	19.8434	19.6426	19.6969	19.7108	19.5635	19.5279	0.22455	0.00196016
Q13045	FLII	Protein flightless-1 homolog	19.0521	19.1617	19.5785	19.2839	19.6645	19.5723	19.2397	19.2334	19.2918	19.6397	18.9271	19.2799	18.9911	19.1424	19.2249	19.2342	19.1774	19.0731	0.222928	0.0777256
O00186	STXBP3	Syntaxin-binding protein 3	18.8232	18.3055	18.3783	18.4488	18.1866	18.3947	18.4493	18.3764	18.257	18.2663	17.9681	18.488	18.2071	18.4197	18.1743	18.1274	17.9835	18.1582	0.221933	0.0126439
P17812	CTPS1	CTP synthase 1	18.0406	18.1432	18.4346	18.1988	18.4554	18.4422	18.1269	18.5467	18.3454	18.5607	18.0958	18.0545	18.1314	18.1126	18.2519	18.2485	18.0885	18.0743	0.217497	0.0497133
P49257	LMAN1	Protein ERGIC-53	17.3443	16.9997	17.6565	17.2674	17.4129	17.6394	17.4979	17.6202	17.3159	17.5652	17.1081	17.3402	17.3875	17.293	17.3427	17.3308	17.2334	17.2304	0.212923	0.0244419
Q14247	CTTN	Src substrate cortactin	20.061	20.2543	20.3001	20.327	20.4398	20.3637	20.3049	20.6992	20.4931	20.5466	20.1398	20.1745	19.9891	19.9984	20.0817	20.3001	20.2582	20.3666	0.208497	0.0613733
P53618	COPB1	Coatomer subunit beta	19.5401	19.7039	20.0514	19.7641	20.1009	20.0253	19.765	19.9303	19.8555	19.9822	19.6803	19.7105	19.631	19.6138	19.6954	19.8694	19.7105	19.6649	0.200355	0.0381203
Q12765-2	SCRN1	Isoform 2 of Secernin-1	17.8913	18.2629	18.3258	18.1762	18.5033	18.3639	18.1138	18.2755	18.3068	18.3333	18.1517	18.0767	18.0026	18.0583	17.9772	18.3123	18.089	18.0732	0.199707	0.0735169
O60313-10	OPA1	Isoform 4 of Dynamin-like 120 kDa protein, mitochondrial	18.706	18.7193	18.9408	18.7224	19.0181	19.0744	18.7713	18.7035	18.7397	19.0111	18.4041	18.8427	18.6083	18.7076	18.7529	18.5672	18.7732	18.554	0.199565	0.0890149
Q96CW1	AP2M1	AP-2 complex subunit mu	19.1031	18.9236	19.0586	19.0001	19.0507	19.1359	18.9846	19.0939	19.0867	19.0909	18.8008	19.0448	18.8739	19.0081	18.9927	18.7822	19.0081	18.7003	0.199546	0.0295893
P19634	SLC9A1	Sodium/hydrogen exchanger 1	17.32	16.5577	16.9517	16.9403	16.7901	16.9309	16.8055	17.1551	16.8826	16.9752	16.9609	16.5141	16.8994	16.9595	16.6119	16.8436	16.6296	16.7687	0.199394	0.0605485
Q9UBN7	HDAC6	Histone deacetylase 6	17.3432	17.3812	17.6679	17.3859	17.7143	17.5695	17.4714	17.7406	17.4429	17.6394	17.3197	17.2137	17.4459	17.1294	17.4662	17.5094	17.3443	17.258	0.193268	0.0583019
P42229	STAT5A	Signal transducer and activator of transcription 5A	19.9492	19.9179	20.1833	19.9577	20.1499	20.2049	20.1553	20.106	20.1643	20.1467	19.7939	20.0497	19.6888	19.8728	20.0543	20.2196	19.9004	19.7063	0.185899	0.099084
Q9BT78	COPS4	COP9 signalosome complex subunit 4	19.4254	19.5166	19.7826	19.3173	19.6611	19.7339	19.4938	19.706	19.5032	19.6128	19.4731	19.5417	19.2907	19.4223	19.3854	19.2789	19.508	19.564	0.185531	0.0542638
Q9H9C1	VIPAS39	Spermatogenesis-defective protein 39 homolog	16.6616	16.5775	16.6442	16.5636	16.5646	16.6816	16.5846	16.6297	16.6209	16.7143	16.4858	16.5631	16.3917	16.5457	16.481	16.3958	16.5178	16.3323	0.184559	0.00373527
Q9BZH6	WDR11	WD repeat-containing protein 11	18.9282	19.0547	18.7869	18.7544	18.9834	18.7457	18.9671	18.8574	18.7653	18.8378	18.8178	18.9736	19.0003	18.915	18.7564	18.4432	18.8206	18.6968	0.184546	0.0838843
O00231-2	PSMD11	Isoform 2 of 26S proteasome non-ATPase regulatory subunit 11	19.0589	19.2584	19.3914	19.2273	19.4101	19.3517	19.2767	19.2466	19.2288	19.3687	19.1698	19.2385	19.1586	19.179	19.1636	18.9553	19.2164	19.1487	0.181781	0.0239654
Q96AX1	VPS33A	Vacuolar protein sorting-associated protein 33A	16.6197	16.7654	16.9424	17.1615	16.9904	16.9262	17.0988	16.9912	16.8344	16.9112	16.7855	17.0577	16.9948	17.0042	16.9467	16.7692	16.6113	16.8361	0.177401	0.0592896
Q96QK1	VPS35	Vacuolar protein sorting-associated protein 35	19.1517	19.3422	19.5935	19.3264	19.5723	19.6268	19.4297	19.5543	19.4101	19.5543	19.2378	19.4788	19.2105	19.3037	19.4555	19.3405	19.3742	19.2	0.176096	0.0338318
Q8N9N7	LRRC57	Leucine-rich repeat-containing protein 57	18.5831	18.6855	18.6942	18.5683	18.7954	18.7397	18.7285	18.7336	18.6686	18.7832	18.7023	18.6463	18.6423	18.5029	18.6243	18.5317	18.6517	18.4267	0.174569	0.0103113
Q92900	UPF1	Regulator of nonsense transcripts 1	18.3671	18.4499	18.4993	18.5073	18.6106	18.482	18.5825	18.5158	18.6741	18.5513	18.6252	18.3414	18.4291	18.4363	18.4579	18.4078	18.4141	18.3402	0.167985	0.00669636
O15427	SLC16A3	Monocarboxylate transporter 4	17.3181	16.6921	17.5433	16.9881	17.1543	17.3125	17.1354	17.2443	17.0844	17.335	16.9471	17.2473	16.6045	17.1495	17.1116	16.9064	16.9191	17.137	0.167645	0.0503081
P54136	RARS	Arginine--tRNA ligase, cytoplasmic	18.5293	18.7037	18.8612	18.6897	18.9257	18.847	18.6145	18.7832	18.7417	18.8959	18.6023	18.7357	18.5339	18.5645	18.7554	18.5726	18.6294	18.5232	0.162302	0.0636281
Q8N5K1	CISD2	CDGSH iron-sulfur domain-containing protein 2	18.8436	18.3753	18.613	18.7366	18.3248	18.5083	18.6406	18.4236	18.3883	18.4479	18.3349	17.9352	18.8492	18.5344	18.385	18.3479	18.3523	18.0975	0.161446	0.0998861
Q96MW5	COG8	Conserved oligomeric Golgi complex subunit 8	16.5488	16.5745	16.7114	16.6076	16.8118	16.6989	16.5071	16.7415	16.6957	16.8758	16.4566	16.4054	16.5442	16.2448	16.6191	16.6391	16.4698	16.3972	0.159689	0.0766973
P50570	DNM2	Dynamin-2	20.1399	20.2093	20.5814	20.2923	20.4187	20.4436	20.3042	20.5602	20.3868	20.3818	20.1514	20.2855	20.1439	20.1851	20.2769	20.4474	20.2599	20.0912	0.153867	0.0941471
P32019	INPP5B	Type II inositol 1,4,5-trisphosphate 5-phosphatase	18.0746	18.3399	18.3868	18.318	18.3868	18.4084	18.256	18.3806	18.3999	18.3426	18.4458	18.2081	18.2296	18.1749	18.2275	18.2282	18.2047	18.1901	0.15374	0.002242
Q9UNM6-2	PSMD13	Isoform 2 of 26S proteasome non-ATPase regulatory subunit 13	19.2441	19.1661	19.299	19.1282	19.3998	19.3447	19.0813	19.299	19.2334	19.2694	19.0313	19.0539	19.0948	19.2662	19.1226	19.0789	19.2406	19.0299	0.15361	0.075695
P51114	FXR1	Fragile X mental retardation syndrome-related protein 1	18.5711	18.8351	18.731	18.7068	18.924	18.8262	18.7388	18.7094	18.7429	18.8857	18.806	18.7072	18.8731	18.7907	18.4993	18.5566	18.7669	18.7215	0.15216	0.0715294
Q9NY65	TUBA8	Tubulin alpha-8 chain	20.6628	20.5438	21.2426	20.683	21.1298	21.0665	20.7909	20.8992	20.9468	21.2158	20.721	20.9017	20.6801	20.6543	20.8485	20.7483	20.9085	20.7559	0.151355	0.0872118
O14617-5	AP3D1	Isoform 5 of AP-3 complex subunit delta-1	18.7616	18.8893	19.0001	19.053	19.1833	19.1122	18.9768	18.9408	19.0094	18.9567	18.7522	18.9921	18.7988	18.9346	18.8831	18.9812	18.9436	18.7765	0.148387	0.0544536
P54619-3	PRKAG1	Isoform 3 of 5'-AMP-activated protein kinase subunit gamma-1	18.5529	18.7119	18.9021	18.9276	19.0094	19.0111	18.8977	19.1088	18.9496	19.0435	18.7204	18.9643	18.6052	18.86	18.7746	19.0454	18.7952	18.7731	0.148261	0.0741067
Q9NXC2	GFOD1	Glucose-fructose oxidoreductase domain-containing protein 1	16.7734	16.5877	17.2273	16.9899	16.9548	17.0605	17.0176	16.9993	16.9524	16.8795	16.6352	16.7035	16.9248	16.9105	17.0486	16.7979	16.8176	16.7333	0.147556	0.0565045
O43182	ARHGAP6	Rho GTPase-activating protein 6	18.9715	19.356	19.3925	19.2366	19.4669	19.3726	19.2753	19.3082	19.3485	19.4847	19.1064	19.328	19.1285	19.1842	19.2087	19.1186	19.2804	19.2417	0.141973	0.0210179
Q92538	GBF1	Golgi-specific brefeldin A-resistance guanine nucleotide exchange factor 1	17.5072	17.7484	17.8154	17.6737	17.8514	17.7476	17.6555	17.8036	17.682	17.8135	17.5858	17.6863	17.4717	17.5341	17.6227	17.5975	17.6898	17.5372	0.136245	0.0292213
O43312-5	MTSS1	Isoform 4 of Protein MTSS 1	18.8525	19.0546	19.1485	18.9881	19.2533	18.9901	18.9782	19.0307	19.0768	19.1088	19.0777	18.8195	18.9185	18.8397	19.0237	18.9059	18.8851	18.9038	0.136189	0.0678422
Q9Y3D6	FIS1	Mitochondrial fission 1 protein	18.0669	18.0847	18.3223	17.7835	18.075	18.2164	18.0456	18.0429	18.0294	18.0819	17.8947	17.9494	18.0515	17.6951	17.875	18.0492	17.9036	17.9773	0.130581	0.0403884
Q8TDZ2-4	MICAL1	Isoform 4 of [F-actin]-monooxygenase MICAL1	17.994	17.8887	17.6416	17.8135	18.0315	18.0202	17.7376	17.9499	17.9038	17.9004	17.8992	17.8103	17.6706	17.6852	17.7249	17.8184	17.8698	17.781	0.130077	0.0893323
Q8IVT5	KSR1	Kinase suppressor of Ras 1	17.6616	17.5033	17.7621	17.5145	17.7788	17.8858	17.7105	17.8871	17.7217	17.7877	17.7353	17.6914	17.609	17.7098	17.6654	17.7188	17.6663	17.6366	0.124992	0.0300284
Q14738	PPP2R5D	Serine/threonine-protein phosphatase 2A 56 kDa regulatory subunit delta isoform	16.2182	16.2205	16.2636	16.3767	16.2652	16.2111	16.3132	16.2917	16.3147	16.2276	16.251	16.1732	16.1304	16.0521	16.2723	16.1207	16.1635	16.0861	0.118513	0.0249495
P35606	COPB2	Coatomer subunit beta'	18.9337	19.104	19.1214	19.1691	19.2549	19.1069	19.0829	19.1636	19.0349	19.1496	18.9979	19.2017	18.8603	18.9795	19.0111	18.8933	19.0808	19.0615	0.117	0.0774533
O15357	INPPL1	Phosphatidylinositol 3,4,5-trisphosphate 5-phosphatase 2	19.0687	19.1129	19.2789	19.1855	19.3321	19.2839	19.2979	19.2164	19.2236	19.2878	19.0817	19.1101	19.0537	19.1731	19.1873	19.1399	19.0744	19.2158	0.116467	0.0162142
Q9Y263	PLAA	Phospholipase A-2-activating protein	18.3254	18.4538	18.45	18.5127	18.5408	18.5835	18.6467	18.5607	18.5308	18.5337	18.427	18.5254	18.4378	18.407	18.5254	18.4316	18.5584	18.312	0.115662	0.0689188
Q9Y613	FHOD1	FH1/FH2 domain-containing protein 1	19.7823	19.8298	20.0215	19.8611	19.9701	19.8992	19.8987	19.9577	19.8956	19.466	19.7221	19.8987	19.7304	19.7823	19.8677	19.7072	19.9072	19.7631	0.112957	0.0388932
P46734-3	MAP2K3	Isoform 2 of Dual specificity mitogen-activated protein kinase kinase 3	19.1299	19.2996	19.3349	19.1455	19.3136	19.2878	19.224	19.3173	19.2716	19.3485	19.1517	19.4283	19.0888	19.2549	19.195	19.1782	19.1911	19.1233	0.110991	0.00247951
Q86VP6	CAND1	Cullin-associated NEDD8-dissociated protein 1	20.5667	20.7854	20.7531	20.7318	20.8171	20.7833	20.7803	20.931	20.7376	20.6992	20.5884	20.8144	20.6188	20.6963	20.7318	20.7421	20.7582	20.5752	0.108013	0.0797061
Q9Y2T2	AP3M1	AP-3 complex subunit mu-1	18.8003	18.7745	18.8972	19.1381	18.8192	18.8626	18.8436	18.8277	18.8765	18.6724	18.6617	18.7534	18.7216	18.8217	18.818	18.8409	18.7233	18.7422	0.0648269	0.0527716
P17980	PSMC3	26S proteasome regulatory subunit 6A	19.6059	19.8601	19.5698	19.5543	19.6779	19.6488	19.6926	19.6879	19.659	19.5935	19.7151	19.8123	19.7492	19.7992	19.6925	19.7233	19.7457	19.7298	-0.0495805	0.00839469
Q9Y6Y8	SEC23IP	SEC23-interacting protein	17.9504	18.2615	18.0706	17.9714	18.0706	18.0608	18.1238	18.077	18.0438	18.0147	18.1517	18.17	17.8969	18.1359	18.1811	18.1719	18.1949	18.1508	-0.0994536	0.000678165
Q9P270	SLAIN2	SLAIN motif-containing protein 2	17.9613	18.2051	18.0012	18.0095	18.035	17.8741	18.0055	17.9352	18.0255	18.1318	18.4125	18.1599	18.3527	18.3867	18.0116	18.0202	18.064	18.2039	-0.09985	0.0980355
P49720	PSMB3	Proteasome subunit beta type-3	19.5781	19.8527	19.5293	19.615	19.5662	19.5224	19.6968	19.5307	19.6052	19.4101	19.894	19.8758	19.5107	19.8379	19.6557	19.6698	19.7775	19.6889	-0.1137	0.0339934
Q9Y3C8	UFC1	Ubiquitin-fold modifier-conjugating enzyme 1	18.0151	18.2726	18.0795	18.0781	18.0665	18.0116	18.1736	18.0255	18.0238	18.0047	18.2213	18.2259	18.0985	18.2517	18.0281	18.2921	18.2012	18.2373	-0.129468	0.0693496
Q9UMY4	SNX12	Sorting nexin-12	17.9784	18.2773	18.2171	18.0907	18.214	18.1818	18.1333	18.0942	18.1009	18.2068	18.1894	18.3115	18.0735	18.028	18.2853	18.1866	18.2718	18.4287	-0.14826	0.0233952
Q6PKG0	LARP1	La-related protein 1	17.3998	17.4263	17.4669	17.4811	17.6285	17.4086	17.5962	17.5016	17.5073	17.537	17.4731	17.461	17.3315	17.4713	17.7648	17.6285	17.6371	17.6847	-0.150336	0.0230223
P60900	PSMA6	Proteasome subunit alpha type-6	19.0772	19.4006	19.3396	19.3485	19.1681	19.1873	19.1839	19.2456	19.3637	18.9812	19.4707	19.4707	19.1437	19.6722	19.3396	19.3854	19.3436	19.4795	-0.157286	0.0159667
Q99426	TBCB	Tubulin-folding cofactor B	17.7698	17.9348	17.7319	17.8464	17.7301	17.7328	17.7767	17.7095	17.7982	17.7634	17.989	17.8579	18.0346	18	17.7802	17.9423	17.8867	18.0241	-0.158858	0.0137542
P49721	PSMB2	Proteasome subunit beta type-2	16.8543	17.0284	16.6755	17.0883	16.749	16.7254	16.9104	16.8242	16.7881	16.6536	17.055	17.3086	16.9388	17.1224	16.8493	16.9401	17.013	17.0315	-0.159065	0.0179605
P42331-4	ARHGAP25	Isoform 4 of Rho GTPase-activating protein 25	17.8597	17.8795	17.5885	17.7842	17.5317	17.5811	17.6915	17.6615	17.5597	17.2872	18.0632	18.0074	17.9197	17.8129	17.8248	17.6871	17.8389	17.7071	-0.159401	0.0138091
Q4V328	GRIPAP1	GRIP1-associated protein 1	17.9157	18.1293	17.8646	18.0294	17.8828	17.9195	18.0007	17.898	18.0542	18.04	18.1264	18.1434	17.9648	18.0084	18.013	18.0803	18.0467	18.3171	-0.163255	0.0553539
Q9NVZ3-2	NECAP2	Isoform 2 of Adaptin ear-binding coat-associated protein 2	17.7164	17.8748	17.6783	17.7355	17.8032	17.6272	17.8264	17.7867	17.771	17.8215	17.8847	17.8847	17.7693	17.8091	17.9623	18.0606	17.7478	17.9554	-0.168642	0.0472586
O95319-3	CELF2	Isoform 3 of CUGBP Elav-like family member 2	18.4942	18.3687	18.0942	18.1292	18.0227	18.0562	18.1893	18.0643	18.2013	18.0469	18.3114	18.1462	18.2538	18	18.3258	18.0501	18.3591	18.4125	-0.180117	0.065202
P14621	ACYP2	Acylphosphatase-2	16.1421	17.151	17.1009	17.1249	17.0852	17.1281	17.0172	17.036	17.1408	17.0314	17.3824	17.1285	17.2501	16.948	17.2286	17.2125	17.3328	17.2814	-0.182359	0.00159659
P16930	FAH	Fumarylacetoacetase	18.6209	18.4394	18.7376	18.7585	18.7758	18.7367	18.6654	18.8301	18.7133	18.8405	18.838	18.6856	18.642	18.939	18.868	19.1146	18.8661	18.8801	-0.187933	0.0192568
Q86V88	MDP1	Magnesium-dependent phosphatase 1	16.75	16.9595	16.4184	16.6619	16.5226	16.6005	16.8656	16.8457	16.6749	16.67	17.0189	16.8888	16.8478	16.7649	16.8147	16.7861	16.9497	17.0267	-0.192477	0.072631
Q9Y266	NUDC	Nuclear migration protein nudC	17.9139	18.0886	17.8404	17.9689	17.9641	17.7945	17.9949	17.8317	17.9315	17.9094	18.0814	18.0814	18.0539	18.0407	18.0255	18.0353	18.1614	18.1833	-0.198055	0.0102076
Q53QZ3	ARHGAP15	Rho GTPase-activating protein 15	16.7886	16.9983	16.37	16.8355	16.5315	16.3691	16.677	16.4647	16.4922	16.4342	16.7236	16.8945	16.7217	16.6919	16.6774	16.4619	16.8015	16.893	-0.20153	0.0832571
Q13057-2	COASY	Isoform 2 of Bifunctional coenzyme A synthase	16.9776	17.2598	16.9179	17.0844	17.023	17.0304	17.077	16.9327	17.0628	16.8464	17.069	17.1157	17.5642	17.1145	17.438	17.0438	17.237	17.24	-0.214505	0.0259865
Q9HAB8	PPCS	Phosphopantothenate--cysteine ligase	18.451	18.7535	18.6812	18.7208	18.6322	18.6447	18.6941	18.6823	18.663	18.6686	18.8679	18.6609	18.7594	18.7342	18.6791	18.9784	19.0591	18.797	-0.215113	0.0264098
Q96DB5	RMDN1	Regulator of microtubule dynamics protein 1	17.5287	17.7175	17.4756	17.2032	17.3668	17.4052	17.4809	17.4727	17.3337	17.5203	17.4762	17.4512	17.5368	17.5426	17.4119	17.8589	17.6479	17.596	-0.216847	0.0416731
Q8N6M0	OTUD6B	Deubiquitinase OTUD6B	17.0642	17.1077	16.6424	17.0037	16.8751	16.7344	17.0761	17.0665	17.1511	16.9607	17.5052	17.2731	17.2778	17.282	17.0396	17.1523	17.2494	17.3737	-0.223116	0.0753723
Q15370-2	ELOB	Isoform 2 of Elongin-B	19.3547	19.5623	19.3705	19.5102	19.4015	19.3675	19.6368	19.4057	19.5771	19.4069	19.5578	19.6803	19.4113	19.4399	19.6397	19.6128	19.7166	19.8385	-0.22419	0.0210136
Q01469	FABP5	Fatty acid-binding protein 5	17.0766	17.2676	16.8593	17.0304	17.0758	16.8974	16.9128	16.7631	17.0239	16.9731	17.1917	17.1755	16.8569	16.8942	17.0942	17.1285	17.0434	17.3782	-0.226501	0.0398325
Q6ZMI0	PPP1R21	Protein phosphatase 1 regulatory subunit 21	17.0106	16.9504	16.5688	17.0014	16.6424	16.6366	16.9593	16.6027	16.9131	16.7725	17.2026	16.7705	17.2788	17.4651	17.1698	16.766	16.9332	17.0434	-0.227279	0.0878784
Q96IV0	NGLY1	Peptide-N(4)-(N-acetyl-beta-glucosaminyl)asparagine amidase	16.978	17.4045	16.9632	17.4737	16.8625	17.0053	17.2668	17.0744	17.1273	16.983	17.472	17.2193	17.2751	17.3951	17.211	17.0844	17.5012	17.4063	-0.233456	0.0757774
Q9UBB4	ATXN10	Ataxin-10	17.7531	18.2206	17.7998	17.6162	17.7512	17.8864	17.7106	17.8878	17.7751	17.7328	18.0731	17.8971	18.1952	17.7603	18.2831	17.7512	17.9474	18.1878	-0.240143	0.0714298
Q8IZD2-5	KMT2E	Isoform 5 of Inactive histone-lysine N-methyltransferase 2E	15.4734	14.6894	14.4536	15.2475	15.0569	15.1247	15.0845	15.207	15.1141	15.4216	15.4411	14.9517	15.5833	15.3106	15.2565	15.0525	15.65	15.4962	-0.246324	0.0774665
P62942	FKBP1A	Peptidyl-prolyl cis-trans isomerase FKBP1A	17.0867	17.2813	17.1004	17.5043	16.9682	16.9881	17.1882	16.9876	17.2356	16.8396	17.3787	17.0515	17.17	17.2052	17.4748	17.5008	17.0625	17.2459	-0.247439	0.0620744
P02679	FGG	Fibrinogen gamma chain	22.855	22.7084	22.5357	23.2181	22.8869	22.8345	22.855	22.8345	23.1038	23.1038	23.0355	22.855	23.1135	22.855	23.1038	22.9828	23.3557	23.1745	-0.251283	0.0264864
P00441	SOD1	Superoxide dismutase [Cu-Zn]	18.3158	18.3675	18.2692	18.3947	17.966	18.2326	18.4649	18.3525	18.5275	18.2446	18.4602	18.3319	18.76	18.7167	18.4488	18.5981	18.5641	18.6297	-0.251488	0.0702948
O95630	STAMBP	STAM-binding protein	19.0628	19.2663	18.6352	18.9092	18.6663	18.6081	18.8599	18.7941	18.8809	18.7094	19.0722	19.0747	19.1562	19.6536	19.2164	18.9408	18.8633	19.0331	-0.251545	0.0271563
O00233	PSMD9	26S proteasome non-ATPase regulatory subunit 9	18.0784	18.235	18.1066	18.1499	18.0515	18.1178	18.1119	18.0244	18.1151	18.1161	18.2458	18.1603	18.2677	18.2408	18.4512	18.3436	18.2374	18.3198	-0.25388	0.00073012
P61970	NUTF2	Nuclear transport factor 2	18.0458	18.3693	18.0581	18.1886	18.1274	18.1044	17.9106	17.5975	18.0742	18.0598	18.0476	18.0919	17.8504	18.0028	18.2357	18.1632	18.1421	18.3693	-0.264728	0.0646867
Q99969	RARRES2	Retinoic acid receptor responder protein 2	18.3095	18.2581	18.0819	18.2558	17.7202	17.9304	18.0136	17.6852	17.9947	17.9195	18.3289	18.166	18.2156	18.6449	17.863	18.0635	18.1962	18.4199	-0.266819	0.0781045
P35244	RPA3	Replication protein A 14 kDa subunit	16.1589	16.5242	16.361	16.4027	16.1776	16.2469	15.8193	16.309	16.2738	15.9366	16.2018	16.3456	16.1608	15.998	16.3081	16.3792	16.6563	16.3889	-0.267808	0.0631671
P14735	IDE	Insulin-degrading enzyme	18.2181	18.4096	17.8476	18.2264	18.0207	17.9103	18.3752	17.8379	17.9782	17.8443	18.5154	18.2118	18.3491	18.203	18.2403	18.1978	18.3911	18.3475	-0.26972	0.0478851
P16455	MGMT	Methylated-DNA--protein-cysteine methyltransferase	18.4291	18.3126	18.1232	18.0515	18.2958	18.0883	18.2153	18.331	18.0819	18.1171	18.1717	18.2945	18.4509	18.2314	18.3959	18.8588	18.413	18.2672	-0.28127	0.0633105
P68106	FKBP1B	Peptidyl-prolyl cis-trans isomerase FKBP1B	16.0389	16.6598	16.1952	16.131	16.1128	16.2147	16.1097	15.9889	16.2551	16.4082	16.1697	16.2977	16.3749	16.0149	16.1893	16.6133	16.6151	16.2554	-0.282062	0.0413499
P49773	HINT1	Histidine triad nucleotide-binding protein 1	19.0633	19.3761	18.7954	19.2219	18.8017	18.9348	19.3364	18.9893	19.1418	18.9985	19.3585	19.3316	19.184	19.2865	19.3637	19.062	19.4381	19.428	-0.282129	0.0665154
Q96DT6	ATG4C	Cysteine protease ATG4C	17.4139	17.8123	17.5525	17.551	17.445	17.4887	17.7235	17.2717	17.3437	17.3568	17.8421	17.532	17.8073	17.8611	17.701	17.537	17.809	17.9206	-0.287369	0.0387647
Q9H1B5	XYLT2	Xylosyltransferase 2	17.294	17.3084	17.2771	18.014	17.0953	17.0396	17.1571	17.0717	17.3796	17.0671	17.721	16.8767	17.2606	17.4098	17.2059	17.7842	17.1894	17.5657	-0.28765	0.0872163
P40306	PSMB10	Proteasome subunit beta type-10	16.5667	16.9245	16.3713	16.392	16.3664	16.2138	16.7761	16.501	16.4414	16.2636	17.2783	16.9643	16.6486	17.0393	16.4516	16.6794	17.0404	16.8399	-0.293112	0.0945262
P00491	PNP	Purine nucleoside phosphorylase	20.6965	20.7074	20.2839	20.6761	20.3038	20.2686	20.5874	20.3156	20.6056	20.1598	20.6025	20.7809	20.7893	21.0276	20.4931	20.8541	20.7754	20.7258	-0.295901	0.0291349
P46926	GNPDA1	Glucosamine-6-phosphate isomerase 1	17.7972	17.6913	17.1895	17.1065	17.301	17.3495	17.3477	17.3243	17.392	17.108	17.5619	17.3356	17.1869	17.3034	17.7166	17.5531	17.488	17.8116	-0.299395	0.0029841
P05121	SERPINE1	Plasminogen activator inhibitor 1	19.6684	20.0959	18.9784	19.6811	19.6225	19.5985	19.9228	19.1887	19.8512	20.106	19.8433	19.8118	19.5927	19.69	19.9799	19.8426	19.9031	20.0483	-0.306779	0.0815999
P07108-5	DBI	Isoform 5 of Acyl-CoA-binding protein	18.0713	18.6371	17.9088	18.2642	17.9584	17.7953	18.0744	17.6489	18.3585	17.9796	18.5768	18.4729	18.2281	18.2845	18.16	18.1009	18.4296	18.4162	-0.309547	0.089108
Q9NRR5	UBQLN4	Ubiquilin-4	16.5394	16.6037	16.2221	16.8113	16.1834	16.0722	16.5844	16.1615	16.5053	16.2157	16.7897	16.6653	16.6354	16.3842	16.4783	16.5336	16.6978	16.7579	-0.315578	0.044771
Q8WZA9	IRGQ	Immunity-related GTPase family Q protein	17.1379	17.3544	16.8566	16.8867	16.6055	16.5688	17.0629	16.6512	16.7922	16.7711	17.193	17.2454	17.0799	16.8735	17.0516	16.6548	17.3034	17.2301	-0.323849	0.0877426
Q9Y6I3-1	EPN1	Isoform 2 of Epsin-1	18.1191	18.2544	17.9611	17.9481	17.9195	17.7965	18.2151	17.5914	17.7988	17.7699	18.189	18.0688	17.8101	17.9625	18.229	17.8758	18.1992	18.4729	-0.329997	0.0755397
P35241-5	RDX	Isoform 5 of Radixin	18.5607	18.8003	18.203	18.1593	18.2083	18.241	18.5155	18.3045	18.4716	18.3289	18.7227	18.802	18.5627	18.6799	18.5538	18.5637	18.7556	18.8586	-0.334729	0.0101528
Q12805	EFEMP1	EGF-containing fibulin-like extracellular matrix protein 1	17.566	17.9058	16.9118	17.4422	16.9372	16.9131	17.4991	17.4169	17.3608	17.1467	17.5461	17.6694	17.6875	17.7101	17.322	17.4001	17.7787	17.7414	-0.335113	0.0962298
Q9GZT8	NIF3L1	NIF3-like protein 1	17.1105	17.0725	16.624	16.9739	16.4433	16.5798	16.7455	16.2532	16.8286	16.133	17.0024	16.9051	16.9245	16.9843	16.7332	16.6539	17.0604	17.1917	-0.339702	0.0755509
Q9NSB8	HOMER2	Homer protein homolog 2	18.0354	17.84	17.3868	17.8244	17.299	17.3621	17.6763	17.4021	17.636	17.606	17.5209	17.9756	17.6668	18.0109	17.6828	17.9224	17.7997	17.8582	-0.340697	0.00987043
Q96EK5	KIF1BP	KIF1-binding protein	15.4762	15.6269	15.4026	15.3525	15.2033	15.2565	15.4928	15.4717	15.1975	15.4076	15.6249	15.5583	15.1754	15.4415	15.8536	15.3712	15.6905	15.7541	-0.343007	0.022602
P50897	PPT1	Palmitoyl-protein thioesterase 1	16.5041	16.4006	16.131	16.2602	15.9417	15.9327	16.0504	16.0185	15.7528	16.0623	16.2909	16.2964	16.2481	16.4135	16.2652	16.133	16.3942	16.3837	-0.354815	0.00292331
P45974	USP5	Ubiquitin carboxyl-terminal hydrolase 5	19.1265	19.426	18.7224	18.972	18.7704	18.73	19.2954	18.6972	18.9631	18.7614	19.4226	19.3762	19.2834	19.3363	19.3025	18.844	19.3753	19.4991	-0.364025	0.0798958
Q8N573	OXR1	Oxidation resistance protein 1	18.3077	18.492	18.0192	18.1262	17.8719	17.8404	18.4089	17.8958	18.3462	17.9226	18.5256	18.5198	18.4425	18.4241	18.4346	18.194	18.5057	18.6143	-0.364512	0.059284
O43847-2	NRDC	Isoform 2 of Nardilysin	19.8171	19.7837	19.1466	19.5579	19.2087	19.1601	19.7206	19.1069	19.4466	19.1744	20.0071	19.7299	19.8341	19.613	19.6631	19.3925	19.8205	19.9072	-0.367223	0.0588286
Q8IXJ6	SIRT2	NAD-dependent protein deacetylase sirtuin-2	18.5076	18.8402	18.0423	19.0022	18.45	17.9215	18.8582	18.2865	18.2205	18.0304	18.9395	18.4826	18.5788	18.3923	18.8703	18.385	18.8336	18.8336	-0.383296	0.0991339
Q9UBQ7	GRHPR	Glyoxylate reductase/hydroxypyruvate reductase	17.9158	17.9017	17.2729	18.006	17.0595	17.4258	17.8881	17.3912	17.8021	17.4856	17.9739	18.1772	17.9817	18.2067	17.7835	17.9403	17.8637	18.0323	-0.391584	0.0623661
Q9Y547	HSPB11	Intraflagellar transport protein 25 homolog	16.4457	17.0251	16.9752	16.7199	16.7519	16.9193	16.829	16.277	16.6816	16.8751	17.2892	16.9503	16.6568	16.7329	16.9124	17.2191	16.959	17.3103	-0.408451	0.0312969
Q9P0T7	TMEM9	Transmembrane protein 9	15.8674	15.0647	14.9363	15.8984	14.9026	14.74	15.5276	14.9312	15.0907	15.5261	15.5984	15.5099	15.4982	15.3379	15.3988	15.0749	15.5816	15.8185	-0.430033	0.0745479
P07737	PFN1	Profilin-1	21.5794	21.748	21.0715	21.4417	20.9586	20.931	21.6538	21.0132	21.4417	20.9798	21.6873	21.6873	21.4475	21.7146	21.4644	21.5089	21.6538	21.9292	-0.439447	0.0539977
Q9H008	LHPP	Phospholysine phosphohistidine inorganic pyrophosphate phosphatase	17.7543	17.7584	17.1929	17.5016	17.1626	17.4097	17.4732	17.4327	17.5559	16.9199	17.7408	17.7408	17.4802	17.5642	17.8653	17.6087	17.7515	18.187	-0.446315	0.0114985
Q92973	TNPO1	Transportin-1	18.2328	18.5832	18.1185	18.2655	18.1694	18.0172	18.4111	18.4225	17.8906	18.1369	18.4229	18.2996	18.3178	18.4088	19.1803	18.3269	18.5172	18.4958	-0.447869	0.0642633
Q9GZX9	TWSG1	Twisted gastrulation protein homolog 1	16.3167	17.0354	16.3098	16.6816	16.4688	16.3983	16.5387	16.2832	16.382	16.2891	17.0387	17.0279	16.3428	16.7055	16.4279	16.9682	16.8784	17.1797	-0.449377	0.0186049
O14618	CCS	Copper chaperone for superoxide dismutase	20.0517	20.6406	19.4796	20.4051	19.6037	20.0891	20.1984	19.8611	20.5104	19.421	20.7157	20.6144	20.8932	20.1725	20.6235	19.9628	20.7018	20.7535	-0.45787	0.0954166
P15924	DSP	Desmoplakin	17.6152	17.3763	17.1511	17.314	17.1395	16.7259	17.1761	16.7487	17.1579	17.3131	17.5186	17.2174	17.4884	17.4386	17.7607	17.4012	17.6351	16.9993	-0.459441	0.044456
Q9H9H4	VPS37B	Vacuolar protein sorting-associated protein 37B	19.327	19.3983	18.6663	19.3095	18.4729	18.8685	19.5081	18.9348	19.0789	18.7457	19.5505	19.5385	19.4685	19.4576	19.2354	19.4101	19.5826	19.5066	-0.461025	0.0553415
P04264	KRT1	Keratin, type II cytoskeletal 1	20.8828	20.9357	20.8137	20.5814	20.2594	20.3721	20.6644	20.4766	20.3963	20.61	21.2159	20.6809	20.6496	20.9177	21.3466	20.6283	21.1665	20.5143	-0.480182	0.0421838
P03950	ANG	Angiogenin	17.184	17.2431	15.9232	16.6783	16.1207	16.1893	16.9411	16.7692	16.8625	16.516	17.1442	17.3203	17.062	17.4115	16.9706	16.6688	17.307	17.2881	-0.482084	0.0827775
P05067	APP	Amyloid-beta precursor protein	20.8775	21.0217	20.0787	20.4892	20.3637	20.3583	20.8308	20.4509	20.6947	20.6056	20.796	20.8723	20.7359	20.8373	21.4417	20.6452	20.8677	21.1586	-0.488621	0.0343988
P35527	KRT9	Keratin, type I cytoskeletal 9	19.2485	19.2726	18.972	18.9631	18.5963	18.6528	19.0621	18.6411	18.8409	18.8765	19.4982	19.1168	19.3055	19.2294	19.8051	18.9396	19.4101	18.8555	-0.493982	0.0573866
Q5TFE4	NT5DC1	5'-nucleotidase domain-containing protein 1	19.155	19.3303	19.2976	18.4838	18.2122	19.0253	19.1504	18.3317	18.7329	18.3561	19.2063	19.1625	19.0342	19.1513	19.0669	19.3658	19.2284	19.0953	-0.49857	0.0560725
Q92520	FAM3C	Protein FAM3C	17.4685	17.8114	16.4382	16.9912	16.7819	16.6244	17.3083	16.8194	16.9899	17.2068	17.2916	17.5355	17.4534	17.3222	17.1765	16.9616	17.611	17.8843	-0.503572	0.0608319
Q96AC1-3	FERMT2	Isoform 3 of Fermitin family homolog 2	18.5649	18.1773	17.9345	18.0373	17.9253	17.6056	17.967	17.6654	17.5667	17.7301	17.6592	18.4386	17.8681	18.0461	18.331	18.0973	18.3955	18.1987	-0.509653	0.002554
P36639	NUDT1	7,8-dihydro-8-oxoguanine triphosphatase	17.5111	17.2081	17.1948	17.3695	16.9249	17.0086	17.2401	17.2258	17.1765	16.9562	17.7974	17.5954	17.6287	17.6249	17.445	17.7769	17.2875	17.9903	-0.509745	0.0140002
P13807	GYS1	Glycogen [starch] synthase, muscle	18.1123	18.094	16.9431	17.7817	16.9739	17.2216	17.9938	17.3551	17.4946	16.8817	17.9048	17.9761	17.7224	18.0647	18.0601	17.4399	17.9383	18.2489	-0.514036	0.0742688
O60739	EIF1B	Eukaryotic translation initiation factor 1b	16.2103	16.6638	15.2599	16.1984	15.4937	15.4814	16.1402	15.416	15.8509	15.3093	16.5755	16.2065	16.1909	16.5353	16.2147	15.6551	16.3687	16.6205	-0.53833	0.0587361
Q08830	FGL1	Fibrinogen-like protein 1	17.6219	18.1163	16.9671	18.2282	16.8167	17.0486	17.5618	16.9403	16.7861	16.8167	17.4064	17.5814	18.0233	17.4142	17.4964	17.2901	18.258	17.315	-0.559152	0.0649572
Q9Y3C4-3	TPRKB	Isoform 3 of EKC/KEOPS complex subunit TPRKB	16.6129	17.2014	15.9015	16.5611	15.9498	15.9487	16.6809	16.246	16.5449	15.8996	17.3195	17.2678	16.8943	17.0015	16.7964	16.3147	17.4009	16.8233	-0.559756	0.0674752
Q9NWV8	BABAM1	BRISC and BRCA1-A complex member 1	17.0097	17.1113	17.7512	16.9327	16.7415	16.9403	16.8713	16.4792	16.5884	16.7098	16.8927	16.9043	17.0107	16.8168	17.2459	17.9056	17.052	16.9769	-0.570959	0.0295217
P05154	SERPINA5	Plasma serine protease inhibitor	19.2083	19.1223	17.5908	18.8262	17.7084	17.7802	19.0945	17.9998	18.7954	17.7982	19.1518	18.9463	19.3566	18.9838	18.9812	18.7244	19.0184	18.878	-0.624814	0.0953881
P10644	PRKAR1A	cAMP-dependent protein kinase type I-alpha regulatory subunit	20.67	20.6123	21.5201	19.6992	19.9079	20.1975	20.5844	19.6557	19.7178	21.0933	20.56	20.5825	20.6123	20.5029	20.1975	20.7966	20.8679	20.6989	-0.627586	0.0321918
Q9Y237-2	PIN4	Isoform 2 of Peptidyl-prolyl cis-trans isomerase NIMA-interacting 4	18.5424	18.8006	17.875	18.8685	17.8411	17.9925	18.4876	17.2948	18.5419	17.4684	18.8059	18.5526	18.8981	18.646	19.3296	18.2511	18.6784	18.5933	-0.68152	0.0752467
Q9GZP8	IMUP	Immortalization up-regulated protein	17.1543	17.203	16.4175	16.0978	16.0953	15.9366	16.7841	16.5198	16.0551	16.172	16.5874	16.9813	17.035	16.9049	16.3942	16.8669	17.1796	17.5122	-0.710054	0.0373261
Q15637-5	SF1	Isoform 5 of Splicing factor 1	12.5939	14.6672	13.4744	13.0636	13.3385	13.4242	12.9109	13.1721	12.0719	13.01	13.2832	14.6166	14.0127	12.7558	13.3385	13.6849	13.3763	14.7408	-0.80161	0.084757
O75531	BANF1	Barrier-to-autointegration factor	14.224	15.129	14.0718	15.4698	13.6812	14.603	15.022	14.4584	14.4178	14.3829	15.4319	14.671	15.1188	14.9289	15.708	14.4109	15.3856	15.6464	-0.851252	0.0504099
P01593	IGKV1D-33	Immunoglobulin kappa variable 1D-33	19.9177	20.2305	18.5596	19.6461	18.5401	18.6046	19.4859	19.0042	19.3984	18.4338	20.035	19.5447	19.7674	19.8797	19.615	18.891	20.3445	20.6486	-0.868136	0.0720956
O75460	ERN1	Serine/threonine-protein kinase/endoribonuclease IRE1	17.104	16.7135	16.6005	17.0414	16.5929	16.3884	17.3147	16.2551	16.6629	16.4175	17.5872	16.9401	17.3623	17.7392	17.7722	16.6998	17.387	18.9843	-1.06802	0.0568749
P26447	S100A4	Protein S100-A4	21.6648	21.5271	22.3503	19.8973	20.0362	19.8274	20.478	19.7544	21.6238	21.7225	21.4188	21.4736	21.4188	21.5692	21.3871	21.1779	21.5692	21.6648	-1.10582	0.0282366
P20962	PTMS	Parathymosin	18.676	18.9064	16.2868	18.8299	16.2905	16.2221	17.5975	16.0814	17.7629	16.2738	18.8652	18.581	18.3041	18.2361	18.7807	16.6726	18.218	18.8419	-1.33744	0.0634754
P15056	BRAF	Serine/threonine-protein kinase B-raf	19.3193	19.8803	17.5695	19.994	17.0053	17.1004	19.732	17.3728	19.195	17.1747	19.5324	19.446	19.5873	19.7013	20.54	18.5878	19.5873	19.77	-1.54018	0.0759942
P01704	IGLV2-14	Immunoglobulin lambda variable 2-14	17.5704	17.4698	15.506	18.7717	15.1031	15.0202	16.7044	15.0946	15.6044	15.2296	17.1024	17.3685	17.3191	16.4646	18.6274	15.357	17.1193	17.553	-1.65882	0.0490753

## Sheet: MCI-A(-) vs SMI
Accession	Gene name	Description	AD-1	AD-2	AD-3	AD-4	MCI-A(+)-1	MCI-A(+)-2	MCI-A(+)-3	MCI-A(+)-4	MCI-A(+)-5	MCI-A(-)-1	MCI-A(-)-2	MCI-A(-)-3	MCI-A(-)-4	MCI-A(-)-5	SMI-1	SMI-2	SMI-3	SMI-4	log2 FC	p value
Q9BYC5	FUT8	Alpha-(1,6)-fucosyltransferase	18.5213	19.4118	17.2431	18.6322	17.4007	18.2837	18.7082	18.3442	18.0873	18.2191	18.686	19.2973	18.9665	18.6402	17.6696	17.5525	18.5874	18.493	0.686198	0.0640686
Q562R1	ACTBL2	Beta-actin-like protein 2	17.5586	17.7985	17.7779	17.5484	17.899	17.675	17.3927	16.9193	17.3787	17.5255	17.8391	18.3564	17.6784	18.2997	17.0913	17.3573	17.4182	17.4221	0.617644	0.0178973
Q9Y223-2	GNE	Isoform 2 of Bifunctional UDP-N-acetylglucosamine 2-epimerase/N-acetylmannosamine kinase	16.2731	16.5018	16.0848	15.9543	16.0326	16.1287	16.0869	16.0061	15.7605	16.0185	16.853	16.5392	16.6285	17.0343	16.0938	16.0484	16.0451	16.1051	0.541587	0.0279159
O43760-2	SYNGR2	Isoform 2 of Synaptogyrin-2	18.6275	17.654	18.2394	17.4543	18.1499	18.3403	17.8531	18.4255	17.9068	18.3302	17.9402	17.9117	18.1842	18.2004	17.3319	17.6791	17.6973	17.5995	0.536403	0.00262075
P12724	RNASE3	Eosinophil cationic protein	17.548	17.4468	17.2704	17.1217	16.9671	18.0635	17.1222	17.9813	17.522	17.1902	17.625	18.5237	17.3535	17.6627	16.9309	17.2251	17.3544	17.0945	0.5198	0.0986715
Q96T76-8	MMS19	Isoform 5 of MMS19 nucleotide excision repair protein homolog	18.072	18.078	18.3668	18.4114	18.301	18.2507	18.1363	18.3027	18.0954	18.4658	19.1934	18.5101	19.2378	18.365	18.2246	18.4596	18.3108	18.0925	0.482547	0.0697998
Q99418	CYTH2	Cytohesin-2	18.9328	19.1841	18.7507	18.3454	18.8044	18.731	18.5734	18.4078	18.4183	18.8028	19.5516	18.7601	19.0238	19.1288	18.4918	18.389	18.8145	18.7049	0.453391	0.0417576
Q14204	DYNC1H1	Cytoplasmic dynein 1 heavy chain 1	20.2637	20.3334	20.875	20.4931	21.3372	20.4398	20.9382	20.5509	20.5592	20.9532	20.6559	20.4477	20.5973	20.5877	20.4961	20.1229	20.1474	20.0998	0.431805	0.0108112
P23443	RPS6KB1	Ribosomal protein S6 kinase beta-1	16.5091	17.0381	16.3488	16.5791	16.4922	16.6165	16.7848	16.6055	16.7038	16.586	17.5213	16.9313	16.8899	17.1787	16.5748	16.4913	16.6964	16.8229	0.375067	0.0868719
Q13103	SPP2	Secreted phosphoprotein 24	17.1819	17.0091	16.5929	17.2704	16.7878	16.7588	17.2875	16.7829	17.375	17.2587	17.5712	17.086	17.7983	17.515	16.9548	16.9876	17.3914	16.9935	0.363991	0.0666645
P51648-2	ALDH3A2	Isoform 2 of Fatty aldehyde dehydrogenase	17.3968	17.6193	17.8779	17.0913	17.8426	17.9253	17.8238	17.6975	17.3813	17.6897	17.822	17.4776	17.8951	17.5262	17.1249	17.7374	17.4631	16.95	0.363309	0.0825382
P62701	RPS4X	40S ribosomal protein S4, X isoform	18.9975	19.0865	18.9058	18.6172	19.1903	19.3969	19.2771	19.3049	18.6763	19.1151	18.9824	19.2771	18.9363	19.339	18.8598	18.3635	19.1015	18.7887	0.351622	0.0665266
Q6ULP2-9	AFTPH	Isoform 5 of Aftiphilin	18.5984	18.0096	17.6128	18.6312	17.9563	17.4628	18.1971	17.8257	18.3704	18.0116	18.1241	18.3154	18.2735	18.3322	17.8325	17.5476	18.0443	18.1675	0.313356	0.057973
Q9Y5S2	CDC42BPB	Serine/threonine-protein kinase MRCK beta	19.7035	19.8721	19.1873	19.4498	19.5907	19.3339	19.8805	19.4975	19.4796	19.601	19.7824	19.8441	19.8326	19.8657	19.249	19.3223	19.8368	19.5353	0.299277	0.051893
O75843	AP1G2	AP-1 complex subunit gamma-like 2	16.5958	16.5609	16.6082	16.4944	16.8112	16.7058	16.4585	16.256	16.6177	16.5955	16.5055	16.6189	16.3946	16.5599	16.4225	15.8579	16.4409	16.2349	0.295854	0.0529019
P08575	PTPRC	Receptor-type tyrosine-protein phosphatase C	20.4021	19.8495	20.0194	20.54	20.5814	19.5771	19.8556	19.382	19.925	20.0817	19.9212	19.9207	20.0655	19.9495	19.9788	19.2572	19.7139	19.8773	0.280922	0.0952718
Q02218	OGDH	2-oxoglutarate dehydrogenase, mitochondrial	18.5532	17.9718	18.0657	17.7328	17.8147	18.3061	17.7353	17.6329	17.5037	17.9743	17.5562	17.9885	18.311	17.9527	17.7456	17.7071	17.5749	17.6983	0.275033	0.0896913
Q9UI08-2	EVL	Isoform 1 of Ena/VASP-like protein	15.3735	15.338	14.914	15.1886	15.3704	15.2809	15.2801	15.4997	15.4616	15.4122	15.376	15.4121	15.4404	15.4451	15.2068	14.7499	15.3239	15.2965	0.272898	0.0545446
P42224	STAT1	Signal transducer and activator of transcription 1-alpha/beta	17.9273	18.0945	18.2746	18.0774	18.2948	18.2822	18.1208	18.1811	18.1519	18.4267	18.6672	18.1369	18.3135	18.2441	18.2326	18.0509	18.1285	17.9349	0.27097	0.053119
P62244	RPS15A	40S ribosomal protein S15a	16.5245	16.3075	16.5106	16.0681	17.0368	17.1625	16.4377	17.1523	16.3223	16.9312	16.334	16.7799	16.5599	16.7996	16.4963	16.3921	16.2913	16.4808	0.26583	0.0734205
P19474	TRIM21	E3 ubiquitin-protein ligase TRIM21	20.3133	20.5071	20.106	20.5354	20.2923	20.0458	20.3728	19.8108	20.5814	20.2486	20.6154	20.3658	20.4656	20.475	20.1499	19.8793	20.2884	20.4109	0.251956	0.077476
Q9Y6G9	DYNC1LI1	Cytoplasmic dynein 1 light intermediate chain 1	18.5185	18.8843	18.8106	18.7592	18.9649	18.5275	19.1322	18.6293	18.7343	18.7776	18.9915	18.7844	18.9915	18.8565	18.6046	18.3992	18.8337	18.6782	0.251386	0.0342152
Q96D46	NMD3	60S ribosomal export protein NMD3	17.2944	17.5113	17.1516	17.0452	17.36	17.2258	17.2363	17.0901	17.0778	17.3017	17.5113	17.3331	17.4061	17.0692	17.0892	17.1441	17.2872	16.8066	0.242512	0.08588
Q8NEW0	SLC30A7	Zinc transporter 7	17.0196	16.675	16.6906	17.0516	16.6749	16.6619	16.7951	16.6348	16.9193	16.7128	16.7925	16.6897	17.0378	16.8926	16.7861	16.3664	16.5432	16.6358	0.242184	0.0560085
O15027-5	SEC16A	Isoform 5 of Protein transport protein Sec16A	16.909	17.0803	17.0638	16.8182	17.2318	17.2554	16.9375	16.5816	16.9553	17.1303	17.0045	17.0981	17.1109	16.8261	16.9244	16.6854	16.9897	16.5958	0.235161	0.0590682
P07910	HNRNPC	Heterogeneous nuclear ribonucleoproteins C1/C2	19.0745	18.472	18.4953	18.2853	18.383	18.7807	18.1394	19.062	18.397	18.3473	18.5849	18.8376	18.3801	18.408	18.1492	18.297	18.2749	18.3912	0.233511	0.076306
Q5XPI4-2	RNF123	Isoform 2 of E3 ubiquitin-protein ligase RNF123	17.3987	17.307	17.4119	17.1073	17.4938	17.4677	17.0716	17.3993	16.9562	17.3176	17.2798	17.1836	17.5331	17.4616	17.0691	17.0605	17.1914	17.1686	0.232736	0.0196913
Q9BZH6	WDR11	WD repeat-containing protein 11	18.9282	19.0547	18.7869	18.7544	18.9834	18.7457	18.9671	18.8574	18.7653	18.8378	18.8178	18.9736	19.0003	18.915	18.7564	18.4432	18.8206	18.6968	0.229651	0.0281968
Q969X1	TMBIM1	Protein lifeguard 3	17.3595	16.9925	17.5531	17.0974	17.1328	17.2237	16.962	16.3147	17.2251	17.2605	17.023	16.967	17.2462	17.0383	16.9278	16.6522	16.8119	17.1178	0.229565	0.0761664
O15204	ADAMDEC1	ADAM DEC1	18.0164	17.7247	17.9395	17.7319	17.8317	18.0582	17.7032	17.966	17.9444	17.9056	18.01	18.0306	17.8693	18.0682	17.6975	17.6623	17.6461	17.9863	0.228684	0.0277178
Q9HA65	TBC1D17	TBC1 domain family member 17	16.5988	16.7405	16.9084	17.0141	17.2356	16.6571	16.6816	16.6378	16.7748	17.0649	16.971	16.765	16.829	16.9117	16.5362	16.7605	16.7212	16.7212	0.223537	0.0196343
P19525	EIF2AK2	Interferon-induced, double-stranded RNA-activated protein kinase	18.6709	18.51	18.5788	18.8349	18.7442	18.7685	18.7277	18.5745	18.7046	18.7653	19.0358	18.6722	18.7997	18.7347	18.8605	18.5596	18.5002	18.4243	0.215408	0.0901825
Q9P270	SLAIN2	SLAIN motif-containing protein 2	17.9613	18.2051	18.0012	18.0095	18.035	17.8741	18.0055	17.9352	18.0255	18.1318	18.4125	18.1599	18.3527	18.3867	18.0116	18.0202	18.064	18.2039	0.213819	0.0284682
Q8TBC4	UBA3	NEDD8-activating enzyme E1 catalytic subunit	19.4433	19.3642	19.1941	19.4796	19.2726	19.2484	19.4149	19.4531	19.3925	19.5247	19.5918	19.3542	19.6789	19.5317	19.3447	19.1887	19.4502	19.3867	0.193693	0.0414317
Q96JJ3	ELMO2	Engulfment and cell motility protein 2	18.2253	17.5924	18.1719	17.9288	18.5478	18.2275	18.0151	18.1519	18.1545	17.9757	17.8521	17.7516	17.8375	17.8686	17.7965	17.4799	17.6994	17.6994	0.188278	0.0338308
P51114	FXR1	Fragile X mental retardation syndrome-related protein 1	18.5711	18.8351	18.731	18.7068	18.924	18.8262	18.7388	18.7094	18.7429	18.8857	18.806	18.7072	18.8731	18.7907	18.4993	18.5566	18.7669	18.7215	0.176423	0.0339813
Q08AM6	VAC14	Protein VAC14 homolog	16.9169	17.0583	16.7605	16.9095	16.885	16.9294	17.1173	17.0758	16.8457	16.8355	17.0268	17.0087	17.1186	17.1251	16.8962	16.7618	16.8554	16.9187	0.164913	0.0428388
P07332	FES	Tyrosine-protein kinase Fes/Fps	17.7319	17.9421	17.9246	17.8758	18.0902	17.7733	17.7221	17.6999	17.8708	17.9751	17.8176	17.9216	17.8832	17.9618	17.8426	17.7319	17.6973	17.7221	0.16338	0.00670831
Q96AX1	VPS33A	Vacuolar protein sorting-associated protein 33A	16.6197	16.7654	16.9424	17.1615	16.9904	16.9262	17.0988	16.9912	16.8344	16.9112	16.7855	17.0577	16.9948	17.0042	16.9467	16.7692	16.6113	16.8361	0.15988	0.0916352
Q96IU4	ABHD14B	Protein ABHD14B	18.6852	18.9007	18.8588	18.6596	18.8845	18.7494	18.6094	18.662	18.7564	18.7941	18.9118	18.7927	18.674	18.9007	18.5491	18.5662	18.7018	18.8172	0.156052	0.072784
Q9Y5P4-3	COL4A3BP	Isoform 3 of Collagen type IV alpha-3-binding protein	18.5991	18.7112	18.3317	18.6791	18.5337	18.5208	18.725	18.6486	18.5401	18.5283	18.8611	18.6592	18.7528	18.8414	18.625	18.536	18.55	18.5902	0.153291	0.0708208
Q9UIA9	XPO7	Exportin-7	19.1877	19.0281	18.9834	19.3984	18.9456	18.9486	19.1779	19.2	19.0435	18.9784	19.1418	19.079	19.2214	19.1329	19.1298	18.924	19.0112	18.8244	0.138369	0.0996745
O43242	PSMD3	26S proteasome non-ATPase regulatory subunit 3	19.0989	19.2524	18.9812	19.1529	19.0982	19.0909	19.1949	19.2145	19.1405	19.0555	19.1551	19.2365	19.1693	19.1949	19.0296	18.9893	19.2109	18.8722	0.136753	0.0935347
Q13347	EIF3I	Eukaryotic translation initiation factor 3 subunit I	17.1745	17.5068	17.5151	17.6642	17.6298	17.5104	17.4541	17.4216	17.5428	17.5975	17.6397	17.6728	17.6452	17.6807	17.5151	17.3874	17.5824	17.5674	0.134105	0.0157318
P20338	RAB4A	Ras-related protein Rab-4A	17.6793	17.5907	17.6537	17.6374	17.595	17.8541	17.5315	17.8289	17.8476	17.749	17.6818	17.9026	17.8777	17.8585	17.5573	17.7677	17.7176	17.6818	0.132819	0.0692862
Q9Y2L5	TRAPPC8	Trafficking protein particle complex subunit 8	17.8322	17.8657	17.7842	17.9467	17.9151	17.9563	17.8452	17.7802	17.8952	17.9698	17.9695	17.8965	17.7717	17.9326	17.8569	17.7351	17.885	17.648	0.126758	0.0871908
Q99598	TSNAX	Translin-associated protein X	17.8721	17.8513	18.0888	18.1088	18.2068	18.0787	17.7686	17.8885	18.1193	18.0736	17.9297	17.967	17.8916	17.9278	17.9838	17.7634	17.7706	17.86	0.113465	0.0885747
Q9UBC2-2	EPS15L1	Isoform 2 of Epidermal growth factor receptor substrate 15-like 1	19.6659	19.9003	19.8876	19.9303	20.0439	19.9079	19.8873	20.1745	19.9857	19.9149	19.8839	19.8495	19.8405	19.8125	19.9149	20.0969	19.9027	19.938	-0.102885	0.0540989
Q96DT0-7	LGALS12	Isoform G of Galectin-12	17.7471	17.8791	18.014	17.8906	18.0542	17.8191	17.9637	17.9506	17.9186	17.8638	17.9108	17.7859	17.726	17.8229	17.8581	17.875	17.9463	18.0291	-0.105217	0.0720062
O75410-2	TACC1	Isoform 2 of Transforming acidic coiled-coil-containing protein 1	16.827	17.2057	17.1184	17.109	17.1652	17.2405	17.1684	17.134	16.9431	17.0814	17.053	17.0402	17.0764	17.0203	17.0325	17.3029	17.1919	17.1376	-0.111982	0.0645302
Q9UKG1	APPL1	DCC-interacting protein 13-alpha	17.8468	18.1489	18.1855	18.1004	18.2625	18.1762	17.9594	18.1866	18.0515	18.1356	17.9507	18.0253	18.0367	18.0354	18.0339	18.2205	18.1039	18.2823	-0.123403	0.0765127
Q9Y2I8-2	WDR37	Isoform 2 of WD repeat-containing protein 37	18.5763	18.9203	18.5003	18.7381	18.6209	18.4532	18.5479	18.5566	18.7255	18.4965	18.5814	18.6142	18.4661	18.4615	18.6741	18.6117	18.7495	18.5569	-0.124112	0.0443314
O00233	PSMD9	26S proteasome non-ATPase regulatory subunit 9	18.0784	18.235	18.1066	18.1499	18.0515	18.1178	18.1119	18.0244	18.1151	18.1161	18.2458	18.1603	18.2677	18.2408	18.4512	18.3436	18.2374	18.3198	-0.131867	0.0354882
P46109	CRKL	Crk-like protein	19.6692	19.9029	19.8611	19.7416	19.8758	19.9037	19.7982	19.8199	19.8357	19.8611	19.8138	19.7145	19.705	19.6618	19.7907	20.0667	19.8257	19.9061	-0.146054	0.0700843
P55212	CASP6	Caspase-6	17.666	17.9361	17.9796	17.8411	18.0795	17.8958	17.7872	17.7028	17.8653	17.8223	17.8347	17.7706	17.7093	17.7457	17.7629	17.9938	17.8258	18.1195	-0.148965	0.0905578
Q8TE77	SSH3	Protein phosphatase Slingshot homolog 3	17.4056	17.7172	17.8858	17.8678	17.8638	17.6809	17.7803	17.7607	17.7975	17.7433	17.7033	17.7803	17.6252	17.6001	17.7953	17.9174	17.8556	17.8093	-0.153984	0.0119864
Q14789-2	GOLGB1	Isoform 2 of Golgin subfamily B member 1	18.1721	18.1831	18.214	18.203	18.3004	18.2685	18.1561	18.185	18.0925	18.2606	18.0258	18.0271	17.9859	17.9023	18.0973	18.2915	18.2595	18.1399	-0.156739	0.0874834
Q9UEW8	STK39	STE20/SPS1-related proline-alanine-rich protein kinase	17.2922	17.5509	17.7629	17.4776	17.7849	17.7351	17.6884	18.0353	17.6766	17.7143	17.5315	17.6164	17.4841	17.5466	17.5799	17.8916	17.7424	17.7388	-0.159626	0.0621303
Q7KZF4	SND1	Staphylococcal nuclease domain-containing protein 1	19.6574	19.8668	19.7688	19.7378	19.883	19.8199	19.7804	19.9732	19.8032	19.8729	19.7753	19.7227	19.5871	19.6937	19.7754	20.0787	19.9182	19.8152	-0.166547	0.0754854
Q9ULC4-3	MCTS1	Isoform 3 of Malignant T-cell-amplified sequence 1	18.6238	18.9472	18.7233	18.7035	18.7195	18.8203	18.8669	18.7769	18.7793	18.663	18.721	18.7801	18.7008	18.8245	18.7094	19.0939	18.8733	18.9734	-0.174632	0.0615393
Q9NRL3-3	STRN4	Isoform 3 of Striatin-4	17.9354	18.0028	18.3694	18.0303	18.1926	18.2534	18.0668	18.2018	17.9705	18.1884	17.952	18.0002	17.9224	18.0193	18.0545	18.2601	18.23	18.2236	-0.175601	0.0334461
Q8WXE9-3	STON2	Isoform 2 of Stonin-2	20.1303	20.1421	20.0439	19.883	20.2563	19.9788	20.1093	20.296	19.9277	20.0703	20.0372	20.0614	19.9302	20.0248	20.4356	19.9956	20.1432	20.2354	-0.177682	0.0768611
O76003	GLRX3	Glutaredoxin-3	18.0515	18.0613	17.9743	17.8663	17.9916	17.8906	17.88	18.0973	17.7642	17.9629	17.8211	17.8648	17.9544	17.9879	17.898	18.229	18.0297	18.2282	-0.178004	0.0610559
P46976	GYG1	Glycogenin-1	19.5057	19.7157	19.6779	19.5723	19.7207	19.925	19.6191	19.7178	19.694	19.5329	19.6413	19.6453	19.556	19.6969	19.6677	19.9667	19.7406	19.7955	-0.178177	0.0301294
Q9C0F1-2	CEP44	Isoform 2 of Centrosomal protein of 44 kDa	16.8848	16.2706	16.7725	17.0665	16.3958	16.3098	16.5197	16.7389	16.8614	16.5983	16.432	16.5613	16.5385	16.4899	16.5601	16.8286	16.8263	16.6026	-0.180401	0.0384108
Q9NTK5	OLA1	Obg-like ATPase 1	20.1687	20.2944	20.2618	20.2223	20.3918	20.4087	20.2913	20.4814	20.3681	20.3637	20.2109	20.3337	20.1744	20.2584	20.327	20.6882	20.2836	20.498	-0.180925	0.0857645
Q16539	MAPK14	Mitogen-activated protein kinase 14	18.4645	18.8383	18.7494	18.9164	18.9123	18.8659	18.9276	18.9109	18.7637	18.7717	18.7893	18.7575	18.6861	18.7467	18.8479	19.1562	18.7955	18.9262	-0.181215	0.0413702
Q9UHY1	NRBP1	Nuclear receptor-binding protein	18.7691	19.149	18.9545	18.9013	19.1033	18.9396	19.0693	19.1496	18.9377	18.972	19.139	18.9251	18.9443	18.9263	19.2549	19.3349	19.0065	19.0808	-0.187935	0.0530014
P0DMM9-3	SULT1A3	Isoform 3 of Sulfotransferase 1A3	18.4968	18.7122	18.6649	18.4316	18.6604	18.6556	18.4807	18.8765	18.4902	18.4933	18.4339	18.5538	18.6996	18.4999	18.7131	18.5926	18.744	18.8584	-0.190919	0.0296265
P23381	WARS	Tryptophan--tRNA ligase, cytoplasmic	18.8673	19.0886	19.2441	18.8715	19.2145	19.1088	18.842	19.0776	18.8213	18.9511	19.0578	19.0102	18.8076	18.9166	19.0543	19.3882	19.0615	19.0635	-0.193217	0.0616202
P11047	LAMC1	Laminin subunit gamma-1	17.5586	17.5311	17.392	17.4492	17.434	17.6298	17.4931	17.6773	17.5023	17.5273	17.3618	17.3961	17.4583	17.5125	17.3934	17.6416	17.7394	17.8113	-0.195209	0.0620474
Q9UGJ0	PRKAG2	5'-AMP-activated protein kinase subunit gamma-2	16.7511	17.0337	16.9524	16.9244	17.0251	16.8938	16.9447	17.1792	16.9489	17.0086	16.9706	16.8978	16.88	16.7217	17.0764	17.2841	17.0691	16.9588	-0.201392	0.0434215
Q15370-2	ELOB	Isoform 2 of Elongin-B	19.3547	19.5623	19.3705	19.5102	19.4015	19.3675	19.6368	19.4057	19.5771	19.4069	19.5578	19.6803	19.4113	19.4399	19.6397	19.6128	19.7166	19.8385	-0.202678	0.0299783
O00170	AIP	AH receptor-interacting protein	17.6188	17.9799	17.4183	17.2818	17.5388	17.4029	17.1013	17.2587	17.4435	17.315	17.4229	17.2529	17.3148	17.1418	17.4153	17.551	17.5368	17.4805	-0.206409	0.00980267
Q8IUD2	ERC1	ELKS/Rab6-interacting/CAST family member 1	17.7527	18.3341	18.2403	18.0587	18.2692	18.1893	18.0357	18.2156	18.0492	18.241	17.9857	18.1393	17.9826	18.0529	18.0688	18.5326	18.2317	18.3207	-0.208143	0.0797621
Q9NQP4	PFDN4	Prefoldin subunit 4	17.6699	17.7935	17.8562	18.0408	17.9088	17.9395	17.6928	18.0408	17.9852	17.8958	17.7359	17.7082	17.5879	18.0398	17.8906	18.1499	17.952	18.0154	-0.208449	0.0796143
P60981	DSTN	Destrin	19.0517	19.0889	19.4057	18.9927	19.1186	19.1485	18.9031	19.3746	19.0728	19.1236	19.0045	19.0793	18.8802	19.0045	18.9893	19.3998	19.1597	19.3685	-0.210915	0.0652834
P61970	NUTF2	Nuclear transport factor 2	18.0458	18.3693	18.0581	18.1886	18.1274	18.1044	17.9106	17.5975	18.0742	18.0598	18.0476	18.0919	17.8504	18.0028	18.2357	18.1632	18.1421	18.3693	-0.217074	0.0133054
Q14240-2	EIF4A2	Isoform 2 of Eukaryotic initiation factor 4A-II	18.5483	18.9902	18.6823	18.9229	18.8502	18.7287	18.8668	19.0517	18.8392	18.8508	18.7693	18.7389	18.7063	18.687	19.0982	19.1819	18.7925	18.7996	-0.217603	0.0544609
P16157-14	ANK1	Isoform Er13 of Ankyrin-1	19.6741	19.8946	20.0667	19.8641	19.8199	19.9628	19.8901	19.994	19.9016	19.7934	19.4812	19.741	19.6468	19.7872	19.706	20.1009	19.9202	19.9238	-0.222821	0.0553274
Q6PKG0	LARP1	La-related protein 1	17.3998	17.4263	17.4669	17.4811	17.6285	17.4086	17.5962	17.5016	17.5073	17.537	17.4731	17.461	17.3315	17.4713	17.7648	17.6285	17.6371	17.6847	-0.224017	0.00203541
Q9UKK9	NUDT5	ADP-sugar pyrophosphatase	17.6789	17.6863	18.0255	17.8049	18.04	18.0066	17.9138	18.075	17.8719	17.8411	17.6605	17.7177	17.5352	17.6937	17.7328	18.2446	17.799	17.8878	-0.226405	0.0888569
Q9H7B4	SMYD3	Histone-lysine N-methyltransferase SMYD3	16.6859	17.0708	17.1823	16.9693	17.1747	17.1765	16.8216	17.5885	17.0764	17.1428	16.6479	16.6548	16.6762	16.9226	16.9199	16.9957	17.1992	17.0504	-0.232458	0.0995967
O43708	GSTZ1	Maleylacetoacetate isomerase	16.3162	16.3499	16.501	16.4743	16.604	16.4043	16.3369	16.37	16.2588	16.2572	16.0144	16.0953	16.108	16.2231	16.4443	16.4665	16.386	16.1984	-0.234198	0.0153046
L0R6Q1	SLC35A4	SLC35A4 upstream open reading frame protein	18.7995	18.6765	18.809	18.389	18.809	18.8508	18.4847	18.214	18.7888	18.6486	18.2961	18.6403	18.3621	18.573	18.5401	18.7287	18.6904	19.0033	-0.236581	0.0866716
A6NDU8	C5orf51	UPF0600 protein C5orf51	15.6703	15.9572	16.1002	16.2636	16.2157	15.9286	15.8716	16.1776	16.3191	16.1893	15.9736	15.8846	15.9363	15.58	16.1239	16.2963	16.1644	16.016	-0.237354	0.0933428
P61457	PCBD1	Pterin-4-alpha-carbinolamine dehydratase	15.3851	15.7362	15.682	16.0041	15.7626	15.5491	15.6974	15.3222	15.8464	15.6695	15.471	15.4363	15.4651	15.6805	16.0345	15.9632	15.6137	15.5261	-0.239897	0.0991701
Q96KP4	CNDP2	Cytosolic non-specific dipeptidase	19.2736	19.6911	19.6407	19.4686	19.5159	19.5634	19.5111	19.6037	19.417	19.4962	19.4832	19.4171	19.2849	19.4496	19.4669	19.9037	19.5013	19.815	-0.24551	0.0533195
Q9Y4H2	IRS2	Insulin receptor substrate 2	16.0486	16.2147	16.1836	16.1858	16.3042	16.1245	16.063	16.4017	16.0855	16.2664	16.0196	15.9713	16.0044	15.8273	16.0872	16.5615	16.2185	16.1928	-0.247197	0.080145
O75674	TOM1L1	TOM1-like protein 1	16.2069	16.6491	16.7618	16.6337	16.8046	16.6055	16.5855	16.6092	16.3293	16.6092	16.5413	16.3847	16.64	16.535	16.5184	17.0258	16.7707	16.8442	-0.247756	0.0504124
Q9BXD5	NPL	N-acetylneuraminate lyase	16.7602	16.8678	17.2605	16.5827	17.5266	17.4556	17.0754	17.3039	16.5533	17.1829	16.7863	17.0193	16.8904	16.8984	17.172	17.3475	17.3437	16.958	-0.249852	0.0600949
Q9Y316-3	MEMO1	Isoform 3 of Protein MEMO1	17.7143	18.1629	18.5317	17.8828	18.2915	18.166	18.0693	18.3777	17.9253	18.1743	17.9009	17.806	17.9732	17.9587	18.0819	18.4422	18.1007	18.235	-0.252306	0.0398616
Q15904	ATP6AP1	V-type proton ATPase subunit S1	17.6015	17.2536	17.953	17.9395	17.5043	17.2176	17.7615	17.7921	18.3561	17.3675	17.368	17.5961	17.4633	17.4446	17.8485	17.4357	17.6939	17.8381	-0.256143	0.033233
Q15418-2	RPS6KA1	Isoform 2 of Ribosomal protein S6 kinase alpha-1	16.1541	16.2261	16.6726	16.4053	16.5884	16.4529	16.3793	16.4708	16.458	16.2845	16.2291	16.157	16.299	16.0224	16.7692	16.5798	16.1427	16.3342	-0.258109	0.0946088
Q9NVJ2	ARL8B	ADP-ribosylation factor-like protein 8B	19.2501	18.6658	19.0768	18.9597	18.9341	19.0168	18.8363	18.9744	18.847	18.9059	18.5564	18.7538	18.7803	18.9547	19.1265	19.1509	18.7846	19.1318	-0.258248	0.0519473
Q9Y2B0	CNPY2	Protein canopy homolog 2	16.0659	16.4393	15.8654	16.3786	16.3942	16.0291	16.3168	16.5436	16.4726	16.3459	16.1537	16.1048	16.0405	16.0875	16.2181	16.4301	16.3665	16.6168	-0.261421	0.0275226
Q8NBM8	PCYOX1L	Prenylcysteine oxidase-like	19.0942	19.1938	19.1122	18.9824	19.1405	19.249	19.069	19.6298	19.0669	19.0197	19.1156	18.9494	19.0391	19.0494	18.9669	19.2441	19.3109	19.681	-0.266076	0.0848301
Q5T013	HYI	Putative hydroxypyruvate isomerase	17.6549	18.0741	18.831	18.0831	18.8426	19.0094	17.9408	18.081	18.2001	18.0339	17.8652	17.8122	17.6549	17.7219	18.2554	18.2814	17.8084	17.9989	-0.268409	0.0658382
P28070	PSMB4	Proteasome subunit beta type-4	17.2731	18.0057	17.8059	17.6184	17.9288	17.6951	17.1394	17.9103	17.7406	17.6135	17.7976	17.6454	17.5475	17.5005	17.7602	18.0066	17.8904	17.9465	-0.280071	0.00679283
P49758-3	RGS6	Isoform 3 of Regulator of G-protein signaling 6	17.6971	18.0118	18.0261	18.1145	18.0942	18.0429	18.0578	18.2254	18.1899	18.0212	17.6169	17.8874	17.7806	17.6708	18.0648	18.2655	17.9558	18.0213	-0.28151	0.0276603
Q16363	LAMA4	Laminin subunit alpha-4	17.256	17.3497	17.3482	17.25	17.3324	17.6909	17.2138	17.6506	17.3495	17.3519	17.2083	17.1659	17.2124	17.2308	17.2318	17.8095	17.493	17.5311	-0.282498	0.0367686
Q96IZ0	PAWR	PRKC apoptosis WT1 regulator protein	15.8821	15.9492	15.8984	15.7282	16.172	15.7576	15.8677	15.4216	15.6499	15.9305	15.5492	15.5174	15.5174	15.5673	15.6362	16.2602	15.8978	15.8346	-0.290844	0.0854965
Q9HCN8	SDF2L1	Stromal cell-derived factor 2-like protein 1	17.4704	17.2816	17.6162	17.3538	17.6496	17.5878	17.2882	17.4871	17.3562	17.5746	16.9251	17.1933	17.1762	17.1585	17.3297	17.801	17.457	17.4415	-0.301781	0.0815354
P23284	PPIB	Peptidyl-prolyl cis-trans isomerase B	20.3985	20.69	20.1745	20.6504	20.4051	20.3309	20.5082	20.5814	20.555	20.2737	20.4322	20.5585	20.1954	20.4085	20.3637	20.7203	20.5905	21.0277	-0.301923	0.0701428
P35244	RPA3	Replication protein A 14 kDa subunit	16.1589	16.5242	16.361	16.4027	16.1776	16.2469	15.8193	16.309	16.2738	15.9366	16.2018	16.3456	16.1608	15.998	16.3081	16.3792	16.6563	16.3889	-0.304591	0.0246984
P43487	RANBP1	Ran-specific GTPase-activating protein	18.3672	18.6926	19.0283	18.7419	18.9519	18.9746	18.569	18.6053	18.8637	18.7741	18.6992	18.6874	18.4023	18.4893	18.8112	19.1289	18.6959	19.0273	-0.305409	0.0357649
O60841	EIF5B	Eukaryotic translation initiation factor 5B	18.4405	18.1223	18.1818	18.331	18.1469	18.2191	17.8384	17.8555	18.2783	18.0515	17.8743	17.9602	17.9893	17.767	18.2128	18.2345	18.1974	18.3322	-0.31574	0.00141673
P61018-2	RAB4B	Isoform 2 of Ras-related protein Rab-4B	18.6348	18.7267	18.3372	18.8324	18.5467	18.8192	18.5428	18.7007	18.831	18.3258	18.6156	18.4727	18.3795	18.3795	18.7653	18.7695	18.6292	18.8419	-0.316856	0.00266668
O60869	EDF1	Endothelial differentiation-related factor 1	14.6347	14.7419	14.6679	15.0086	15.134	14.693	14.7325	15.2637	14.5602	14.9312	14.5087	14.5958	14.8646	14.7732	15.0749	15.144	14.8291	15.1866	-0.323977	0.0254297
Q0VDG4	SCRN3	Secernin-3	15.9611	16.0777	16.8979	16.4097	16.6244	16.7381	16.2637	16.8355	16.4805	16.557	16.1079	16.1226	15.9361	16.1629	16.4755	16.7012	16.3307	16.5036	-0.325441	0.0457443
Q14019	COTL1	Coactosin-like protein	19.1762	19.6087	19.8893	19.3237	19.4033	19.6052	19.2658	19.8893	19.4975	19.4466	19.4089	19.1674	19.0601	19.1942	19.2839	20.0732	19.4491	19.5221	-0.32664	0.0996265
Q7Z2Z2	EFL1	Elongation factor-like GTPase 1	18.4014	18.6888	18.6303	18.3999	18.6163	18.6756	18.4666	18.8392	18.4084	18.4627	18.5137	18.4196	18.5305	18.3898	18.4292	18.8659	18.5903	19.2782	-0.327662	0.0889369
Q9H0U4	RAB1B	Ras-related protein Rab-1B	18.7465	18.9252	19.4975	18.8323	19.0289	19.415	18.7975	19.3137	18.8784	18.9529	18.5803	18.6463	18.5071	18.5208	18.6719	19.2162	18.7689	19.2313	-0.330588	0.0756705
P30040	ERP29	Endoplasmic reticulum resident protein 29	18.8047	19.1378	19.476	19.1613	19.6068	19.4273	19.0634	19.425	19.3296	19.4477	18.9486	19.0235	18.9034	19.0323	19.2145	19.7732	19.1355	19.4964	-0.333804	0.0880408
P46926	GNPDA1	Glucosamine-6-phosphate isomerase 1	17.7972	17.6913	17.1895	17.1065	17.301	17.3495	17.3477	17.3243	17.392	17.108	17.5619	17.3356	17.1869	17.3034	17.7166	17.5531	17.488	17.8116	-0.343156	0.0163186
Q15785	TOMM34	Mitochondrial import receptor subunit TOM34	17.3956	17.6483	17.8257	17.7262	17.8223	17.7287	17.3592	17.9068	17.6251	17.7811	17.4372	17.561	17.3093	17.1841	17.7424	18.1171	17.7084	17.6351	-0.346201	0.054863
P07093-3	SERPINE2	Isoform 3 of Glia-derived nexin	19.4972	19.7557	19.9303	19.8051	20.0703	19.9177	20.0818	20.2526	19.5723	20.0046	19.4944	19.2377	19.6672	19.792	19.9357	20.2223	19.6647	20.1371	-0.350747	0.0976506
Q9H299	SH3BGRL3	SH3 domain-binding glutamic acid-rich-like protein 3	18.3508	19.0379	18.0455	18.9021	18.166	18.3843	18.9938	18.536	18.7544	18.3135	18.6039	18.8524	18.2185	18.1693	18.483	18.824	18.7537	19.0738	-0.352091	0.0934354
Q9H4A5	GOLPH3L	Golgi phosphoprotein 3-like	17.0673	17.4788	17.382	17.3176	17.5448	17.5499	17.5045	17.3859	17.1551	17.3065	17.3019	17.3282	17.0044	17.3081	17.4284	17.8968	17.4432	17.6523	-0.355332	0.0203658
Q9H8M7	MINDY3	Ubiquitin carboxyl-terminal hydrolase MINDY-3	15.5119	15.5119	15.7969	15.5072	15.7244	15.7009	15.5331	15.6099	15.7212	15.6838	15.3876	15.177	15.0815	15.0815	15.3437	15.999	15.6949	15.5647	-0.368293	0.0763691
Q14764	MVP	Major vault protein	18.0187	17.7968	17.9515	17.9947	18.2717	18.1413	17.7094	18.5337	18.0036	18.2147	17.7061	17.6878	17.6038	17.9378	18.0774	18.692	17.9185	18.1472	-0.378754	0.0917879
Q9UHB6-4	LIMA1	Isoform 4 of LIM domain and actin-binding protein 1	17.0646	17.6884	17.4349	17.5448	17.688	17.1673	17.7555	18.3123	17.3308	17.5171	17.4618	17.1195	17.2545	17.2573	17.2996	18.1811	17.8335	17.5698	-0.398955	0.067915
Q9NWV8	BABAM1	BRISC and BRCA1-A complex member 1	17.0097	17.1113	17.7512	16.9327	16.7415	16.9403	16.8713	16.4792	16.5884	16.7098	16.8927	16.9043	17.0107	16.8168	17.2459	17.9056	17.052	16.9769	-0.428226	0.0630376
P15531-2	NME1	Isoform 2 of Nucleoside diphosphate kinase A	20.3151	20.407	20.7203	20.2149	21.0391	20.8541	20.1948	21.0933	20.4304	20.7833	20.106	20.0327	19.9386	20.1304	20.4509	20.931	20.273	20.9034	-0.441353	0.0884859
P08758	ANXA5	Annexin A5	18.8249	19.3402	19.4082	18.8933	19.9149	19.466	19.0568	19.7907	18.9468	18.9468	19.1334	19.0331	18.9002	19.1407	19.4307	20.1187	19.11	19.2324	-0.442075	0.0681837
Q9HCN6	GP6	Platelet glycoprotein VI	18.8461	18.8929	19.7072	19.0253	19.2101	19.3173	18.9112	19.2878	19.1439	19.0754	18.827	18.6854	18.8594	18.8783	19.1691	19.8848	19.0535	19.2184	-0.466347	0.0354575
P38571	LIPA	Lysosomal acid lipase/cholesteryl ester hydrolase	16.7965	16.6575	17.3412	16.6748	17.0637	16.8738	16.6756	17.8565	16.9786	17.1376	16.4632	16.355	16.7096	17.0516	17.0647	17.6526	17.1903	17.055	-0.49725	0.0538999
Q9ULZ3	PYCARD	Apoptosis-associated speck-like protein containing a CARD	17.1619	17.299	16.4204	16.7588	16.5053	16.9899	17.2904	16.8365	17.0312	16.4005	16.5141	17.1822	16.2446	17.0349	17.062	16.9584	17.0926	17.7026	-0.528609	0.0772598
Q8TEQ6	GEMIN5	Gem-associated protein 5	17.6715	16.406	16.4223	16.5492	16.37	16.3147	16.9847	16.3729	16.5198	16.3039	16.2778	15.9162	15.3042	16.7436	16.522	16.5101	16.8379	16.6995	-0.533252	0.0994501
Q8N910	C15orf56	Putative uncharacterized protein C15orf56	20.2239	20.746	20.9178	20.3918	21.7802	21.2728	20.4606	21.7464	20.5509	20.5814	20.1889	20.3058	19.9514	20.4606	20.7087	21.8504	20.4401	20.8582	-0.666727	0.0598757
Q96IJ6-2	GMPPA	Isoform 2 of Mannose-1-phosphate guanyltransferase alpha	17.7246	17.0789	17.3527	17.3661	17.3508	17.3297	16.4133	17.362	17.1463	17.2342	16.2607	16.2299	16.0163	16.2359	17.2653	17.6175	17.4961	16.9398	-0.934313	0.0116741
